# Supplementary material
Source: PubMed Central journal article supplement (PMC3989465)
Supplement: NIHMS542467-supplement-01.pdf [file NIHMS542467-supplement-01.pdf]

## Supplemental Materials and Methods

### *Patients and Samples*

Institutional review board (The Rockefeller University and Weill Cornell Medical College) approval and written informed consent were obtained before enrolling patients to participate in this study. The study was performed in adherence with the Declaration of Helsinki Principles. Cutaneous SCC samples were obtained from debulking during Mohs micrographic surgery. All tumors were obtained from sun-exposed skin. Normal specimens were obtained from non-sun-exposed areas of patients without skin cancer.

### *LCM*

SCC (n=10) and normal skin (n=10) were subjected to LCM. Frozen tissue sections were cut at 8.0 $\mu$ m in a -20°C cryostat and placed on membrane mounted metal frame slides (Molecular Machines and Industries, Haslett, MI), then stored at -80°C. Slides were stained with abbreviated Hematoxylin & Eosin (H&E) prior to LCM. LCM was performed following the manufacturer's protocol for the CellCut system (Molecular Machines and Industries). Laser captured tissues were collected in 100.0 $\mu$ l of RLT buffer (QIAGEN, Valencia, CA) containing 1%  $\beta$ -mercaptoethanol (Fisher Scientific, Fair Lawn, NJ) within 2 hours after starting H&E staining in order to prevent RNA degradation. The samples in RLT buffer were stored at -80°C until RNA extraction was performed. Normal skin samples used in this study as a reference came from our previous study (Kennedy-Crispin *et al*, 2012)

### *RNA extraction and quantification*

Total RNA from LCM samples was extracted into 24.0 $\mu$ l of RNase free water using the RNeasy Micro Kit (QIAGEN) according to the manufacturer's protocol with on-column DNase digestion. Quantitative reverse transcribe polymerase chain reaction (qRT-PCR) for RPLP0/hARP using TaqMan EZ PCR Core Reagent (Applied Biosystems, Foster City, CA) was performed in order to estimate the concentration of RNA. Briefly, 1.0 $\mu$ l of total RNA was diluted into 2.0 $\mu$ l of RNase free water. One  $\mu$ l of diluted total RNA was applied into a well with 49.0 $\mu$ l of RT-PCR reaction buffer including 3.0 $\mu$ l of primers and probe mix. Serial dilutions of total RNA (ranging from 2000.0 pg/ $\mu$ l to 1.0 pg/ $\mu$ l) extracted from human skin tissues were prepared and used to generate the standard curve. The samples were amplified and quantified by 7900HT Fast Real-Time PCR System (Applied Biosystems) using the following thermal cycler conditions: 2 minutes at 50°C; 30 minutes at 60°C; 5 minutes at 95°C; and 45 cycles of 15 seconds at 95°C followed by 60 seconds at 62°C. Assays were performed in triplicate. The quality of extracted RNA was evaluated using Agilent Bioanalyzer (Agilent, Santa Clara, CA).

### *RNA amplification and hybridization*

One ng of total RNA was subjected to Affymetrix two-cycle cDNA synthesis (Affymetrix, Santa Clara, CA), with a slight modification described previously

(Mitsui *et al.*, 2012). Biotin labeling of cRNA transcripts was done with the GeneChip IVT Labeling Kit (Affymetrix). Fifteen  $\mu\text{g}$  of biotin-labeled RNA was fragmented and hybridized to Human Genome U133 A2.0 arrays (Affymetrix) and washed, stained, and scanned according to the manufacturer's protocol. The data have been deposited at the Gene Expression Omnibus repository (GSE42677).

### *SCC Cell lines*

Two human cutaneous SCC cell lines were used in this study. A431 cell line was purchased from ATCC (Manassas, VA). A431 cells were established from an 85-year-old female. This cell line forms growing subcutaneous tumors in immunosuppressed mice (Giard DJ, *et al.* 1973). The histology showed a poorly differentiated SCC. This cell line is able to form lung metastasis when injected intravenously (Price *et al.* 1988). SCC13 cells were kindly provided by professor Rheinwald (Harvard Medical Center, MA). SCC13 cells were established from a tumor on a face of a 56-year-old female. This cell line formed a tumor in subcutaneous regions of nude mice. The histology showed large differentiating cysts with a more organized structure as well as regions of typical SCC, but these cells lack invasive capacity beyond the mouse dermis (Rheinwald and Beckett, 1981).

### *Cell culture*

Dulbecco's Modified Eagle Medium (DMEM), High Glucose (Gibco, Grand Island, NY) supplemented with 10% Fetal Bovine Serum (ATCC) was used to grow A431 and HaCaT cells. SCC13 cells were maintained in the Keratinocyte serum free medium supplemented with 25  $\mu\text{g}/\text{ml}$  bovine pituitary extract, 0.2 ng/ml epidermal growth factor, and 0.4mmol/L  $\text{CaCl}_2$  (all from Gibco). The cells were seeded at a density of 1,000 cells/ $\text{cm}^2$  in the appropriate medium in 6-well plate at 37°C in a humidified atmosphere containing 5%  $\text{CO}_2$ . The cells were starved in empty media for 24 hours when they reached more than 90% confluence, followed by stimulation with one of following cytokines for 24 hours: IL-20 (100ng/ml, R&D, Minneapolis, MN), IL-24 (40ng/ml or 100ng/ml, R&D), TNF- $\alpha$  (10ng/ml), TGF- $\alpha$  (20ng/ml), and IFN- $\gamma$  (20ng/ml). After cytokine treatment, the cells were lysed in RLT buffer (QIAGEN) containing 1%  $\beta$ -mercaptoethanol (Fisher Scientific), and total RNA was extracted.

### *Wound healing assay*

A431 cells were seeded into a 12 well flask in 2 ml of DMEM supplemented with 10%FBS. When they reached more than 90% confluence, a wound was using a 200 $\mu\text{l}$  pipet tip. The cells were washed twice with PBS and 2ml of DMEM supplemented with either 0.1% or 10% FBS was added. An MMP7Ab (Ito *et al.* 2007) (R&D systems) was added to the media at the indicated concentrations (PBS only, 20ng/ml, 200ng/ml, and 2000ng/ml). The wounds were photographed at 0, 12, 24, and 36 hours. The area of wound was estimated by measuring pixels using the ImageJ program (NIH, Bethesda, MD). Two independent areas were photographed from single wound of each condition at each time point and

average of those two areas were taken. The experiment was repeated three times. A percent of wound closure was calculated using the following equation:

$$[\% \text{ wound closure}] = ([\text{pixels at 0h}] - [\text{pixels at each time point}]) / [\text{pixels at 0h}]$$

#### *Pre-amplification quantitative RT-PCR*

Pre-amplification quantitative RT-PCR technique was used for measuring 23 MMPs, IL-20, IL-24, IL20 receptor (IL20R)1, IL20R2, and IL22R1 values in total RNA extracted from laser captured samples according to the company's instruction (Applied Biosystems). This technique allows us to evaluate up to 100 targets from as low as 1 ng of cDNA by quantitative PCR measurement. Briefly, five ng of total RNA was subjected to first-strand cDNA synthesis using High Capacity cDNA Reverse Transcription Kits (Applied Biosystems). The resulting cDNA was subjected to 14 cycles of pre-amplification using TaqMan PreAmp Master Mix Kit (Applied Biosystems) with desired pooled assay mix (Applied Biosystems). The Gene Amp PCR System 9700 (Applied Biosystems) was used for pre-amplification reaction with the following thermal cycler conditions: 10 min at 95°C and 14 cycles of 15 seconds at 95°C followed by 4 min at 60°C. 12.5µl of pre-amplified cDNA was then used for quantitative PCR reaction using TaqMan Gene Expression Master Mix (Applied Biosystems). The 7900HT Fast Real-Time PCR System was used for PCR reaction, and the thermal cycler conditions were as follows: 2 minutes at 50°C, 5 minutes at 95°C, and 40 cycles of 15 seconds at 95°C followed by 60 seconds at 60°C. All reactions were performed in duplicate. All data were normalized to RPLP0/hARP. Primers and probes used in this experiment are listed in Table S7.

#### *Quantitative RT-PCR*

Regular TaqMan RT-PCR method was used to detect the MMP7, MMP13, and IL-24 signals in total RNA extracted from cultured cells. Ten ng of total RNA was used for each reaction. The TaqMan EZ PCR core reagents (Applied Biosystems) were used with the 7900HT Fast Real-Time PCR System. Thermal cycler conditions were as follows: 2 minutes at 50°C, 30 minutes at 60°C, 5 minutes at 95°C, and 40 cycles of 15 seconds at 95°C followed by 60 seconds at 60°C. All reagents were purchased from Applied Biosystems. All data were normalized to RPLP0/hARP. For the analysis, a value of 0 (no amplification) was replaced with 25% of the minimum quantity for each gene in order to obtain logarithmic values. Primers and probes used in this experiment are listed in Table S8.

#### *Immunohistochemistry (IHC)*

Frozen skin sections were prepared. Tissue sections were incubated with primary antibodies at 4°C overnight. Secondary biotin-labeled horse anti-mouse antibody (Vector Laboratories, Burlingame, CA) was amplified with avidin-biotin complex (Vector Laboratories). We used the chromogen 3-Amino-9 ethylcarbazole (Sigma-Aldrich, St. Louis, MO). Antibodies used in this experiment are listed in Table S7.

### *Statistical analysis*

cDNA microarray data were analyzed using R/Bioconductor packages ([www.r-project.org](http://www.r-project.org)). The Harshlight package (Suárez-Fariñas *et al*, 2005) was used to scan Affymetrix chips for spatial artifacts. Expression values were obtained using gcrma algorithm. Probe-sets with standard deviation larger than 0.2 and expression values above 3 for at least 3 samples were included in the analysis. Expression values were linearly modeled in the *limma* package framework. For the comparison of interest, the moderated t-test was used to assess differential expression. P-values for each comparison were adjusted for multiple hypotheses using the Benjamini-Hochberg approach. Genes with false discovery rate (FDR)<0.05 and fold change (FCH)>3.0 were considered as differentially expressed genes (DEGs).

Statistical analysis of all RT-PCR data was performed using Graphpad Prism ver.5 (GraphPad Software, La Jolla, USA). One-way ANOVA followed by Tukey's multiple comparison correction was performed. A  $p<0.05$  was considered as statistically significant.



## Supplemental References

Giald DJ, Aaronson SA, Todaro GJ *et al.* In vitro cultivation of human tumors: establishment of cell lines derived from a series of solid tumors. *J Natl Cancer Inst* 1973; 51: 1417-1423

Ito T-K, Ishii G, Chiba H, and Ochiai A. The VEGF angiogenic switch of fibroblasts is regulated by MMP-7 from cancer cells. *Oncogene* 2007; 26: 7194–7203

Kennedy-Crispin M, Billick E, Mitsui H *et al.* Human keratinocytes have a response to injury that upregulates CCL20 and other genes linking innate and adaptive immunity. *J Invest Dermatol* 2012; 132: 105-113

Mitsui H, Suárez-Fariñas M, Belkin DA *et al.* Combined Use of Laser Capture Microdissection and cDNA Microarray Analysis Identifies Locally Expressed Disease-Related Genes in Focal Regions of Psoriasis Vulgaris Skin Lesions. *J Invest Dermatol* 2012; 132: 1615-1626

Price JE, Sauder DN, and Fidler IJ. Tumorigenicity and metastatic behavior in nude mice of two human squamous cell carcinoma lines that differ in production of the cytokine ETAF/IL-1. *J Invest Dermatol* 1988; 91: 258-262

Rheinwald JG and Beckett MA. Tumorigenic keratinocyte lines requiring anchorage and fibroblast support cultured from human squamous cell carcinomas. *Cancer Res* 1981; 41: 1657-1663

Suárez-Fariñas M, Pellegrino M, Wittkowski KM *et al.* Harshlight: a "Corrective Make-Up" Program for Microarray Chips. *BMC Bioinformatics* 2005; 6; 294

**Table S5. Canonical pathways found to be significant in SCC invasion signature gene set.**

| Canonical pathway                                                         | p-value               | Molecules in the pathway                                                                                              |
|---------------------------------------------------------------------------|-----------------------|-----------------------------------------------------------------------------------------------------------------------|
| Leukocyte Extravasation Signaling                                         | 9.56x10 <sup>-4</sup> | MMP7,PXN,ICAM1,PRKCQ,MMP3,CXCR4,MMP13,CLDN7,PIK3R3,GNAI2,WASL,TIMP1,VAV3,MAPK10,MMP12,CTTN,MMP17,ARHGAP8/PRR5-ARHGAP8 |
| Aryl Hydrocarbon Receptor Signaling                                       | 1.46x10 <sup>-3</sup> | CDKN2A,CCNE2,null,NFIC,ALDH8A1,EP300,JUN,ALDH1A3,ALDH3A2,ALDH18A1,NFIB,CDKN1B,ESR1,ALDH5A1                            |
| HIF1 $\alpha$ Signaling                                                   | 1.54x10 <sup>-3</sup> | NOS1,PIK3R3,MMP7,JUN,MMP3,MAPK10,MMP13,VEGFC,MMP12,MMP17,P4HTM,EP300                                                  |
| RAR Activation                                                            | 2.17x10 <sup>-3</sup> | ADCY2,PRKCQ,RBP1,EP300,PIK3R3,CSF2RB,KAT2B,CSNK2A2,JUN,DHRS9,ALDH1A3,SMARCA2,MAPK10,NCOR1,PML,CITED2                  |
| LPS/IL-1 Mediated Inhibition of RXR Function                              | 2.57x10 <sup>-3</sup> | null,ALDH8A1,IL1R1,ABCA1,PAPSS2,IL1R2,ACSBG1,JUN,ALDH1A3,ALDH3A2,CHST3,ALAS1,CHST11,HS3ST1,ALDH18A1,TNFRSF1B,ALDH5A1  |
| Hepatic Fibrosis / Hepatic Stellate Cell Activation                       | 3.33x10 <sup>-3</sup> | IL8,ICAM1,FN1,IFNGR2,MMP13,VEGFC,FGFR2,IL1R1,CCL5,IL1R2,TIMP1,EDNRA,TNFRSF1B                                          |
| ILK Signaling                                                             | 3.73x10 <sup>-3</sup> | MUC1,PXN,FN1,RHOC,FERMT2,PPP2R3B,VEGFC,PIK3R3,JUN,KRT18,PPAP2B,MAPK10,RPS6KA4,IRS2,RPS6KA5,PPP2R1B                    |
| Pathogenesis of Multiple Sclerosis                                        | 5.80x10 <sup>-3</sup> | CXCL10,CCL4,CCL5                                                                                                      |
| HMGB1 Signaling                                                           | 8.09x10 <sup>-3</sup> | PIK3R3,IL8,KAT2B,ICAM1,JUN,RHOC,MAPK10,IFNGR2,IL1R1,TNFRSF1B                                                          |
| Melanocyte Development and Pigmentation Signaling                         | 1.04x10 <sup>-2</sup> | TYRP1,PIK3R3,ADCY2,KIT,RPS6KA4,RPS6KA5,DCT,RPS6KA1,EP300                                                              |
| Bladder Cancer Signaling                                                  | 1.12x10 <sup>-2</sup> | CDKN2A,IL8,MMP7,MMP3,MMP13,VEGFC,RPS6KA5,MMP12,MMP17                                                                  |
| Lysine Degradation                                                        | 1.14x10 <sup>-2</sup> | BLMH,SOLH,FGL2,MMP13,ELOVL6,ALDH1A3,ALDH3A2,CASP1,ALDH5A1,PLOD3,KYNU,GZMB,BMP1                                        |
| IL-17 Signaling                                                           | 1.55x10 <sup>-2</sup> | CXCL10,PIK3R3,IL8,JUN,MMP3,TIMP1,MAPK10,CXCL1                                                                         |
| VDR/RXR Activation                                                        | 1.94x10 <sup>-2</sup> | CXCL10,SPP1,PRKCQ,IL1RL1,NCOR1,CCL5,CDKN1B,EP300                                                                      |
| Glycerolipid Metabolism                                                   | 1.95x10 <sup>-2</sup> | AGPAT4,SPHK2,DHRS9,ALDH1A3,ALDH3A2,PPAP2B,MGLL,AKR1B1,ALDH5A1                                                         |
| Aggrin Interactions at Neuromuscular Junction                             | 2.52x10 <sup>-2</sup> | PXN,JUN,MAPK10,ITGA6,ITGA5,ITGA3,CTTN                                                                                 |
| PPAR Signaling                                                            | 2.54x10 <sup>-2</sup> | IL1R2,JUN,NCOR1,IL1R1,TNFRSF1B,NFKBIB,CITED2,EP300                                                                    |
| Type I Diabetes Mellitus Signaling                                        | 3.14x10 <sup>-2</sup> | PIAS1,MAPK10,IFNGR2,HLA-DOB,IL1R1,TNFRSF1B,NFKBIB,IRF1,GZMB                                                           |
| Methionine Metabolism                                                     | 3.65x10 <sup>-2</sup> | null,BHMT,ALAS1,MTR                                                                                                   |
| IL-6 Signaling                                                            | 3.69x10 <sup>-2</sup> | IL1R2,IL8,CSNK2A2,JUN,MAPK10,IL1R1,TNFRSF1B,NFKBIB                                                                    |
| Production of Nitric Oxide and Reactive Oxygen Species in Macrophages     | 3.86x10 <sup>-2</sup> | PIK3R3,JUN,PRKCQ,RHOC,MAPK10,IFNGR2,PPP2R3B,TNFRSF1B,NFKBIB,PPP2R1B,IRF1,SIRPA                                        |
| Bile Acid Biosynthesis                                                    | 3.90x10 <sup>-2</sup> | DHRS9,ALDH1A3,SRD5A1,ALDH3A2,ALDH5A1                                                                                  |
| Inhibition of Angiogenesis by TSP1                                        | 4.08x10 <sup>-2</sup> | CD47,JUN,HSPG2,GUCY1A3                                                                                                |
| Death Receptor Signaling                                                  | 4.10x10 <sup>-2</sup> | TNFRSF21,TNFRSF10B,TNFSF10,TNFRSF1B,NFKBIB,DIABLO                                                                     |
| Induction of Apoptosis by HIV1                                            | 4.40x10 <sup>-2</sup> | CXCR4,MAPK10,TNFRSF1B,NFKBIB,DIABLO,BAK1                                                                              |
| OX40 Signaling Pathway                                                    | 4.62x10 <sup>-2</sup> | JUN,MAPK10,HLA-DOB,NFKBIB,HLA-DPA1                                                                                    |
| Role of Osteoblasts, Osteoclasts and Chondrocytes in Rheumatoid Arthritis | 4.85x10 <sup>-2</sup> | SPP1,MMP3,ITGA5,MMP13,IL1R1,ITGA3,PIK3R3,IL1R2,NFAT5,JUN,MAPK10,BMP7,NFKBIB,TNFRSF1B,BMP1                             |
| Amyotrophic Lateral Sclerosis Signaling                                   | 4.88x10 <sup>-2</sup> | NOS1,PIK3R3,NEFL,CASP1,NEFM,GLUL,VEGFC,CAPN7                                                                          |

**Table S6. Results of the proportional odds model**

|        | Beta  | e <sup>beta</sup> | SEM  | LCI   | UCI  | <i>P</i> |
|--------|-------|-------------------|------|-------|------|----------|
| MMP10  | 0.30  | 1.35              | 0.09 | 0.15  | 0.54 | <0.0001  |
| MMP1   | 0.23  | 1.25              | 0.07 | 0.11  | 0.38 | <0.0001  |
| MMP13  | 0.56  | 1.75              | 0.19 | 0.25  | 1.03 | <0.0001  |
| MMP7   | 0.23  | 1.26              | 0.08 | 0.09  | 0.40 | 0.0006   |
| MMP12  | 0.26  | 1.30              | 0.09 | 0.10  | 0.45 | 0.0008   |
| MMP3   | 0.24  | 1.27              | 0.08 | 0.09  | 0.42 | 0.0011   |
| MMP11  | 0.47  | 1.60              | 0.17 | 0.17  | 0.86 | 0.0015   |
| MMP17  | 1.03  | 2.81              | 0.38 | 0.34  | 1.88 | 0.0024   |
| MMP9   | 0.66  | 1.94              | 0.25 | 0.22  | 1.22 | 0.0025   |
| MMP25  | 0.54  | 1.72              | 0.23 | 0.14  | 1.05 | 0.0074   |
| MMP2   | 0.46  | 1.59              | 0.20 | 0.11  | 0.90 | 0.0083   |
| MMP16  | 0.19  | 1.20              | 0.08 | 0.04  | 0.36 | 0.0133   |
| MMP24  | 0.53  | 1.70              | 0.23 | 0.09  | 1.03 | 0.0175   |
| MMP19  | 0.46  | 1.59              | 0.22 | 0.06  | 0.94 | 0.0224   |
| MMP15  | 0.80  | 2.22              | 0.52 | -0.15 | 1.95 | 0.1021   |
| MMP27  | 0.24  | 1.27              | 0.16 | -0.07 | 0.57 | 0.1246   |
| MMP20  | 0.47  | 1.60              | 0.33 | -0.15 | 1.23 | 0.1384   |
| MMP14  | 0.61  | 1.84              | 0.43 | -0.20 | 1.53 | 0.1406   |
| MMP28  | -0.39 | 0.68              | 0.28 | -1.00 | 0.14 | 0.1487   |
| MMP21  | -0.12 | 0.89              | 0.09 | -0.30 | 0.05 | 0.1824   |
| MMP23B | -0.21 | 0.81              | 0.32 | -0.90 | 0.40 | 0.5094   |
| MMP8   | -0.12 | 0.89              | 0.27 | -0.71 | 0.46 | 0.6571   |
| MMP26  | NA    | NA                | NA   | NA    | NA   | NA       |

Proportional odds model indicates that gene expression of MMPs increases the odds of being in a higher path towards malignancy. A  $p < 0.05$  was considered as significant. MMP26 could not be evaluated since the expression of this gene in all normal epidermis and AK regions were not detected at all.

**Table S7. Primers and probes used in this study**

| Gene symbol | GenBank accession number | Sequence      |                                    |
|-------------|--------------------------|---------------|------------------------------------|
| RPLP0/hARP  | NM_001002                | Forward       | CGCTGCTGAACATGCTCAA                |
|             |                          | Reverse       | TGTCGAACACCTGCTGGATG               |
|             |                          | Probe         | 6-FAM-TCCCCCTTCTCCTTTGGGCTGG-TAMRA |
|             |                          | Assay ID      |                                    |
| MMP1        | NM_002412.1              | Hs00899658_m1 |                                    |
| MMP2        | NM_004521.1              | Hs01548727_m1 |                                    |
| MMP3        | NM_002413.1              | Hs00968305_m1 |                                    |
| MMP7        | NM_002414.1              | Hs01042796_m1 |                                    |
| MMP8        | NM_002415.1              | Hs01029057_m1 |                                    |
| MMP9        | NM_004985.2              | Hs00234579_m1 |                                    |
| MMP10       | NM_002416.1              | Hs00233987_m1 |                                    |
| MMP11       | NM_005931.2              | Hs00171829_m1 |                                    |
| MMP12       | NM_002417.2              | Hs00159178_m1 |                                    |
| MMP13       | NM_002418.1              | Hs00233992_m1 |                                    |
| MMP14       | NM_004986.1              | Hs00237119_m1 |                                    |
| MMP15       | NM_002419.1              | Hs00233997_m1 |                                    |
| MMP16       | NM_005932.2              | Hs00234676_m1 |                                    |
| MMP17       | NM_057239.4              | Hs00211754_m1 |                                    |
| MMP19       | NM_002420.1              | Hs00275699_m1 |                                    |
| MMP20       | NM_004762.2              | Hs01573770_m1 |                                    |
| MMP21       | NM_147191.1              | Hs00377680_m1 |                                    |
| MMP23B      | NM_006983.1              | Hs04187882_g1 |                                    |
| MMP24       | NM_006690.3              | Hs01084645_m1 |                                    |
| MMP25       | NM_022468.4              | Hs01554789_m1 |                                    |
| MMP26       | NM_021801.3              | Hs00983740_m1 |                                    |
| MMP27       | NM_022122.2              | Hs00223193_m1 |                                    |
| MMP28       | NM_024302.3              | Hs01020031_m1 |                                    |
| IL-20       | NM_018724.3              | Hs00218888_m1 |                                    |
| IL-24       | NM_006850.3              | Hs01114274_m1 |                                    |
| IL-20R1     | NM_014432.2              | Hs00205346_m1 |                                    |
| IL-20R2     | NM_144717.3              | Hs00376373_m1 |                                    |
| IL-22RA1    | NM_021258.3              | Hs00222035_m1 |                                    |

All primers and probes were purchased from Applied Biosystems

**Table S8. Antibodies used for immunohistochemistry**

| Antigen | Manufacturer | Clone  | Iso type | Dilution |
|---------|--------------|--------|----------|----------|
| MMP1    | abcam        | SB12e  | IgG2b    | 1:100    |
| MMP3    | abcam        | SB14d  | IgG1     | 1:50     |
| MMP7    | abcam        | ID2    | IgG2b    | 1:20     |
| MMP10   | abcam        | 5E4    | IgG1     | 1:25     |
| IL24    | R&D systems  | 283123 | IgG2b    | 1:100    |

All antibodies used in this experiment were mouse monoclonal.

Figure S1

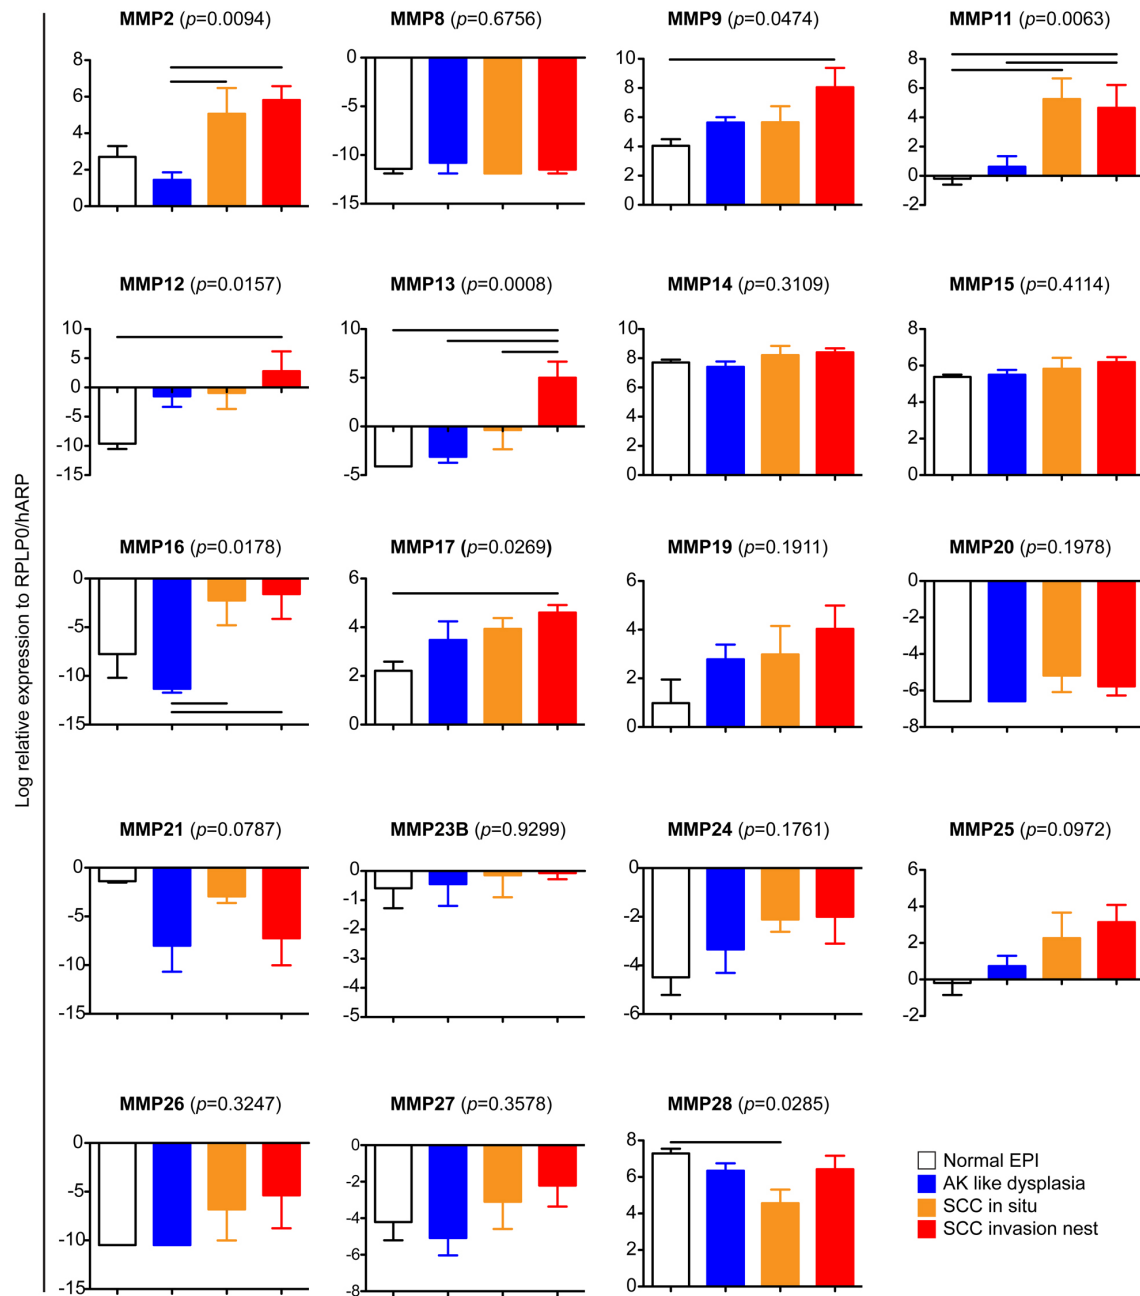**Figure S1. MMP expression across regions in SCC.**

mRNA expression levels of MMPs were examined by preamplification qRT-PCR across microdissected tissues from cutaneous SCC. A  $p$  value for each MMP was obtained among four regions using one-way ANOVA with Tukey's correction. The resultant  $p$  values are shown in parentheses. A line between two bar indicates statistical significance between two regions.

## Figure S2

### Correlation of FCH between gene chip and pre-amp RT-PCR

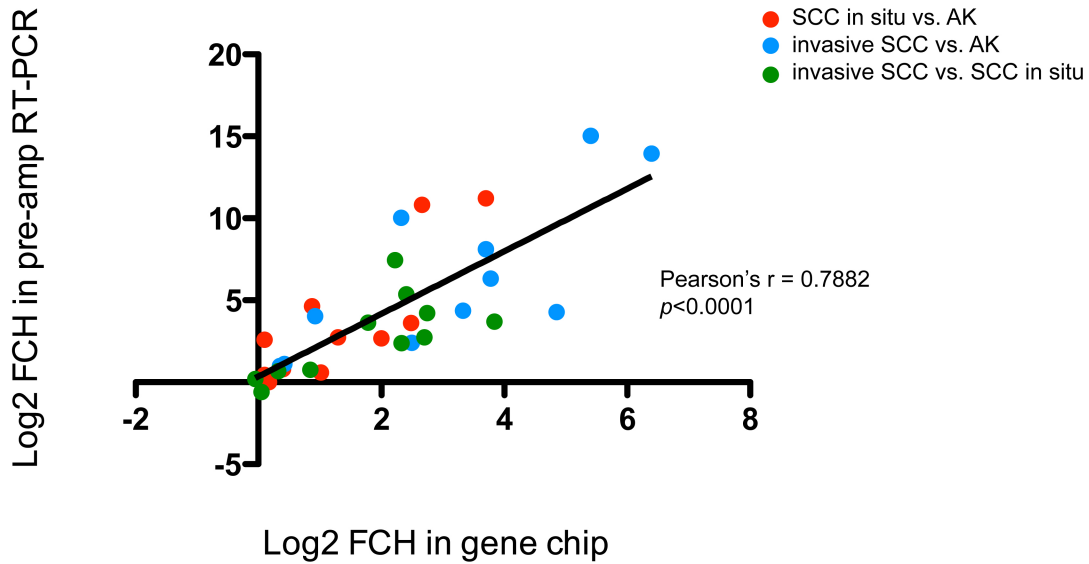

#### Figure S2. Correlation of FCH between genechip and pre-amp RT-PCR

FCH in  $\text{Log}_2$  obtained from cDNA microarray (x-axis) and pre-amplification RT-PCR (y-axis) was correlated as evidenced by Pearson's  $r=0.7882$  ( $p<0.0001$ ), when the 11 genes detected in both methods were compared [33 dots from three comparisons (AK vs. SCC in situ, invasive SCC vs. AK, and invasive SCC vs. SCC in situ) for 11 targets].

Figure S3.

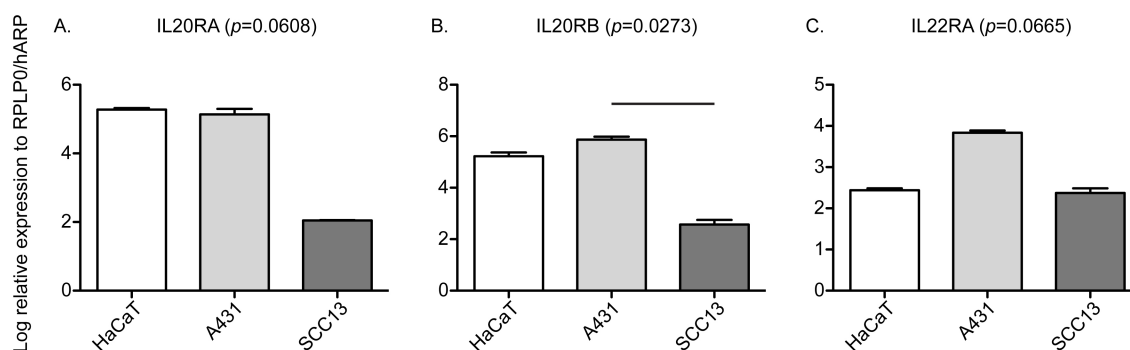

**Figure S3. *IL-24* receptor subunits expression in the three cell lines.** mRNA expression of *IL-24* receptor subunits [(A) *IL20RA*, (B) *IL20RB*, and (C) *IL22RA*] were examined in the three cell lines (HaCaT, A431, and SCC13 cells). Total RNA was extracted from the cells treated with PBS for 4 hours. A  $p$  value for each receptor was obtained among the three cell types using repeated measures ANOVA with Tukey's correction. The resultant  $p$  values are shown in parentheses. A line between two bar indicates statistical significance between two cell types.



**Figure S4.**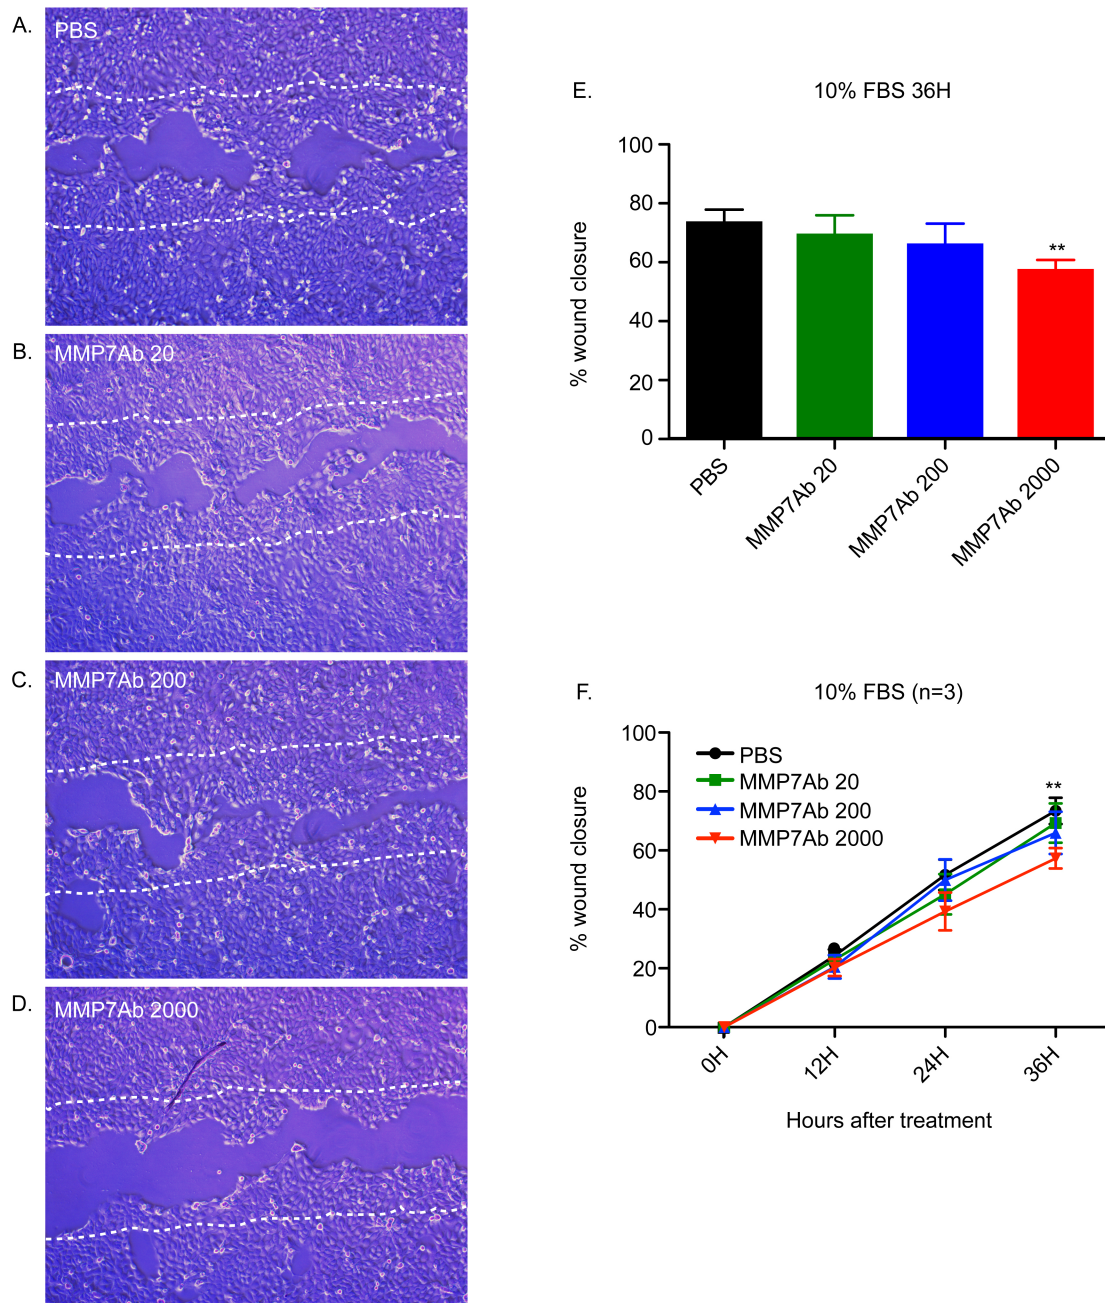**Figure S4. Blocking of MMP7 delayed the wound closure of A431 cells.**

Scratch was made on A431 cells at 90% confluence and cells were cultured in 10%FBS containing media with or without indicated concentrations of anti MMP7 antibody (MMP7Ab) for 36 hours. Cells were photographed every 12 hours. (A-D) Representative images of wound after a 36 hour cultivation with (A) PBS, (B) 20ng/ml of MMP7Ab, (C) 200ng/ml of MMP7Ab, and (D) 2000ng/ml of MMP7Ab. Two white dotted lines depict the initial area of scratch. (E) The bar graph shows

mean of percent wound closure for each treatment after 36 hours. (F) The graph depicts the chronological change of the percent wound closure for each condition. An error bar shows SEM (n=3). \*\*;  $p < 0.01$  between MMP7Ab2000 vs. PBS, MMP7Ab20, and MMP7Ab200 for a 36H treatment (repeated measures ANOVA with Tukey's correction).

**Table S1. Invasion signature gene set of cutaneous SCC (FCH>3.0 and FDR<0.05)**  
383 up- and 354 down-regulated probesets

| Probe       | Symbol   | Description       | FCH-AK vs NormalEpidermis | IgFCH-AK vs NormalEpidermis | P-AK vs NormalEpidermis | fdr-AK vs NormalEpidermis | Status-AK vs NormalEpidermis | FCH-SCCinSitu vs NormalEpidermis | IgFCH-SCCinSitu vs NormalEpidermis | P-SCCinSitu vs NormalEpidermis | fdr-SCCinSitu vs NormalEpidermis | Status-SCCinSitu vs NormalEpidermis | FCH-SCCinvasive vs NormalEpidermis | IgFCH-SCCinvasive vs NormalEpidermis | P-SCCinvasive vs NormalEpidermis | fdr-SCCinvasive vs NormalEpidermis | Status-SCCinvasive vs NormalEpidermis |
|-------------|----------|-------------------|---------------------------|-----------------------------|-------------------------|---------------------------|------------------------------|----------------------------------|------------------------------------|--------------------------------|----------------------------------|-------------------------------------|------------------------------------|--------------------------------------|----------------------------------|------------------------------------|---------------------------------------|
| 213256_at   | 3-Mar    | membrane-asso     | 0.72                      | -0.47                       | 0.42                    | 0.53                      | 0                            | 0.43                             | -1.23                              | 0.04                           | 0.06                             | 0                                   | 0.21                               | -2.27                                | 0.00                             | 0.00                               | -1                                    |
| 200778_s_at | 2-Sep    | septin 2          | 1.75                      | 0.81                        | 0.02                    | 0.05                      | 0                            | 2.52                             | 1.34                               | 0.00                           | 0.00                             | 0                                   | 3.09                               | 1.63                                 | 0.00                             | 0.00                               | 1                                     |
| 208999_at   | 8-Sep    | septin 8          | 0.48                      | -1.07                       | 0.00                    | 0.00                      | 0                            | 0.43                             | -1.21                              | 0.00                           | 0.00                             | 0                                   | 0.30                               | -1.74                                | 0.00                             | 0.00                               | -1                                    |
| 201307_at   | 11-Sep   | septin 11         | 1.27                      | 0.34                        | 0.59                    | 0.69                      | 0                            | 1.85                             | 0.89                               | 0.16                           | 0.24                             | 0                                   | 3.25                               | 1.70                                 | 0.01                             | 0.01                               | 1                                     |
| 205969_at   | AADAC    | arylacetamide de  | 1.34                      | 0.42                        | 0.43                    | 0.54                      | 0                            | 0.47                             | -1.09                              | 0.05                           | 0.08                             | 0                                   | 0.16                               | -2.62                                | 0.00                             | 0.00                               | -1                                    |
| 203504_s_at | ABCA1    | ATP-binding cas   | 0.38                      | -1.39                       | 0.00                    | 0.00                      | 0                            | 0.45                             | -1.15                              | 0.01                           | 0.01                             | 0                                   | 0.28                               | -1.82                                | 0.00                             | 0.00                               | -1                                    |
| 205142_x_at | ABCD1    | ATP-binding cas   | 2.05                      | 1.04                        | 0.00                    | 0.00                      | 0                            | 2.63                             | 1.40                               | 0.00                           | 0.00                             | 0                                   | 3.21                               | 1.68                                 | 0.00                             | 0.00                               | 1                                     |
| 202850_at   | ABCD3    | ATP-binding cas   | 0.54                      | -0.88                       | 0.00                    | 0.00                      | 0                            | 0.42                             | -1.26                              | 0.00                           | 0.00                             | 0                                   | 0.28                               | -1.84                                | 0.00                             | 0.00                               | -1                                    |
| 203981_s_at | ABCD4    | ATP-binding cas   | 0.35                      | -1.52                       | 0.00                    | 0.00                      | 0                            | 0.36                             | -1.48                              | 0.00                           | 0.00                             | 0                                   | 0.33                               | -1.61                                | 0.00                             | 0.00                               | -1                                    |
| 209028_s_at | ABI1     | abl-interactor 1  | 0.39                      | -1.34                       | 0.00                    | 0.00                      | 0                            | 0.37                             | -1.45                              | 0.00                           | 0.00                             | 0                                   | 0.31                               | -1.69                                | 0.00                             | 0.00                               | -1                                    |
| 221641_s_at | ACOT9    | acyl-CoA thioest  | 0.89                      | -0.17                       | 0.61                    | 0.70                      | 0                            | 1.38                             | 0.46                               | 0.16                           | 0.23                             | 0                                   | 3.67                               | 1.88                                 | 0.00                             | 0.00                               | 1                                     |
| 206465_at   | ACSBG1   | acyl-CoA synthe   | 0.93                      | -0.10                       | 0.84                    | 0.89                      | 0                            | 0.38                             | -1.41                              | 0.01                           | 0.02                             | 0                                   | 0.15                               | -2.71                                | 0.00                             | 0.00                               | -1                                    |
| 220705_s_at | ADAMT5   | ADAM metallope    | 2.06                      | 1.04                        | 0.00                    | 0.00                      | 0                            | 2.41                             | 1.27                               | 0.00                           | 0.00                             | 0                                   | 3.04                               | 1.60                                 | 0.00                             | 0.00                               | 1                                     |
| 213217_at   | ADCY2    | adenylate cyclas  | 0.98                      | -0.03                       | 0.96                    | 0.97                      | 0                            | 0.36                             | -1.46                              | 0.03                           | 0.05                             | 0                                   | 0.18                               | -2.51                                | 0.00                             | 0.00                               | -1                                    |
| 202912_at   | ADM      | adrenomedullin    | 2.83                      | 1.50                        | 0.00                    | 0.00                      | 0                            | 2.69                             | 1.43                               | 0.01                           | 0.01                             | 0                                   | 4.52                               | 2.18                                 | 0.00                             | 0.00                               | 1                                     |
| 222362_at   | AGFG2    | ArfGAP with FG    | 0.80                      | -0.33                       | 0.26                    | 0.36                      | 0                            | 0.34                             | -1.55                              | 0.00                           | 0.00                             | 0                                   | 0.27                               | -1.88                                | 0.00                             | 0.00                               | -1                                    |
| 219693_at   | AGPAT4   | 1-acylglycerol-3- | 1.97                      | 0.98                        | 0.00                    | 0.00                      | 0                            | 2.94                             | 1.56                               | 0.00                           | 0.00                             | 0                                   | 3.01                               | 1.59                                 | 0.00                             | 0.00                               | 1                                     |
| 209901_x_at | AIF1     | allograft inflamm | 2.34                      | 1.23                        | 0.00                    | 0.00                      | 0                            | 2.05                             | 1.04                               | 0.00                           | 0.00                             | 0                                   | 3.16                               | 1.66                                 | 0.00                             | 0.00                               | 1                                     |
| 206513_at   | AIM2     | absent in melanc  | 1.80                      | 0.85                        | 0.24                    | 0.34                      | 0                            | 2.72                             | 1.44                               | 0.05                           | 0.08                             | 0                                   | 14.61                              | 3.87                                 | 0.00                             | 0.00                               | 1                                     |
| 215789_s_at | AJAP1    | adherens junctio  | 1.63                      | 0.71                        | 0.06                    | 0.11                      | 0                            | 2.45                             | 1.30                               | 0.00                           | 0.00                             | 0                                   | 4.85                               | 2.28                                 | 0.00                             | 0.00                               | 1                                     |
| 206460_at   | AJAP1    | adherens junctio  | 1.17                      | 0.23                        | 0.44                    | 0.55                      | 0                            | 1.93                             | 0.95                               | 0.00                           | 0.00                             | 0                                   | 3.18                               | 1.67                                 | 0.00                             | 0.00                               | 1                                     |
| 208967_s_at | AK2      | adenylate kinase  | 2.09                      | 1.06                        | 0.00                    | 0.00                      | 0                            | 2.83                             | 1.50                               | 0.00                           | 0.00                             | 0                                   | 3.15                               | 1.66                                 | 0.00                             | 0.00                               | 1                                     |
| 208325_s_at | AKAP13   | A kinase (PRKA)   | 0.41                      | -1.30                       | 0.03                    | 0.05                      | 0                            | 0.34                             | -1.57                              | 0.01                           | 0.01                             | 0                                   | 0.30                               | -1.73                                | 0.00                             | 0.00                               | -1                                    |
| 201272_at   | AKR1B1   | aldo-keto reduct  | 2.17                      | 1.12                        | 0.01                    | 0.01                      | 0                            | 2.95                             | 1.56                               | 0.00                           | 0.00                             | 0                                   | 3.04                               | 1.61                                 | 0.00                             | 0.00                               | 1                                     |
| 218487_at   | ALAD     | aminolevulinate,  | 0.59                      | -0.77                       | 0.00                    | 0.00                      | 0                            | 0.42                             | -1.26                              | 0.00                           | 0.00                             | 0                                   | 0.33                               | -1.59                                | 0.00                             | 0.00                               | -1                                    |
| 205633_s_at | ALAS1    | aminolevulinate,  | 2.20                      | 1.14                        | 0.00                    | 0.00                      | 0                            | 2.45                             | 1.29                               | 0.00                           | 0.00                             | 0                                   | 3.36                               | 1.75                                 | 0.00                             | 0.00                               | 1                                     |
| 217791_s_at | ALDH18A1 | aldehyde dehydr   | 2.78                      | 1.48                        | 0.00                    | 0.00                      | 0                            | 2.74                             | 1.45                               | 0.00                           | 0.00                             | 0                                   | 3.29                               | 1.72                                 | 0.00                             | 0.00                               | 1                                     |
| 203180_at   | ALDH1A3  | aldehyde dehydr   | 0.75                      | -0.42                       | 0.51                    | 0.61                      | 0                            | 0.75                             | -0.41                              | 0.52                           | 0.60                             | 0                                   | 4.38                               | 2.13                                 | 0.00                             | 0.00                               | 1                                     |
| 202053_s_at | ALDH3A2  | aldehyde dehydr   | 0.72                      | -0.48                       | 0.20                    | 0.30                      | 0                            | 0.40                             | -1.34                              | 0.00                           | 0.00                             | 0                                   | 0.23                               | -2.13                                | 0.00                             | 0.00                               | -1                                    |
| 203608_at   | ALDH5A1  | aldehyde dehydr   | 0.93                      | -0.10                       | 0.85                    | 0.89                      | 0                            | 0.34                             | -1.54                              | 0.01                           | 0.01                             | 0                                   | 0.20                               | -2.33                                | 0.00                             | 0.00                               | -1                                    |
| 220148_at   | ALDH8A1  | aldehyde dehydr   | 0.46                      | -1.12                       | 0.07                    | 0.12                      | 0                            | 0.35                             | -1.50                              | 0.02                           | 0.03                             | 0                                   | 0.26                               | -1.96                                | 0.00                             | 0.00                               | -1                                    |
| 207206_s_at | ALOX12   | arachidonate 12-  | 1.26                      | 0.34                        | 0.36                    | 0.47                      | 0                            | 0.38                             | -1.40                              | 0.00                           | 0.00                             | 0                                   | 0.14                               | -2.84                                | 0.00                             | 0.00                               | -1                                    |
| 201196_s_at | AMD1     | adenosylmethior   | 2.73                      | 1.45                        | 0.00                    | 0.00                      | 0                            | 2.77                             | 1.47                               | 0.00                           | 0.00                             | 0                                   | 3.15                               | 1.66                                 | 0.00                             | 0.00                               | 1                                     |

|             |          |                    |      |       |      |      |   |      |       |      |      |   |      |       |      |      |    |
|-------------|----------|--------------------|------|-------|------|------|---|------|-------|------|------|---|------|-------|------|------|----|
| 221825_at   | ANGEL2   | angel homolog 2    | 0.58 | -0.80 | 0.00 | 0.00 | 0 | 0.37 | -1.42 | 0.00 | 0.00 | 0 | 0.33 | -1.60 | 0.00 | 0.00 | -1 |
| 212289_at   | ANKRD12  | ankyrin repeat d   | 0.57 | -0.82 | 0.01 | 0.01 | 0 | 0.40 | -1.33 | 0.00 | 0.00 | 0 | 0.31 | -1.68 | 0.00 | 0.00 | -1 |
| 216563_at   | ANKRD12  | ankyrin repeat d   | 0.46 | -1.13 | 0.01 | 0.01 | 0 | 0.34 | -1.56 | 0.00 | 0.00 | 0 | 0.27 | -1.88 | 0.00 | 0.00 | -1 |
| 201012_at   | ANXA1    | annexin A1         | 0.93 | -0.10 | 0.81 | 0.86 | 0 | 2.45 | 1.29  | 0.00 | 0.00 | 0 | 4.35 | 2.12  | 0.00 | 0.00 | 1  |
| 211712_s_at | ANXA9    | annexin A9         | 1.17 | 0.23  | 0.74 | 0.81 | 0 | 0.54 | -0.90 | 0.19 | 0.26 | 0 | 0.13 | -2.95 | 0.00 | 0.00 | -1 |
| 214875_x_at | APLP2    | amyloid beta (A4   | 1.94 | 0.95  | 0.02 | 0.04 | 0 | 2.88 | 1.53  | 0.00 | 0.00 | 0 | 3.58 | 1.84  | 0.00 | 0.00 | 1  |
| 204205_at   | APOBEC3G | apolipoprotein B   | 2.45 | 1.29  | 0.02 | 0.03 | 0 | 2.55 | 1.35  | 0.01 | 0.02 | 0 | 6.96 | 2.80  | 0.00 | 0.00 | 1  |
| 212583_at   | AQR      | aquarius homolo    | 0.37 | -1.42 | 0.00 | 0.00 | 0 | 0.54 | -0.89 | 0.02 | 0.03 | 0 | 0.30 | -1.76 | 0.00 | 0.00 | -1 |
| 221030_s_at | ARHGAP24 | Rho GTPase act     | 0.54 | -0.90 | 0.01 | 0.02 | 0 | 0.39 | -1.36 | 0.00 | 0.00 | 0 | 0.30 | -1.72 | 0.00 | 0.00 | -1 |
| 203910_at   | ARHGAP29 | Rho GTPase act     | 0.84 | -0.25 | 0.64 | 0.73 | 0 | 0.45 | -1.15 | 0.03 | 0.06 | 0 | 0.20 | -2.33 | 0.00 | 0.00 | -1 |
| 202208_s_at | ARL4C    | ADP-ribosylation   | 1.91 | 0.93  | 0.01 | 0.01 | 0 | 1.92 | 0.94  | 0.01 | 0.01 | 0 | 3.36 | 1.75  | 0.00 | 0.00 | 1  |
| 210980_s_at | ASAH1    | N-acylsphingosir   | 0.59 | -0.76 | 0.00 | 0.00 | 0 | 0.42 | -1.27 | 0.00 | 0.00 | 0 | 0.33 | -1.60 | 0.00 | 0.00 | -1 |
| 219103_at   | ASAP3    | ArfGAP with SH3    | 0.59 | -0.76 | 0.08 | 0.13 | 0 | 0.36 | -1.48 | 0.00 | 0.00 | 0 | 0.18 | -2.44 | 0.00 | 0.00 | -1 |
| 219918_s_at | ASPM     | asp (abnormal sj   | 0.59 | -0.76 | 0.23 | 0.33 | 0 | 0.37 | -1.43 | 0.03 | 0.05 | 0 | 0.33 | -1.62 | 0.01 | 0.02 | -1 |
| 217550_at   | ATF6     | activating transcr | 0.35 | -1.50 | 0.00 | 0.00 | 0 | 0.44 | -1.20 | 0.00 | 0.00 | 0 | 0.30 | -1.76 | 0.00 | 0.00 | -1 |
| 220920_at   | ATP10B   | ATPase, class V    | 1.40 | 0.49  | 0.23 | 0.34 | 0 | 0.69 | -0.54 | 0.19 | 0.26 | 0 | 0.27 | -1.87 | 0.00 | 0.00 | -1 |
| 201243_s_at | ATP1B1   | ATPase, Na+/K+     | 1.68 | 0.75  | 0.21 | 0.31 | 0 | 2.08 | 1.05  | 0.08 | 0.13 | 0 | 3.34 | 1.74  | 0.01 | 0.01 | 1  |
| 209281_s_at | ATP2B1   | ATPase, Ca++ tr    | 0.36 | -1.47 | 0.00 | 0.00 | 0 | 0.42 | -1.24 | 0.00 | 0.00 | 0 | 0.30 | -1.75 | 0.00 | 0.00 | -1 |
| 206043_s_at | ATP2C2   | ATPase, Ca++ tr    | 1.09 | 0.13  | 0.75 | 0.82 | 0 | 0.87 | -0.20 | 0.63 | 0.70 | 0 | 0.22 | -2.18 | 0.00 | 0.00 | -1 |
| 217603_at   | ATP6V0A2 | ATPase, H+ tran    | 0.47 | -1.09 | 0.03 | 0.06 | 0 | 0.35 | -1.53 | 0.00 | 0.00 | 0 | 0.28 | -1.86 | 0.00 | 0.00 | -1 |
| 200078_s_at | ATP6V0B  | ATPase, H+ tran    | 2.65 | 1.41  | 0.00 | 0.00 | 0 | 2.54 | 1.34  | 0.00 | 0.00 | 0 | 3.32 | 1.73  | 0.00 | 0.00 | 1  |
| 213587_s_at | ATP6V0E2 | ATPase, H+ tran    | 0.80 | -0.32 | 0.45 | 0.55 | 0 | 0.38 | -1.39 | 0.00 | 0.00 | 0 | 0.17 | -2.59 | 0.00 | 0.00 | -1 |
| 205197_s_at | ATP7A    | ATPase, Cu++ tr    | 0.52 | -0.94 | 0.00 | 0.00 | 0 | 0.81 | -0.31 | 0.31 | 0.39 | 0 | 0.22 | -2.21 | 0.00 | 0.00 | -1 |
| 208859_s_at | ATRX     | alpha thalassem    | 0.36 | -1.49 | 0.00 | 0.00 | 0 | 0.39 | -1.37 | 0.00 | 0.00 | 0 | 0.31 | -1.69 | 0.00 | 0.00 | -1 |
| 208860_s_at | ATRX     | alpha thalassem    | 0.43 | -1.20 | 0.01 | 0.01 | 0 | 0.51 | -0.98 | 0.02 | 0.04 | 0 | 0.27 | -1.89 | 0.00 | 0.00 | -1 |
| 213589_s_at | B3GNTL1  | UDP-GlcNAc:bet     | 0.67 | -0.58 | 0.04 | 0.08 | 0 | 0.51 | -0.96 | 0.00 | 0.00 | 0 | 0.25 | -1.98 | 0.00 | 0.00 | -1 |
| 210540_s_at | B4GALT4  | UDP-Gal:betaGlc    | 0.34 | -1.57 | 0.00 | 0.00 | 0 | 0.39 | -1.35 | 0.00 | 0.00 | 0 | 0.29 | -1.79 | 0.00 | 0.00 | -1 |
| 203728_at   | BAK1     | BCL2-antagonist    | 2.20 | 1.14  | 0.00 | 0.00 | 0 | 2.18 | 1.13  | 0.00 | 0.00 | 0 | 3.55 | 1.83  | 0.00 | 0.00 | 1  |
| 219498_s_at | BCL11A   | B-cell CLL/lymph   | 0.76 | -0.40 | 0.31 | 0.42 | 0 | 0.38 | -1.40 | 0.00 | 0.00 | 0 | 0.23 | -2.11 | 0.00 | 0.00 | -1 |
| 219497_s_at | BCL11A   | B-cell CLL/lymph   | 0.65 | -0.62 | 0.19 | 0.28 | 0 | 0.34 | -1.57 | 0.00 | 0.00 | 0 | 0.20 | -2.36 | 0.00 | 0.00 | -1 |
| 203140_at   | BCL6     | B-cell CLL/lymph   | 0.52 | -0.96 | 0.00 | 0.00 | 0 | 0.36 | -1.48 | 0.00 | 0.00 | 0 | 0.32 | -1.66 | 0.00 | 0.00 | -1 |
| 214499_s_at | BCLAF1   | BCL2-associatex    | 0.47 | -1.10 | 0.01 | 0.01 | 0 | 0.34 | -1.55 | 0.00 | 0.00 | 0 | 0.27 | -1.89 | 0.00 | 0.00 | -1 |
| 205870_at   | BDKRB2   | bradykinin recep   | 1.87 | 0.90  | 0.04 | 0.08 | 0 | 2.19 | 1.13  | 0.01 | 0.02 | 0 | 3.28 | 1.71  | 0.00 | 0.00 | 1  |
| 215440_s_at | BEX4     | brain expressed,   | 0.84 | -0.26 | 0.71 | 0.78 | 0 | 0.46 | -1.13 | 0.10 | 0.15 | 0 | 0.19 | -2.42 | 0.00 | 0.00 | -1 |
| 213709_at   | BHLHB9   | basic helix-loop-l | 0.36 | -1.46 | 0.00 | 0.00 | 0 | 0.35 | -1.52 | 0.00 | 0.00 | 0 | 0.33 | -1.59 | 0.00 | 0.00 | -1 |
| 206119_at   | BHMT     | betaine-homocys    | 2.46 | 1.30  | 0.00 | 0.00 | 0 | 2.49 | 1.32  | 0.00 | 0.00 | 0 | 3.06 | 1.61  | 0.00 | 0.00 | 1  |
| 210201_x_at | BIN1     | bridging integrat  | 2.40 | 1.26  | 0.00 | 0.00 | 0 | 2.97 | 1.57  | 0.00 | 0.00 | 0 | 3.72 | 1.89  | 0.00 | 0.00 | 1  |
| 202179_at   | BLMH     | bleomycin hydro    | 2.09 | 1.06  | 0.04 | 0.08 | 0 | 0.65 | -0.62 | 0.23 | 0.32 | 0 | 0.21 | -2.25 | 0.00 | 0.00 | -1 |
| 205574_x_at | BMP1     | bone morphogere    | 1.42 | 0.50  | 0.18 | 0.27 | 0 | 1.54 | 0.63  | 0.10 | 0.15 | 0 | 3.11 | 1.64  | 0.00 | 0.00 | 1  |
| 207595_s_at | BMP1     | bone morphogere    | 1.52 | 0.60  | 0.00 | 0.01 | 0 | 1.94 | 0.96  | 0.00 | 0.00 | 0 | 3.10 | 1.63  | 0.00 | 0.00 | 1  |
| 209591_s_at | BMP7     | bone morphogere    | 0.77 | -0.38 | 0.47 | 0.58 | 0 | 0.59 | -0.76 | 0.16 | 0.22 | 0 | 0.25 | -2.01 | 0.00 | 0.00 | -1 |
| 203502_at   | BPGM     | 2,3-bisphosphog    | 1.42 | 0.51  | 0.24 | 0.34 | 0 | 2.17 | 1.11  | 0.01 | 0.02 | 0 | 3.93 | 1.97  | 0.00 | 0.00 | 1  |
| 208677_s_at | BSG      | basigin (Ok bloo   | 1.05 | 0.06  | 0.82 | 0.87 | 0 | 2.36 | 1.24  | 0.00 | 0.00 | 0 | 3.23 | 1.69  | 0.00 | 0.00 | 1  |
| 202946_s_at | BTBD3    | BTB (POZ) domi     | 0.38 | -1.41 | 0.00 | 0.00 | 0 | 0.35 | -1.51 | 0.00 | 0.00 | 0 | 0.27 | -1.89 | 0.00 | 0.00 | -1 |
| 204821_at   | BTN3A3   | butyrophilin, sub  | 0.40 | -1.34 | 0.01 | 0.01 | 0 | 0.40 | -1.34 | 0.01 | 0.01 | 0 | 0.29 | -1.76 | 0.00 | 0.00 | -1 |
| 209183_s_at | C10orf10 | chromosome 10      | 1.14 | 0.19  | 0.74 | 0.81 | 0 | 2.48 | 1.31  | 0.02 | 0.04 | 0 | 3.31 | 1.73  | 0.00 | 0.00 | 1  |
| 219953_s_at | C11orf17 | chromosome 11      | 0.93 | -0.11 | 0.70 | 0.78 | 0 | 2.27 | 1.19  | 0.00 | 0.00 | 0 | 4.33 | 2.11  | 0.00 | 0.00 | 1  |
| 218789_s_at | C11orf71 | chromosome 11      | 0.54 | -0.89 | 0.04 | 0.07 | 0 | 0.42 | -1.24 | 0.00 | 0.00 | 0 | 0.22 | -2.16 | 0.00 | 0.00 | -1 |

|             |           |                    |      |       |      |      |   |      |       |      |      |   |      |       |      |      |    |
|-------------|-----------|--------------------|------|-------|------|------|---|------|-------|------|------|---|------|-------|------|------|----|
| 218060_s_at | C16orf57  | chromosome 16      | 1.36 | 0.45  | 0.03 | 0.06 | 0 | 2.29 | 1.20  | 0.00 | 0.00 | 0 | 3.18 | 1.67  | 0.00 | 0.00 | 1  |
| 221621_at   | C17orf86  | chromosome 17      | 0.49 | -1.04 | 0.00 | 0.00 | 0 | 0.38 | -1.41 | 0.00 | 0.00 | 0 | 0.29 | -1.81 | 0.00 | 0.00 | -1 |
| 207996_s_at | C18orf1   | chromosome 18      | 0.87 | -0.20 | 0.71 | 0.79 | 0 | 1.92 | 0.94  | 0.09 | 0.14 | 0 | 5.81 | 2.54  | 0.00 | 0.00 | 1  |
| 218712_at   | C1orf109  | chromosome 1 c     | 0.36 | -1.47 | 0.00 | 0.00 | 0 | 0.38 | -1.42 | 0.00 | 0.00 | 0 | 0.23 | -2.11 | 0.00 | 0.00 | -1 |
| 220011_at   | C1orf135  | chromosome 1 c     | 1.76 | 0.81  | 0.01 | 0.03 | 0 | 2.92 | 1.54  | 0.00 | 0.00 | 0 | 3.24 | 1.70  | 0.00 | 0.00 | 1  |
| 216935_at   | C1orf46   | chromosome 1 c     | 1.16 | 0.21  | 0.77 | 0.83 | 0 | 0.41 | -1.29 | 0.08 | 0.12 | 0 | 0.20 | -2.30 | 0.00 | 0.00 | -1 |
| 217087_at   | C1orf68   | chromosome 1 c     | 2.04 | 1.03  | 0.11 | 0.17 | 0 | 0.46 | -1.11 | 0.08 | 0.13 | 0 | 0.26 | -1.95 | 0.00 | 0.00 | -1 |
| 203052_at   | C2        | complement corr    | 2.27 | 1.18  | 0.00 | 0.00 | 0 | 2.79 | 1.48  | 0.00 | 0.00 | 0 | 3.18 | 1.67  | 0.00 | 0.00 | 1  |
| 219463_at   | C20orf103 | chromosome 20      | 1.36 | 0.44  | 0.32 | 0.43 | 0 | 1.87 | 0.90  | 0.05 | 0.08 | 0 | 3.60 | 1.85  | 0.00 | 0.00 | 1  |
| 215852_x_at | C20orf117 | chromosome 20      | 0.36 | -1.46 | 0.00 | 0.00 | 0 | 0.34 | -1.58 | 0.00 | 0.00 | 0 | 0.33 | -1.61 | 0.00 | 0.00 | -1 |
| 217835_x_at | C20orf24  | chromosome 20      | 1.89 | 0.92  | 0.00 | 0.00 | 0 | 2.94 | 1.55  | 0.00 | 0.00 | 0 | 3.13 | 1.65  | 0.00 | 0.00 | 1  |
| 219706_at   | C20orf29  | chromosome 20      | 1.81 | 0.86  | 0.00 | 0.00 | 0 | 2.82 | 1.50  | 0.00 | 0.00 | 0 | 3.37 | 1.75  | 0.00 | 0.00 | 1  |
| 221878_at   | C2orf68   | chromosome 2 c     | 0.35 | -1.51 | 0.00 | 0.00 | 0 | 0.41 | -1.29 | 0.00 | 0.00 | 0 | 0.20 | -2.31 | 0.00 | 0.00 | -1 |
| 209285_s_at | C3orf63   | chromosome 3 c     | 0.49 | -1.04 | 0.00 | 0.00 | 0 | 0.34 | -1.54 | 0.00 | 0.00 | 0 | 0.33 | -1.62 | 0.00 | 0.00 | -1 |
| 219655_at   | C7orf10   | chromosome 7 c     | 2.02 | 1.01  | 0.01 | 0.01 | 0 | 2.81 | 1.49  | 0.00 | 0.00 | 0 | 4.29 | 2.10  | 0.00 | 0.00 | 1  |
| 61874_at    | C9orf7    | chromosome 9 c     | 2.57 | 1.36  | 0.00 | 0.00 | 0 | 2.75 | 1.46  | 0.00 | 0.00 | 0 | 3.02 | 1.60  | 0.00 | 0.00 | 1  |
| 209030_s_at | CADM1     | cell adhesion mc   | 1.32 | 0.40  | 0.38 | 0.49 | 0 | 0.63 | -0.66 | 0.16 | 0.23 | 0 | 0.30 | -1.72 | 0.00 | 0.00 | -1 |
| 205428_s_at | CALB2     | calbindin 2        | 0.94 | -0.09 | 0.85 | 0.89 | 0 | 2.89 | 1.53  | 0.00 | 0.00 | 0 | 4.94 | 2.30  | 0.00 | 0.00 | 1  |
| 221565_s_at | CALHM2    | calcium homeos     | 2.10 | 1.07  | 0.00 | 0.00 | 0 | 2.79 | 1.48  | 0.00 | 0.00 | 0 | 3.42 | 1.78  | 0.00 | 0.00 | 1  |
| 218309_at   | CAMK2N1   | calcium/calmodu    | 1.27 | 0.35  | 0.53 | 0.64 | 0 | 1.14 | 0.19  | 0.74 | 0.79 | 0 | 6.00 | 2.59  | 0.00 | 0.00 | 1  |
| 213547_at   | CAND2     | cullin-associated  | 0.49 | -1.04 | 0.05 | 0.09 | 0 | 0.63 | -0.66 | 0.21 | 0.28 | 0 | 0.23 | -2.16 | 0.00 | 0.00 | -1 |
| 221732_at   | CANT1     | calcium activate   | 1.92 | 0.94  | 0.00 | 0.00 | 0 | 2.32 | 1.22  | 0.00 | 0.00 | 0 | 3.08 | 1.62  | 0.00 | 0.00 | 1  |
| 200625_s_at | CAP1      | CAP, adenylate     | 1.62 | 0.70  | 0.01 | 0.01 | 0 | 2.89 | 1.53  | 0.00 | 0.00 | 0 | 3.36 | 1.75  | 0.00 | 0.00 | 1  |
| 203356_at   | CAPN7     | calpain 7          | 0.36 | -1.48 | 0.00 | 0.00 | 0 | 0.41 | -1.28 | 0.00 | 0.00 | 0 | 0.30 | -1.76 | 0.00 | 0.00 | -1 |
| 203357_s_at | CAPN7     | calpain 7          | 0.47 | -1.08 | 0.01 | 0.02 | 0 | 0.78 | -0.37 | 0.37 | 0.46 | 0 | 0.29 | -1.81 | 0.00 | 0.00 | -1 |
| 211366_x_at | CASP1     | caspase 1, apop    | 1.44 | 0.53  | 0.21 | 0.31 | 0 | 2.67 | 1.42  | 0.00 | 0.00 | 0 | 3.86 | 1.95  | 0.00 | 0.00 | 1  |
| 211368_s_at | CASP1     | caspase 1, apop    | 1.28 | 0.35  | 0.47 | 0.58 | 0 | 2.34 | 1.23  | 0.02 | 0.03 | 0 | 3.22 | 1.69  | 0.00 | 0.00 | 1  |
| 32128_at    | CCL18     | chemokine (C-C     | 1.55 | 0.63  | 0.35 | 0.46 | 0 | 2.08 | 1.06  | 0.12 | 0.18 | 0 | 3.09 | 1.63  | 0.02 | 0.03 | 1  |
| 204103_at   | CCL4      | chemokine (C-C     | 1.41 | 0.50  | 0.20 | 0.29 | 0 | 1.95 | 0.97  | 0.01 | 0.02 | 0 | 4.13 | 2.05  | 0.00 | 0.00 | 1  |
| 1405_i_at   | CCL5      | chemokine (C-C     | 0.70 | -0.52 | 0.45 | 0.56 | 0 | 2.68 | 1.42  | 0.04 | 0.07 | 0 | 5.61 | 2.49  | 0.00 | 0.00 | 1  |
| 204655_at   | CCL5      | chemokine (C-C     | 0.80 | -0.32 | 0.63 | 0.72 | 0 | 2.14 | 1.09  | 0.11 | 0.16 | 0 | 3.45 | 1.78  | 0.01 | 0.02 | 1  |
| 205034_at   | CCNE2     | cyclin E2          | 0.46 | -1.14 | 0.01 | 0.02 | 0 | 0.37 | -1.44 | 0.00 | 0.00 | 0 | 0.29 | -1.80 | 0.00 | 0.00 | -1 |
| 220351_at   | CCRL1     | chemokine (C-C     | 0.34 | -1.55 | 0.04 | 0.07 | 0 | 0.47 | -1.08 | 0.14 | 0.20 | 0 | 0.30 | -1.72 | 0.02 | 0.03 | -1 |
| 206749_at   | CD1B      | CD1b molecule      | 1.03 | 0.04  | 0.95 | 0.96 | 0 | 1.39 | 0.47  | 0.47 | 0.56 | 0 | 3.49 | 1.81  | 0.01 | 0.01 | 1  |
| 205831_at   | CD2       | CD2 molecule       | 1.15 | 0.20  | 0.66 | 0.74 | 0 | 1.85 | 0.89  | 0.05 | 0.09 | 0 | 3.11 | 1.64  | 0.00 | 0.00 | 1  |
| 213055_at   | CD47      | CD47 molecule      | 1.85 | 0.88  | 0.00 | 0.00 | 0 | 2.32 | 1.21  | 0.00 | 0.00 | 0 | 4.38 | 2.13  | 0.00 | 0.00 | 1  |
| 203416_at   | CD53      | CD53 molecule      | 2.76 | 1.47  | 0.00 | 0.00 | 0 | 1.61 | 0.69  | 0.08 | 0.12 | 0 | 3.25 | 1.70  | 0.00 | 0.00 | 1  |
| 200984_s_at | CD59      | CD59 molecule,     | 1.22 | 0.29  | 0.39 | 0.50 | 0 | 1.61 | 0.68  | 0.05 | 0.08 | 0 | 3.09 | 1.63  | 0.00 | 0.00 | 1  |
| 205988_at   | CD84      | CD84 molecule      | 2.25 | 1.17  | 0.00 | 0.00 | 0 | 2.16 | 1.11  | 0.00 | 0.00 | 0 | 3.40 | 1.77  | 0.00 | 0.00 | 1  |
| 217879_at   | CDC27     | cell division cycl | 0.99 | -0.01 | 0.98 | 0.98 | 0 | 1.58 | 0.66  | 0.06 | 0.10 | 0 | 3.02 | 1.59  | 0.00 | 0.00 | 1  |
| 203252_at   | CDK2AP2   | cyclin-dependen    | 2.07 | 1.05  | 0.00 | 0.00 | 0 | 2.07 | 1.05  | 0.00 | 0.00 | 0 | 3.01 | 1.59  | 0.00 | 0.00 | 1  |
| 209112_at   | CDKN1B    | cyclin-dependen    | 0.38 | -1.41 | 0.00 | 0.00 | 0 | 0.34 | -1.56 | 0.00 | 0.00 | 0 | 0.24 | -2.08 | 0.00 | 0.00 | -1 |
| 209644_x_at | CDKN2A    | cyclin-dependen    | 1.54 | 0.62  | 0.00 | 0.00 | 0 | 2.47 | 1.31  | 0.00 | 0.00 | 0 | 3.98 | 1.99  | 0.00 | 0.00 | 1  |
| 204159_at   | CDKN2C    | cyclin-dependen    | 0.63 | -0.66 | 0.08 | 0.13 | 0 | 0.68 | -0.57 | 0.13 | 0.19 | 0 | 0.31 | -1.70 | 0.00 | 0.00 | -1 |
| 219505_at   | CECR1     | cat eye syndrom    | 2.89 | 1.53  | 0.00 | 0.00 | 0 | 2.47 | 1.30  | 0.00 | 0.00 | 0 | 3.33 | 1.73  | 0.00 | 0.00 | 1  |
| 218827_s_at | CEP192    | centrosomal prol   | 0.47 | -1.10 | 0.00 | 0.00 | 0 | 0.46 | -1.11 | 0.00 | 0.00 | 0 | 0.32 | -1.67 | 0.00 | 0.00 | -1 |
| 203494_s_at | CEP57     | centrosomal prol   | 0.51 | -0.96 | 0.01 | 0.01 | 0 | 0.46 | -1.11 | 0.00 | 0.00 | 0 | 0.26 | -1.96 | 0.00 | 0.00 | -1 |
| 212677_s_at | CEP68     | centrosomal prol   | 0.87 | -0.20 | 0.69 | 0.77 | 0 | 0.43 | -1.23 | 0.02 | 0.03 | 0 | 0.26 | -1.93 | 0.00 | 0.00 | -1 |

|             |          |                               |      |       |      |      |   |      |       |      |      |   |      |       |      |      |    |
|-------------|----------|-------------------------------|------|-------|------|------|---|------|-------|------|------|---|------|-------|------|------|----|
| 52285_f_at  | CEP76    | centrosomal prol              | 0.46 | -1.12 | 0.05 | 0.09 | 0 | 0.40 | -1.31 | 0.02 | 0.04 | 0 | 0.14 | -2.80 | 0.00 | 0.00 | -1 |
| 203975_s_at | CHAF1A   | chromatin assert              | 0.62 | -0.68 | 0.10 | 0.16 | 0 | 0.38 | -1.39 | 0.00 | 0.00 | 0 | 0.29 | -1.80 | 0.00 | 0.00 | -1 |
| 209395_at   | CHI3L1   | chitinase 3-like 1            | 0.76 | -0.40 | 0.65 | 0.73 | 0 | 0.33 | -1.59 | 0.07 | 0.11 | 0 | 0.12 | -3.03 | 0.00 | 0.00 | -1 |
| 219634_at   | CHST11   | carbohydrate (ct              | 1.67 | 0.74  | 0.05 | 0.09 | 0 | 2.52 | 1.34  | 0.00 | 0.00 | 0 | 5.11 | 2.35  | 0.00 | 0.00 | 1  |
| 32094_at    | CHST3    | carbohydrate (ct              | 1.81 | 0.86  | 0.00 | 0.00 | 0 | 2.33 | 1.22  | 0.00 | 0.00 | 0 | 3.47 | 1.80  | 0.00 | 0.00 | 1  |
| 221065_s_at | CHST8    | carbohydrate (N-              | 2.65 | 1.41  | 0.00 | 0.00 | 0 | 2.87 | 1.52  | 0.00 | 0.00 | 0 | 3.12 | 1.64  | 0.00 | 0.00 | 1  |
| 201953_at   | CIB1     | calcium and inte              | 1.40 | 0.49  | 0.08 | 0.14 | 0 | 2.49 | 1.32  | 0.00 | 0.00 | 0 | 4.52 | 2.18  | 0.00 | 0.00 | 1  |
| 209357_at   | CITED2   | Cbp/p300-intera               | 0.77 | -0.38 | 0.37 | 0.48 | 0 | 0.49 | -1.03 | 0.02 | 0.03 | 0 | 0.30 | -1.73 | 0.00 | 0.00 | -1 |
| 207980_s_at | CITED2   | Cbp/p300-intera               | 0.95 | -0.07 | 0.86 | 0.90 | 0 | 0.45 | -1.16 | 0.01 | 0.01 | 0 | 0.29 | -1.80 | 0.00 | 0.00 | -1 |
| 201897_s_at | CKS1B    | CDC28 protein k               | 2.10 | 1.07  | 0.00 | 0.00 | 0 | 2.24 | 1.17  | 0.00 | 0.00 | 0 | 3.05 | 1.61  | 0.00 | 0.00 | 1  |
| 201733_at   | CLCN3    | chloride channel              | 0.40 | -1.31 | 0.00 | 0.00 | 0 | 0.36 | -1.48 | 0.00 | 0.00 | 0 | 0.31 | -1.71 | 0.00 | 0.00 | -1 |
| 202790_at   | CLDN7    | claudin 7                     | 2.90 | 1.54  | 0.00 | 0.00 | 0 | 2.30 | 1.20  | 0.00 | 0.00 | 0 | 4.50 | 2.17  | 0.00 | 0.00 | 1  |
| 201975_at   | CLIP1    | CAP-GLY domai                 | 0.49 | -1.03 | 0.00 | 0.00 | 0 | 0.40 | -1.32 | 0.00 | 0.00 | 0 | 0.33 | -1.60 | 0.00 | 0.00 | -1 |
| 219341_at   | CLN8     | ceroid-lipofuscin             | 0.84 | -0.25 | 0.59 | 0.68 | 0 | 0.67 | -0.57 | 0.22 | 0.30 | 0 | 0.32 | -1.64 | 0.00 | 0.00 | -1 |
| 216293_at   | CLTA     | clathrin, light cha           | 2.50 | 1.32  | 0.00 | 0.00 | 0 | 2.71 | 1.44  | 0.00 | 0.00 | 0 | 3.01 | 1.59  | 0.00 | 0.00 | 1  |
| 205944_s_at | CLTCL1   | clathrin, heavy cl            | 2.03 | 1.02  | 0.00 | 0.00 | 0 | 2.58 | 1.37  | 0.00 | 0.00 | 0 | 3.18 | 1.67  | 0.00 | 0.00 | 1  |
| 203239_s_at | CNOT3    | CCR4-NOT tran                 | 0.42 | -1.26 | 0.00 | 0.00 | 0 | 0.34 | -1.54 | 0.00 | 0.00 | 0 | 0.33 | -1.62 | 0.00 | 0.00 | -1 |
| 204636_at   | COL17A1  | collagen, type X <sup>I</sup> | 1.43 | 0.52  | 0.29 | 0.40 | 0 | 1.55 | 0.63  | 0.20 | 0.27 | 0 | 3.29 | 1.72  | 0.00 | 0.00 | 1  |
| 204724_s_at | COL9A3   | collagen, type IX             | 0.42 | -1.26 | 0.01 | 0.02 | 0 | 0.83 | -0.27 | 0.57 | 0.65 | 0 | 0.33 | -1.60 | 0.00 | 0.00 | -1 |
| 205773_at   | CPEB3    | cytoplasmic poly              | 0.36 | -1.49 | 0.00 | 0.00 | 0 | 0.41 | -1.30 | 0.00 | 0.00 | 0 | 0.30 | -1.75 | 0.00 | 0.00 | -1 |
| 211062_s_at | CPZ      | carboxypeptidas               | 1.51 | 0.59  | 0.23 | 0.34 | 0 | 2.10 | 1.07  | 0.03 | 0.06 | 0 | 3.51 | 1.81  | 0.00 | 0.00 | 1  |
| 212345_s_at | CREB3L2  | cAMP responsiv                | 0.75 | -0.42 | 0.25 | 0.36 | 0 | 2.16 | 1.11  | 0.00 | 0.00 | 0 | 3.22 | 1.69  | 0.00 | 0.00 | 1  |
| 211038_s_at | CROCCL1  | ciliary rootlet coil          | 0.63 | -0.68 | 0.08 | 0.13 | 0 | 0.47 | -1.10 | 0.01 | 0.01 | 0 | 0.31 | -1.72 | 0.00 | 0.00 | -1 |
| 205159_at   | CSF2RB   | colony stimulat               | 1.25 | 0.32  | 0.59 | 0.68 | 0 | 1.32 | 0.40  | 0.49 | 0.58 | 0 | 4.40 | 2.14  | 0.00 | 0.00 | 1  |
| 203575_at   | CSNK2A2  | casein kinase 2,              | 1.34 | 0.42  | 0.33 | 0.44 | 0 | 0.53 | -0.92 | 0.03 | 0.06 | 0 | 0.33 | -1.59 | 0.00 | 0.00 | -1 |
| 210140_at   | CST7     | cystatin F (leuko             | 2.11 | 1.07  | 0.02 | 0.04 | 0 | 2.53 | 1.34  | 0.01 | 0.01 | 0 | 4.69 | 2.23  | 0.00 | 0.00 | 1  |
| 204459_at   | CSTF2    | cleavage stimula              | 2.69 | 1.43  | 0.00 | 0.00 | 0 | 2.49 | 1.31  | 0.00 | 0.00 | 0 | 3.00 | 1.59  | 0.00 | 0.00 | 1  |
| 218923_at   | CTBS     | chitobiase, di-N-             | 0.34 | -1.56 | 0.00 | 0.00 | 0 | 0.43 | -1.23 | 0.00 | 0.01 | 0 | 0.25 | -1.99 | 0.00 | 0.00 | -1 |
| 204925_at   | CTNS     | cystinosis, nephr             | 2.39 | 1.26  | 0.00 | 0.00 | 0 | 2.70 | 1.43  | 0.00 | 0.00 | 0 | 3.42 | 1.78  | 0.00 | 0.00 | 1  |
| 200838_at   | CTSB     | cathepsin B                   | 1.86 | 0.89  | 0.04 | 0.08 | 0 | 2.52 | 1.33  | 0.00 | 0.00 | 0 | 3.51 | 1.81  | 0.00 | 0.00 | 1  |
| 214073_at   | CTTN     | cortactin                     | 2.36 | 1.24  | 0.03 | 0.07 | 0 | 2.17 | 1.12  | 0.06 | 0.09 | 0 | 3.52 | 1.82  | 0.00 | 0.00 | 1  |
| 202157_s_at | CUGBP2   | CUG triplet repe              | 0.48 | -1.05 | 0.04 | 0.08 | 0 | 0.86 | -0.21 | 0.67 | 0.74 | 0 | 0.30 | -1.75 | 0.00 | 0.00 | -1 |
| 204470_at   | CXCL1    | chemokine (C-X-               | 1.07 | 0.09  | 0.86 | 0.90 | 0 | 1.33 | 0.41  | 0.46 | 0.54 | 0 | 6.26 | 2.65  | 0.00 | 0.00 | 1  |
| 204533_at   | CXCL10   | chemokine (C-X-               | 3.63 | 1.86  | 0.15 | 0.24 | 0 | 5.26 | 2.40  | 0.07 | 0.11 | 0 | 9.44 | 3.24  | 0.02 | 0.02 | 1  |
| 217028_at   | CXCR4    | chemokine (C-X-               | 2.60 | 1.38  | 0.05 | 0.09 | 0 | 1.78 | 0.84  | 0.23 | 0.31 | 0 | 6.16 | 2.62  | 0.00 | 0.00 | 1  |
| 202263_at   | CYB5R1   | cytochrome b5 ri              | 1.63 | 0.71  | 0.03 | 0.06 | 0 | 1.55 | 0.63  | 0.06 | 0.09 | 0 | 3.15 | 1.65  | 0.00 | 0.00 | 1  |
| 212133_at   | CYFIP1   | cytoplasmic FMF               | 2.26 | 1.18  | 0.00 | 0.00 | 0 | 2.81 | 1.49  | 0.00 | 0.00 | 0 | 3.17 | 1.67  | 0.00 | 0.00 | 1  |
| 213295_at   | CYLD     | cyldromatosis                 | 0.58 | -0.78 | 0.03 | 0.05 | 0 | 0.37 | -1.45 | 0.00 | 0.00 | 0 | 0.33 | -1.60 | 0.00 | 0.00 | -1 |
| 221905_at   | CYLD     | cyldromatosis                 | 0.76 | -0.40 | 0.30 | 0.41 | 0 | 0.38 | -1.39 | 0.00 | 0.00 | 0 | 0.31 | -1.72 | 0.00 | 0.00 | -1 |
| 214131_at   | CYorf15B | chromosome Y c                | 0.40 | -1.32 | 0.27 | 0.38 | 0 | 0.23 | -2.14 | 0.08 | 0.12 | 0 | 0.11 | -3.18 | 0.01 | 0.02 | -1 |
| 205073_at   | CYP2J2   | cytochrome P45                | 0.78 | -0.36 | 0.29 | 0.40 | 0 | 0.41 | -1.27 | 0.00 | 0.00 | 0 | 0.29 | -1.77 | 0.00 | 0.00 | -1 |
| 202879_s_at | CYTH1    | cytohesin 1                   | 2.53 | 1.34  | 0.00 | 0.00 | 0 | 2.57 | 1.36  | 0.00 | 0.00 | 0 | 3.69 | 1.88  | 0.00 | 0.00 | 1  |
| 219001_s_at | DCAF10   | DDB1 and CUL4                 | 0.43 | -1.21 | 0.00 | 0.01 | 0 | 0.45 | -1.15 | 0.01 | 0.01 | 0 | 0.30 | -1.76 | 0.00 | 0.00 | -1 |
| 219717_at   | DCAF16   | DDB1 and CUL4                 | 0.42 | -1.25 | 0.02 | 0.03 | 0 | 0.36 | -1.49 | 0.01 | 0.01 | 0 | 0.28 | -1.86 | 0.00 | 0.00 | -1 |
| 205338_s_at | DCT      | dopachrome tau                | 1.24 | 0.31  | 0.73 | 0.81 | 0 | 0.31 | -1.67 | 0.07 | 0.11 | 0 | 0.08 | -3.58 | 0.00 | 0.00 | -1 |
| 209094_at   | DDAH1    | dimethylarginine              | 1.18 | 0.24  | 0.65 | 0.74 | 0 | 0.73 | -0.45 | 0.41 | 0.50 | 0 | 0.12 | -3.05 | 0.00 | 0.00 | -1 |
| 213998_s_at | DDX17    | DEAD (Asp-Glu-                | 0.38 | -1.40 | 0.01 | 0.02 | 0 | 0.37 | -1.43 | 0.01 | 0.01 | 0 | 0.33 | -1.60 | 0.00 | 0.00 | -1 |
| 205684_s_at | DENND4C  | DENN/MADD dc                  | 0.67 | -0.58 | 0.17 | 0.27 | 0 | 0.35 | -1.52 | 0.00 | 0.00 | 0 | 0.21 | -2.22 | 0.00 | 0.00 | -1 |

|             |          |                    |      |       |      |      |   |      |       |      |      |   |      |       |      |      |    |
|-------------|----------|--------------------|------|-------|------|------|---|------|-------|------|------|---|------|-------|------|------|----|
| 218858_at   | DEPDC6   | DEP domain cor     | 1.34 | 0.42  | 0.50 | 0.61 | 0 | 0.79 | -0.34 | 0.59 | 0.67 | 0 | 0.21 | -2.23 | 0.00 | 0.00 | -1 |
| 219799_s_at | DHRS9    | dehydrogenase/i    | 1.38 | 0.46  | 0.46 | 0.56 | 0 | 2.23 | 1.16  | 0.06 | 0.10 | 0 | 3.65 | 1.87  | 0.00 | 0.00 | 1  |
| 201386_s_at | DHX15    | DEAH (Asp-Glu-     | 0.45 | -1.17 | 0.00 | 0.00 | 0 | 0.42 | -1.27 | 0.00 | 0.00 | 0 | 0.32 | -1.63 | 0.00 | 0.00 | -1 |
| 219350_s_at | DIABLO   | diablo homolog (   | 2.41 | 1.27  | 0.00 | 0.00 | 0 | 2.55 | 1.35  | 0.00 | 0.00 | 0 | 3.28 | 1.71  | 0.00 | 0.00 | 1  |
| 206253_at   | DLG2     | discs, large hom   | 0.36 | -1.46 | 0.00 | 0.00 | 0 | 0.35 | -1.51 | 0.00 | 0.00 | 0 | 0.33 | -1.61 | 0.00 | 0.00 | -1 |
| 218435_at   | DNAJC15  | DnaJ (Hsp40) hc    | 1.78 | 0.83  | 0.03 | 0.06 | 0 | 1.56 | 0.64  | 0.09 | 0.14 | 0 | 3.21 | 1.68  | 0.00 | 0.00 | 1  |
| 219861_at   | DNAJC17  | DnaJ (Hsp40) hc    | 0.39 | -1.38 | 0.00 | 0.00 | 0 | 0.36 | -1.48 | 0.00 | 0.00 | 0 | 0.28 | -1.85 | 0.00 | 0.00 | -1 |
| 204008_at   | DNAL4    | dynein, axonem     | 2.67 | 1.42  | 0.00 | 0.00 | 0 | 2.86 | 1.51  | 0.00 | 0.00 | 0 | 4.00 | 2.00  | 0.00 | 0.00 | 1  |
| 214663_at   | DSTYK    | dual serine/threc  | 0.94 | -0.09 | 0.75 | 0.82 | 0 | 0.45 | -1.15 | 0.00 | 0.00 | 0 | 0.31 | -1.71 | 0.00 | 0.00 | -1 |
| 218585_s_at | DTL      | denticleless hom   | 0.63 | -0.67 | 0.15 | 0.23 | 0 | 0.75 | -0.41 | 0.37 | 0.46 | 0 | 0.27 | -1.90 | 0.00 | 0.00 | -1 |
| 203270_at   | DTYMK    | deoxythymidylat    | 2.44 | 1.29  | 0.00 | 0.00 | 0 | 2.45 | 1.29  | 0.00 | 0.00 | 0 | 3.08 | 1.62  | 0.00 | 0.00 | 1  |
| 201999_s_at | DYNLT1   | dynein, light chai | 1.56 | 0.64  | 0.00 | 0.00 | 0 | 2.44 | 1.29  | 0.00 | 0.00 | 0 | 3.11 | 1.64  | 0.00 | 0.00 | 1  |
| 202248_at   | E2F4     | E2F transcription  | 2.44 | 1.29  | 0.00 | 0.00 | 0 | 2.54 | 1.34  | 0.00 | 0.00 | 0 | 3.07 | 1.62  | 0.00 | 0.00 | 1  |
| 219990_at   | E2F8     | E2F transcription  | 0.79 | -0.33 | 0.56 | 0.66 | 0 | 0.42 | -1.24 | 0.03 | 0.06 | 0 | 0.32 | -1.64 | 0.01 | 0.01 | -1 |
| 204464_s_at | EDNRA    | endothelin recep   | 1.49 | 0.58  | 0.38 | 0.49 | 0 | 2.35 | 1.23  | 0.06 | 0.10 | 0 | 3.18 | 1.67  | 0.01 | 0.02 | 1  |
| 91703_at    | EHBP1L1  | EH domain bindi    | 1.74 | 0.80  | 0.04 | 0.07 | 0 | 2.70 | 1.43  | 0.00 | 0.00 | 0 | 3.29 | 1.72  | 0.00 | 0.00 | 1  |
| 221870_at   | EHD2     | EH-domain cont     | 1.88 | 0.91  | 0.04 | 0.08 | 0 | 2.20 | 1.14  | 0.01 | 0.02 | 0 | 3.05 | 1.61  | 0.00 | 0.00 | 1  |
| 219190_s_at | EIF2C4   | eukaryotic transl  | 0.66 | -0.59 | 0.06 | 0.10 | 0 | 0.45 | -1.15 | 0.00 | 0.00 | 0 | 0.24 | -2.07 | 0.00 | 0.00 | -1 |
| 215190_at   | EIF3M    | eukaryotic transl  | 0.51 | -0.96 | 0.04 | 0.08 | 0 | 0.39 | -1.37 | 0.00 | 0.01 | 0 | 0.24 | -2.05 | 0.00 | 0.00 | -1 |
| 201123_s_at | EIF5A    | eukaryotic transl  | 2.43 | 1.28  | 0.02 | 0.03 | 0 | 1.34 | 0.42  | 0.42 | 0.51 | 0 | 3.22 | 1.69  | 0.00 | 0.00 | 1  |
| 204256_at   | ELOVL6   | ELOVL family m     | 0.96 | -0.06 | 0.91 | 0.94 | 0 | 0.55 | -0.87 | 0.09 | 0.14 | 0 | 0.27 | -1.92 | 0.00 | 0.00 | -1 |
| 204975_at   | EMP2     | epithelial membr   | 1.05 | 0.07  | 0.84 | 0.89 | 0 | 0.47 | -1.08 | 0.00 | 0.00 | 0 | 0.31 | -1.71 | 0.00 | 0.00 | -1 |
| 201341_at   | ENC1     | ectodermal-neur    | 1.76 | 0.81  | 0.07 | 0.12 | 0 | 2.49 | 1.32  | 0.00 | 0.00 | 0 | 5.13 | 2.36  | 0.00 | 0.00 | 1  |
| 201340_s_at | ENC1     | ectodermal-neur    | 0.94 | -0.09 | 0.84 | 0.89 | 0 | 2.59 | 1.37  | 0.00 | 0.00 | 0 | 3.46 | 1.79  | 0.00 | 0.00 | 1  |
| 202221_s_at | EP300    | E1A binding prot   | 0.59 | -0.77 | 0.02 | 0.05 | 0 | 0.47 | -1.10 | 0.00 | 0.00 | 0 | 0.28 | -1.85 | 0.00 | 0.00 | -1 |
| 209368_at   | EPHX2    | epoxide hydrolas   | 1.15 | 0.21  | 0.61 | 0.70 | 0 | 0.42 | -1.24 | 0.00 | 0.00 | 0 | 0.24 | -2.03 | 0.00 | 0.00 | -1 |
| 205767_at   | EREG     | epiregulin         | 0.38 | -1.41 | 0.05 | 0.09 | 0 | 0.38 | -1.40 | 0.05 | 0.08 | 0 | 0.33 | -1.62 | 0.02 | 0.04 | -1 |
| 213541_s_at | ERG      | v-ets erythroblas  | 1.53 | 0.61  | 0.14 | 0.22 | 0 | 2.38 | 1.25  | 0.00 | 0.00 | 0 | 3.31 | 1.73  | 0.00 | 0.00 | 1  |
| 205225_at   | ESR1     | estrogen receptc   | 1.67 | 0.74  | 0.12 | 0.19 | 0 | 1.70 | 0.76  | 0.11 | 0.16 | 0 | 3.44 | 1.78  | 0.00 | 0.00 | 1  |
| 203249_at   | EZH1     | enhancer of zest   | 0.80 | -0.33 | 0.29 | 0.40 | 0 | 0.50 | -0.99 | 0.00 | 0.00 | 0 | 0.31 | -1.69 | 0.00 | 0.00 | -1 |
| 204403_x_at | FAM115A  | family with sequ   | 0.45 | -1.16 | 0.00 | 0.00 | 0 | 0.35 | -1.50 | 0.00 | 0.00 | 0 | 0.31 | -1.67 | 0.00 | 0.00 | -1 |
| 202972_s_at | FAM13A   | family with sequ   | 0.51 | -0.96 | 0.01 | 0.02 | 0 | 0.56 | -0.85 | 0.02 | 0.04 | 0 | 0.31 | -1.67 | 0.00 | 0.00 | -1 |
| 208092_s_at | FAM49A   | family with sequ   | 1.63 | 0.70  | 0.12 | 0.19 | 0 | 2.95 | 1.56  | 0.00 | 0.00 | 0 | 3.94 | 1.98  | 0.00 | 0.00 | 1  |
| 218029_at   | FAM65A   | family with sequ   | 2.50 | 1.32  | 0.00 | 0.00 | 0 | 2.89 | 1.53  | 0.00 | 0.00 | 0 | 4.38 | 2.13  | 0.00 | 0.00 | 1  |
| 219895_at   | FAM70A   | family with sequ   | 0.53 | -0.92 | 0.08 | 0.13 | 0 | 0.36 | -1.46 | 0.01 | 0.01 | 0 | 0.21 | -2.25 | 0.00 | 0.00 | -1 |
| 204511_at   | FARP2    | FERM, RhoGEF       | 0.99 | -0.02 | 0.96 | 0.97 | 0 | 0.41 | -1.30 | 0.00 | 0.00 | 0 | 0.32 | -1.67 | 0.00 | 0.00 | -1 |
| 202766_s_at | FBN1     | fibrillin 1        | 0.88 | -0.18 | 0.73 | 0.80 | 0 | 2.55 | 1.35  | 0.01 | 0.02 | 0 | 5.89 | 2.56  | 0.00 | 0.00 | 1  |
| 209630_s_at | FBXW2    | F-box and WD re    | 0.52 | -0.93 | 0.00 | 0.00 | 0 | 0.37 | -1.45 | 0.00 | 0.00 | 0 | 0.31 | -1.71 | 0.00 | 0.00 | -1 |
| 218751_s_at | FBXW7    | F-box and WD re    | 0.65 | -0.63 | 0.13 | 0.21 | 0 | 0.35 | -1.52 | 0.00 | 0.00 | 0 | 0.23 | -2.11 | 0.00 | 0.00 | -1 |
| 209210_s_at | FERMT2   | fermitin family hc | 1.17 | 0.22  | 0.74 | 0.81 | 0 | 2.06 | 1.05  | 0.12 | 0.18 | 0 | 3.37 | 1.75  | 0.01 | 0.02 | 1  |
| 203638_s_at | FGFR2    | fibroblast growth  | 0.77 | -0.38 | 0.35 | 0.46 | 0 | 0.49 | -1.04 | 0.01 | 0.02 | 0 | 0.32 | -1.67 | 0.00 | 0.00 | -1 |
| 204834_at   | FGL2     | fibrinogen-like 2  | 1.70 | 0.77  | 0.11 | 0.18 | 0 | 1.82 | 0.87  | 0.07 | 0.12 | 0 | 3.73 | 1.90  | 0.00 | 0.00 | 1  |
| 215704_at   | FLG      | filaggrin          | 0.60 | -0.75 | 0.61 | 0.70 | 0 | 0.14 | -2.86 | 0.06 | 0.09 | 0 | 0.04 | -4.67 | 0.00 | 0.00 | -1 |
| 212025_s_at | FLII     | flightless I homol | 2.68 | 1.42  | 0.00 | 0.00 | 0 | 2.66 | 1.41  | 0.00 | 0.00 | 0 | 3.16 | 1.66  | 0.00 | 0.00 | 1  |
| 64900_at    | FLJ22167 | hypothetical prot  | 0.76 | -0.40 | 0.25 | 0.35 | 0 | 0.36 | -1.47 | 0.00 | 0.00 | 0 | 0.20 | -2.33 | 0.00 | 0.00 | -1 |
| 212464_s_at | FN1      | fibronectin 1      | 0.67 | -0.59 | 0.50 | 0.61 | 0 | 3.30 | 1.72  | 0.05 | 0.09 | 0 | 7.06 | 2.82  | 0.00 | 0.00 | 1  |
| 211719_x_at | FN1      | fibronectin 1      | 0.57 | -0.81 | 0.37 | 0.48 | 0 | 3.10 | 1.63  | 0.07 | 0.12 | 0 | 5.54 | 2.47  | 0.01 | 0.01 | 1  |
| 209864_at   | FRAT2    | frequently rearra  | 0.97 | -0.05 | 0.87 | 0.90 | 0 | 0.43 | -1.21 | 0.00 | 0.00 | 0 | 0.27 | -1.89 | 0.00 | 0.00 | -1 |

|             |           |                           |      |       |      |      |   |      |       |      |      |   |      |       |      |      |    |
|-------------|-----------|---------------------------|------|-------|------|------|---|------|-------|------|------|---|------|-------|------|------|----|
| 204948_s_at | FST       | folliculin                | 0.95 | -0.08 | 0.91 | 0.94 | 0 | 2.82 | 1.50  | 0.04 | 0.07 | 0 | 6.18 | 2.63  | 0.00 | 0.00 | 1  |
| 203592_s_at | FSTL3     | folliculin-like 3 (       | 1.83 | 0.87  | 0.03 | 0.06 | 0 | 2.17 | 1.12  | 0.01 | 0.01 | 0 | 5.03 | 2.33  | 0.00 | 0.00 | 1  |
| 214211_at   | FBXO1     | ferritin, heavy po        | 0.88 | -0.18 | 0.63 | 0.72 | 0 | 1.74 | 0.80  | 0.04 | 0.06 | 0 | 3.28 | 1.71  | 0.00 | 0.00 | 1  |
| 212788_x_at | FTL       | ferritin, light poly      | 1.87 | 0.90  | 0.01 | 0.02 | 0 | 2.67 | 1.42  | 0.00 | 0.00 | 0 | 4.24 | 2.08  | 0.00 | 0.00 | 1  |
| 208869_s_at | GABARAPL1 | GABA(A) recept            | 0.79 | -0.34 | 0.38 | 0.49 | 0 | 0.54 | -0.88 | 0.03 | 0.04 | 0 | 0.32 | -1.67 | 0.00 | 0.00 | -1 |
| 217787_s_at | GALNT2    | UDP-N-acetyl-gl           | 1.38 | 0.46  | 0.18 | 0.27 | 0 | 1.72 | 0.79  | 0.02 | 0.04 | 0 | 3.43 | 1.78  | 0.00 | 0.00 | 1  |
| 214855_s_at | GARNL1    | GTPase activator          | 0.37 | -1.42 | 0.00 | 0.00 | 0 | 0.45 | -1.14 | 0.00 | 0.00 | 0 | 0.28 | -1.82 | 0.00 | 0.00 | -1 |
| 203925_at   | GCLM      | glutamate-cysteine        | 1.37 | 0.46  | 0.23 | 0.33 | 0 | 2.68 | 1.42  | 0.00 | 0.00 | 0 | 4.88 | 2.29  | 0.00 | 0.00 | 1  |
| 209919_x_at | GGT1      | gamma-glutamyl            | 2.37 | 1.24  | 0.00 | 0.00 | 0 | 2.45 | 1.29  | 0.00 | 0.00 | 0 | 3.22 | 1.69  | 0.00 | 0.00 | 1  |
| 200648_s_at | GLUL      | glutamate-aminoc          | 2.39 | 1.26  | 0.01 | 0.03 | 0 | 2.50 | 1.32  | 0.01 | 0.02 | 0 | 3.15 | 1.66  | 0.00 | 0.00 | 1  |
| 201040_at   | GNAI2     | guanine nucleotide        | 1.84 | 0.88  | 0.05 | 0.09 | 0 | 2.94 | 1.56  | 0.00 | 0.00 | 0 | 3.37 | 1.75  | 0.00 | 0.00 | 1  |
| 213180_s_at | GOSR2     | golgi SNAP receptor       | 1.33 | 0.42  | 0.27 | 0.38 | 0 | 2.86 | 1.52  | 0.00 | 0.00 | 0 | 5.18 | 2.37  | 0.00 | 0.00 | 1  |
| 212510_at   | GPD1L     | glycerol-3-phospho        | 0.82 | -0.29 | 0.33 | 0.44 | 0 | 0.47 | -1.09 | 0.00 | 0.00 | 0 | 0.33 | -1.60 | 0.00 | 0.00 | -1 |
| 209169_at   | GPM6B     | glycoprotein M6B          | 0.50 | -1.00 | 0.07 | 0.12 | 0 | 0.54 | -0.89 | 0.10 | 0.16 | 0 | 0.21 | -2.26 | 0.00 | 0.00 | -1 |
| 209631_s_at | GPR37     | G protein-coupled         | 0.58 | -0.80 | 0.13 | 0.21 | 0 | 0.35 | -1.52 | 0.01 | 0.01 | 0 | 0.31 | -1.71 | 0.00 | 0.00 | -1 |
| 218154_at   | GSDMD     | gasdermin D               | 1.74 | 0.80  | 0.01 | 0.01 | 0 | 2.19 | 1.13  | 0.00 | 0.00 | 0 | 3.38 | 1.76  | 0.00 | 0.00 | 1  |
| 200824_at   | GSTP1     | glutathione S-transferase | 2.21 | 1.14  | 0.00 | 0.00 | 0 | 2.41 | 1.27  | 0.00 | 0.00 | 0 | 3.32 | 1.73  | 0.00 | 0.00 | 1  |
| 221942_s_at | GUCY1A3   | guanylate cyclase         | 1.31 | 0.39  | 0.41 | 0.52 | 0 | 2.37 | 1.24  | 0.01 | 0.02 | 0 | 4.04 | 2.02  | 0.00 | 0.00 | 1  |
| 201554_x_at | GYG1      | glycogenin 1              | 1.28 | 0.35  | 0.51 | 0.61 | 0 | 2.80 | 1.49  | 0.01 | 0.01 | 0 | 3.94 | 1.98  | 0.00 | 0.00 | 1  |
| 210164_at   | GZMB      | granzyme B (granule       | 1.03 | 0.05  | 0.93 | 0.95 | 0 | 2.09 | 1.07  | 0.07 | 0.11 | 0 | 4.60 | 2.20  | 0.00 | 0.00 | 1  |
| 211998_at   | H3F3B     | H3 histone, family        | 0.47 | -1.09 | 0.01 | 0.01 | 0 | 0.38 | -1.39 | 0.00 | 0.00 | 0 | 0.29 | -1.77 | 0.00 | 0.00 | -1 |
| 209116_x_at | HBB       | hemoglobin, beta          | 2.72 | 1.44  | 0.11 | 0.19 | 0 | 1.81 | 0.86  | 0.34 | 0.43 | 0 | 4.20 | 2.07  | 0.03 | 0.04 | 1  |
| 203746_s_at | HCCS      | holocytochrome c          | 2.70 | 1.43  | 0.00 | 0.00 | 0 | 2.84 | 1.51  | 0.00 | 0.00 | 0 | 4.12 | 2.04  | 0.00 | 0.00 | 1  |
| 207067_s_at | HDC       | histidine decarboxylase   | 2.73 | 1.45  | 0.00 | 0.00 | 0 | 2.71 | 1.44  | 0.00 | 0.00 | 0 | 3.14 | 1.65  | 0.00 | 0.00 | 1  |
| 218306_s_at | HERC1     | hect (homologous          | 0.55 | -0.86 | 0.00 | 0.00 | 0 | 0.56 | -0.83 | 0.00 | 0.00 | 0 | 0.33 | -1.59 | 0.00 | 0.00 | -1 |
| 214455_at   | HIST1H2BC | histone cluster 1         | 0.94 | -0.10 | 0.87 | 0.91 | 0 | 2.58 | 1.37  | 0.02 | 0.04 | 0 | 4.14 | 2.05  | 0.00 | 0.00 | 1  |
| 222305_at   | HK2       | hexokinase 2              | 2.60 | 1.38  | 0.00 | 0.00 | 0 | 3.00 | 1.58  | 0.00 | 0.00 | 0 | 3.27 | 1.71  | 0.00 | 0.00 | 1  |
| 205671_s_at | HLA-DOB   | major histocompatibility  | 2.17 | 1.12  | 0.01 | 0.01 | 0 | 1.81 | 0.85  | 0.03 | 0.06 | 0 | 3.10 | 1.63  | 0.00 | 0.00 | 1  |
| 213537_at   | HLA-DPA1  | major histocompatibility  | 2.40 | 1.26  | 0.01 | 0.01 | 0 | 1.53 | 0.61  | 0.17 | 0.25 | 0 | 3.70 | 1.89  | 0.00 | 0.00 | 1  |
| 216548_x_at | HMGB3L1   | high-mobility group       | 2.35 | 1.23  | 0.00 | 0.00 | 0 | 2.46 | 1.30  | 0.00 | 0.00 | 0 | 3.25 | 1.70  | 0.00 | 0.00 | 1  |
| 222040_at   | HNRNPA1   | heterogeneous nuclear     | 0.54 | -0.88 | 0.15 | 0.24 | 0 | 0.33 | -1.58 | 0.01 | 0.02 | 0 | 0.32 | -1.65 | 0.01 | 0.01 | -1 |
| 221480_at   | HNRNPD    | heterogeneous nuclear     | 0.38 | -1.40 | 0.00 | 0.00 | 0 | 0.37 | -1.42 | 0.00 | 0.00 | 0 | 0.33 | -1.61 | 0.00 | 0.00 | -1 |
| 221860_at   | HNRNPL    | heterogeneous nuclear     | 0.78 | -0.35 | 0.34 | 0.45 | 0 | 0.39 | -1.38 | 0.00 | 0.00 | 0 | 0.30 | -1.72 | 0.00 | 0.00 | -1 |
| 204647_at   | HOMER3    | homer homolog 3           | 1.81 | 0.86  | 0.01 | 0.02 | 0 | 2.75 | 1.46  | 0.00 | 0.00 | 0 | 3.25 | 1.70  | 0.00 | 0.00 | 1  |
| 204778_x_at | HOXB7     | homeobox B7               | 1.03 | 0.05  | 0.89 | 0.92 | 0 | 2.69 | 1.43  | 0.00 | 0.00 | 0 | 3.28 | 1.72  | 0.00 | 0.00 | 1  |
| 211549_s_at | HPGD      | hydroxyprostaglandin      | 0.84 | -0.25 | 0.57 | 0.67 | 0 | 0.42 | -1.24 | 0.01 | 0.01 | 0 | 0.28 | -1.83 | 0.00 | 0.00 | -1 |
| 203913_s_at | HPGD      | hydroxyprostaglandin      | 0.85 | -0.23 | 0.76 | 0.82 | 0 | 0.49 | -1.04 | 0.17 | 0.24 | 0 | 0.18 | -2.46 | 0.00 | 0.00 | -1 |
| 203914_x_at | HPGD      | hydroxyprostaglandin      | 0.72 | -0.47 | 0.53 | 0.63 | 0 | 0.60 | -0.74 | 0.32 | 0.41 | 0 | 0.14 | -2.80 | 0.00 | 0.00 | -1 |
| 211548_s_at | HPGD      | hydroxyprostaglandin      | 0.41 | -1.28 | 0.11 | 0.18 | 0 | 0.29 | -1.79 | 0.03 | 0.05 | 0 | 0.08 | -3.66 | 0.00 | 0.00 | -1 |
| 205466_s_at | HS3ST1    | heparan sulfate 3-O-      | 1.13 | 0.17  | 0.76 | 0.83 | 0 | 2.60 | 1.38  | 0.02 | 0.03 | 0 | 3.92 | 1.97  | 0.00 | 0.00 | 1  |
| 205404_at   | HSD11B1   | hydroxysteroid oxidase    | 0.59 | -0.75 | 0.18 | 0.28 | 0 | 0.35 | -1.52 | 0.01 | 0.02 | 0 | 0.26 | -1.95 | 0.00 | 0.00 | -1 |
| 219113_x_at | HSD17B14  | hydroxysteroid oxidase    | 2.53 | 1.34  | 0.00 | 0.00 | 0 | 2.91 | 1.54  | 0.00 | 0.00 | 0 | 5.20 | 2.38  | 0.00 | 0.00 | 1  |
| 205700_at   | HSD17B6   | hydroxysteroid oxidase    | 1.31 | 0.39  | 0.47 | 0.58 | 0 | 2.94 | 1.56  | 0.01 | 0.01 | 0 | 3.56 | 1.83  | 0.00 | 0.00 | 1  |
| 210338_s_at | HSPA8     | heat shock 70kDa          | 1.50 | 0.58  | 0.44 | 0.55 | 0 | 3.14 | 1.65  | 0.03 | 0.05 | 0 | 4.13 | 2.05  | 0.01 | 0.01 | 1  |
| 208687_x_at | HSPA8     | heat shock 70kDa          | 2.08 | 1.06  | 0.01 | 0.02 | 0 | 2.74 | 1.46  | 0.00 | 0.00 | 0 | 3.56 | 1.83  | 0.00 | 0.00 | 1  |
| 201655_s_at | HSPG2     | heparan sulfate gly       | 2.25 | 1.17  | 0.03 | 0.05 | 0 | 2.59 | 1.38  | 0.01 | 0.02 | 0 | 3.27 | 1.71  | 0.00 | 0.00 | 1  |
| 208744_x_at | HSPH1     | heat shock 105kDa         | 1.32 | 0.40  | 0.31 | 0.42 | 0 | 1.53 | 0.61  | 0.13 | 0.19 | 0 | 3.58 | 1.84  | 0.00 | 0.00 | 1  |
| 206976_s_at | HSPH1     | heat shock 105kDa         | 1.25 | 0.32  | 0.35 | 0.46 | 0 | 1.95 | 0.97  | 0.01 | 0.01 | 0 | 3.49 | 1.80  | 0.00 | 0.00 | 1  |



|             |          |                                 |      |       |      |      |   |      |       |      |      |   |       |       |      |      |    |
|-------------|----------|---------------------------------|------|-------|------|------|---|------|-------|------|------|---|-------|-------|------|------|----|
| 202637_s_at | ICAM1    | intercellular adhe              | 1.67 | 0.74  | 0.02 | 0.04 | 0 | 2.62 | 1.39  | 0.00 | 0.00 | 0 | 4.63  | 2.21  | 0.00 | 0.00 | 1  |
| 201609_x_at | ICMT     | isoprenylcysteine               | 2.21 | 1.14  | 0.00 | 0.00 | 0 | 2.88 | 1.52  | 0.00 | 0.00 | 0 | 3.20  | 1.68  | 0.00 | 0.00 | 1  |
| 201422_at   | IFI30    | interferon, gamma               | 2.06 | 1.04  | 0.01 | 0.01 | 0 | 1.58 | 0.66  | 0.08 | 0.12 | 0 | 3.06  | 1.62  | 0.00 | 0.00 | 1  |
| 201642_at   | IFNGR2   | interferon gamma                | 2.31 | 1.21  | 0.00 | 0.00 | 0 | 2.77 | 1.47  | 0.00 | 0.00 | 0 | 3.38  | 1.76  | 0.00 | 0.00 | 1  |
| 202718_at   | IGFBP2   | insulin-like growth             | 1.33 | 0.41  | 0.58 | 0.68 | 0 | 3.20 | 1.68  | 0.03 | 0.05 | 0 | 5.64  | 2.50  | 0.00 | 0.00 | 1  |
| 201887_at   | IL13RA1  | interleukin 13 receptor         | 1.56 | 0.64  | 0.01 | 0.02 | 0 | 2.23 | 1.16  | 0.00 | 0.00 | 0 | 3.10  | 1.63  | 0.00 | 0.00 | 1  |
| 202948_at   | IL1R1    | interleukin 1 receptor          | 0.61 | -0.71 | 0.00 | 0.00 | 0 | 0.38 | -1.41 | 0.00 | 0.00 | 0 | 0.26  | -1.97 | 0.00 | 0.00 | -1 |
| 211372_s_at | IL1R2    | interleukin 1 receptor          | 1.00 | 0.00  | 1.00 | 0.99 | 0 | 0.34 | -1.54 | 0.00 | 0.00 | 0 | 0.27  | -1.92 | 0.00 | 0.00 | -1 |
| 207526_s_at | IL1RL1   | interleukin 1 receptor          | 1.27 | 0.35  | 0.34 | 0.45 | 0 | 1.79 | 0.84  | 0.03 | 0.04 | 0 | 3.33  | 1.74  | 0.00 | 0.00 | 1  |
| 206569_at   | IL24     | interleukin 24                  | 1.20 | 0.26  | 0.72 | 0.79 | 0 | 2.03 | 1.02  | 0.16 | 0.23 | 0 | 6.74  | 2.75  | 0.00 | 0.00 | 1  |
| 205798_at   | IL7R     | interleukin 7 receptor          | 1.62 | 0.70  | 0.26 | 0.36 | 0 | 2.86 | 1.52  | 0.02 | 0.03 | 0 | 9.45  | 3.24  | 0.00 | 0.00 | 1  |
| 202859_x_at | IL8      | interleukin 8                   | 1.60 | 0.68  | 0.40 | 0.51 | 0 | 2.03 | 1.02  | 0.21 | 0.28 | 0 | 4.96  | 2.31  | 0.01 | 0.01 | 1  |
| 207094_at   | IL8RA    | interleukin 8 receptor          | 2.86 | 1.51  | 0.00 | 0.00 | 0 | 2.88 | 1.53  | 0.00 | 0.00 | 0 | 4.14  | 2.05  | 0.00 | 0.00 | 1  |
| 210511_s_at | INHBA    | inhibin, beta A                 | 0.86 | -0.22 | 0.72 | 0.80 | 0 | 2.42 | 1.28  | 0.04 | 0.07 | 0 | 10.89 | 3.44  | 0.00 | 0.00 | 1  |
| 221185_s_at | IQCG     | IQ motif containing             | 1.69 | 0.75  | 0.27 | 0.38 | 0 | 1.90 | 0.92  | 0.18 | 0.26 | 0 | 9.26  | 3.21  | 0.00 | 0.00 | 1  |
| 202531_at   | IRF1     | interferon regulatory           | 3.00 | 1.58  | 0.00 | 0.00 | 0 | 2.34 | 1.23  | 0.01 | 0.02 | 0 | 4.25  | 2.09  | 0.00 | 0.00 | 1  |
| 209184_s_at | IRS2     | insulin receptor substrate      | 0.75 | -0.42 | 0.31 | 0.42 | 0 | 0.37 | -1.43 | 0.00 | 0.00 | 0 | 0.26  | -1.94 | 0.00 | 0.00 | -1 |
| 210239_at   | IRX5     | iroquois homeobox               | 0.51 | -0.98 | 0.03 | 0.06 | 0 | 0.54 | -0.89 | 0.05 | 0.08 | 0 | 0.22  | -2.22 | 0.00 | 0.00 | -1 |
| 33304_at    | ISG20    | interferon stimulator           | 2.40 | 1.26  | 0.02 | 0.03 | 0 | 3.00 | 1.58  | 0.00 | 0.00 | 0 | 4.59  | 2.20  | 0.00 | 0.00 | 1  |
| 207191_s_at | ISLR     | immunoglobulin                  | 1.65 | 0.73  | 0.10 | 0.16 | 0 | 2.27 | 1.18  | 0.01 | 0.01 | 0 | 3.01  | 1.59  | 0.00 | 0.00 | 1  |
| 201474_s_at | ITGA3    | integrin, alpha 3               | 2.28 | 1.19  | 0.00 | 0.00 | 0 | 2.80 | 1.49  | 0.00 | 0.00 | 0 | 5.99  | 2.58  | 0.00 | 0.00 | 1  |
| 201389_at   | ITGA5    | integrin, alpha 5               | 0.84 | -0.25 | 0.58 | 0.68 | 0 | 1.51 | 0.59  | 0.19 | 0.26 | 0 | 3.73  | 1.90  | 0.00 | 0.00 | 1  |
| 215177_s_at | ITGA6    | integrin, alpha 6               | 1.33 | 0.41  | 0.46 | 0.56 | 0 | 1.97 | 0.98  | 0.08 | 0.13 | 0 | 6.48  | 2.70  | 0.00 | 0.00 | 1  |
| 202747_s_at | ITM2A    | integral membrane               | 0.63 | -0.67 | 0.21 | 0.31 | 0 | 0.73 | -0.46 | 0.39 | 0.48 | 0 | 0.21  | -2.22 | 0.00 | 0.00 | -1 |
| 201465_s_at | JUN      | jun oncogene                    | 1.69 | 0.75  | 0.13 | 0.21 | 0 | 2.40 | 1.26  | 0.01 | 0.02 | 0 | 3.56  | 1.83  | 0.00 | 0.00 | 1  |
| 203845_at   | KAT2B    | K(lysine) acetyltransferase     | 0.51 | -0.97 | 0.01 | 0.01 | 0 | 0.68 | -0.56 | 0.11 | 0.16 | 0 | 0.31  | -1.68 | 0.00 | 0.00 | -1 |
| 220727_at   | KCNK10   | potassium channel               | 1.96 | 0.97  | 0.00 | 0.01 | 0 | 2.85 | 1.51  | 0.00 | 0.00 | 0 | 3.13  | 1.65  | 0.00 | 0.00 | 1  |
| 220412_x_at | KCNK7    | potassium channel               | 1.36 | 0.45  | 0.30 | 0.41 | 0 | 0.45 | -1.15 | 0.01 | 0.02 | 0 | 0.33  | -1.60 | 0.00 | 0.00 | -1 |
| 200922_at   | KDELR1   | KDEL (Lys-Asp)-binding          | 2.52 | 1.33  | 0.00 | 0.00 | 0 | 2.62 | 1.39  | 0.00 | 0.00 | 0 | 3.72  | 1.89  | 0.00 | 0.00 | 1  |
| 204017_at   | KDELR3   | KDEL (Lys-Asp)-binding          | 1.72 | 0.78  | 0.08 | 0.14 | 0 | 2.90 | 1.54  | 0.00 | 0.00 | 0 | 4.25  | 2.09  | 0.00 | 0.00 | 1  |
| 212689_s_at | KDM3A    | lysine (K)-specific demethylase | 0.65 | -0.63 | 0.01 | 0.02 | 0 | 0.44 | -1.17 | 0.00 | 0.00 | 0 | 0.33  | -1.59 | 0.00 | 0.00 | -1 |
| 202386_s_at | KIAA0430 | KIAA0430                        | 0.41 | -1.30 | 0.01 | 0.01 | 0 | 0.52 | -0.94 | 0.04 | 0.06 | 0 | 0.28  | -1.85 | 0.00 | 0.00 | -1 |
| 213340_s_at | KIAA0495 | KIAA0495                        | 0.80 | -0.33 | 0.47 | 0.58 | 0 | 0.43 | -1.21 | 0.01 | 0.02 | 0 | 0.21  | -2.24 | 0.00 | 0.00 | -1 |
| 212314_at   | KIAA0746 | KIAA0746 protein                | 1.47 | 0.56  | 0.28 | 0.39 | 0 | 2.81 | 1.49  | 0.01 | 0.01 | 0 | 4.96  | 2.31  | 0.00 | 0.00 | 1  |
| 220911_s_at | KIAA1305 | KIAA1305                        | 0.87 | -0.20 | 0.44 | 0.55 | 0 | 0.43 | -1.21 | 0.00 | 0.00 | 0 | 0.24  | -2.06 | 0.00 | 0.00 | -1 |
| 221901_at   | KIAA1644 | KIAA1644                        | 1.22 | 0.28  | 0.46 | 0.57 | 0 | 2.21 | 1.15  | 0.00 | 0.01 | 0 | 6.32  | 2.66  | 0.00 | 0.00 | 1  |
| 52837_at    | KIAA1644 | KIAA1644                        | 0.72 | -0.48 | 0.27 | 0.37 | 0 | 1.29 | 0.36  | 0.40 | 0.49 | 0 | 5.24  | 2.39  | 0.00 | 0.00 | 1  |
| 202962_at   | KIF13B   | kinesin family member           | 0.60 | -0.75 | 0.07 | 0.12 | 0 | 0.36 | -1.47 | 0.00 | 0.00 | 0 | 0.31  | -1.72 | 0.00 | 0.00 | -1 |
| 203390_s_at | KIF3C    | kinesin family member           | 1.32 | 0.40  | 0.23 | 0.33 | 0 | 2.24 | 1.16  | 0.00 | 0.00 | 0 | 3.60  | 1.85  | 0.00 | 0.00 | 1  |
| 205051_s_at | KIT      | v-kit Hardy-Zuckers             | 0.64 | -0.64 | 0.32 | 0.43 | 0 | 0.42 | -1.26 | 0.05 | 0.09 | 0 | 0.16  | -2.65 | 0.00 | 0.00 | -1 |
| 209792_s_at | KLK10    | kallikrein-related              | 2.46 | 1.30  | 0.07 | 0.12 | 0 | 2.55 | 1.35  | 0.06 | 0.10 | 0 | 3.81  | 1.93  | 0.01 | 0.01 | 1  |
| 207023_x_at | KRT10    | keratin 10                      | 0.72 | -0.47 | 0.47 | 0.58 | 0 | 0.42 | -1.26 | 0.06 | 0.09 | 0 | 0.31  | -1.70 | 0.01 | 0.02 | -1 |
| 201596_x_at | KRT18    | keratin 18                      | 2.24 | 1.16  | 0.10 | 0.16 | 0 | 2.80 | 1.49  | 0.04 | 0.06 | 0 | 7.69  | 2.94  | 0.00 | 0.00 | 1  |
| 201650_at   | KRT19    | keratin 19                      | 1.17 | 0.22  | 0.70 | 0.78 | 0 | 2.80 | 1.48  | 0.01 | 0.02 | 0 | 11.33 | 3.50  | 0.00 | 0.00 | 1  |
| 210663_s_at | KYNU     | kynureninase (L-tryptophan)     | 1.74 | 0.80  | 0.02 | 0.04 | 0 | 2.83 | 1.50  | 0.00 | 0.00 | 0 | 5.02  | 2.33  | 0.00 | 0.00 | 1  |
| 216641_s_at | LAD1     | ladinin 1                       | 2.84 | 1.50  | 0.00 | 0.00 | 0 | 2.32 | 1.21  | 0.00 | 0.00 | 0 | 4.12  | 2.04  | 0.00 | 0.00 | 1  |
| 207509_s_at | LAIR2    | leukocyte-associated            | 1.63 | 0.71  | 0.14 | 0.22 | 0 | 2.09 | 1.07  | 0.03 | 0.05 | 0 | 3.13  | 1.64  | 0.00 | 0.00 | 1  |
| 203726_s_at | LAMA3    | laminin, alpha 3                | 0.91 | -0.14 | 0.73 | 0.80 | 0 | 1.57 | 0.65  | 0.10 | 0.16 | 0 | 4.72  | 2.24  | 0.00 | 0.00 | 1  |

|             |           |                     |      |       |      |      |   |      |       |      |      |   |       |       |      |      |    |
|-------------|-----------|---------------------|------|-------|------|------|---|------|-------|------|------|---|-------|-------|------|------|----|
| 202267_at   | LAMC2     | laminin, gamma      | 0.79 | -0.34 | 0.59 | 0.69 | 0 | 1.17 | 0.23  | 0.71 | 0.77 | 0 | 6.77  | 2.76  | 0.00 | 0.00 | 1  |
| 201720_s_at | LAPTM5    | lysosomal protei    | 1.27 | 0.35  | 0.41 | 0.52 | 0 | 1.85 | 0.89  | 0.04 | 0.06 | 0 | 3.16  | 1.66  | 0.00 | 0.00 | 1  |
| 218651_s_at | LARP6     | La ribonucleoprc    | 1.45 | 0.54  | 0.14 | 0.22 | 0 | 1.53 | 0.61  | 0.09 | 0.14 | 0 | 3.15  | 1.65  | 0.00 | 0.00 | 1  |
| 222212_s_at | LASS2     | LAG1 homolog, u     | 1.61 | 0.69  | 0.05 | 0.09 | 0 | 2.23 | 1.16  | 0.00 | 0.00 | 0 | 3.75  | 1.91  | 0.00 | 0.00 | 1  |
| 221011_s_at | LBH       | limb bud and her    | 1.40 | 0.49  | 0.44 | 0.55 | 0 | 2.73 | 1.45  | 0.02 | 0.04 | 0 | 3.22  | 1.69  | 0.01 | 0.01 | 1  |
| 207710_at   | LCE2B     | late cornified en   | 1.15 | 0.20  | 0.82 | 0.87 | 0 | 0.25 | -2.00 | 0.03 | 0.05 | 0 | 0.13  | -2.96 | 0.00 | 0.00 | -1 |
| 208450_at   | LGALS2    | lectin, galactosid  | 1.55 | 0.63  | 0.30 | 0.41 | 0 | 1.31 | 0.39  | 0.52 | 0.60 | 0 | 3.06  | 1.61  | 0.01 | 0.02 | 1  |
| 219699_at   | LGI2      | leucine-rich repe   | 2.45 | 1.29  | 0.00 | 0.00 | 0 | 2.77 | 1.47  | 0.00 | 0.00 | 0 | 3.25  | 1.70  | 0.00 | 0.00 | 1  |
| 207104_x_at | LILRB1    | leukocyte immur     | 2.24 | 1.16  | 0.00 | 0.00 | 0 | 2.31 | 1.21  | 0.00 | 0.00 | 0 | 3.20  | 1.68  | 0.00 | 0.00 | 1  |
| 217892_s_at | LIMA1     | LIM domain and      | 1.48 | 0.57  | 0.02 | 0.05 | 0 | 2.04 | 1.03  | 0.00 | 0.00 | 0 | 4.09  | 2.03  | 0.00 | 0.00 | 1  |
| 204357_s_at | LIMK1     | LIM domain kina     | 2.73 | 1.45  | 0.00 | 0.00 | 0 | 2.98 | 1.58  | 0.00 | 0.00 | 0 | 3.21  | 1.68  | 0.00 | 0.00 | 1  |
| 31837_at    | LMF2      | lipase maturator    | 2.41 | 1.27  | 0.00 | 0.00 | 0 | 2.83 | 1.50  | 0.00 | 0.00 | 0 | 3.69  | 1.88  | 0.00 | 0.00 | 1  |
| 212682_s_at | LMF2      | lipase maturator    | 2.34 | 1.22  | 0.00 | 0.00 | 0 | 2.57 | 1.36  | 0.00 | 0.00 | 0 | 3.02  | 1.59  | 0.00 | 0.00 | 1  |
| 221949_at   | LOC222070 | hypothetical prot   | 0.37 | -1.46 | 0.00 | 0.00 | 0 | 0.39 | -1.37 | 0.00 | 0.00 | 0 | 0.27  | -1.87 | 0.00 | 0.00 | -1 |
| 217506_at   | LOC339290 | hypothetical LOC    | 0.68 | -0.57 | 0.23 | 0.33 | 0 | 0.61 | -0.72 | 0.13 | 0.19 | 0 | 0.27  | -1.89 | 0.00 | 0.00 | -1 |
| 222347_at   | LOC644450 | hypothetical prot   | 0.56 | -0.84 | 0.26 | 0.36 | 0 | 0.97 | -0.05 | 0.95 | 0.95 | 0 | 0.27  | -1.92 | 0.01 | 0.02 | -1 |
| 222054_at   | LOC728448 | peptidylprolyl iso  | 0.53 | -0.92 | 0.00 | 0.00 | 0 | 0.36 | -1.47 | 0.00 | 0.00 | 0 | 0.30  | -1.76 | 0.00 | 0.00 | -1 |
| 207720_at   | LOR       | loricrin            | 1.39 | 0.48  | 0.72 | 0.80 | 0 | 0.25 | -1.98 | 0.15 | 0.21 | 0 | 0.07  | -3.85 | 0.01 | 0.01 | -1 |
| 216250_s_at | LPXN      | leupaxin            | 1.39 | 0.47  | 0.34 | 0.45 | 0 | 1.31 | 0.39  | 0.44 | 0.52 | 0 | 3.71  | 1.89  | 0.00 | 0.00 | 1  |
| 37796_at    | LRCH4     | leucine-rich repe   | 1.85 | 0.89  | 0.00 | 0.00 | 0 | 2.48 | 1.31  | 0.00 | 0.00 | 0 | 3.02  | 1.60  | 0.00 | 0.00 | 1  |
| 211596_s_at | LRIG1     | leucine-rich repe   | 0.65 | -0.62 | 0.33 | 0.43 | 0 | 0.42 | -1.26 | 0.05 | 0.08 | 0 | 0.27  | -1.90 | 0.00 | 0.00 | -1 |
| 220254_at   | LRP12     | low density lipop   | 0.36 | -1.50 | 0.00 | 0.00 | 0 | 0.52 | -0.95 | 0.01 | 0.01 | 0 | 0.31  | -1.68 | 0.00 | 0.00 | -1 |
| 207339_s_at | LTB       | lymphotoxin betz    | 1.52 | 0.61  | 0.21 | 0.31 | 0 | 1.09 | 0.13  | 0.79 | 0.84 | 0 | 3.79  | 1.92  | 0.00 | 0.00 | 1  |
| 204682_at   | LTBP2     | latent transformi   | 1.58 | 0.66  | 0.17 | 0.26 | 0 | 2.04 | 1.03  | 0.03 | 0.06 | 0 | 3.94  | 1.98  | 0.00 | 0.00 | 1  |
| 202626_s_at | LYN       | v-yes-1 Yamagu      | 2.12 | 1.08  | 0.00 | 0.00 | 0 | 2.28 | 1.19  | 0.00 | 0.00 | 0 | 3.79  | 1.92  | 0.00 | 0.00 | 1  |
| 210754_s_at | LYN       | v-yes-1 Yamagu      | 2.37 | 1.25  | 0.00 | 0.00 | 0 | 2.15 | 1.10  | 0.00 | 0.00 | 0 | 3.11  | 1.64  | 0.00 | 0.00 | 1  |
| 209942_x_at | MAGEA3    | melanoma antig      | 1.14 | 0.18  | 0.77 | 0.84 | 0 | 2.19 | 1.13  | 0.08 | 0.13 | 0 | 5.27  | 2.40  | 0.00 | 0.00 | 1  |
| 214254_at   | MAGEA4    | melanoma antig      | 1.00 | -0.01 | 0.99 | 0.99 | 0 | 1.30 | 0.38  | 0.42 | 0.51 | 0 | 3.56  | 1.83  | 0.00 | 0.00 | 1  |
| 214612_x_at | MAGEA6    | melanoma antig      | 1.08 | 0.11  | 0.87 | 0.90 | 0 | 2.11 | 1.07  | 0.10 | 0.16 | 0 | 5.52  | 2.46  | 0.00 | 0.00 | 1  |
| 218918_at   | MAN1C1    | mannosidase, al     | 0.54 | -0.88 | 0.04 | 0.08 | 0 | 0.40 | -1.34 | 0.00 | 0.00 | 0 | 0.28  | -1.82 | 0.00 | 0.00 | -1 |
| 203552_at   | MAP4K5    | mitogen-activate    | 0.46 | -1.13 | 0.00 | 0.00 | 0 | 0.39 | -1.36 | 0.00 | 0.00 | 0 | 0.27  | -1.88 | 0.00 | 0.00 | -1 |
| 204813_at   | MAPK10    | mitogen-activate    | 1.76 | 0.81  | 0.00 | 0.00 | 0 | 2.22 | 1.15  | 0.00 | 0.00 | 0 | 3.84  | 1.94  | 0.00 | 0.00 | 1  |
| 200644_at   | MARCKSL1  | MARCKS-like 1       | 2.15 | 1.11  | 0.05 | 0.10 | 0 | 2.88 | 1.53  | 0.01 | 0.01 | 0 | 4.84  | 2.28  | 0.00 | 0.00 | 1  |
| 212693_at   | MDN1      | MDN1, midasin I     | 0.65 | -0.62 | 0.03 | 0.06 | 0 | 0.34 | -1.56 | 0.00 | 0.00 | 0 | 0.32  | -1.67 | 0.00 | 0.00 | -1 |
| 202618_s_at | MECP2     | methyl CpG bind     | 2.30 | 1.20  | 0.00 | 0.00 | 0 | 2.43 | 1.28  | 0.00 | 0.00 | 0 | 3.11  | 1.64  | 0.00 | 0.00 | 1  |
| 212209_at   | MED13L    | mediator comple     | 0.45 | -1.16 | 0.00 | 0.00 | 0 | 0.38 | -1.38 | 0.00 | 0.00 | 0 | 0.32  | -1.66 | 0.00 | 0.00 | -1 |
| 221650_s_at | MED18     | mediator comple     | 2.19 | 1.13  | 0.00 | 0.00 | 0 | 2.73 | 1.45  | 0.00 | 0.00 | 0 | 3.11  | 1.64  | 0.00 | 0.00 | 1  |
| 209363_s_at | MED21     | mediator comple     | 2.06 | 1.04  | 0.02 | 0.05 | 0 | 2.90 | 1.54  | 0.00 | 0.00 | 0 | 3.68  | 1.88  | 0.00 | 0.00 | 1  |
| 204069_at   | MEIS1     | Meis homeobox       | 0.70 | -0.52 | 0.09 | 0.16 | 0 | 0.69 | -0.54 | 0.08 | 0.13 | 0 | 0.21  | -2.26 | 0.00 | 0.00 | -1 |
| 213403_at   | MFSD9     | major facilitator s | 0.67 | -0.59 | 0.25 | 0.35 | 0 | 0.43 | -1.22 | 0.02 | 0.03 | 0 | 0.31  | -1.67 | 0.00 | 0.00 | -1 |
| 217553_at   | MGC87042  | STEAP family pr     | 1.01 | 0.02  | 0.98 | 0.98 | 0 | 2.88 | 1.53  | 0.01 | 0.02 | 0 | 7.67  | 2.94  | 0.00 | 0.00 | 1  |
| 211026_s_at | MGLL      | monoglyceride liq   | 2.11 | 1.08  | 0.02 | 0.05 | 0 | 2.63 | 1.39  | 0.00 | 0.00 | 0 | 3.07  | 1.62  | 0.00 | 0.00 | 1  |
| 209672_s_at | MIOS      | missing oocyte, i   | 0.44 | -1.20 | 0.00 | 0.00 | 0 | 0.35 | -1.52 | 0.00 | 0.00 | 0 | 0.31  | -1.69 | 0.00 | 0.00 | -1 |
| 206427_s_at | MLANA     | melan-A             | 2.19 | 1.13  | 0.16 | 0.25 | 0 | 1.37 | 0.45  | 0.57 | 0.65 | 0 | 0.24  | -2.07 | 0.01 | 0.02 | -1 |
| 206426_at   | MLANA     | melan-A             | 2.61 | 1.38  | 0.15 | 0.24 | 0 | 1.43 | 0.51  | 0.59 | 0.67 | 0 | 0.20  | -2.31 | 0.02 | 0.03 | -1 |
| 212079_s_at | MLL       | myeloid/lymphoi     | 0.37 | -1.45 | 0.01 | 0.03 | 0 | 0.37 | -1.44 | 0.01 | 0.03 | 0 | 0.24  | -2.05 | 0.00 | 0.00 | -1 |
| 204580_at   | MMP12     | matrix metallope    | 1.14 | 0.19  | 0.86 | 0.90 | 0 | 2.31 | 1.21  | 0.28 | 0.37 | 0 | 32.97 | 5.04  | 0.00 | 0.00 | 1  |
| 205959_at   | MMP13     | matrix metallope    | 0.96 | -0.05 | 0.94 | 0.95 | 0 | 2.37 | 1.24  | 0.07 | 0.11 | 0 | 12.53 | 3.65  | 0.00 | 0.00 | 1  |

|             |         |                    |      |       |      |      |   |      |       |      |      |   |       |       |      |      |    |
|-------------|---------|--------------------|------|-------|------|------|---|------|-------|------|------|---|-------|-------|------|------|----|
| 206234_s_at | MMP17   | matrix metallo     | 2.62 | 1.39  | 0.00 | 0.00 | 0 | 2.81 | 1.49  | 0.00 | 0.00 | 0 | 3.50  | 1.81  | 0.00 | 0.00 | 1  |
| 205828_at   | MMP3    | matrix metallo     | 1.19 | 0.25  | 0.85 | 0.89 | 0 | 4.77 | 2.25  | 0.10 | 0.15 | 0 | 16.38 | 4.03  | 0.00 | 0.00 | 1  |
| 204259_at   | MMP7    | matrix metallo     | 1.09 | 0.12  | 0.84 | 0.89 | 0 | 1.16 | 0.22  | 0.71 | 0.77 | 0 | 5.43  | 2.44  | 0.00 | 0.00 | 1  |
| 205330_at   | MN1     | meningioma (dis    | 1.08 | 0.11  | 0.82 | 0.87 | 0 | 1.34 | 0.42  | 0.39 | 0.48 | 0 | 3.81  | 1.93  | 0.00 | 0.00 | 1  |
| 219265_at   | MOBK12B | MOB1, Mps One      | 2.33 | 1.22  | 0.00 | 0.00 | 0 | 2.20 | 1.14  | 0.00 | 0.00 | 0 | 3.62  | 1.86  | 0.00 | 0.00 | 1  |
| 221692_s_at | MRPL34  | mitochondrial rib  | 0.52 | -0.94 | 0.01 | 0.01 | 0 | 0.41 | -1.27 | 0.00 | 0.00 | 0 | 0.33  | -1.60 | 0.00 | 0.00 | -1 |
| 218281_at   | MRPL48  | mitochondrial rib  | 1.99 | 1.00  | 0.00 | 0.01 | 0 | 2.60 | 1.38  | 0.00 | 0.00 | 0 | 3.15  | 1.66  | 0.00 | 0.00 | 1  |
| 204331_s_at | MRPS12  | mitochondrial rib  | 1.91 | 0.93  | 0.03 | 0.06 | 0 | 2.76 | 1.47  | 0.00 | 0.00 | 0 | 4.32  | 2.11  | 0.00 | 0.00 | 1  |
| 209421_at   | MSH2    | mutS homolog 2     | 0.46 | -1.14 | 0.03 | 0.06 | 0 | 0.52 | -0.94 | 0.07 | 0.11 | 0 | 0.31  | -1.69 | 0.00 | 0.00 | -1 |
| 213380_x_at | MSTP9   | macrophage stin    | 0.92 | -0.13 | 0.83 | 0.87 | 0 | 0.55 | -0.86 | 0.14 | 0.21 | 0 | 0.30  | -1.72 | 0.00 | 0.01 | -1 |
| 203212_s_at | MTMR2   | myotubularin rel   | 1.18 | 0.24  | 0.52 | 0.62 | 0 | 2.36 | 1.24  | 0.00 | 0.00 | 0 | 3.29  | 1.72  | 0.00 | 0.00 | 1  |
| 212277_at   | MTMR4   | myotubularin rel   | 0.65 | -0.63 | 0.09 | 0.15 | 0 | 0.50 | -1.00 | 0.01 | 0.01 | 0 | 0.29  | -1.79 | 0.00 | 0.00 | -1 |
| 203774_at   | MTR     | 5-methyltetrahyd   | 0.51 | -0.97 | 0.00 | 0.01 | 0 | 0.38 | -1.41 | 0.00 | 0.00 | 0 | 0.28  | -1.85 | 0.00 | 0.00 | -1 |
| 215560_x_at | MTRF1L  | mitochondrial tra  | 0.50 | -1.01 | 0.00 | 0.00 | 0 | 0.37 | -1.43 | 0.00 | 0.00 | 0 | 0.30  | -1.72 | 0.00 | 0.00 | -1 |
| 213693_s_at | MUC1    | mucin 1, cell sur  | 2.16 | 1.11  | 0.05 | 0.09 | 0 | 2.09 | 1.06  | 0.06 | 0.09 | 0 | 3.82  | 1.93  | 0.00 | 0.00 | 1  |
| 216671_x_at | MUC8    | mucin 8            | 2.32 | 1.21  | 0.00 | 0.00 | 0 | 2.63 | 1.39  | 0.00 | 0.00 | 0 | 3.11  | 1.64  | 0.00 | 0.00 | 1  |
| 218246_at   | MUL1    | mitochondrial E3   | 2.48 | 1.31  | 0.00 | 0.00 | 0 | 2.78 | 1.47  | 0.00 | 0.00 | 0 | 3.31  | 1.73  | 0.00 | 0.00 | 1  |
| 201960_s_at | MYCBP2  | MYC binding prc    | 0.67 | -0.57 | 0.01 | 0.02 | 0 | 0.38 | -1.38 | 0.00 | 0.00 | 0 | 0.26  | -1.92 | 0.00 | 0.00 | -1 |
| 214058_at   | MYCL1   | v-myc myelocytic   | 0.67 | -0.57 | 0.28 | 0.38 | 0 | 0.34 | -1.55 | 0.01 | 0.01 | 0 | 0.30  | -1.73 | 0.00 | 0.00 | -1 |
| 203216_s_at | MYO6    | myosin VI          | 0.41 | -1.28 | 0.01 | 0.01 | 0 | 0.34 | -1.56 | 0.00 | 0.00 | 0 | 0.33  | -1.61 | 0.00 | 0.00 | -1 |
| 208452_x_at | MYO9B   | myosin IXB         | 2.86 | 1.51  | 0.00 | 0.00 | 0 | 2.89 | 1.53  | 0.00 | 0.00 | 0 | 3.15  | 1.66  | 0.00 | 0.00 | 1  |
| 208047_s_at | NAB1    | NGFI-A binding p   | 0.39 | -1.36 | 0.00 | 0.00 | 0 | 0.33 | -1.58 | 0.00 | 0.00 | 0 | 0.33  | -1.61 | 0.00 | 0.00 | -1 |
| 212443_at   | NBEAL2  | neurobeachin-lik   | 0.68 | -0.56 | 0.13 | 0.21 | 0 | 0.38 | -1.41 | 0.00 | 0.00 | 0 | 0.24  | -2.03 | 0.00 | 0.00 | -1 |
| 205054_at   | NEB     | nebulin            | 1.06 | 0.09  | 0.86 | 0.90 | 0 | 0.41 | -1.29 | 0.01 | 0.02 | 0 | 0.13  | -2.90 | 0.00 | 0.00 | -1 |
| 215005_at   | NECAB2  | N-terminal EF-hc   | 2.86 | 1.52  | 0.00 | 0.00 | 0 | 2.57 | 1.36  | 0.00 | 0.00 | 0 | 3.07  | 1.62  | 0.00 | 0.00 | 1  |
| 209300_s_at | NECAP1  | NECAP endocytic    | 0.46 | -1.14 | 0.00 | 0.00 | 0 | 0.50 | -1.00 | 0.00 | 0.00 | 0 | 0.31  | -1.69 | 0.00 | 0.00 | -1 |
| 221805_at   | NEFL    | neurofilament, li  | 0.87 | -0.20 | 0.76 | 0.83 | 0 | 2.23 | 1.16  | 0.08 | 0.13 | 0 | 13.34 | 3.74  | 0.00 | 0.00 | 1  |
| 221916_at   | NEFL    | neurofilament, li  | 1.42 | 0.50  | 0.39 | 0.50 | 0 | 1.81 | 0.86  | 0.15 | 0.21 | 0 | 12.16 | 3.60  | 0.00 | 0.00 | 1  |
| 205113_at   | NEFM    | neurofilament, m   | 1.13 | 0.18  | 0.72 | 0.79 | 0 | 1.39 | 0.48  | 0.33 | 0.42 | 0 | 5.51  | 2.46  | 0.00 | 0.00 | 1  |
| 216115_at   | NF1     | neurofibromin 1    | 0.34 | -1.57 | 0.00 | 0.00 | 0 | 0.37 | -1.42 | 0.00 | 0.00 | 0 | 0.24  | -2.09 | 0.00 | 0.00 | -1 |
| 214799_at   | NFASC   | neurofascin hom    | 0.38 | -1.38 | 0.00 | 0.00 | 0 | 0.36 | -1.46 | 0.00 | 0.00 | 0 | 0.16  | -2.65 | 0.00 | 0.00 | -1 |
| 208003_s_at | NFAT5   | nuclear factor of  | 0.74 | -0.44 | 0.26 | 0.36 | 0 | 0.38 | -1.40 | 0.00 | 0.00 | 0 | 0.28  | -1.86 | 0.00 | 0.00 | -1 |
| 213029_at   | NFIB    | nuclear factor I/E | 0.73 | -0.46 | 0.42 | 0.53 | 0 | 0.43 | -1.23 | 0.04 | 0.06 | 0 | 0.17  | -2.58 | 0.00 | 0.00 | -1 |
| 209290_s_at | NFIB    | nuclear factor I/E | 0.61 | -0.72 | 0.27 | 0.38 | 0 | 0.36 | -1.49 | 0.03 | 0.04 | 0 | 0.10  | -3.36 | 0.00 | 0.00 | -1 |
| 213298_at   | NFIC    | nuclear factor I/C | 0.74 | -0.43 | 0.34 | 0.45 | 0 | 0.39 | -1.36 | 0.00 | 0.00 | 0 | 0.22  | -2.16 | 0.00 | 0.00 | -1 |
| 203574_at   | NFIL3   | nuclear factor, in | 2.02 | 1.01  | 0.05 | 0.10 | 0 | 2.94 | 1.56  | 0.00 | 0.00 | 0 | 3.11  | 1.64  | 0.00 | 0.00 | 1  |
| 214062_x_at | NFKB1B  | nuclear factor of  | 2.83 | 1.50  | 0.00 | 0.00 | 0 | 2.90 | 1.54  | 0.00 | 0.00 | 0 | 3.02  | 1.59  | 0.00 | 0.00 | 1  |
| 219418_at   | NHEJ1   | nonhomologous      | 2.40 | 1.26  | 0.00 | 0.00 | 0 | 2.31 | 1.21  | 0.00 | 0.00 | 0 | 3.85  | 1.95  | 0.00 | 0.00 | 1  |
| 201591_s_at | NISCH   | nischarin          | 0.75 | -0.42 | 0.24 | 0.34 | 0 | 0.43 | -1.23 | 0.00 | 0.00 | 0 | 0.30  | -1.73 | 0.00 | 0.00 | -1 |
| 202379_s_at | NKTR    | natural killer-tum | 0.55 | -0.87 | 0.03 | 0.05 | 0 | 0.42 | -1.26 | 0.00 | 0.00 | 0 | 0.32  | -1.64 | 0.00 | 0.00 | -1 |
| 210113_s_at | NLRP1   | NLR family, pyrir  | 0.65 | -0.63 | 0.13 | 0.21 | 0 | 0.36 | -1.47 | 0.00 | 0.00 | 0 | 0.33  | -1.61 | 0.00 | 0.00 | -1 |
| 205005_s_at | NMT2    | N-mristoyltrans    | 0.61 | -0.71 | 0.04 | 0.07 | 0 | 0.46 | -1.13 | 0.00 | 0.00 | 0 | 0.26  | -1.92 | 0.00 | 0.00 | -1 |
| 202238_s_at | NNMT    | nicotinamide N-r   | 1.05 | 0.07  | 0.92 | 0.94 | 0 | 2.94 | 1.56  | 0.02 | 0.04 | 0 | 3.15  | 1.66  | 0.02 | 0.03 | 1  |
| 59625_at    | NOL3    | nucleolar protein  | 0.74 | -0.43 | 0.32 | 0.43 | 0 | 0.38 | -1.39 | 0.00 | 0.00 | 0 | 0.33  | -1.61 | 0.00 | 0.00 | -1 |
| 207310_s_at | NOS1    | nitric oxide synth | 2.57 | 1.36  | 0.00 | 0.00 | 0 | 2.81 | 1.49  | 0.00 | 0.00 | 0 | 3.20  | 1.68  | 0.00 | 0.00 | 1  |
| 203238_s_at | NOTCH3  | Notch homolog 3    | 0.59 | -0.75 | 0.06 | 0.11 | 0 | 0.35 | -1.53 | 0.00 | 0.00 | 0 | 0.26  | -1.96 | 0.00 | 0.00 | -1 |
| 39549_at    | NPAS2   | neuronal PAS do    | 0.36 | -1.46 | 0.00 | 0.00 | 0 | 0.51 | -0.96 | 0.01 | 0.02 | 0 | 0.28  | -1.82 | 0.00 | 0.00 | -1 |
| 204310_s_at | NPR2    | natriuretic peptid | 0.93 | -0.10 | 0.76 | 0.83 | 0 | 0.42 | -1.24 | 0.00 | 0.00 | 0 | 0.17  | -2.53 | 0.00 | 0.00 | -1 |

|             |         |                    |      |       |      |      |   |      |       |      |      |   |      |       |      |      |    |
|-------------|---------|--------------------|------|-------|------|------|---|------|-------|------|------|---|------|-------|------|------|----|
| 221606_s_at | NSBP1   | nucleosomal bin    | 0.37 | -1.45 | 0.00 | 0.00 | 0 | 0.38 | -1.40 | 0.00 | 0.01 | 0 | 0.22 | -2.19 | 0.00 | 0.00 | -1 |
| 217831_s_at | NSFL1C  | NSFL1 (p97) cof    | 1.69 | 0.76  | 0.07 | 0.13 | 0 | 2.74 | 1.45  | 0.00 | 0.00 | 0 | 3.26 | 1.71  | 0.00 | 0.00 | 1  |
| 203939_at   | NT5E    | 5'-nucleotidase, i | 1.60 | 0.68  | 0.13 | 0.21 | 0 | 1.60 | 0.68  | 0.13 | 0.19 | 0 | 5.04 | 2.33  | 0.00 | 0.00 | 1  |
| 206303_s_at | NUDT4   | nudix (nucleosid   | 2.66 | 1.41  | 0.00 | 0.00 | 0 | 2.86 | 1.52  | 0.00 | 0.00 | 0 | 4.19 | 2.07  | 0.00 | 0.00 | 1  |
| 218295_s_at | NUP50   | nucleoporin 50kI   | 1.77 | 0.83  | 0.12 | 0.19 | 0 | 2.05 | 1.03  | 0.05 | 0.08 | 0 | 3.39 | 1.76  | 0.00 | 0.00 | 1  |
| 206498_at   | OCA2    | oculocutaneous     | 1.73 | 0.80  | 0.17 | 0.25 | 0 | 0.94 | -0.09 | 0.87 | 0.90 | 0 | 0.32 | -1.64 | 0.01 | 0.01 | -1 |
| 210443_x_at | OGFR    | opioid growth fac  | 2.30 | 1.20  | 0.00 | 0.00 | 0 | 2.73 | 1.45  | 0.00 | 0.00 | 0 | 3.10 | 1.63  | 0.00 | 0.00 | 1  |
| 212307_s_at | OGT     | O-linked N-acety   | 0.89 | -0.17 | 0.59 | 0.69 | 0 | 0.46 | -1.11 | 0.00 | 0.00 | 0 | 0.25 | -2.01 | 0.00 | 0.00 | -1 |
| 207564_x_at | OGT     | O-linked N-acety   | 0.64 | -0.65 | 0.05 | 0.09 | 0 | 0.37 | -1.44 | 0.00 | 0.00 | 0 | 0.17 | -2.55 | 0.00 | 0.00 | -1 |
| 213131_at   | OLFM1   | olfactomedin 1     | 2.42 | 1.28  | 0.07 | 0.13 | 0 | 2.42 | 1.27  | 0.07 | 0.11 | 0 | 3.94 | 1.98  | 0.01 | 0.01 | 1  |
| 218556_at   | ORMDL2  | ORM1-like 2 (S.    | 1.98 | 0.99  | 0.01 | 0.02 | 0 | 2.92 | 1.55  | 0.00 | 0.00 | 0 | 3.46 | 1.79  | 0.00 | 0.00 | 1  |
| 222125_s_at | P4HTM   | prolyl 4-hydroxyl  | 0.83 | -0.28 | 0.42 | 0.53 | 0 | 0.37 | -1.43 | 0.00 | 0.00 | 0 | 0.20 | -2.35 | 0.00 | 0.00 | -1 |
| 203859_s_at | PALM    | paralemmin         | 0.41 | -1.30 | 0.00 | 0.00 | 0 | 0.61 | -0.71 | 0.03 | 0.05 | 0 | 0.32 | -1.62 | 0.00 | 0.00 | -1 |
| 203117_s_at | PAN2    | PAN2 poly(A) sp    | 0.52 | -0.93 | 0.03 | 0.06 | 0 | 0.36 | -1.49 | 0.00 | 0.00 | 0 | 0.22 | -2.19 | 0.00 | 0.00 | -1 |
| 203060_s_at | PAPSS2  | 3'-phosphoadenr    | 2.13 | 1.09  | 0.01 | 0.02 | 0 | 1.57 | 0.65  | 0.12 | 0.18 | 0 | 5.18 | 2.37  | 0.00 | 0.00 | 1  |
| 203058_s_at | PAPSS2  | 3'-phosphoadenr    | 2.05 | 1.03  | 0.01 | 0.02 | 0 | 1.30 | 0.38  | 0.32 | 0.41 | 0 | 3.01 | 1.59  | 0.00 | 0.00 | 1  |
| 213372_at   | PAQR3   | progesterin and ad | 0.54 | -0.90 | 0.00 | 0.01 | 0 | 0.37 | -1.43 | 0.00 | 0.00 | 0 | 0.25 | -2.02 | 0.00 | 0.00 | -1 |
| 214086_s_at | PARP2   | poly (ADP-ribos    | 0.54 | -0.90 | 0.00 | 0.00 | 0 | 0.42 | -1.25 | 0.00 | 0.00 | 0 | 0.30 | -1.74 | 0.00 | 0.00 | -1 |
| 212825_at   | PAXIP1  | PAX interacting i  | 0.52 | -0.93 | 0.01 | 0.02 | 0 | 0.46 | -1.13 | 0.00 | 0.00 | 0 | 0.31 | -1.71 | 0.00 | 0.00 | -1 |
| 203557_s_at | PCBD1   | pterin-4 alpha-ca  | 2.56 | 1.36  | 0.00 | 0.00 | 0 | 2.98 | 1.58  | 0.00 | 0.00 | 0 | 3.48 | 1.80  | 0.00 | 0.00 | 1  |
| 205534_at   | PCDH7   | protocadherin 7    | 0.94 | -0.09 | 0.89 | 0.92 | 0 | 1.53 | 0.61  | 0.34 | 0.43 | 0 | 3.23 | 1.69  | 0.01 | 0.02 | 1  |
| 210022_at   | PCGF1   | polycomb group     | 2.64 | 1.40  | 0.00 | 0.00 | 0 | 2.35 | 1.23  | 0.00 | 0.00 | 0 | 3.13 | 1.65  | 0.00 | 0.00 | 1  |
| 214937_x_at | PCM1    | pericentriolar ma  | 0.43 | -1.20 | 0.00 | 0.00 | 0 | 0.37 | -1.45 | 0.00 | 0.00 | 0 | 0.27 | -1.89 | 0.00 | 0.00 | -1 |
| 215175_at   | PCNX    | pecanex homolo     | 0.45 | -1.15 | 0.02 | 0.04 | 0 | 0.35 | -1.50 | 0.00 | 0.00 | 0 | 0.33 | -1.60 | 0.00 | 0.00 | -1 |
| 206791_s_at | PDE4C   | phosphodiestera    | 2.73 | 1.45  | 0.00 | 0.00 | 0 | 2.93 | 1.55  | 0.00 | 0.00 | 0 | 3.16 | 1.66  | 0.00 | 0.00 | 1  |
| 203857_s_at | PDIA5   | protein disulfide  | 1.26 | 0.34  | 0.42 | 0.53 | 0 | 2.39 | 1.26  | 0.00 | 0.00 | 0 | 3.77 | 1.92  | 0.00 | 0.00 | 1  |
| 219165_at   | PDLIM2  | PDZ and LIM do     | 0.77 | -0.37 | 0.23 | 0.33 | 0 | 0.46 | -1.13 | 0.00 | 0.00 | 0 | 0.33 | -1.60 | 0.00 | 0.00 | -1 |
| 211564_s_at | PDLIM4  | PDZ and LIM do     | 1.35 | 0.43  | 0.31 | 0.42 | 0 | 1.36 | 0.45  | 0.30 | 0.38 | 0 | 3.58 | 1.84  | 0.00 | 0.00 | 1  |
| 221898_at   | PDPN    | podoplanin         | 0.41 | -1.29 | 0.00 | 0.01 | 0 | 2.11 | 1.08  | 0.02 | 0.03 | 0 | 8.04 | 3.01  | 0.00 | 0.00 | 1  |
| 220865_s_at | PDSS1   | prenyl (decaprer   | 2.22 | 1.15  | 0.00 | 0.00 | 0 | 2.96 | 1.57  | 0.00 | 0.00 | 0 | 3.73 | 1.90  | 0.00 | 0.00 | 1  |
| 218018_at   | PDXK    | pyridoxal (pyrido  | 1.39 | 0.48  | 0.24 | 0.34 | 0 | 2.76 | 1.46  | 0.00 | 0.00 | 0 | 3.84 | 1.94  | 0.00 | 0.00 | 1  |
| 220944_at   | PGLYRP4 | peptidoglycan re   | 2.90 | 1.54  | 0.00 | 0.00 | 0 | 2.25 | 1.17  | 0.01 | 0.03 | 0 | 3.41 | 1.77  | 0.00 | 0.00 | 1  |
| 201968_s_at | PGM1    | phosphoglucomu     | 2.76 | 1.47  | 0.00 | 0.00 | 0 | 2.65 | 1.41  | 0.00 | 0.00 | 0 | 3.26 | 1.70  | 0.00 | 0.00 | 1  |
| 213227_at   | PGRMC2  | progesterone rec   | 0.58 | -0.78 | 0.00 | 0.01 | 0 | 0.37 | -1.46 | 0.00 | 0.00 | 0 | 0.23 | -2.15 | 0.00 | 0.00 | -1 |
| 204866_at   | PHF16   | PHD finger prote   | 0.35 | -1.52 | 0.00 | 0.00 | 0 | 0.40 | -1.31 | 0.00 | 0.00 | 0 | 0.24 | -2.05 | 0.00 | 0.00 | -1 |
| 217952_x_at | PHF3    | PHD finger prote   | 0.51 | -0.96 | 0.00 | 0.01 | 0 | 0.48 | -1.05 | 0.00 | 0.00 | 0 | 0.28 | -1.83 | 0.00 | 0.00 | -1 |
| 201397_at   | PHGDH   | phosphoglycerat    | 1.17 | 0.23  | 0.62 | 0.71 | 0 | 0.72 | -0.47 | 0.30 | 0.38 | 0 | 0.21 | -2.28 | 0.00 | 0.00 | -1 |
| 212719_at   | PHLPP1  | PH domain and l    | 0.50 | -0.99 | 0.01 | 0.01 | 0 | 0.37 | -1.44 | 0.00 | 0.00 | 0 | 0.24 | -2.05 | 0.00 | 0.00 | -1 |
| 217862_at   | PIAS1   | protein inhibitor  | 0.42 | -1.26 | 0.01 | 0.02 | 0 | 0.42 | -1.26 | 0.01 | 0.02 | 0 | 0.32 | -1.63 | 0.00 | 0.00 | -1 |
| 205281_s_at | PIGA    | phosphatidylinos   | 0.40 | -1.34 | 0.00 | 0.00 | 0 | 0.34 | -1.57 | 0.00 | 0.00 | 0 | 0.33 | -1.62 | 0.00 | 0.00 | -1 |
| 202743_at   | PIK3R3  | phosphoinositide   | 1.24 | 0.31  | 0.55 | 0.65 | 0 | 2.86 | 1.51  | 0.01 | 0.01 | 0 | 4.31 | 2.11  | 0.00 | 0.00 | 1  |
| 201929_s_at | PKP4    | plakophilin 4      | 0.67 | -0.57 | 0.09 | 0.16 | 0 | 0.34 | -1.55 | 0.00 | 0.00 | 0 | 0.28 | -1.85 | 0.00 | 0.00 | -1 |
| 205479_s_at | PLAU    | plasminogen act    | 2.60 | 1.38  | 0.00 | 0.00 | 0 | 2.73 | 1.45  | 0.00 | 0.00 | 0 | 8.45 | 3.08  | 0.00 | 0.00 | 1  |
| 220952_s_at | PLEKHA5 | pleckstrin homol   | 0.42 | -1.27 | 0.00 | 0.00 | 0 | 0.46 | -1.13 | 0.00 | 0.00 | 0 | 0.33 | -1.62 | 0.00 | 0.00 | -1 |
| 212823_s_at | PLEKHG3 | pleckstrin homol   | 2.48 | 1.31  | 0.00 | 0.00 | 0 | 2.46 | 1.30  | 0.00 | 0.00 | 0 | 3.01 | 1.59  | 0.00 | 0.00 | 1  |
| 202185_at   | PLOD3   | procollagen-lysin  | 2.02 | 1.01  | 0.01 | 0.03 | 0 | 2.64 | 1.40  | 0.00 | 0.00 | 0 | 3.82 | 1.93  | 0.00 | 0.00 | 1  |
| 202430_s_at | PLSCR1  | phospholipid scr   | 0.51 | -0.97 | 0.04 | 0.08 | 0 | 1.85 | 0.88  | 0.07 | 0.11 | 0 | 3.00 | 1.59  | 0.00 | 0.00 | 1  |
| 213030_s_at | PLXNA2  | plexin A2          | 0.58 | -0.79 | 0.04 | 0.08 | 0 | 0.41 | -1.28 | 0.00 | 0.00 | 0 | 0.32 | -1.63 | 0.00 | 0.00 | -1 |

|             |          |                    |      |       |      |      |   |      |       |      |      |   |       |       |      |      |    |
|-------------|----------|--------------------|------|-------|------|------|---|------|-------|------|------|---|-------|-------|------|------|----|
| 217875_s_at | PMEPA1   | prostate transme   | 1.02 | 0.03  | 0.95 | 0.96 | 0 | 1.04 | 0.06  | 0.91 | 0.93 | 0 | 3.15  | 1.66  | 0.00 | 0.00 | 1  |
| 206503_x_at | PML      | promyelocytic lei  | 1.63 | 0.70  | 0.01 | 0.02 | 0 | 1.61 | 0.69  | 0.01 | 0.02 | 0 | 3.09  | 1.63  | 0.00 | 0.00 | 1  |
| 215412_x_at | PMS2L2   | postmeiotic segr   | 0.65 | -0.63 | 0.03 | 0.05 | 0 | 0.40 | -1.32 | 0.00 | 0.00 | 0 | 0.29  | -1.77 | 0.00 | 0.00 | -1 |
| 212037_at   | PNN      | pinin, desmosorr   | 0.49 | -1.02 | 0.00 | 0.00 | 0 | 0.35 | -1.53 | 0.00 | 0.00 | 0 | 0.31  | -1.70 | 0.00 | 0.00 | -1 |
| 219380_x_at | POLH     | polymerase (DN     | 0.45 | -1.14 | 0.00 | 0.00 | 0 | 0.34 | -1.57 | 0.00 | 0.00 | 0 | 0.23  | -2.12 | 0.00 | 0.00 | -1 |
| 217769_s_at | POMP     | proteasome mat     | 1.97 | 0.98  | 0.00 | 0.00 | 0 | 2.12 | 1.09  | 0.00 | 0.00 | 0 | 3.07  | 1.62  | 0.00 | 0.00 | 1  |
| 219926_at   | POPDC3   | popeye domain c    | 0.98 | -0.02 | 0.95 | 0.96 | 0 | 1.41 | 0.50  | 0.21 | 0.29 | 0 | 3.64  | 1.86  | 0.00 | 0.00 | 1  |
| 212226_s_at | PPAP2B   | phosphatidic aci   | 1.41 | 0.49  | 0.41 | 0.52 | 0 | 2.90 | 1.54  | 0.01 | 0.02 | 0 | 3.05  | 1.61  | 0.01 | 0.01 | 1  |
| 204518_s_at | PPIC     | peptidylprolyl iso | 1.13 | 0.17  | 0.65 | 0.74 | 0 | 2.05 | 1.03  | 0.01 | 0.01 | 0 | 3.06  | 1.61  | 0.00 | 0.00 | 1  |
| 216347_s_at | PPP1R13B | protein phosphal   | 0.62 | -0.69 | 0.03 | 0.07 | 0 | 0.53 | -0.91 | 0.01 | 0.01 | 0 | 0.25  | -2.01 | 0.00 | 0.00 | -1 |
| 202886_s_at | PPP2R1B  | protein phosphal   | 2.18 | 1.12  | 0.01 | 0.01 | 0 | 2.18 | 1.13  | 0.01 | 0.01 | 0 | 3.43  | 1.78  | 0.00 | 0.00 | 1  |
| 219264_s_at | PPP2R3B  | protein phosphal   | 0.49 | -1.03 | 0.00 | 0.00 | 0 | 0.36 | -1.49 | 0.00 | 0.00 | 0 | 0.27  | -1.90 | 0.00 | 0.00 | -1 |
| 207752_x_at | PRB1     | proline-rich prote | 2.38 | 1.25  | 0.00 | 0.00 | 0 | 2.58 | 1.37  | 0.00 | 0.00 | 0 | 3.18  | 1.67  | 0.00 | 0.00 | 1  |
| 213010_at   | PRKCDBP  | protein kinase C   | 1.29 | 0.37  | 0.42 | 0.53 | 0 | 2.80 | 1.48  | 0.00 | 0.00 | 0 | 4.40  | 2.14  | 0.00 | 0.00 | 1  |
| 210038_at   | PRKCQ    | protein kinase C   | 1.33 | 0.42  | 0.33 | 0.44 | 0 | 2.21 | 1.14  | 0.01 | 0.02 | 0 | 5.19  | 2.38  | 0.00 | 0.00 | 1  |
| 218613_at   | PSD3     | pleckstrin and S   | 0.40 | -1.32 | 0.04 | 0.07 | 0 | 0.46 | -1.13 | 0.07 | 0.11 | 0 | 0.29  | -1.80 | 0.01 | 0.01 | -1 |
| 202659_at   | PSMB10   | proteasome (pro    | 2.82 | 1.50  | 0.00 | 0.00 | 0 | 2.89 | 1.53  | 0.00 | 0.00 | 0 | 6.07  | 2.60  | 0.00 | 0.00 | 1  |
| 209334_s_at | PSMD9    | proteasome (pro    | 1.62 | 0.69  | 0.03 | 0.06 | 0 | 2.21 | 1.14  | 0.00 | 0.00 | 0 | 3.60  | 1.85  | 0.00 | 0.00 | 1  |
| 205194_at   | PSPH     | phosphoserine p    | 0.45 | -1.16 | 0.01 | 0.01 | 0 | 0.55 | -0.85 | 0.04 | 0.06 | 0 | 0.31  | -1.68 | 0.00 | 0.00 | -1 |
| 209815_at   | PTCH1    | patched homolo     | 0.50 | -0.99 | 0.08 | 0.14 | 0 | 0.55 | -0.86 | 0.13 | 0.19 | 0 | 0.22  | -2.17 | 0.00 | 0.00 | -1 |
| 210834_s_at | PTGER3   | prostaglandin E    | 0.54 | -0.88 | 0.03 | 0.05 | 0 | 0.35 | -1.51 | 0.00 | 0.00 | 0 | 0.24  | -2.06 | 0.00 | 0.00 | -1 |
| 213933_at   | PTGER3   | prostaglandin E    | 1.45 | 0.54  | 0.42 | 0.53 | 0 | 0.61 | -0.72 | 0.28 | 0.37 | 0 | 0.21  | -2.25 | 0.00 | 0.00 | -1 |
| 205128_x_at | PTGS1    | prostaglandin-en   | 1.11 | 0.15  | 0.74 | 0.81 | 0 | 0.37 | -1.44 | 0.00 | 0.00 | 0 | 0.29  | -1.78 | 0.00 | 0.00 | -1 |
| 211756_at   | PTHLH    | parathyroid horr   | 0.76 | -0.41 | 0.57 | 0.67 | 0 | 3.09 | 1.63  | 0.03 | 0.05 | 0 | 17.89 | 4.16  | 0.00 | 0.00 | 1  |
| 206300_s_at | PTHLH    | parathyroid horr   | 0.97 | -0.05 | 0.92 | 0.94 | 0 | 1.78 | 0.83  | 0.08 | 0.13 | 0 | 6.37  | 2.67  | 0.00 | 0.00 | 1  |
| 210355_at   | PTHLH    | parathyroid horr   | 0.67 | -0.57 | 0.22 | 0.33 | 0 | 1.24 | 0.31  | 0.50 | 0.59 | 0 | 4.49  | 2.17  | 0.00 | 0.00 | 1  |
| 219654_at   | PTPLA    | protein tyrosine p | 1.76 | 0.82  | 0.19 | 0.28 | 0 | 1.79 | 0.84  | 0.18 | 0.25 | 0 | 4.75  | 2.25  | 0.00 | 0.00 | 1  |
| 204944_at   | PTPRG    | protein tyrosine p | 1.24 | 0.31  | 0.52 | 0.63 | 0 | 2.66 | 1.41  | 0.01 | 0.01 | 0 | 3.21  | 1.68  | 0.00 | 0.00 | 1  |
| 201087_at   | PXN      | paxillin           | 1.51 | 0.60  | 0.02 | 0.03 | 0 | 1.81 | 0.86  | 0.00 | 0.00 | 0 | 3.78  | 1.92  | 0.00 | 0.00 | 1  |
| 202990_at   | PYGL     | phosphorylase, c   | 1.54 | 0.62  | 0.02 | 0.03 | 0 | 2.71 | 1.44  | 0.00 | 0.00 | 0 | 4.00  | 2.00  | 0.00 | 0.00 | 1  |
| 220209_at   | PYY2     | peptide YY, 2 (st  | 1.32 | 0.40  | 0.29 | 0.40 | 0 | 1.76 | 0.82  | 0.03 | 0.06 | 0 | 3.49  | 1.80  | 0.00 | 0.00 | 1  |
| 205174_s_at | QPCT     | glutaminy-peptic   | 0.99 | -0.01 | 0.99 | 0.99 | 0 | 0.54 | -0.89 | 0.11 | 0.17 | 0 | 0.30  | -1.72 | 0.00 | 0.00 | -1 |
| 200864_s_at | RAB11A   | RAB11A, membr      | 0.41 | -1.29 | 0.00 | 0.00 | 0 | 0.34 | -1.54 | 0.00 | 0.00 | 0 | 0.33  | -1.60 | 0.00 | 0.00 | -1 |
| 207018_s_at | RAB27B   | RAB27B, membr      | 0.43 | -1.22 | 0.01 | 0.02 | 0 | 0.50 | -1.01 | 0.03 | 0.05 | 0 | 0.32  | -1.64 | 0.00 | 0.00 | -1 |
| 219210_s_at | RAB8B    | RAB8B, membr       | 0.68 | -0.57 | 0.26 | 0.36 | 0 | 1.38 | 0.47  | 0.35 | 0.44 | 0 | 3.52  | 1.82  | 0.00 | 0.00 | 1  |
| 203020_at   | RABGAP1L | RAB GTPase ac      | 0.62 | -0.68 | 0.02 | 0.04 | 0 | 0.42 | -1.24 | 0.00 | 0.00 | 0 | 0.32  | -1.67 | 0.00 | 0.00 | -1 |
| 215342_s_at | RABGAP1L | RAB GTPase ac      | 0.49 | -1.04 | 0.06 | 0.11 | 0 | 0.46 | -1.14 | 0.04 | 0.07 | 0 | 0.24  | -2.04 | 0.00 | 0.00 | -1 |
| 202583_s_at | RANBP9   | RAN binding pro    | 0.36 | -1.49 | 0.00 | 0.00 | 0 | 0.54 | -0.89 | 0.04 | 0.07 | 0 | 0.29  | -1.81 | 0.00 | 0.00 | -1 |
| 221872_at   | RARRES1  | retinoic acid rece | 1.07 | 0.10  | 0.89 | 0.92 | 0 | 1.10 | 0.14  | 0.84 | 0.88 | 0 | 3.39  | 1.76  | 0.01 | 0.02 | 1  |
| 202033_s_at | RB1CC1   | RB1-inducible cc   | 0.40 | -1.31 | 0.00 | 0.00 | 0 | 0.34 | -1.54 | 0.00 | 0.00 | 0 | 0.29  | -1.78 | 0.00 | 0.00 | -1 |
| 212332_at   | RBL2     | retinoblastoma-li  | 0.35 | -1.51 | 0.01 | 0.01 | 0 | 0.39 | -1.38 | 0.01 | 0.02 | 0 | 0.30  | -1.72 | 0.00 | 0.00 | -1 |
| 212027_at   | RBM25    | RNA binding mo     | 0.55 | -0.86 | 0.02 | 0.03 | 0 | 0.37 | -1.43 | 0.00 | 0.00 | 0 | 0.32  | -1.64 | 0.00 | 0.00 | -1 |
| 203423_at   | RBP1     | retinol binding pr | 1.51 | 0.60  | 0.35 | 0.46 | 0 | 1.32 | 0.40  | 0.53 | 0.61 | 0 | 5.19  | 2.38  | 0.00 | 0.00 | 1  |
| 218564_at   | RFWD3    | ring finger and W  | 0.42 | -1.26 | 0.00 | 0.00 | 0 | 0.39 | -1.35 | 0.00 | 0.00 | 0 | 0.27  | -1.88 | 0.00 | 0.00 | -1 |
| 210138_at   | RGS20    | regulator of G-pr  | 1.29 | 0.37  | 0.58 | 0.68 | 0 | 2.97 | 1.57  | 0.02 | 0.04 | 0 | 4.30  | 2.10  | 0.00 | 0.00 | 1  |
| 205158_at   | RNASE4   | ribonuclease, RN   | 0.44 | -1.20 | 0.01 | 0.01 | 0 | 0.34 | -1.57 | 0.00 | 0.00 | 0 | 0.33  | -1.62 | 0.00 | 0.00 | -1 |
| 200868_s_at | RNF114   | ring finger protei | 2.35 | 1.24  | 0.00 | 0.00 | 0 | 2.74 | 1.45  | 0.00 | 0.00 | 0 | 4.25  | 2.09  | 0.00 | 0.00 | 1  |
| 219104_at   | RNF141   | ring finger protei | 1.96 | 0.97  | 0.01 | 0.01 | 0 | 2.32 | 1.21  | 0.00 | 0.00 | 0 | 3.11  | 1.64  | 0.00 | 0.00 | 1  |

|             |                     |      |       |      |      |   |      |       |      |      |   |      |       |      |      |    |
|-------------|---------------------|------|-------|------|------|---|------|-------|------|------|---|------|-------|------|------|----|
| 214697_s_at | ROD1 regulator      | 2.04 | 1.03  | 0.12 | 0.19 | 0 | 2.41 | 1.27  | 0.06 | 0.09 | 0 | 3.10 | 1.63  | 0.02 | 0.03 | 1  |
| 207624_s_at | retinitis pigmentc  | 0.44 | -1.20 | 0.00 | 0.00 | 0 | 0.47 | -1.09 | 0.00 | 0.00 | 0 | 0.23 | -2.14 | 0.00 | 0.00 | -1 |
| 213959_s_at | RPGRIP1-like        | 0.34 | -1.56 | 0.00 | 0.00 | 0 | 0.35 | -1.51 | 0.00 | 0.00 | 0 | 0.32 | -1.65 | 0.00 | 0.00 | -1 |
| 214041_x_at | ribosomal protei    | 0.44 | -1.20 | 0.09 | 0.15 | 0 | 0.39 | -1.35 | 0.06 | 0.09 | 0 | 0.25 | -2.02 | 0.01 | 0.01 | -1 |
| 203379_at   | ribosomal protei    | 1.64 | 0.71  | 0.09 | 0.15 | 0 | 1.95 | 0.97  | 0.02 | 0.04 | 0 | 3.01 | 1.59  | 0.00 | 0.00 | 1  |
| 204632_at   | ribosomal protei    | 2.94 | 1.55  | 0.00 | 0.00 | 0 | 2.97 | 1.57  | 0.00 | 0.00 | 0 | 3.53 | 1.82  | 0.00 | 0.00 | 1  |
| 204633_s_at | ribosomal protei    | 0.76 | -0.40 | 0.34 | 0.45 | 0 | 0.58 | -0.78 | 0.07 | 0.11 | 0 | 0.28 | -1.86 | 0.00 | 0.00 | -1 |
| 204635_at   | ribosomal protei    | 0.57 | -0.80 | 0.04 | 0.07 | 0 | 0.66 | -0.59 | 0.12 | 0.18 | 0 | 0.24 | -2.09 | 0.00 | 0.00 | -1 |
| 34408_at    | reticulum 2         | 2.33 | 1.22  | 0.00 | 0.00 | 0 | 2.24 | 1.16  | 0.00 | 0.00 | 0 | 3.19 | 1.67  | 0.00 | 0.00 | 1  |
| 200660_at   | S100 calcium bir    | 2.04 | 1.03  | 0.00 | 0.00 | 0 | 2.70 | 1.43  | 0.00 | 0.00 | 0 | 3.40 | 1.77  | 0.00 | 0.00 | 1  |
| 202598_at   | S100 calcium bir    | 1.86 | 0.89  | 0.00 | 0.01 | 0 | 2.39 | 1.26  | 0.00 | 0.00 | 0 | 3.13 | 1.65  | 0.00 | 0.00 | 1  |
| 204268_at   | S100 calcium bir    | 2.31 | 1.21  | 0.13 | 0.20 | 0 | 3.19 | 1.67  | 0.04 | 0.06 | 0 | 6.70 | 2.75  | 0.00 | 0.00 | 1  |
| 206027_at   | S100 calcium bir    | 0.81 | -0.31 | 0.44 | 0.55 | 0 | 1.53 | 0.61  | 0.13 | 0.19 | 0 | 6.42 | 2.68  | 0.00 | 0.00 | 1  |
| 217728_at   | S100 calcium bir    | 1.35 | 0.44  | 0.21 | 0.30 | 0 | 2.62 | 1.39  | 0.00 | 0.00 | 0 | 6.35 | 2.67  | 0.00 | 0.00 | 1  |
| 213283_s_at | sal-like 2 (Droso)  | 0.41 | -1.28 | 0.00 | 0.00 | 0 | 0.43 | -1.21 | 0.00 | 0.00 | 0 | 0.30 | -1.76 | 0.00 | 0.00 | -1 |
| 219691_at   | sterile alpha mot   | 0.75 | -0.41 | 0.32 | 0.43 | 0 | 2.78 | 1.48  | 0.00 | 0.00 | 0 | 3.68 | 1.88  | 0.00 | 0.00 | 1  |
| 204900_x_at | Sin3A-associate     | 0.63 | -0.67 | 0.13 | 0.20 | 0 | 0.46 | -1.12 | 0.01 | 0.02 | 0 | 0.30 | -1.72 | 0.00 | 0.00 | -1 |
| 214997_at   | suppressor of ca    | 0.41 | -1.29 | 0.00 | 0.00 | 0 | 0.36 | -1.46 | 0.00 | 0.00 | 0 | 0.31 | -1.69 | 0.00 | 0.00 | -1 |
| 203889_at   | secretogranin V     | 0.96 | -0.07 | 0.91 | 0.94 | 0 | 1.23 | 0.30  | 0.62 | 0.70 | 0 | 6.19 | 2.63  | 0.00 | 0.00 | 1  |
| 204030_s_at | schwannomin ini     | 0.70 | -0.52 | 0.34 | 0.45 | 0 | 2.39 | 1.26  | 0.03 | 0.05 | 0 | 3.12 | 1.64  | 0.00 | 0.00 | 1  |
| 219197_s_at | signal peptide, C   | 0.82 | -0.29 | 0.58 | 0.68 | 0 | 0.44 | -1.19 | 0.02 | 0.04 | 0 | 0.25 | -1.97 | 0.00 | 0.00 | -1 |
| 218681_s_at | stromal cell-deriv  | 2.40 | 1.26  | 0.00 | 0.00 | 0 | 2.29 | 1.19  | 0.00 | 0.00 | 0 | 3.43 | 1.78  | 0.00 | 0.00 | 1  |
| 204541_at   | SEC14-like 2 (S.    | 1.72 | 0.78  | 0.07 | 0.13 | 0 | 2.17 | 1.12  | 0.01 | 0.02 | 0 | 4.36 | 2.12  | 0.00 | 0.00 | 1  |
| 215009_s_at | SEC31 homolog       | 0.59 | -0.77 | 0.03 | 0.06 | 0 | 0.36 | -1.50 | 0.00 | 0.00 | 0 | 0.27 | -1.92 | 0.00 | 0.00 | -1 |
| 203789_s_at | sema domain, irr    | 2.12 | 1.08  | 0.11 | 0.19 | 0 | 2.90 | 1.53  | 0.03 | 0.05 | 0 | 3.90 | 1.96  | 0.01 | 0.01 | 1  |
| 203528_at   | sema domain, irr    | 1.04 | 0.06  | 0.89 | 0.92 | 0 | 0.64 | -0.65 | 0.17 | 0.24 | 0 | 0.32 | -1.64 | 0.00 | 0.00 | -1 |
| 217977_at   | selenoprotein X,    | 1.95 | 0.97  | 0.00 | 0.00 | 0 | 2.02 | 1.01  | 0.00 | 0.00 | 0 | 3.32 | 1.73  | 0.00 | 0.00 | 1  |
| 200971_s_at | stress-associate    | 2.30 | 1.20  | 0.00 | 0.00 | 0 | 2.89 | 1.53  | 0.00 | 0.00 | 0 | 3.18 | 1.67  | 0.00 | 0.00 | 1  |
| 209723_at   | serpin peptidase    | 0.94 | -0.09 | 0.90 | 0.93 | 0 | 2.73 | 1.45  | 0.04 | 0.07 | 0 | 5.39 | 2.43  | 0.00 | 0.00 | 1  |
| 218346_s_at | sestrin 1           | 0.52 | -0.96 | 0.03 | 0.06 | 0 | 0.39 | -1.37 | 0.00 | 0.00 | 0 | 0.26 | -1.94 | 0.00 | 0.00 | -1 |
| 220946_s_at | SET domain con      | 0.44 | -1.19 | 0.00 | 0.00 | 0 | 0.39 | -1.37 | 0.00 | 0.00 | 0 | 0.28 | -1.83 | 0.00 | 0.00 | -1 |
| 221806_s_at | SET domain con      | 0.51 | -0.96 | 0.01 | 0.01 | 0 | 0.44 | -1.20 | 0.00 | 0.00 | 0 | 0.32 | -1.66 | 0.00 | 0.00 | -1 |
| 219751_at   | SET domain con      | 0.77 | -0.38 | 0.30 | 0.41 | 0 | 0.37 | -1.44 | 0.00 | 0.00 | 0 | 0.33 | -1.62 | 0.00 | 0.00 | -1 |
| 222311_s_at | splicing factor, ai | 0.68 | -0.56 | 0.15 | 0.23 | 0 | 0.39 | -1.37 | 0.00 | 0.00 | 0 | 0.27 | -1.89 | 0.00 | 0.00 | -1 |
| 212179_at   | splicing factor, ai | 0.38 | -1.41 | 0.00 | 0.00 | 0 | 0.35 | -1.54 | 0.00 | 0.00 | 0 | 0.24 | -2.08 | 0.00 | 0.00 | -1 |
| 211735_x_at | surfactant protei   | 2.61 | 1.39  | 0.00 | 0.00 | 0 | 2.38 | 1.25  | 0.00 | 0.00 | 0 | 3.17 | 1.66  | 0.00 | 0.00 | 1  |
| 214199_at   | surfactant protei   | 0.44 | -1.19 | 0.00 | 0.00 | 0 | 0.36 | -1.46 | 0.00 | 0.00 | 0 | 0.21 | -2.24 | 0.00 | 0.00 | -1 |
| 207351_s_at | SH2 domain pro      | 2.05 | 1.04  | 0.00 | 0.00 | 0 | 2.95 | 1.56  | 0.00 | 0.00 | 0 | 5.12 | 2.36  | 0.00 | 0.00 | 1  |
| 219256_s_at | SH3 domain and      | 0.97 | -0.05 | 0.94 | 0.95 | 0 | 1.28 | 0.36  | 0.54 | 0.62 | 0 | 4.38 | 2.13  | 0.00 | 0.00 | 1  |
| 213221_s_at | salt-inducible kin  | 0.40 | -1.31 | 0.00 | 0.00 | 0 | 0.39 | -1.35 | 0.00 | 0.00 | 0 | 0.25 | -1.99 | 0.00 | 0.00 | -1 |
| 202254_at   | signal-induced p    | 0.82 | -0.29 | 0.48 | 0.59 | 0 | 0.64 | -0.64 | 0.13 | 0.19 | 0 | 0.32 | -1.64 | 0.00 | 0.00 | -1 |
| 202897_at   | signal-regulatory   | 2.64 | 1.40  | 0.00 | 0.00 | 0 | 2.97 | 1.57  | 0.00 | 0.00 | 0 | 4.20 | 2.07  | 0.00 | 0.00 | 1  |
| 202896_s_at | signal-regulatory   | 1.77 | 0.82  | 0.00 | 0.00 | 0 | 2.24 | 1.16  | 0.00 | 0.00 | 0 | 3.23 | 1.69  | 0.00 | 0.00 | 1  |
| 202234_s_at | solute carrier fan  | 1.43 | 0.52  | 0.38 | 0.49 | 0 | 2.81 | 1.49  | 0.01 | 0.02 | 0 | 7.74 | 2.95  | 0.00 | 0.00 | 1  |
| 209900_s_at | solute carrier fan  | 1.52 | 0.60  | 0.06 | 0.12 | 0 | 2.77 | 1.47  | 0.00 | 0.00 | 0 | 6.36 | 2.67  | 0.00 | 0.00 | 1  |
| 202236_s_at | solute carrier fan  | 1.34 | 0.42  | 0.09 | 0.16 | 0 | 2.01 | 1.01  | 0.00 | 0.00 | 0 | 3.51 | 1.81  | 0.00 | 0.00 | 1  |
| 205896_at   | solute carrier fan  | 1.55 | 0.64  | 0.06 | 0.11 | 0 | 1.81 | 0.86  | 0.01 | 0.02 | 0 | 3.43 | 1.78  | 0.00 | 0.00 | 1  |
| 221751_at   | solute carrier fan  | 0.56 | -0.85 | 0.01 | 0.01 | 0 | 0.38 | -1.41 | 0.00 | 0.00 | 0 | 0.22 | -2.16 | 0.00 | 0.00 | -1 |

|             |          |                     |      |       |      |      |   |      |       |      |      |   |      |       |      |      |    |
|-------------|----------|---------------------|------|-------|------|------|---|------|-------|------|------|---|------|-------|------|------|----|
| 206770_s_at | SLC35A3  | solute carrier fan  | 0.51 | -0.98 | 0.00 | 0.00 | 0 | 0.45 | -1.14 | 0.00 | 0.00 | 0 | 0.31 | -1.69 | 0.00 | 0.00 | -1 |
| 218485_s_at | SLC35C1  | solute carrier fan  | 2.29 | 1.20  | 0.00 | 0.00 | 0 | 2.43 | 1.28  | 0.00 | 0.00 | 0 | 3.87 | 1.95  | 0.00 | 0.00 | 1  |
| 213083_at   | SLC35D2  | solute carrier fan  | 2.60 | 1.38  | 0.00 | 0.00 | 0 | 2.36 | 1.24  | 0.00 | 0.00 | 0 | 3.24 | 1.69  | 0.00 | 0.00 | 1  |
| 212110_at   | SLC39A14 | solute carrier fan  | 1.30 | 0.38  | 0.46 | 0.57 | 0 | 2.19 | 1.13  | 0.03 | 0.06 | 0 | 3.23 | 1.69  | 0.00 | 0.00 | 1  |
| 204394_at   | SLC43A1  | solute carrier fan  | 0.64 | -0.64 | 0.01 | 0.03 | 0 | 0.36 | -1.46 | 0.00 | 0.00 | 0 | 0.33 | -1.61 | 0.00 | 0.00 | -1 |
| 201195_s_at | SLC7A5   | solute carrier fan  | 1.61 | 0.69  | 0.11 | 0.18 | 0 | 2.53 | 1.34  | 0.00 | 0.00 | 0 | 3.09 | 1.63  | 0.00 | 0.00 | 1  |
| 206544_x_at | SMARCA2  | SWI/SNF relatec     | 0.39 | -1.37 | 0.00 | 0.00 | 0 | 0.43 | -1.22 | 0.00 | 0.00 | 0 | 0.33 | -1.60 | 0.00 | 0.00 | -1 |
| 201321_s_at | SMARCC2  | SWI/SNF relatec     | 0.52 | -0.93 | 0.01 | 0.01 | 0 | 0.45 | -1.15 | 0.00 | 0.00 | 0 | 0.32 | -1.63 | 0.00 | 0.00 | -1 |
| 212569_at   | SMCHD1   | structural mainte   | 0.46 | -1.13 | 0.00 | 0.01 | 0 | 0.40 | -1.33 | 0.00 | 0.00 | 0 | 0.32 | -1.65 | 0.00 | 0.00 | -1 |
| 218404_at   | SNX10    | sorting nexin 10    | 0.73 | -0.45 | 0.48 | 0.59 | 0 | 2.65 | 1.41  | 0.03 | 0.05 | 0 | 3.13 | 1.65  | 0.01 | 0.02 | 1  |
| 215223_s_at | SOD2     | superoxide dism     | 1.97 | 0.98  | 0.04 | 0.08 | 0 | 2.42 | 1.27  | 0.01 | 0.01 | 0 | 3.21 | 1.68  | 0.00 | 0.00 | 1  |
| 204275_at   | SOLH     | small optic lobes   | 0.59 | -0.77 | 0.01 | 0.02 | 0 | 0.36 | -1.47 | 0.00 | 0.00 | 0 | 0.30 | -1.72 | 0.00 | 0.00 | -1 |
| 212560_at   | SORL1    | sortilin-related re | 0.76 | -0.40 | 0.47 | 0.58 | 0 | 1.24 | 0.31  | 0.58 | 0.66 | 0 | 3.19 | 1.67  | 0.00 | 0.00 | 1  |
| 201416_at   | SOX4     | SRY (sex deterr     | 1.37 | 0.46  | 0.33 | 0.44 | 0 | 2.36 | 1.24  | 0.01 | 0.02 | 0 | 3.33 | 1.74  | 0.00 | 0.00 | 1  |
| 213168_at   | SP3      | Sp3 transcripior    | 0.37 | -1.42 | 0.00 | 0.00 | 0 | 0.38 | -1.40 | 0.00 | 0.00 | 0 | 0.27 | -1.90 | 0.00 | 0.00 | -1 |
| 210117_at   | SPAG1    | sperm associate     | 0.37 | -1.44 | 0.02 | 0.05 | 0 | 0.33 | -1.58 | 0.01 | 0.02 | 0 | 0.31 | -1.68 | 0.01 | 0.01 | -1 |
| 209857_s_at | SPHK2    | sphingosine kina    | 2.73 | 1.45  | 0.00 | 0.00 | 0 | 2.98 | 1.57  | 0.00 | 0.00 | 0 | 3.35 | 1.74  | 0.00 | 0.00 | 1  |
| 209875_s_at | SPP1     | secreted phosph     | 1.45 | 0.53  | 0.61 | 0.70 | 0 | 2.18 | 1.12  | 0.28 | 0.37 | 0 | 8.76 | 3.13  | 0.00 | 0.00 | 1  |
| 212558_at   | SPRY1    | sprouty homolog     | 0.48 | -1.08 | 0.03 | 0.05 | 0 | 0.48 | -1.05 | 0.03 | 0.05 | 0 | 0.21 | -2.27 | 0.00 | 0.00 | -1 |
| 217995_at   | SQRDL    | sulfide quinone r   | 2.16 | 1.11  | 0.00 | 0.01 | 0 | 1.86 | 0.90  | 0.02 | 0.03 | 0 | 3.60 | 1.85  | 0.00 | 0.00 | 1  |
| 210959_s_at | SRD5A1   | steroid-5-alpha-r   | 1.49 | 0.58  | 0.25 | 0.35 | 0 | 1.60 | 0.68  | 0.18 | 0.25 | 0 | 3.26 | 1.71  | 0.00 | 0.00 | 1  |
| 208921_s_at | SRI      | sorcin              | 1.95 | 0.97  | 0.00 | 0.00 | 0 | 2.95 | 1.56  | 0.00 | 0.00 | 0 | 3.46 | 1.79  | 0.00 | 0.00 | 1  |
| 219205_at   | SRR      | serine racemase     | 1.13 | 0.17  | 0.57 | 0.67 | 0 | 2.30 | 1.20  | 0.00 | 0.00 | 0 | 3.11 | 1.64  | 0.00 | 0.00 | 1  |
| 202506_at   | SSFA2    | sperm specific a    | 0.41 | -1.30 | 0.00 | 0.00 | 0 | 0.35 | -1.54 | 0.00 | 0.00 | 0 | 0.32 | -1.63 | 0.00 | 0.00 | -1 |
| 202440_s_at | ST5      | suppression of tu   | 1.61 | 0.68  | 0.03 | 0.05 | 0 | 2.63 | 1.39  | 0.00 | 0.00 | 0 | 5.13 | 2.36  | 0.00 | 0.00 | 1  |
| 221191_at   | STAG3L1  | stromal antigen 3   | 0.76 | -0.40 | 0.36 | 0.47 | 0 | 0.37 | -1.43 | 0.00 | 0.00 | 0 | 0.25 | -2.02 | 0.00 | 0.00 | -1 |
| 218424_s_at | STEAP3   | STEAP family m      | 2.83 | 1.50  | 0.00 | 0.00 | 0 | 2.30 | 1.20  | 0.00 | 0.00 | 0 | 4.10 | 2.04  | 0.00 | 0.00 | 1  |
| 202693_s_at | STK17A   | serine/threonine    | 0.67 | -0.58 | 0.25 | 0.35 | 0 | 2.61 | 1.38  | 0.01 | 0.01 | 0 | 3.20 | 1.68  | 0.00 | 0.00 | 1  |
| 33736_at    | STOML1   | stomatin (EPB72     | 2.40 | 1.26  | 0.00 | 0.00 | 0 | 1.88 | 0.91  | 0.00 | 0.00 | 0 | 3.24 | 1.70  | 0.00 | 0.00 | 1  |
| 221701_s_at | STRA6    | stimulated by ret   | 1.68 | 0.75  | 0.04 | 0.08 | 0 | 1.81 | 0.85  | 0.02 | 0.04 | 0 | 4.20 | 2.07  | 0.00 | 0.00 | 1  |
| 221500_s_at | STX16    | syntaxin 16         | 0.41 | -1.27 | 0.00 | 0.00 | 0 | 0.36 | -1.48 | 0.00 | 0.00 | 0 | 0.28 | -1.82 | 0.00 | 0.00 | -1 |
| 201483_s_at | SUPT4H1  | suppressor of Ty    | 2.09 | 1.07  | 0.00 | 0.00 | 0 | 2.93 | 1.55  | 0.00 | 0.00 | 0 | 3.34 | 1.74  | 0.00 | 0.00 | 1  |
| 217704_x_at | SUZ12P   | suppressor of ze    | 0.37 | -1.45 | 0.00 | 0.00 | 0 | 0.34 | -1.57 | 0.00 | 0.00 | 0 | 0.33 | -1.60 | 0.00 | 0.00 | -1 |
| 209306_s_at | SWAP70   | SWAP switching      | 0.35 | -1.53 | 0.00 | 0.00 | 0 | 0.39 | -1.35 | 0.00 | 0.00 | 0 | 0.30 | -1.76 | 0.00 | 0.00 | -1 |
| 204287_at   | SYNGR1   | synaptogyrin 1      | 0.50 | -1.01 | 0.00 | 0.00 | 0 | 0.39 | -1.35 | 0.00 | 0.00 | 0 | 0.31 | -1.68 | 0.00 | 0.00 | -1 |
| 202796_at   | SYNPO    | synaptopodin        | 1.32 | 0.40  | 0.45 | 0.56 | 0 | 2.03 | 1.02  | 0.06 | 0.10 | 0 | 5.71 | 2.51  | 0.00 | 0.00 | 1  |
| 211382_s_at | TACC2    | transforming, aci   | 0.49 | -1.03 | 0.02 | 0.03 | 0 | 0.35 | -1.53 | 0.00 | 0.00 | 0 | 0.33 | -1.59 | 0.00 | 0.00 | -1 |
| 210978_s_at | TAGLN2   | transgelin 2        | 2.26 | 1.18  | 0.00 | 0.00 | 0 | 2.48 | 1.31  | 0.00 | 0.00 | 0 | 3.70 | 1.89  | 0.00 | 0.00 | 1  |
| 220789_s_at | TBRG4    | transforming gro    | 2.55 | 1.35  | 0.00 | 0.00 | 0 | 2.37 | 1.24  | 0.00 | 0.00 | 0 | 3.29 | 1.72  | 0.00 | 0.00 | 1  |
| 204849_at   | TCFL5    | transcription fact  | 0.41 | -1.28 | 0.00 | 0.00 | 0 | 0.41 | -1.29 | 0.00 | 0.00 | 0 | 0.30 | -1.73 | 0.00 | 0.00 | -1 |
| 204158_s_at | TCIRG1   | T-cell, immune r    | 1.80 | 0.85  | 0.03 | 0.05 | 0 | 2.86 | 1.52  | 0.00 | 0.00 | 0 | 5.56 | 2.48  | 0.00 | 0.00 | 1  |
| 205796_at   | TCP11L1  | t-complex 11 (m     | 0.98 | -0.03 | 0.95 | 0.96 | 0 | 2.26 | 1.17  | 0.03 | 0.04 | 0 | 3.24 | 1.70  | 0.00 | 0.00 | 1  |
| 205943_at   | TDO2     | tryptophan 2,3-d    | 0.95 | -0.08 | 0.91 | 0.93 | 0 | 1.06 | 0.08  | 0.91 | 0.93 | 0 | 4.04 | 2.02  | 0.01 | 0.01 | 1  |
| 219715_s_at | TDP1     | tyrosyl-DNA pho     | 1.35 | 0.43  | 0.23 | 0.33 | 0 | 2.33 | 1.22  | 0.00 | 0.00 | 0 | 3.74 | 1.90  | 0.00 | 0.00 | 1  |
| 214451_at   | TFAP2B   | transcription fact  | 1.17 | 0.23  | 0.77 | 0.83 | 0 | 0.36 | -1.46 | 0.06 | 0.10 | 0 | 0.07 | -3.80 | 0.00 | 0.00 | -1 |
| 206004_at   | TGM3     | transglutaminase    | 1.55 | 0.63  | 0.11 | 0.18 | 0 | 1.34 | 0.42  | 0.28 | 0.37 | 0 | 0.21 | -2.24 | 0.00 | 0.00 | -1 |
| 222122_s_at | THOC2    | THO complex 2       | 0.49 | -1.02 | 0.00 | 0.00 | 0 | 0.39 | -1.36 | 0.00 | 0.00 | 0 | 0.32 | -1.63 | 0.00 | 0.00 | -1 |
| 206555_s_at | THUMP1   | THUMP domain        | 0.48 | -1.06 | 0.00 | 0.00 | 0 | 0.34 | -1.55 | 0.00 | 0.00 | 0 | 0.31 | -1.68 | 0.00 | 0.00 | -1 |

|             |           |                      |      |       |      |      |   |      |       |      |      |   |      |       |      |      |    |
|-------------|-----------|----------------------|------|-------|------|------|---|------|-------|------|------|---|------|-------|------|------|----|
| 201666_at   | TIMP1     | TIMP metalloprotease | 2.03 | 1.02  | 0.03 | 0.05 | 0 | 2.61 | 1.38  | 0.00 | 0.00 | 0 | 4.02 | 2.01  | 0.00 | 0.00 | 1  |
| 40837_at    | TLE2      | transducin-like e    | 1.14 | 0.19  | 0.74 | 0.81 | 0 | 0.71 | -0.49 | 0.40 | 0.49 | 0 | 0.33 | -1.59 | 0.01 | 0.01 | -1 |
| 206271_at   | TLR3      | toll-like receptor   | 0.48 | -1.07 | 0.03 | 0.06 | 0 | 0.42 | -1.26 | 0.01 | 0.02 | 0 | 0.33 | -1.60 | 0.00 | 0.00 | -1 |
| 217974_at   | TM7SF3    | transmembrane        | 0.59 | -0.75 | 0.05 | 0.09 | 0 | 0.45 | -1.17 | 0.00 | 0.00 | 0 | 0.21 | -2.23 | 0.00 | 0.00 | -1 |
| 203679_at   | TMED1     | transmembrane        | 2.68 | 1.42  | 0.00 | 0.00 | 0 | 2.82 | 1.50  | 0.00 | 0.00 | 0 | 3.11 | 1.64  | 0.00 | 0.00 | 1  |
| 220097_s_at | TMEM104   | transmembrane        | 2.87 | 1.52  | 0.00 | 0.00 | 0 | 2.83 | 1.50  | 0.00 | 0.00 | 0 | 3.01 | 1.59  | 0.00 | 0.00 | 1  |
| 215250_at   | TMEM111   | transmembrane        | 0.46 | -1.13 | 0.00 | 0.00 | 0 | 0.36 | -1.48 | 0.00 | 0.00 | 0 | 0.31 | -1.69 | 0.00 | 0.00 | -1 |
| 219253_at   | TMEM185B  | transmembrane        | 1.56 | 0.64  | 0.02 | 0.05 | 0 | 2.37 | 1.24  | 0.00 | 0.00 | 0 | 3.10 | 1.63  | 0.00 | 0.00 | 1  |
| 217016_x_at | TMEM212   | transmembrane        | 0.48 | -1.07 | 0.00 | 0.00 | 0 | 0.34 | -1.54 | 0.00 | 0.00 | 0 | 0.31 | -1.69 | 0.00 | 0.00 | -1 |
| 52078_at    | TMEM222   | transmembrane        | 2.42 | 1.28  | 0.00 | 0.00 | 0 | 2.90 | 1.54  | 0.00 | 0.00 | 0 | 3.22 | 1.69  | 0.00 | 0.00 | 1  |
| 221255_s_at | TMEM93    | transmembrane        | 1.89 | 0.92  | 0.00 | 0.00 | 0 | 2.48 | 1.31  | 0.00 | 0.00 | 0 | 3.32 | 1.73  | 0.00 | 0.00 | 1  |
| 201207_at   | TNFAIP1   | tumor necrosis fa    | 2.24 | 1.17  | 0.00 | 0.00 | 0 | 2.85 | 1.51  | 0.00 | 0.00 | 0 | 3.14 | 1.65  | 0.00 | 0.00 | 1  |
| 201208_s_at | TNFAIP1   | tumor necrosis fa    | 1.83 | 0.87  | 0.00 | 0.00 | 0 | 2.67 | 1.42  | 0.00 | 0.00 | 0 | 3.12 | 1.64  | 0.00 | 0.00 | 1  |
| 209295_at   | TNFRSF10B | tumor necrosis fa    | 2.53 | 1.34  | 0.00 | 0.00 | 0 | 1.38 | 0.47  | 0.16 | 0.23 | 0 | 3.17 | 1.66  | 0.00 | 0.00 | 1  |
| 203508_at   | TNFRSF1B  | tumor necrosis fa    | 2.10 | 1.07  | 0.00 | 0.00 | 0 | 2.77 | 1.47  | 0.00 | 0.00 | 0 | 4.44 | 2.15  | 0.00 | 0.00 | 1  |
| 214581_x_at | TNFRSF21  | tumor necrosis fa    | 0.87 | -0.21 | 0.60 | 0.70 | 0 | 1.56 | 0.64  | 0.11 | 0.16 | 0 | 3.38 | 1.76  | 0.00 | 0.00 | 1  |
| 202687_s_at | TNFSF10   | tumor necrosis fa    | 1.50 | 0.59  | 0.10 | 0.16 | 0 | 2.48 | 1.31  | 0.00 | 0.00 | 0 | 3.11 | 1.64  | 0.00 | 0.00 | 1  |
| 213201_s_at | TNNT1     | troponin T type 1    | 0.89 | -0.16 | 0.70 | 0.78 | 0 | 0.41 | -1.28 | 0.00 | 0.00 | 0 | 0.30 | -1.72 | 0.00 | 0.00 | -1 |
| 221496_s_at | TOB2      | transducer of ER     | 0.76 | -0.39 | 0.40 | 0.52 | 0 | 0.38 | -1.39 | 0.01 | 0.01 | 0 | 0.30 | -1.73 | 0.00 | 0.00 | -1 |
| 201512_s_at | TOMM70A   | translocase of o     | 2.37 | 1.24  | 0.00 | 0.00 | 0 | 2.51 | 1.33  | 0.00 | 0.00 | 0 | 3.32 | 1.73  | 0.00 | 0.00 | 1  |
| 201689_s_at | TPD52     | tumor protein D5     | 0.47 | -1.10 | 0.03 | 0.06 | 0 | 0.50 | -1.01 | 0.04 | 0.07 | 0 | 0.27 | -1.92 | 0.00 | 0.00 | -1 |
| 210372_s_at | TPD52L1   | tumor protein D5     | 2.17 | 1.12  | 0.03 | 0.05 | 0 | 2.81 | 1.49  | 0.00 | 0.00 | 0 | 4.46 | 2.16  | 0.00 | 0.00 | 1  |
| 210986_s_at | TPM1      | tropomyosin 1 (a     | 1.60 | 0.68  | 0.15 | 0.23 | 0 | 2.50 | 1.32  | 0.01 | 0.01 | 0 | 5.65 | 2.50  | 0.00 | 0.00 | 1  |
| 206116_s_at | TPM1      | tropomyosin 1 (a     | 0.95 | -0.07 | 0.91 | 0.93 | 0 | 1.73 | 0.79  | 0.19 | 0.27 | 0 | 3.42 | 1.77  | 0.00 | 0.01 | 1  |
| 204079_at   | TPST2     | tyrosylprotein su    | 1.84 | 0.88  | 0.01 | 0.03 | 0 | 2.32 | 1.21  | 0.00 | 0.00 | 0 | 3.21 | 1.68  | 0.00 | 0.00 | 1  |
| 210180_s_at | TRA2B     | transformer 2 be     | 0.40 | -1.32 | 0.00 | 0.01 | 0 | 0.37 | -1.45 | 0.00 | 0.00 | 0 | 0.28 | -1.82 | 0.00 | 0.00 | -1 |
| 213888_s_at | TRAF3IP3  | TRAF3 interactir     | 1.40 | 0.49  | 0.47 | 0.58 | 0 | 1.86 | 0.90  | 0.18 | 0.26 | 0 | 3.39 | 1.76  | 0.01 | 0.02 | 1  |
| 206479_at   | TRPM1     | transient receptc    | 1.17 | 0.22  | 0.71 | 0.79 | 0 | 0.58 | -0.78 | 0.20 | 0.27 | 0 | 0.31 | -1.69 | 0.01 | 0.01 | -1 |
| 205708_s_at | TRPM2     | transient receptc    | 2.12 | 1.09  | 0.00 | 0.00 | 0 | 2.80 | 1.49  | 0.00 | 0.00 | 0 | 3.21 | 1.68  | 0.00 | 0.00 | 1  |
| 209390_at   | TSC1      | tuberous scleros     | 0.41 | -1.30 | 0.00 | 0.00 | 0 | 0.34 | -1.57 | 0.00 | 0.00 | 0 | 0.30 | -1.75 | 0.00 | 0.00 | -1 |
| 203824_at   | TSPAN8    | tetraspanin 8        | 0.39 | -1.37 | 0.01 | 0.02 | 0 | 0.48 | -1.06 | 0.05 | 0.08 | 0 | 0.32 | -1.64 | 0.00 | 0.00 | -1 |
| 212928_at   | TSPYL4    | TSPY-like 4          | 0.46 | -1.14 | 0.00 | 0.00 | 0 | 0.47 | -1.11 | 0.00 | 0.00 | 0 | 0.29 | -1.79 | 0.00 | 0.00 | -1 |
| 219758_at   | TTC26     | tetratricopeptide    | 1.76 | 0.82  | 0.01 | 0.01 | 0 | 2.11 | 1.08  | 0.00 | 0.00 | 0 | 3.04 | 1.61  | 0.00 | 0.00 | 1  |
| 208663_s_at | TTC3      | tetratricopeptide    | 0.53 | -0.92 | 0.00 | 0.00 | 0 | 0.43 | -1.21 | 0.00 | 0.00 | 0 | 0.31 | -1.70 | 0.00 | 0.00 | -1 |
| 203048_s_at | TTC37     | tetratricopeptide    | 0.44 | -1.20 | 0.00 | 0.00 | 0 | 0.43 | -1.24 | 0.00 | 0.00 | 0 | 0.33 | -1.61 | 0.00 | 0.00 | -1 |
| 203049_s_at | TTC37     | tetratricopeptide    | 0.47 | -1.09 | 0.00 | 0.00 | 0 | 0.44 | -1.19 | 0.00 | 0.00 | 0 | 0.32 | -1.64 | 0.00 | 0.00 | -1 |
| 215898_at   | TTL5      | tubulin tyrosine li  | 0.38 | -1.39 | 0.00 | 0.00 | 0 | 0.35 | -1.53 | 0.00 | 0.00 | 0 | 0.33 | -1.62 | 0.00 | 0.00 | -1 |
| 201090_x_at | TUBA1B    | tubulin, alpha 1b    | 2.37 | 1.24  | 0.00 | 0.00 | 0 | 2.98 | 1.58  | 0.00 | 0.00 | 0 | 3.62 | 1.86  | 0.00 | 0.00 | 1  |
| 209191_at   | TUBB6     | tubulin, beta 6      | 1.92 | 0.94  | 0.00 | 0.00 | 0 | 2.73 | 1.45  | 0.00 | 0.00 | 0 | 3.58 | 1.84  | 0.00 | 0.00 | 1  |
| 218184_at   | TULP4     | tubby like proteir   | 0.57 | -0.81 | 0.00 | 0.00 | 0 | 0.34 | -1.55 | 0.00 | 0.00 | 0 | 0.23 | -2.10 | 0.00 | 0.00 | -1 |
| 217497_at   | TYMP      | thymidine phosp      | 2.45 | 1.29  | 0.01 | 0.02 | 0 | 1.68 | 0.75  | 0.12 | 0.18 | 0 | 3.66 | 1.87  | 0.00 | 0.00 | 1  |
| 205694_at   | TYRP1     | tyrosinase-relate    | 0.79 | -0.33 | 0.83 | 0.88 | 0 | 0.45 | -1.16 | 0.46 | 0.54 | 0 | 0.03 | -5.04 | 0.00 | 0.00 | -1 |
| 201534_s_at | UBL3      | ubiquitin-like 3     | 0.43 | -1.21 | 0.00 | 0.00 | 0 | 0.36 | -1.48 | 0.00 | 0.00 | 0 | 0.21 | -2.24 | 0.00 | 0.00 | -1 |
| 208883_at   | UBR5      | ubiquitin protein    | 0.35 | -1.53 | 0.00 | 0.00 | 0 | 0.43 | -1.21 | 0.00 | 0.00 | 0 | 0.30 | -1.74 | 0.00 | 0.00 | -1 |
| 214624_at   | UPK1A     | uropalakin 1A        | 0.40 | -1.33 | 0.00 | 0.00 | 0 | 0.39 | -1.36 | 0.00 | 0.00 | 0 | 0.21 | -2.29 | 0.00 | 0.00 | -1 |
| 212513_s_at | USP33     | ubiquitin specific   | 0.37 | -1.44 | 0.00 | 0.00 | 0 | 0.34 | -1.56 | 0.00 | 0.00 | 0 | 0.31 | -1.70 | 0.00 | 0.00 | -1 |
| 222032_s_at | USP7      | ubiquitin specific   | 0.54 | -0.89 | 0.00 | 0.00 | 0 | 0.43 | -1.21 | 0.00 | 0.00 | 0 | 0.33 | -1.60 | 0.00 | 0.00 | -1 |
| 202745_at   | USP8      | ubiquitin specific   | 0.37 | -1.43 | 0.00 | 0.00 | 0 | 0.36 | -1.49 | 0.00 | 0.00 | 0 | 0.29 | -1.81 | 0.00 | 0.00 | -1 |



|             |         |                    |      |       |      |      |   |      |       |      |      |   |      |       |      |      |    |
|-------------|---------|--------------------|------|-------|------|------|---|------|-------|------|------|---|------|-------|------|------|----|
| 218807_at   | VAV3    | vav 3 guanine nu   | 0.56 | -0.83 | 0.03 | 0.06 | 0 | 0.40 | -1.31 | 0.00 | 0.00 | 0 | 0.24 | -2.08 | 0.00 | 0.00 | -1 |
| 221731_x_at | VCAN    | versican           | 0.67 | -0.58 | 0.46 | 0.57 | 0 | 2.83 | 1.50  | 0.06 | 0.09 | 0 | 4.47 | 2.16  | 0.01 | 0.01 | 1  |
| 209946_at   | VEGFC   | vascular endothe   | 0.98 | -0.04 | 0.95 | 0.96 | 0 | 1.99 | 0.99  | 0.07 | 0.11 | 0 | 6.01 | 2.59  | 0.00 | 0.00 | 1  |
| 217949_s_at | VKORC1  | vitamin K epoxid   | 2.13 | 1.09  | 0.02 | 0.04 | 0 | 2.68 | 1.42  | 0.00 | 0.00 | 0 | 4.14 | 2.05  | 0.00 | 0.00 | 1  |
| 205844_at   | VNN1    | vanin 1            | 1.12 | 0.16  | 0.82 | 0.87 | 0 | 1.28 | 0.35  | 0.62 | 0.69 | 0 | 3.91 | 1.97  | 0.01 | 0.01 | 1  |
| 212267_at   | WAPAL   | wings apart-like l | 0.59 | -0.75 | 0.00 | 0.00 | 0 | 0.36 | -1.48 | 0.00 | 0.00 | 0 | 0.33 | -1.59 | 0.00 | 0.00 | -1 |
| 205810_s_at | WASL    | Wiskott-Aldrich s  | 2.06 | 1.04  | 0.00 | 0.00 | 0 | 2.21 | 1.14  | 0.00 | 0.00 | 0 | 3.00 | 1.59  | 0.00 | 0.00 | 1  |
| 218505_at   | WDR59   | WD repeat domæ     | 0.78 | -0.36 | 0.21 | 0.31 | 0 | 0.42 | -1.24 | 0.00 | 0.00 | 0 | 0.33 | -1.62 | 0.00 | 0.00 | -1 |
| 210861_s_at | WISP3   | WNT1 inducible     | 2.00 | 1.00  | 0.11 | 0.18 | 0 | 1.68 | 0.75  | 0.22 | 0.30 | 0 | 4.80 | 2.26  | 0.00 | 0.00 | 1  |
| 221783_at   | WIZ     | widely interspac   | 2.79 | 1.48  | 0.00 | 0.00 | 0 | 2.69 | 1.43  | 0.00 | 0.00 | 0 | 3.36 | 1.75  | 0.00 | 0.00 | 1  |
| 213155_at   | WSCD1   | WSC domain coi     | 0.39 | -1.35 | 0.00 | 0.00 | 0 | 0.36 | -1.47 | 0.00 | 0.00 | 0 | 0.33 | -1.61 | 0.00 | 0.00 | -1 |
| 206698_at   | XK      | X-linked Kx bloo   | 0.52 | -0.96 | 0.01 | 0.03 | 0 | 0.40 | -1.32 | 0.00 | 0.00 | 0 | 0.29 | -1.78 | 0.00 | 0.00 | -1 |
| 209375_at   | XPC     | xeroderma pigm     | 0.68 | -0.56 | 0.17 | 0.26 | 0 | 0.40 | -1.34 | 0.00 | 0.00 | 0 | 0.32 | -1.63 | 0.00 | 0.00 | -1 |
| 205071_x_at | XRCC4   | X-ray repair com   | 1.75 | 0.81  | 0.03 | 0.07 | 0 | 2.79 | 1.48  | 0.00 | 0.00 | 0 | 3.59 | 1.84  | 0.00 | 0.00 | 1  |
| 220207_at   | YIF1B   | Yip1 interacting l | 2.03 | 1.02  | 0.00 | 0.00 | 0 | 2.27 | 1.18  | 0.00 | 0.00 | 0 | 3.17 | 1.67  | 0.00 | 0.00 | 1  |
| 214659_x_at | YLPM1   | YLP motif contai   | 0.55 | -0.86 | 0.05 | 0.09 | 0 | 0.39 | -1.34 | 0.00 | 0.00 | 0 | 0.32 | -1.64 | 0.00 | 0.00 | -1 |
| 213077_at   | YTHDC2  | YTH domain con     | 0.44 | -1.18 | 0.00 | 0.00 | 0 | 0.37 | -1.45 | 0.00 | 0.00 | 0 | 0.29 | -1.80 | 0.00 | 0.00 | -1 |
| 213376_at   | ZBTB1   | zinc finger and B  | 0.34 | -1.54 | 0.00 | 0.00 | 0 | 0.37 | -1.44 | 0.00 | 0.00 | 0 | 0.26 | -1.93 | 0.00 | 0.00 | -1 |
| 222357_at   | ZBTB20  | zinc finger and B  | 0.45 | -1.15 | 0.01 | 0.02 | 0 | 0.36 | -1.47 | 0.00 | 0.00 | 0 | 0.23 | -2.14 | 0.00 | 0.00 | -1 |
| 217741_s_at | ZFAND5  | zinc finger, AN1-  | 3.00 | 1.58  | 0.00 | 0.00 | 0 | 2.59 | 1.37  | 0.00 | 0.00 | 0 | 3.35 | 1.74  | 0.00 | 0.00 | 1  |
| 210281_s_at | ZMYM2   | zinc finger, MYM   | 0.42 | -1.26 | 0.01 | 0.02 | 0 | 0.41 | -1.29 | 0.01 | 0.01 | 0 | 0.29 | -1.79 | 0.00 | 0.00 | -1 |
| 210282_at   | ZMYM2   | zinc finger, MYM   | 0.51 | -0.98 | 0.06 | 0.11 | 0 | 0.51 | -0.97 | 0.06 | 0.10 | 0 | 0.29 | -1.80 | 0.00 | 0.00 | -1 |
| 204234_s_at | ZNF195  | zinc finger protei | 0.45 | -1.14 | 0.01 | 0.02 | 0 | 0.39 | -1.35 | 0.00 | 0.00 | 0 | 0.26 | -1.92 | 0.00 | 0.00 | -1 |
| 213269_at   | ZNF248  | zinc finger protei | 0.46 | -1.13 | 0.00 | 0.00 | 0 | 0.42 | -1.25 | 0.00 | 0.00 | 0 | 0.23 | -2.10 | 0.00 | 0.00 | -1 |
| 212366_at   | ZNF292  | zinc finger protei | 0.44 | -1.19 | 0.00 | 0.00 | 0 | 0.34 | -1.54 | 0.00 | 0.00 | 0 | 0.25 | -2.02 | 0.00 | 0.00 | -1 |
| 212557_at   | ZNF451  | zinc finger protei | 0.49 | -1.04 | 0.00 | 0.00 | 0 | 0.33 | -1.58 | 0.00 | 0.00 | 0 | 0.31 | -1.69 | 0.00 | 0.00 | -1 |
| 55872_at    | ZNF512B | zinc finger protei | 0.54 | -0.89 | 0.01 | 0.02 | 0 | 0.43 | -1.21 | 0.00 | 0.00 | 0 | 0.26 | -1.95 | 0.00 | 0.00 | -1 |
| 215019_x_at | ZNF528  | zinc finger protei | 2.61 | 1.39  | 0.00 | 0.00 | 0 | 2.93 | 1.55  | 0.00 | 0.00 | 0 | 3.17 | 1.66  | 0.00 | 0.00 | 1  |
| 206648_at   | ZNF571  | zinc finger protei | 0.56 | -0.84 | 0.15 | 0.23 | 0 | 0.50 | -1.00 | 0.09 | 0.13 | 0 | 0.28 | -1.85 | 0.00 | 0.00 | -1 |
| 204175_at   | ZNF593  | zinc finger protei | 2.73 | 1.45  | 0.00 | 0.00 | 0 | 2.50 | 1.32  | 0.00 | 0.00 | 0 | 4.11 | 2.04  | 0.00 | 0.00 | 1  |
| 220760_x_at | ZNF665  | zinc finger protei | 0.44 | -1.18 | 0.00 | 0.00 | 0 | 0.34 | -1.55 | 0.00 | 0.00 | 0 | 0.31 | -1.69 | 0.00 | 0.00 | -1 |
| 219627_at   | ZNF767  | zinc finger family | 0.61 | -0.71 | 0.03 | 0.05 | 0 | 0.35 | -1.52 | 0.00 | 0.00 | 0 | 0.27 | -1.87 | 0.00 | 0.00 | -1 |
| 219676_at   | ZSCAN16 | zinc finger and S  | 0.70 | -0.51 | 0.28 | 0.38 | 0 | 0.56 | -0.85 | 0.07 | 0.12 | 0 | 0.28 | -1.86 | 0.00 | 0.00 | -1 |
| 221059_s_at |         |                    | 2.06 | 1.04  | 0.01 | 0.02 | 0 | 2.96 | 1.57  | 0.00 | 0.00 | 0 | 7.63 | 2.93  | 0.00 | 0.00 | 1  |
| 204438_at   |         |                    | 1.42 | 0.50  | 0.29 | 0.39 | 0 | 2.45 | 1.29  | 0.01 | 0.01 | 0 | 7.28 | 2.87  | 0.00 | 0.00 | 1  |
| 214290_s_at |         |                    | 2.13 | 1.09  | 0.02 | 0.04 | 0 | 2.83 | 1.50  | 0.00 | 0.00 | 0 | 4.90 | 2.29  | 0.00 | 0.00 | 1  |
| 205980_s_at |         |                    | 2.22 | 1.15  | 0.02 | 0.04 | 0 | 2.06 | 1.04  | 0.03 | 0.06 | 0 | 4.03 | 2.01  | 0.00 | 0.00 | 1  |
| 210915_x_at |         |                    | 2.39 | 1.26  | 0.02 | 0.04 | 0 | 2.78 | 1.48  | 0.01 | 0.01 | 0 | 4.03 | 2.01  | 0.00 | 0.00 | 1  |
| 206302_s_at |         |                    | 1.50 | 0.59  | 0.26 | 0.37 | 0 | 2.83 | 1.50  | 0.01 | 0.01 | 0 | 3.95 | 1.98  | 0.00 | 0.00 | 1  |
| 200885_at   |         |                    | 2.16 | 1.11  | 0.01 | 0.03 | 0 | 2.26 | 1.18  | 0.01 | 0.01 | 0 | 3.82 | 1.93  | 0.00 | 0.00 | 1  |
| 220445_s_at |         |                    | 1.85 | 0.89  | 0.04 | 0.07 | 0 | 2.90 | 1.54  | 0.00 | 0.00 | 0 | 3.49 | 1.80  | 0.00 | 0.00 | 1  |
| 218280_x_at |         |                    | 2.13 | 1.09  | 0.01 | 0.01 | 0 | 2.43 | 1.28  | 0.00 | 0.00 | 0 | 3.46 | 1.79  | 0.00 | 0.00 | 1  |
| 212444_at   |         |                    | 1.53 | 0.61  | 0.07 | 0.13 | 0 | 1.45 | 0.54  | 0.11 | 0.17 | 0 | 3.42 | 1.78  | 0.00 | 0.00 | 1  |
| 208540_x_at |         |                    | 1.87 | 0.90  | 0.01 | 0.02 | 0 | 2.63 | 1.40  | 0.00 | 0.00 | 0 | 3.37 | 1.75  | 0.00 | 0.00 | 1  |
| 221969_at   |         |                    | 2.66 | 1.41  | 0.03 | 0.05 | 0 | 2.56 | 1.35  | 0.03 | 0.05 | 0 | 3.34 | 1.74  | 0.01 | 0.01 | 1  |
| 205890_s_at |         |                    | 1.23 | 0.30  | 0.66 | 0.75 | 0 | 2.35 | 1.23  | 0.08 | 0.12 | 0 | 3.25 | 1.70  | 0.02 | 0.03 | 1  |
| 217998_at   |         |                    | 2.57 | 1.36  | 0.00 | 0.00 | 0 | 2.65 | 1.41  | 0.00 | 0.00 | 0 | 3.18 | 1.67  | 0.00 | 0.00 | 1  |
| 216668_at   |         |                    | 3.00 | 1.58  | 0.00 | 0.00 | 0 | 2.81 | 1.49  | 0.00 | 0.00 | 0 | 3.13 | 1.65  | 0.00 | 0.00 | 1  |

|             |      |       |      |      |   |      |       |      |      |   |      |       |      |      |    |
|-------------|------|-------|------|------|---|------|-------|------|------|---|------|-------|------|------|----|
| 205272_s_at | 2.98 | 1.57  | 0.00 | 0.00 | 0 | 2.73 | 1.45  | 0.00 | 0.00 | 0 | 3.08 | 1.62  | 0.00 | 0.00 | 1  |
| 213212_x_at | 0.53 | -0.91 | 0.02 | 0.04 | 0 | 0.45 | -1.14 | 0.00 | 0.00 | 0 | 0.33 | -1.59 | 0.00 | 0.00 | -1 |
| 216628_at   | 0.33 | -1.58 | 0.00 | 0.00 | 0 | 0.34 | -1.58 | 0.00 | 0.00 | 0 | 0.33 | -1.59 | 0.00 | 0.00 | -1 |
| 200856_x_at | 0.48 | -1.07 | 0.01 | 0.02 | 0 | 0.52 | -0.93 | 0.02 | 0.04 | 0 | 0.32 | -1.64 | 0.00 | 0.00 | -1 |
| 213739_at   | 0.40 | -1.31 | 0.00 | 0.00 | 0 | 0.40 | -1.34 | 0.00 | 0.00 | 0 | 0.32 | -1.63 | 0.00 | 0.00 | -1 |
| 222375_at   | 0.39 | -1.36 | 0.00 | 0.00 | 0 | 0.34 | -1.55 | 0.00 | 0.00 | 0 | 0.32 | -1.65 | 0.00 | 0.00 | -1 |
| 206848_at   | 0.82 | -0.29 | 0.50 | 0.61 | 0 | 0.43 | -1.24 | 0.01 | 0.01 | 0 | 0.32 | -1.66 | 0.00 | 0.00 | -1 |
| 214808_at   | 0.75 | -0.42 | 0.39 | 0.50 | 0 | 0.45 | -1.15 | 0.02 | 0.04 | 0 | 0.31 | -1.70 | 0.00 | 0.00 | -1 |
| 217554_at   | 0.60 | -0.74 | 0.08 | 0.13 | 0 | 0.45 | -1.16 | 0.01 | 0.01 | 0 | 0.31 | -1.71 | 0.00 | 0.00 | -1 |
| 219151_s_at | 0.60 | -0.74 | 0.07 | 0.13 | 0 | 0.34 | -1.57 | 0.00 | 0.00 | 0 | 0.30 | -1.72 | 0.00 | 0.00 | -1 |
| 215578_at   | 0.40 | -1.33 | 0.00 | 0.00 | 0 | 0.36 | -1.47 | 0.00 | 0.00 | 0 | 0.30 | -1.72 | 0.00 | 0.00 | -1 |
| 215140_at   | 0.33 | -1.58 | 0.00 | 0.00 | 0 | 0.37 | -1.46 | 0.00 | 0.00 | 0 | 0.30 | -1.73 | 0.00 | 0.00 | -1 |
| 212920_at   | 0.36 | -1.50 | 0.00 | 0.00 | 0 | 0.36 | -1.49 | 0.00 | 0.00 | 0 | 0.30 | -1.74 | 0.00 | 0.00 | -1 |
| 222159_at   | 0.37 | -1.45 | 0.00 | 0.00 | 0 | 0.48 | -1.06 | 0.00 | 0.00 | 0 | 0.30 | -1.75 | 0.00 | 0.00 | -1 |
| 204060_s_at | 0.73 | -0.46 | 0.32 | 0.43 | 0 | 0.47 | -1.08 | 0.02 | 0.04 | 0 | 0.30 | -1.75 | 0.00 | 0.00 | -1 |
| 213971_s_at | 0.45 | -1.17 | 0.00 | 0.00 | 0 | 0.38 | -1.40 | 0.00 | 0.00 | 0 | 0.30 | -1.75 | 0.00 | 0.00 | -1 |
| 220175_s_at | 0.58 | -0.78 | 0.00 | 0.00 | 0 | 0.38 | -1.40 | 0.00 | 0.00 | 0 | 0.29 | -1.77 | 0.00 | 0.00 | -1 |
| 217610_at   | 0.51 | -0.97 | 0.03 | 0.06 | 0 | 0.35 | -1.50 | 0.00 | 0.00 | 0 | 0.29 | -1.77 | 0.00 | 0.00 | -1 |
| 208078_s_at | 0.75 | -0.42 | 0.41 | 0.52 | 0 | 0.35 | -1.50 | 0.01 | 0.01 | 0 | 0.29 | -1.80 | 0.00 | 0.00 | -1 |
| 217653_x_at | 0.64 | -0.64 | 0.07 | 0.12 | 0 | 0.35 | -1.53 | 0.00 | 0.00 | 0 | 0.29 | -1.79 | 0.00 | 0.00 | -1 |
| 212182_at   | 0.38 | -1.40 | 0.00 | 0.00 | 0 | 0.36 | -1.47 | 0.00 | 0.00 | 0 | 0.28 | -1.85 | 0.00 | 0.00 | -1 |
| 222372_at   | 0.36 | -1.49 | 0.02 | 0.03 | 0 | 0.40 | -1.34 | 0.03 | 0.05 | 0 | 0.27 | -1.87 | 0.00 | 0.00 | -1 |
| 217586_x_at | 0.58 | -0.79 | 0.04 | 0.07 | 0 | 0.34 | -1.56 | 0.00 | 0.00 | 0 | 0.27 | -1.88 | 0.00 | 0.00 | -1 |
| 220033_at   | 0.45 | -1.15 | 0.00 | 0.00 | 0 | 0.37 | -1.46 | 0.00 | 0.00 | 0 | 0.27 | -1.88 | 0.00 | 0.00 | -1 |
| 214945_at   | 1.62 | 0.69  | 0.34 | 0.45 | 0 | 0.41 | -1.30 | 0.08 | 0.13 | 0 | 0.27 | -1.90 | 0.01 | 0.02 | -1 |
| 212842_x_at | 0.40 | -1.31 | 0.00 | 0.00 | 0 | 0.41 | -1.29 | 0.00 | 0.00 | 0 | 0.27 | -1.90 | 0.00 | 0.00 | -1 |
| 216094_at   | 0.38 | -1.38 | 0.00 | 0.00 | 0 | 0.40 | -1.34 | 0.00 | 0.00 | 0 | 0.26 | -1.95 | 0.00 | 0.00 | -1 |
| 210410_s_at | 0.45 | -1.16 | 0.00 | 0.01 | 0 | 0.34 | -1.54 | 0.00 | 0.00 | 0 | 0.25 | -2.02 | 0.00 | 0.00 | -1 |
| 215545_at   | 0.37 | -1.44 | 0.00 | 0.00 | 0 | 0.40 | -1.33 | 0.00 | 0.00 | 0 | 0.24 | -2.04 | 0.00 | 0.00 | -1 |
| 217690_at   | 0.65 | -0.62 | 0.20 | 0.29 | 0 | 0.52 | -0.96 | 0.05 | 0.08 | 0 | 0.22 | -2.18 | 0.00 | 0.00 | -1 |
| 215191_at   | 0.68 | -0.55 | 0.29 | 0.40 | 0 | 0.34 | -1.55 | 0.00 | 0.01 | 0 | 0.16 | -2.68 | 0.00 | 0.00 | -1 |
| 215204_at   | 0.97 | -0.04 | 0.93 | 0.95 | 0 | 0.37 | -1.42 | 0.00 | 0.00 | 0 | 0.12 | -3.07 | 0.00 | 0.00 | -1 |

**Table S2. AK vs. normal epidermis (FCH>3.0 and FDR<0.05)**

724 up- and 820 down-regulated probestes

| Probe       | Symbol   | Description         | FCH   | lgFCH | P     | fdr  | fdr  |
|-------------|----------|---------------------|-------|-------|-------|------|------|
| 219574_at   |          | 1-Mar membrane-asso | 0.28  |       | -1.85 | 0.00 | 0.00 |
| 201737_s_at |          | 6-Mar membrane-asso | 0.16  |       | -2.63 | 0.00 | 0.00 |
| 219488_at   | A4GALT   | alpha 1,4-galact    | 3.44  |       | 1.78  | 0.00 | 0.00 |
| 201511_at   | AAMP     | angio-associat      | 3.42  |       | 1.78  | 0.00 | 0.00 |
| 209460_at   | ABAT     | 4-aminobutyrate     | 0.16  |       | -2.64 | 0.00 | 0.00 |
| 209459_s_at | ABAT     | 4-aminobutyrate     | 0.08  |       | -3.58 | 0.00 | 0.00 |
| 220159_at   | ABCA11P  | ATP-binding cas     | 0.28  |       | -1.82 | 0.00 | 0.00 |
| 210082_at   | ABCA4    | ATP-binding cas     | 4.01  |       | 2.00  | 0.00 | 0.00 |
| 204719_at   | ABCA8    | ATP-binding cas     | 0.29  |       | -1.80 | 0.00 | 0.00 |
| 203196_at   | ABCC4    | ATP-binding cas     | 0.21  |       | -2.24 | 0.00 | 0.00 |
| 209380_s_at | ABCC5    | ATP-binding cas     | 3.93  |       | 1.97  | 0.00 | 0.00 |
| 209247_s_at | ABCF2    | ATP-binding cas     | 3.16  |       | 1.66  | 0.00 | 0.00 |
| 207593_at   | ABCG4    | ATP-binding cas     | 3.02  |       | 1.59  | 0.00 | 0.00 |
| 205566_at   | ABHD2    | abhydrolase don     | 3.20  |       | 1.68  | 0.00 | 0.00 |
| 202025_x_at | ACAA1    | acetyl-Coenzym      | 3.12  |       | 1.64  | 0.00 | 0.00 |
| 206069_s_at | ACADL    | acyl-Coenzyme ,     | 0.19  |       | -2.43 | 0.00 | 0.00 |
| 206068_s_at | ACADL    | acyl-Coenzyme ,     | 0.06  |       | -4.12 | 0.00 | 0.00 |
| 212477_at   | ACAP2    | ArfGAP with coil    | 3.28  |       | 1.71  | 0.00 | 0.00 |
| 210337_s_at | ACLY     | ATP citrate lyase   | 4.33  |       | 2.11  | 0.00 | 0.00 |
| 200793_s_at | ACO2     | aconitase 2, mitc   | 3.71  |       | 1.89  | 0.00 | 0.00 |
| 214763_at   | ACOT11   | acyl-CoA thioest    | 4.20  |       | 2.07  | 0.00 | 0.00 |
| 204393_s_at | ACPP     | acid phosphatas     | 3.78  |       | 1.92  | 0.01 | 0.01 |
| 201661_s_at | ACSL3    | acyl-CoA synthe     | 0.31  |       | -1.71 | 0.00 | 0.00 |
| 202422_s_at | ACSL4    | acyl-CoA synthe     | 0.18  |       | -2.45 | 0.00 | 0.00 |
| 208636_at   | ACTN1    | actinin, alpha 1    | 3.37  |       | 1.75  | 0.00 | 0.00 |
| 200729_s_at | ACTR2    | ARP2 actin-relat    | 0.30  |       | -1.73 | 0.00 | 0.01 |
| 205209_at   | ACVR1B   | activin A recepto   | 0.26  |       | -1.96 | 0.00 | 0.00 |
| 208268_at   | ADAM28   | ADAM metallope      | 0.29  |       | -1.81 | 0.00 | 0.00 |
| 220208_at   | ADAMTS13 | ADAM metallope      | 4.42  |       | 2.14  | 0.00 | 0.00 |
| 204497_at   | ADCY9    | adenylate cyclas    | 4.09  |       | 2.03  | 0.00 | 0.00 |
| 204498_s_at | ADCY9    | adenylate cyclas    | 3.69  |       | 1.88  | 0.00 | 0.00 |
| 209614_at   | ADH1B    | alcohol dehydroq    | 0.32  |       | -1.66 | 0.00 | 0.00 |
| 204120_s_at | ADK      | adenosine kinas     | 0.27  |       | -1.90 | 0.00 | 0.00 |
| 220538_at   | ADM2     | adrenomedullin ;    | 4.53  |       | 2.18  | 0.00 | 0.00 |
| 38447_at    | ADRBK1   | adrenergic, beta    | 11.08 |       | 3.47  | 0.00 | 0.00 |
| 201402_at   | ADRBK1   | adrenergic, beta    | 8.19  |       | 3.03  | 0.00 | 0.00 |
| 219361_s_at | AEN      | apoptosis enhan     | 3.06  |       | 1.62  | 0.00 | 0.00 |
| 208042_at   | AGGF1    | angiogenic facto    | 0.21  |       | -2.27 | 0.00 | 0.00 |
| 200903_s_at | AHCY     | adenosylhomoc       | 3.47  |       | 1.80  | 0.00 | 0.00 |
| 203156_at   | AKAP11   | A kinase (PRKA)     | 0.32  |       | -1.65 | 0.00 | 0.00 |
| 222024_s_at | AKAP13   | A kinase (PRKA)     | 0.29  |       | -1.80 | 0.00 | 0.00 |

|             |          |                    |       |       |      |      |
|-------------|----------|--------------------|-------|-------|------|------|
| 205771_s_at | AKAP7    | A kinase (PRKA     | 0.15  | -2.77 | 0.00 | 0.00 |
| 215741_x_at | AKAP8L   | A kinase (PRKA     | 4.25  | 2.09  | 0.00 | 0.00 |
| 215483_at   | AKAP9    | A kinase (PRKA     | 0.13  | -2.91 | 0.00 | 0.00 |
| 206561_s_at | AKR1B10  | aldo-keto reduct   | 21.41 | 4.42  | 0.00 | 0.00 |
| 201951_at   | ALCAM    | activated leukoc   | 0.13  | -2.93 | 0.00 | 0.00 |
| 204942_s_at | ALDH3B2  | aldehyde dehydr    | 4.06  | 2.02  | 0.00 | 0.01 |
| 211552_s_at | ALDH4A1  | aldehyde dehydr    | 5.76  | 2.53  | 0.00 | 0.00 |
| 216600_x_at | ALDOB    | aldolase B, fruct  | 3.56  | 1.83  | 0.00 | 0.00 |
| 206714_at   | ALOX15B  | arachidonate 15-   | 3.25  | 1.70  | 0.01 | 0.01 |
| 202204_s_at | AMFR     | autocrine motility | 4.05  | 2.02  | 0.00 | 0.00 |
| 202203_s_at | AMFR     | autocrine motility | 0.24  | -2.06 | 0.00 | 0.00 |
| 203002_at   | AMOTL2   | angiotenin like 2  | 0.31  | -1.69 | 0.00 | 0.00 |
| 207845_s_at | ANAPC10  | anaphase promc     | 0.31  | -1.69 | 0.00 | 0.00 |
| 221009_s_at | ANGPTL4  | angiopoietin-like  | 5.43  | 2.44  | 0.00 | 0.00 |
| 215314_at   | ANK3     | ankyrin 3, node c  | 0.32  | -1.63 | 0.00 | 0.00 |
| 218769_s_at | ANKRA2   | ankyrin repeat, fi | 0.30  | -1.74 | 0.00 | 0.00 |
| 214723_x_at | ANKRD36  | ankyrin repeat di  | 0.10  | -3.33 | 0.00 | 0.00 |
| 212731_at   | ANKRD46  | ankyrin repeat di  | 0.32  | -1.64 | 0.00 | 0.00 |
| 218261_at   | AP1M2    | adaptor-related t  | 3.12  | 1.64  | 0.00 | 0.00 |
| 204859_s_at | APAF1    | apoptotic peptid   | 0.23  | -2.15 | 0.00 | 0.00 |
| 209870_s_at | APBA2    | amyloid beta (A4   | 5.53  | 2.47  | 0.00 | 0.00 |
| 210873_x_at | APOBEC3A | apolipoprotein B   | 7.61  | 2.93  | 0.00 | 0.00 |
| 215579_at   | APOBEC3G | apolipoprotein B   | 3.81  | 1.93  | 0.00 | 0.00 |
| 204416_x_at | APOC1    | apolipoprotein C   | 3.17  | 1.66  | 0.00 | 0.00 |
| 213289_at   | APOOL    | apolipoprotein O   | 0.33  | -1.60 | 0.00 | 0.00 |
| 218218_at   | APPL2    | adaptor protein,   | 0.27  | -1.91 | 0.00 | 0.00 |
| 210090_at   | ARC      | activity-regulatec | 3.17  | 1.66  | 0.00 | 0.00 |
| 205239_at   | AREG     | amphiregulin       | 10.27 | 3.36  | 0.00 | 0.00 |
| 202955_s_at | ARFGEF1  | ADP-ribosylation   | 3.73  | 1.90  | 0.00 | 0.00 |
| 218098_at   | ARFGEF2  | ADP-ribosylation   | 0.31  | -1.67 | 0.00 | 0.00 |
| 201333_s_at | ARHGEF12 | Rho guanine nuc    | 3.65  | 1.87  | 0.00 | 0.00 |
| 201228_s_at | ARIH2    | ariadne homolog    | 3.01  | 1.59  | 0.00 | 0.00 |
| 201229_s_at | ARIH2    | ariadne homolog    | 0.27  | -1.90 | 0.00 | 0.00 |
| 218185_s_at | ARMC1    | armadillo repeat   | 0.28  | -1.84 | 0.00 | 0.00 |
| 219094_at   | ARMC8    | armadillo repeat   | 0.30  | -1.72 | 0.00 | 0.00 |
| 218694_at   | ARMCX1   | armadillo repeat   | 0.13  | -3.00 | 0.00 | 0.00 |
| 217858_s_at | ARMCX3   | armadillo repeat   | 0.31  | -1.68 | 0.00 | 0.00 |
| 210971_s_at | ARNTL    | aryl hydrocarbon   | 0.22  | -2.19 | 0.00 | 0.00 |
| 201954_at   | ARPC1B   | actin related proi | 3.23  | 1.69  | 0.00 | 0.00 |
| 214490_at   | ARSF     | arylsulfatase F    | 4.06  | 2.02  | 0.00 | 0.00 |
| 205784_x_at | ARVCF    | armadillo repeat   | 3.29  | 1.72  | 0.00 | 0.00 |
| 203427_at   | ASF1A    | ASF1 anti-silenc   | 0.23  | -2.15 | 0.00 | 0.00 |
| 218115_at   | ASF1B    | ASF1 anti-silenc   | 3.97  | 1.99  | 0.00 | 0.00 |
| 209517_s_at | ASH2L    | ash2 (absent, sn   | 3.18  | 1.67  | 0.00 | 0.00 |
| 209135_at   | ASPH     | aspartate beta-h   | 0.28  | -1.85 | 0.00 | 0.00 |
| 219068_x_at | ATAD3A   | ATPase family, /   | 4.15  | 2.05  | 0.00 | 0.00 |
| 222103_at   | ATF1     | activating transc  | 0.30  | -1.76 | 0.00 | 0.00 |
| 203168_at   | ATF6B    | activating transc  | 3.17  | 1.67  | 0.00 | 0.00 |

|             |          |                   |      |       |      |      |
|-------------|----------|-------------------|------|-------|------|------|
| 216197_at   | ATF7IP   | activating transc | 0.21 | -2.28 | 0.00 | 0.00 |
| 202492_at   | ATG9A    | ATG9 autophagy    | 3.12 | 1.64  | 0.00 | 0.00 |
| 40489_at    | ATN1     | atrophin 1        | 5.70 | 2.51  | 0.00 | 0.00 |
| 203454_s_at | ATOX1    | ATX1 antioxidant  | 3.47 | 1.80  | 0.00 | 0.00 |
| 214070_s_at | ATP10B   | ATPase, class V   | 4.99 | 2.32  | 0.00 | 0.00 |
| 213582_at   | ATP11A   | ATPase, class V   | 0.21 | -2.26 | 0.00 | 0.00 |
| 207367_at   | ATP12A   | ATPase, H+/K+ a   | 8.76 | 3.13  | 0.00 | 0.00 |
| 212297_at   | ATP13A3  | ATPase type 13,   | 0.30 | -1.75 | 0.00 | 0.00 |
| 215716_s_at | ATP2B1   | ATPase, Ca++ tr   | 0.26 | -1.92 | 0.00 | 0.00 |
| 212930_at   | ATP2B1   | ATPase, Ca++ tr   | 0.12 | -3.12 | 0.00 | 0.00 |
| 205198_s_at | ATP7A    | ATPase, Cu++ tr   | 0.32 | -1.66 | 0.00 | 0.00 |
| 213106_at   | ATP8A1   | ATPase, aminop    | 0.24 | -2.07 | 0.00 | 0.00 |
| 214010_s_at | ATP9B    | ATPase, class II  | 3.10 | 1.63  | 0.00 | 0.00 |
| 204516_at   | ATXN7    | ataxin 7          | 0.32 | -1.64 | 0.00 | 0.00 |
| 205539_at   | AVIL     | advillin          | 0.31 | -1.68 | 0.00 | 0.00 |
| 218631_at   | AVPI1    | arginine vasopre  | 3.30 | 1.72  | 0.00 | 0.00 |
| 208260_at   | AVPR1B   | arginine vasopre  | 8.25 | 3.05  | 0.00 | 0.00 |
| 202984_s_at | BAG5     | BCL2-associated   | 0.21 | -2.23 | 0.00 | 0.00 |
| 210419_at   | BARX2    | BARX homeobox     | 3.03 | 1.60  | 0.00 | 0.00 |
| 208132_x_at | BAT2     | HLA-B associate   | 3.24 | 1.69  | 0.00 | 0.00 |
| 201355_s_at | BAZ2A    | bromodomain ac    | 3.00 | 1.59  | 0.00 | 0.00 |
| 219487_at   | BBS10    | Bardet-Biedl syn  | 0.30 | -1.76 | 0.00 | 0.00 |
| 37547_at    | BBS9     | Bardet-Biedl syn  | 0.33 | -1.59 | 0.00 | 0.01 |
| 91920_at    | BCAN     | brevican          | 6.85 | 2.78  | 0.00 | 0.00 |
| 205084_at   | BCAP29   | B-cell receptor-a | 0.32 | -1.66 | 0.00 | 0.00 |
| 204032_at   | BCAR3    | breast cancer an  | 0.11 | -3.17 | 0.00 | 0.00 |
| 215990_s_at | BCL6     | B-cell CLL/lymph  | 0.17 | -2.54 | 0.00 | 0.00 |
| 219072_at   | BCL7C    | B-cell CLL/lymph  | 3.67 | 1.88  | 0.00 | 0.00 |
| 204129_at   | BCL9     | B-cell CLL/lymph  | 3.61 | 1.85  | 0.00 | 0.00 |
| 219433_at   | BCOR     | BCL6 co-repress   | 0.30 | -1.73 | 0.00 | 0.00 |
| 211725_s_at | BID      | BH3 interacting c | 3.29 | 1.72  | 0.00 | 0.00 |
| 214439_x_at | BIN1     | bridging integrat | 4.33 | 2.12  | 0.00 | 0.00 |
| 202931_x_at | BIN1     | bridging integrat | 3.72 | 1.89  | 0.00 | 0.00 |
| 219191_s_at | BIN2     | bridging integrat | 4.72 | 2.24  | 0.00 | 0.00 |
| 210538_s_at | BIRC3    | baculoviral IAP r | 0.33 | -1.59 | 0.00 | 0.00 |
| 206725_x_at | BMP1     | bone morphogen    | 3.29 | 1.72  | 0.00 | 0.00 |
| 205289_at   | BMP2     | bone morphogen    | 0.15 | -2.79 | 0.00 | 0.00 |
| 37170_at    | BMP2K    | BMP2 inducible    | 0.33 | -1.62 | 0.00 | 0.00 |
| 214716_at   | BMP2K    | BMP2 inducible    | 0.30 | -1.74 | 0.00 | 0.00 |
| 220203_at   | BMP8A    | bone morphogen    | 8.29 | 3.05  | 0.00 | 0.00 |
| 206044_s_at | BRAF     | v-raf murine sarc | 4.34 | 2.12  | 0.00 | 0.00 |
| 214820_at   | BRWD1    | bromodomain ar    | 0.26 | -1.93 | 0.00 | 0.00 |
| 207326_at   | BTC      | betacellulin      | 0.08 | -3.58 | 0.00 | 0.00 |
| 204901_at   | BTRC     | beta-transducin   | 4.20 | 2.07  | 0.00 | 0.00 |
| 218299_at   | C11orf24 | chromosome 11     | 5.23 | 2.39  | 0.00 | 0.00 |
| 204218_at   | C11orf51 | chromosome 11     | 3.16 | 1.66  | 0.00 | 0.00 |
| 221208_s_at | C11orf61 | chromosome 11     | 0.32 | -1.66 | 0.00 | 0.00 |
| 220141_at   | C11orf63 | chromosome 11     | 0.14 | -2.88 | 0.00 | 0.00 |

|             |           |                  |       |       |      |      |
|-------------|-----------|------------------|-------|-------|------|------|
| 64432_at    | C12orf47  | chromosome 12    | 0.13  | -2.90 | 0.00 | 0.00 |
| 221777_at   | C12orf52  | chromosome 12    | 3.07  | 1.62  | 0.00 | 0.00 |
| 218420_s_at | C13orf23  | chromosome 13    | 3.25  | 1.70  | 0.00 | 0.00 |
| 219166_at   | C14orf104 | chromosome 14    | 0.24  | -2.04 | 0.00 | 0.00 |
| 206500_s_at | C14orf106 | chromosome 14    | 0.26  | -1.96 | 0.00 | 0.00 |
| 208109_s_at | C15orf5   | chromosome 15    | 0.27  | -1.89 | 0.00 | 0.00 |
| 219556_at   | C16orf59  | chromosome 16    | 4.33  | 2.12  | 0.00 | 0.00 |
| 203830_at   | C17orf75  | chromosome 17    | 0.21  | -2.29 | 0.00 | 0.00 |
| 217539_at   | C18orf25  | chromosome 18    | 0.30  | -1.74 | 0.00 | 0.00 |
| 212925_at   | C19orf21  | chromosome 19    | 6.91  | 2.79  | 0.00 | 0.00 |
| 55705_at    | C19orf22  | chromosome 19    | 3.97  | 1.99  | 0.00 | 0.00 |
| 220178_at   | C19orf28  | chromosome 19    | 3.03  | 1.60  | 0.00 | 0.00 |
| 206901_at   | C19orf57  | chromosome 19    | 5.86  | 2.55  | 0.00 | 0.00 |
| 219856_at   | C1orf116  | chromosome 1 c   | 3.31  | 1.73  | 0.00 | 0.00 |
| 212003_at   | C1orf144  | chromosome 1 c   | 3.10  | 1.63  | 0.00 | 0.00 |
| 213528_at   | C1orf156  | chromosome 1 c   | 0.23  | -2.11 | 0.00 | 0.00 |
| 220992_s_at | C1orf25   | chromosome 1 c   | 0.33  | -1.62 | 0.00 | 0.00 |
| 218983_at   | C1RL      | complement con   | 0.19  | -2.41 | 0.00 | 0.00 |
| 221211_s_at | C21orf7   | chromosome 21    | 0.28  | -1.81 | 0.00 | 0.00 |
| 220681_at   | C22orf26  | chromosome 22    | 3.85  | 1.95  | 0.00 | 0.00 |
| 219617_at   | C2orf34   | chromosome 2 c   | 0.26  | -1.93 | 0.00 | 0.00 |
| 220943_s_at | C2orf56   | chromosome 2 c   | 0.28  | -1.82 | 0.00 | 0.00 |
| 215046_at   | C2orf67   | chromosome 2 c   | 0.20  | -2.34 | 0.00 | 0.00 |
| 65472_at    | C2orf68   | chromosome 2 c   | 0.29  | -1.80 | 0.00 | 0.00 |
| 218179_s_at | C4orf41   | chromosome 4 c   | 0.33  | -1.61 | 0.00 | 0.00 |
| 218513_at   | C4orf43   | chromosome 4 c   | 0.16  | -2.68 | 0.00 | 0.00 |
| 205500_at   | C5        | complement con   | 0.20  | -2.36 | 0.00 | 0.00 |
| 48030_i_at  | C5orf4    | chromosome 5 c   | 10.72 | 3.42  | 0.00 | 0.00 |
| 218674_at   | C5orf44   | chromosome 5 c   | 0.21  | -2.22 | 0.00 | 0.00 |
| 204238_s_at | C6orf108  | chromosome 6 c   | 3.03  | 1.60  | 0.00 | 0.00 |
| 221100_at   | C6orf15   | chromosome 6 c   | 3.81  | 1.93  | 0.00 | 0.00 |
| 218195_at   | C6orf211  | chromosome 6 c   | 0.14  | -2.80 | 0.00 | 0.00 |
| 220755_s_at | C6orf48   | chromosome 6 c   | 3.28  | 1.71  | 0.00 | 0.00 |
| 206497_at   | C7orf44   | chromosome 7 c   | 0.29  | -1.81 | 0.00 | 0.00 |
| 210109_at   | C7orf54   | chromosome 7 c   | 0.33  | -1.60 | 0.00 | 0.00 |
| 221596_s_at | C7orf64   | chromosome 7 c   | 0.21  | -2.24 | 0.00 | 0.00 |
| 221629_x_at | C8orf30A  | chromosome 8 c   | 4.03  | 2.01  | 0.00 | 0.00 |
| 218500_at   | C8orf55   | chromosome 8 c   | 3.47  | 1.80  | 0.00 | 0.00 |
| 210735_s_at | CA12      | carbonic anhydr  | 4.80  | 2.26  | 0.00 | 0.00 |
| 204865_at   | CA3       | carbonic anhydr  | 0.25  | -2.01 | 0.00 | 0.00 |
| 207504_at   | CA7       | carbonic anhydr  | 3.49  | 1.80  | 0.00 | 0.00 |
| 211592_s_at | CACNA1C   | calcium channel  | 0.25  | -1.98 | 0.00 | 0.00 |
| 211802_x_at | CACNA1G   | calcium channel  | 3.64  | 1.87  | 0.00 | 0.00 |
| 207693_at   | CACNB4    | calcium channel  | 3.37  | 1.75  | 0.00 | 0.00 |
| 62987_r_at  | CACNG4    | calcium channel  | 23.72 | 4.57  | 0.00 | 0.00 |
| 200757_s_at | CALU      | calumenin        | 3.51  | 1.81  | 0.00 | 0.00 |
| 34846_at    | CAMK2B    | calcium/calmodu  | 4.18  | 2.06  | 0.00 | 0.00 |
| 220162_s_at | CARD9     | caspase recruitr | 3.12  | 1.64  | 0.00 | 0.00 |

|             |          |                    |      |       |      |      |
|-------------|----------|--------------------|------|-------|------|------|
| 61297_at    | CASKIN2  | CASK interacti     | 0.26 | -1.94 | 0.00 | 0.00 |
| 222201_s_at | CASP8AP2 | caspase 8 assoc    | 0.22 | -2.16 | 0.00 | 0.00 |
| 215573_at   | CAT      | catalase           | 0.32 | -1.64 | 0.00 | 0.00 |
| 208204_s_at | CAV3     | caveolin 3         | 3.30 | 1.72  | 0.00 | 0.00 |
| 206788_s_at | CBFB     | core-binding fact  | 3.13 | 1.64  | 0.00 | 0.00 |
| 213626_at   | CBR4     | carbonyl reducta   | 0.16 | -2.68 | 0.00 | 0.00 |
| 219611_s_at | CCDC21   | coiled-coil doma   | 3.58 | 1.84  | 0.00 | 0.00 |
| 219644_at   | CCDC41   | coiled-coil doma   | 0.20 | -2.32 | 0.00 | 0.00 |
| 219387_at   | CCDC88A  | coiled-coil doma   | 0.32 | -1.63 | 0.00 | 0.01 |
| 218545_at   | CCDC91   | coiled-coil doma   | 0.29 | -1.81 | 0.00 | 0.00 |
| 209689_at   | CCDC93   | coiled-coil doma   | 0.31 | -1.69 | 0.00 | 0.00 |
| 207861_at   | CCL22    | chemokine (C-C     | 4.07 | 2.02  | 0.00 | 0.00 |
| 207955_at   | CCL27    | chemokine (C-C     | 0.22 | -2.20 | 0.00 | 0.00 |
| 204645_at   | CCNT2    | cyclin T2          | 0.33 | -1.62 | 0.00 | 0.00 |
| 222156_x_at | CCPG1    | cell cycle progre  | 0.27 | -1.91 | 0.00 | 0.00 |
| 221156_x_at | CCPG1    | cell cycle progre  | 0.21 | -2.27 | 0.00 | 0.00 |
| 206983_at   | CCR6     | chemokine (C-C     | 0.32 | -1.63 | 0.00 | 0.00 |
| 208653_s_at | CD164    | CD164 molecule     | 5.51 | 2.46  | 0.00 | 0.00 |
| 209772_s_at | CD24     | CD24 molecule      | 4.43 | 2.15  | 0.00 | 0.00 |
| 206150_at   | CD27     | CD27 molecule      | 0.28 | -1.82 | 0.00 | 0.00 |
| 203799_at   | CD302    | CD302 molecule     | 0.31 | -1.69 | 0.00 | 0.00 |
| 206488_s_at | CD36     | CD36 molecule (    | 9.27 | 3.21  | 0.00 | 0.00 |
| 209555_s_at | CD36     | CD36 molecule (    | 9.07 | 3.18  | 0.00 | 0.00 |
| 35150_at    | CD40     | CD40 molecule,     | 8.11 | 3.02  | 0.00 | 0.00 |
| 222292_at   | CD40     | CD40 molecule,     | 0.22 | -2.19 | 0.00 | 0.00 |
| 222061_at   | CD58     | CD58 molecule      | 0.20 | -2.31 | 0.00 | 0.00 |
| 204440_at   | CD83     | CD83 molecule      | 3.05 | 1.61  | 0.01 | 0.01 |
| 205288_at   | CDC14A   | CDC14 cell divis   | 0.23 | -2.14 | 0.00 | 0.00 |
| 210742_at   | CDC14A   | CDC14 cell divis   | 0.16 | -2.62 | 0.00 | 0.00 |
| 211347_at   | CDC14B   | CDC14 cell divis   | 0.28 | -1.82 | 0.00 | 0.00 |
| 201853_s_at | CDC25B   | cell division cycl | 5.19 | 2.37  | 0.00 | 0.00 |
| 217881_s_at | CDC27    | cell division cycl | 0.33 | -1.60 | 0.00 | 0.00 |
| 203377_s_at | CDC40    | cell division cycl | 0.32 | -1.66 | 0.00 | 0.00 |
| 209057_x_at | CDC5L    | CDC5 cell divisic  | 4.37 | 2.13  | 0.00 | 0.00 |
| 203256_at   | CDH3     | cadherin 3, type   | 6.55 | 2.71  | 0.00 | 0.00 |
| 204247_s_at | CDK5     | cyclin-dependen    | 3.71 | 1.89  | 0.00 | 0.00 |
| 202284_s_at | CDKN1A   | cyclin-dependen    | 3.22 | 1.69  | 0.00 | 0.00 |
| 207039_at   | CDKN2A   | cyclin-dependen    | 3.37 | 1.75  | 0.00 | 0.00 |
| 218929_at   | CDKN2AIP | CDKN2A interac     | 0.24 | -2.09 | 0.00 | 0.00 |
| 213230_at   | CDR2L    | cerebellar degen   | 4.83 | 2.27  | 0.00 | 0.00 |
| 206430_at   | CDX1     | caudal type hom    | 4.46 | 2.16  | 0.00 | 0.00 |
| 219591_at   | CEND1    | cell cycle exit an | 4.06 | 2.02  | 0.00 | 0.00 |
| 204739_at   | CENPC1   | centromere prot    | 0.24 | -2.08 | 0.00 | 0.00 |
| 214804_at   | CENPI    | centromere prot    | 0.29 | -1.79 | 0.00 | 0.00 |
| 218741_at   | CENPM    | centromere prot    | 3.23 | 1.69  | 0.00 | 0.00 |
| 219294_at   | CENPQ    | centromere prot    | 0.18 | -2.48 | 0.00 | 0.00 |
| 218148_at   | CENPT    | centromere prot    | 4.19 | 2.07  | 0.00 | 0.00 |
| 206003_at   | CEP135   | centrosomal proi   | 0.28 | -1.86 | 0.00 | 0.00 |

|             |         |                    |       |       |      |      |
|-------------|---------|--------------------|-------|-------|------|------|
| 215170_s_at | CEP152  | centrosomal prol   | 0.25  | -2.00 | 0.00 | 0.00 |
| 221683_s_at | CEP290  | centrosomal prol   | 0.11  | -3.14 | 0.00 | 0.00 |
| 222151_s_at | CEP63   | centrosomal prol   | 0.13  | -2.95 | 0.00 | 0.00 |
| 220335_x_at | CES3    | carboxylesterase   | 11.32 | 3.50  | 0.00 | 0.00 |
| 206380_s_at | CFP     | complement fact    | 0.21  | -2.24 | 0.00 | 0.00 |
| 215318_at   | CG012   | hypothetical gen   | 0.31  | -1.71 | 0.00 | 0.00 |
| 206932_at   | CH25H   | cholesterol 25-hy  | 4.73  | 2.24  | 0.00 | 0.00 |
| 201182_s_at | CHD4    | chromodomain h     | 0.30  | -1.73 | 0.00 | 0.00 |
| 220586_at   | CHD9    | chromodomain h     | 0.33  | -1.61 | 0.00 | 0.00 |
| 210416_s_at | CHEK2   | CHK2 checkpoin     | 3.83  | 1.94  | 0.00 | 0.00 |
| 213060_s_at | CHI3L2  | chitinase 3-like 2 | 6.11  | 2.61  | 0.00 | 0.00 |
| 218178_s_at | CHMP1B  | chromatin modifi   | 5.92  | 2.57  | 0.00 | 0.00 |
| 211248_s_at | CHRD    | chordin            | 0.16  | -2.63 | 0.00 | 0.00 |
| 210221_at   | CHRNA3  | cholinergic recep  | 5.14  | 2.36  | 0.00 | 0.00 |
| 209834_at   | CHST3   | carbohydrate (cf   | 5.45  | 2.45  | 0.00 | 0.00 |
| 205007_s_at | CIB2    | calcium and inte   | 3.87  | 1.95  | 0.00 | 0.00 |
| 205101_at   | CIITA   | class II, major hi | 0.31  | -1.69 | 0.00 | 0.00 |
| 209571_at   | CIR1    | corepressor inter  | 0.21  | -2.26 | 0.00 | 0.00 |
| 221223_x_at | CISH    | cytokine inducibl  | 3.11  | 1.64  | 0.00 | 0.00 |
| 204170_s_at | CKS2    | CDC28 protein k    | 3.03  | 1.60  | 0.01 | 0.03 |
| 212308_at   | CLASP2  | cytoplasmic linke  | 0.26  | -1.93 | 0.00 | 0.00 |
| 206164_at   | CLCA2   | chloride channel   | 3.58  | 1.84  | 0.00 | 0.00 |
| 220026_at   | CLCA4   | chloride channel   | 0.24  | -2.08 | 0.00 | 0.00 |
| 207855_s_at | CLCC1   | chloride channel   | 0.30  | -1.72 | 0.00 | 0.00 |
| 214769_at   | CLCN4   | chloride channel   | 0.32  | -1.65 | 0.00 | 0.00 |
| 204482_at   | CLDN5   | claudin 5          | 0.23  | -2.15 | 0.00 | 0.00 |
| 214598_at   | CLDN8   | claudin 8          | 0.06  | -4.13 | 0.00 | 0.00 |
| 210716_s_at | CLIP1   | CAP-GLY domai      | 0.31  | -1.70 | 0.00 | 0.00 |
| 201640_x_at | CLPTM1  | cleft lip and pala | 4.46  | 2.16  | 0.00 | 0.00 |
| 222043_at   | CLU     | clusterin          | 0.10  | -3.31 | 0.00 | 0.00 |
| 204577_s_at | CLUAP1  | clusterin associa  | 0.33  | -1.60 | 0.00 | 0.00 |
| 210571_s_at | CMAH    | cytidine monoph    | 0.31  | -1.71 | 0.00 | 0.00 |
| 205518_s_at | CMAH    | cytidine monoph    | 0.04  | -4.51 | 0.00 | 0.00 |
| 218111_s_at | CMAS    | cytidine monoph    | 0.23  | -2.14 | 0.00 | 0.00 |
| 206417_at   | CNGA1   | cyclic nucleotide  | 0.23  | -2.14 | 0.00 | 0.00 |
| 209874_x_at | CNNM2   | cyclin M2          | 4.76  | 2.25  | 0.00 | 0.00 |
| 210867_at   | CNOT4   | CCR4-NOT tran:     | 0.20  | -2.29 | 0.00 | 0.00 |
| 202163_s_at | CNOT8   | CCR4-NOT tran:     | 0.32  | -1.67 | 0.00 | 0.00 |
| 220323_at   | CNTD2   | cyclin N-terminal  | 4.34  | 2.12  | 0.00 | 0.00 |
| 206970_at   | CNTN2   | contactin 2 (axor  | 3.19  | 1.68  | 0.00 | 0.00 |
| 205229_s_at | COCH    | coagulation fact   | 0.18  | -2.45 | 0.00 | 0.00 |
| 211809_x_at | COL13A1 | collagen, type XI  | 0.25  | -2.00 | 0.00 | 0.00 |
| 208096_s_at | COL21A1 | collagen, type XI  | 0.23  | -2.10 | 0.00 | 0.00 |
| 222073_at   | COL4A3  | collagen, type IV  | 0.30  | -1.74 | 0.00 | 0.00 |
| 221729_at   | COL5A2  | collagen, type V,  | 0.27  | -1.88 | 0.01 | 0.01 |
| 221730_at   | COL5A2  | collagen, type V,  | 0.24  | -2.04 | 0.00 | 0.00 |
| 52255_s_at  | COL5A3  | collagen, type V,  | 0.30  | -1.75 | 0.00 | 0.00 |
| 213290_at   | COL6A2  | collagen, type VI  | 0.25  | -2.01 | 0.00 | 0.00 |



|             |         |                     |       |       |      |      |
|-------------|---------|---------------------|-------|-------|------|------|
| 221019_s_at | COLEC12 | collectin sub-farr  | 0.33  | -1.61 | 0.00 | 0.00 |
| 206441_s_at | COMMD4  | COMM domain c       | 3.15  | 1.66  | 0.00 | 0.00 |
| 216204_at   | COMT    | catechol-O-meth     | 3.38  | 1.76  | 0.00 | 0.00 |
| 217749_at   | COPG    | coatomer proteir    | 0.33  | -1.61 | 0.00 | 0.00 |
| 219561_at   | COPZ2   | coatomer proteir    | 3.03  | 1.60  | 0.00 | 0.00 |
| 203858_s_at | COX10   | COX10 homolog       | 3.10  | 1.63  | 0.00 | 0.00 |
| 211727_s_at | COX11   | COX11 homolog       | 0.27  | -1.88 | 0.00 | 0.00 |
| 221550_at   | COX15   | COX15 homolog       | 0.17  | -2.54 | 0.00 | 0.00 |
| 217249_x_at | COX7A2  | cytochrome c ox     | 3.47  | 1.79  | 0.00 | 0.00 |
| 202118_s_at | CPNE3   | copine III          | 0.33  | -1.61 | 0.00 | 0.00 |
| 202575_at   | CRABP2  | cellular retinoic ε | 3.02  | 1.60  | 0.01 | 0.02 |
| 209833_at   | CRADD   | CASP2 and RIPI      | 3.52  | 1.81  | 0.00 | 0.00 |
| 214508_x_at | CREM    | cAMP responsiv      | 3.04  | 1.60  | 0.00 | 0.00 |
| 202551_s_at | CRIM1   | cysteine rich trar  | 0.24  | -2.04 | 0.00 | 0.00 |
| 205081_at   | CRIP1   | cysteine-rich pro   | 0.10  | -3.26 | 0.00 | 0.00 |
| 207802_at   | CRISP3  | cysteine-rich sec   | 3.04  | 1.60  | 0.01 | 0.02 |
| 209674_at   | CRY1    | cryptochrome 1 i    | 0.18  | -2.44 | 0.00 | 0.00 |
| 206778_at   | CRYBB2  | crystallin, beta B  | 3.12  | 1.64  | 0.00 | 0.00 |
| 215930_s_at | CTAGE5  | CTAGE family, n     | 0.23  | -2.11 | 0.00 | 0.00 |
| 201533_at   | CTNNB1  | catenin (cadheri    | 0.27  | -1.91 | 0.00 | 0.00 |
| 200839_s_at | CTSB    | cathepsin B         | 3.09  | 1.63  | 0.00 | 0.00 |
| 202901_x_at | CTSS    | cathepsin S         | 0.19  | -2.39 | 0.00 | 0.00 |
| 212562_s_at | CTSZ    | cathepsin Z         | 3.54  | 1.83  | 0.00 | 0.00 |
| 202158_s_at | CUGBP2  | CUG triplet repe    | 0.31  | -1.67 | 0.00 | 0.00 |
| 203078_at   | CUL2    | cullin 2            | 0.24  | -2.08 | 0.00 | 0.00 |
| 210257_x_at | CUL4B   | cullin 4B           | 0.30  | -1.73 | 0.00 | 0.00 |
| 215997_s_at | CUL4B   | cullin 4B           | 0.20  | -2.30 | 0.00 | 0.00 |
| 203533_s_at | CUL5    | cullin 5            | 0.23  | -2.10 | 0.00 | 0.00 |
| 218787_x_at | CWF19L1 | CWF19-like 1, α     | 3.66  | 1.87  | 0.00 | 0.00 |
| 823_at      | CX3CL1  | chemokine (C-X:     | 4.69  | 2.23  | 0.00 | 0.00 |
| 205898_at   | CX3CR1  | chemokine (C-X:     | 0.33  | -1.61 | 0.01 | 0.02 |
| 217200_x_at | CYB561  | cytochrome b-56     | 3.09  | 1.63  | 0.00 | 0.00 |
| 202435_s_at | CYP1B1  | cytochrome P45      | 0.31  | -1.71 | 0.01 | 0.01 |
| 219825_at   | CYP26B1 | cytochrome P45      | 0.18  | -2.51 | 0.00 | 0.00 |
| 208327_at   | CYP2A13 | cytochrome P45      | 3.38  | 1.76  | 0.00 | 0.00 |
| 220432_s_at | CYP39A1 | cytochrome P45      | 0.21  | -2.23 | 0.00 | 0.00 |
| 210096_at   | CYP4B1  | cytochrome P45      | 0.29  | -1.80 | 0.01 | 0.02 |
| 210452_x_at | CYP4F2  | cytochrome P45      | 6.39  | 2.68  | 0.00 | 0.00 |
| 209606_at   | CYTIP   | cytohesin 1 inter   | 0.30  | -1.76 | 0.00 | 0.00 |
| 216060_s_at | DAAM1   | dishevelled asso    | 0.31  | -1.67 | 0.00 | 0.00 |
| 201624_at   | DARS    | aspartyl-tRNA sy    | 0.31  | -1.71 | 0.00 | 0.00 |
| 202806_at   | DBN1    | drebrin 1           | 4.86  | 2.28  | 0.00 | 0.00 |
| 209804_at   | DCLRE1A | DNA cross-link r    | 3.06  | 1.62  | 0.00 | 0.00 |
| 209231_s_at | DCTN5   | dynactin 5 (p25)    | 3.20  | 1.68  | 0.00 | 0.00 |
| 204909_at   | DDX6    | DEAD (Asp-Glu-      | 0.24  | -2.04 | 0.00 | 0.00 |
| 207356_at   | DEFB4   | defensin, beta 4    | 12.65 | 3.66  | 0.00 | 0.00 |
| 219763_at   | DENND1A | DENN/MADD dc        | 3.12  | 1.64  | 0.00 | 0.00 |
| 214787_at   | DENND4A | DENN/MADD dc        | 0.29  | -1.77 | 0.00 | 0.00 |

|             |              |                    |       |       |      |      |
|-------------|--------------|--------------------|-------|-------|------|------|
| 221887_s_at | DFNB31       | deafness, autos    | 3.24  | 1.69  | 0.00 | 0.00 |
| 217285_at   | DGCR14       | DiGeorge syndr     | 3.51  | 1.81  | 0.00 | 0.00 |
| 201791_s_at | DHCR7        | 7-dehydrocholes    | 4.64  | 2.22  | 0.00 | 0.00 |
| 201790_s_at | DHCR7        | 7-dehydrocholes    | 3.71  | 1.89  | 0.00 | 0.00 |
| 214017_s_at | DHX34        | DEAH (Asp-Glu-     | 3.15  | 1.65  | 0.00 | 0.00 |
| 212107_s_at | DHX9         | DEAH (Asp-Glu-     | 0.25  | -1.99 | 0.00 | 0.00 |
| 220572_at   | DKFZp547G183 | hypothetical LOC   | 0.29  | -1.80 | 0.00 | 0.00 |
| 202571_s_at | DLGAP4       | discs, large (Dro  | 4.05  | 2.02  | 0.00 | 0.00 |
| 220262_s_at | DLK2         | delta-like 2 hom   | 3.05  | 1.61  | 0.00 | 0.00 |
| 203881_s_at | DMD          | dystrophin         | 0.29  | -1.81 | 0.00 | 0.00 |
| 203791_at   | DMXL1        | Dmx-like 1         | 0.33  | -1.61 | 0.00 | 0.00 |
| 214229_at   | DNAH17       | dynein, axonem     | 3.39  | 1.76  | 0.00 | 0.00 |
| 215266_at   | DNAH3        | dynein, axonem     | 3.37  | 1.75  | 0.00 | 0.00 |
| 220395_at   | DNAJA4       | DnaJ (Hsp40) hc    | 3.48  | 1.80  | 0.00 | 0.00 |
| 202843_at   | DNAJB9       | DnaJ (Hsp40) hc    | 0.30  | -1.75 | 0.00 | 0.00 |
| 221781_s_at | DNAJC10      | DnaJ (Hsp40) hc    | 0.27  | -1.89 | 0.00 | 0.00 |
| 221782_at   | DNAJC10      | DnaJ (Hsp40) hc    | 0.24  | -2.05 | 0.00 | 0.00 |
| 212911_at   | DNAJC16      | DnaJ (Hsp40) hc    | 0.24  | -2.05 | 0.00 | 0.00 |
| 207192_at   | DNASE1L2     | deoxyribonuclea    | 3.15  | 1.66  | 0.00 | 0.00 |
| 202253_s_at | DNM2         | dynamain 2         | 4.95  | 2.31  | 0.00 | 0.00 |
| 205003_at   | DOCK4        | dedicator of cyto  | 0.23  | -2.15 | 0.00 | 0.00 |
| 40612_at    | DOPEY1       | dopey family me    | 0.28  | -1.83 | 0.00 | 0.00 |
| 213267_at   | DOPEY1       | dopey family me    | 0.15  | -2.77 | 0.00 | 0.00 |
| 222360_at   | DPH5         | DPH5 homolog (     | 0.26  | -1.94 | 0.00 | 0.00 |
| 201431_s_at | DPYSL3       | dihydropyrimidin   | 0.23  | -2.11 | 0.00 | 0.00 |
| 214301_s_at | DPYSL4       | dihydropyrimidin   | 3.13  | 1.65  | 0.00 | 0.00 |
| 207648_at   | DRP2         | dystrophin relate  | 4.23  | 2.08  | 0.00 | 0.00 |
| 204751_x_at | DSC2         | desmocollin 2      | 6.01  | 2.59  | 0.00 | 0.00 |
| 216646_at   | DSCC1        | defective in siste | 3.04  | 1.60  | 0.00 | 0.00 |
| 205595_at   | DSG3         | desmoglein 3 (pr   | 7.64  | 2.93  | 0.00 | 0.00 |
| 221681_s_at | DSPP         | dentin sialophos   | 0.24  | -2.05 | 0.00 | 0.00 |
| 214253_s_at | DTNB         | dystrobrevin, bel  | 5.39  | 2.43  | 0.00 | 0.00 |
| 205762_s_at | DUS4L        | dihydrouridine s   | 0.30  | -1.73 | 0.00 | 0.00 |
| 204794_at   | DUSP2        | dual specificity p | 4.45  | 2.15  | 0.00 | 0.00 |
| 209457_at   | DUSP5        | dual specificity p | 3.28  | 1.72  | 0.00 | 0.00 |
| 220774_at   | DYM          | dymeclin           | 0.22  | -2.22 | 0.00 | 0.00 |
| 203763_at   | DYNC2L11     | dynein, cytoplas   | 0.31  | -1.69 | 0.00 | 0.00 |
| 203762_s_at | DYNC2L11     | dynein, cytoplas   | 0.29  | -1.81 | 0.00 | 0.00 |
| 202971_s_at | DYRK2        | dual-specificity t | 0.16  | -2.66 | 0.00 | 0.00 |
| 2028_s_at   | E2F1         | E2F transcription  | 3.08  | 1.62  | 0.00 | 0.00 |
| 38707_r_at  | E2F4         | E2F transcription  | 15.49 | 3.95  | 0.00 | 0.00 |
| 213789_at   | EBP          | emopamil bindin    | 3.14  | 1.65  | 0.00 | 0.00 |
| 206101_at   | ECM2         | extracellular mat  | 0.17  | -2.55 | 0.00 | 0.00 |
| 211129_x_at | EDA          | ectodysplasin A    | 0.31  | -1.67 | 0.00 | 0.00 |
| 206758_at   | EDN2         | endothelin 2       | 3.58  | 1.84  | 0.00 | 0.00 |
| 204840_s_at | EEA1         | early endosome     | 0.17  | -2.59 | 0.00 | 0.00 |
| 201843_s_at | EFEMP1       | EGF-containing     | 0.26  | -1.92 | 0.00 | 0.01 |
| 205031_at   | EFNB3        | ephrin-B3          | 3.26  | 1.71  | 0.00 | 0.00 |

|             |         |                     |      |       |      |      |
|-------------|---------|---------------------|------|-------|------|------|
| 206254_at   | EGF     | epidermal growtl    | 0.24 | -2.06 | 0.00 | 0.00 |
| 201693_s_at | EGR1    | early growth resj   | 3.46 | 1.79  | 0.00 | 0.00 |
| 218935_at   | EHD3    | EH-domain conti     | 3.76 | 1.91  | 0.00 | 0.00 |
| 205222_at   | EHHADH  | enoyl-Coenzyme      | 0.27 | -1.91 | 0.00 | 0.00 |
| 211698_at   | EID1    | EP300 interactin    | 0.21 | -2.23 | 0.00 | 0.00 |
| 205321_at   | EIF2S3  | eukaryotic transl   | 0.27 | -1.90 | 0.00 | 0.00 |
| 210361_s_at | ELF2    | E74-like factor 2   | 0.25 | -2.03 | 0.00 | 0.00 |
| 210827_s_at | ELF3    | E74-like factor 3   | 5.28 | 2.40  | 0.00 | 0.00 |
| 203490_at   | ELF4    | E74-like factor 4   | 3.68 | 1.88  | 0.00 | 0.00 |
| 220625_s_at | ELF5    | E74-like factor 5   | 3.11 | 1.64  | 0.01 | 0.01 |
| 204095_s_at | ELL     | elongation factor   | 4.02 | 2.01  | 0.00 | 0.00 |
| 214446_at   | ELL2    | elongation factor   | 3.13 | 1.65  | 0.00 | 0.00 |
| 204797_s_at | EML1    | echinoderm micr     | 0.21 | -2.24 | 0.00 | 0.00 |
| 204796_at   | EML1    | echinoderm micr     | 0.16 | -2.65 | 0.00 | 0.00 |
| 204397_at   | EML2    | echinoderm micr     | 3.96 | 1.98  | 0.00 | 0.00 |
| 221950_at   | EMX2    | empty spiracles l   | 0.18 | -2.45 | 0.00 | 0.00 |
| 220559_at   | EN1     | engrailed homec     | 0.18 | -2.48 | 0.00 | 0.00 |
| 201719_s_at | EPB41L2 | erythrocyte memr    | 0.27 | -1.92 | 0.00 | 0.00 |
| 212681_at   | EPB41L3 | erythrocyte memr    | 0.24 | -2.06 | 0.00 | 0.00 |
| 201839_s_at | EPCAM   | epithelial cell adl | 0.18 | -2.50 | 0.00 | 0.00 |
| 203499_at   | EPHA2   | EPH receptor A2     | 4.06 | 2.02  | 0.00 | 0.00 |
| 209589_s_at | EPHB2   | EPH receptor B2     | 4.87 | 2.28  | 0.00 | 0.00 |
| 209588_at   | EPHB2   | EPH receptor B2     | 4.84 | 2.28  | 0.00 | 0.00 |
| 396_f_at    | EPOR    | erythropoietin re   | 6.43 | 2.69  | 0.00 | 0.00 |
| 215054_at   | EPOR    | erythropoietin re   | 0.31 | -1.70 | 0.00 | 0.00 |
| 221056_x_at | EPS15L1 | epidermal growtl    | 3.13 | 1.65  | 0.00 | 0.00 |
| 202609_at   | EPS8    | epidermal growtl    | 0.31 | -1.69 | 0.00 | 0.00 |
| 218778_x_at | EPS8L1  | EPS8-like 1         | 3.35 | 1.75  | 0.00 | 0.00 |
| 214012_at   | ERAP1   | endoplasmic reti    | 0.09 | -3.43 | 0.00 | 0.00 |
| 215095_at   | ESD     | esterase D/formy    | 0.26 | -1.92 | 0.00 | 0.00 |
| 211627_x_at | ESR1    | estrogen receptc    | 0.23 | -2.10 | 0.00 | 0.00 |
| 1487_at     | ESRRA   | estrogen-related    | 3.04 | 1.61  | 0.00 | 0.00 |
| 204034_at   | ETHE1   | ethylmalonic enc    | 5.08 | 2.35  | 0.00 | 0.00 |
| 210887_s_at | EVC     | Ellis van Creveld   | 4.41 | 2.14  | 0.00 | 0.00 |
| 210012_s_at | EWSR1   | Ewing sarcoma l     | 0.22 | -2.17 | 0.00 | 0.00 |
| 91684_g_at  | EXOSC4  | exosome compo       | 3.68 | 1.88  | 0.00 | 0.00 |
| 213929_at   | EXPH5   | exophilin 5         | 0.23 | -2.11 | 0.00 | 0.00 |
| 214985_at   | EXT1    | exostoses (multi    | 0.22 | -2.20 | 0.00 | 0.00 |
| 209692_at   | EYA2    | eyes absent hon     | 3.63 | 1.86  | 0.00 | 0.00 |
| 211310_at   | EZH1    | enhancer of zesi    | 0.26 | -1.95 | 0.00 | 0.00 |
| 203989_x_at | F2R     | coagulation factc   | 0.23 | -2.11 | 0.00 | 0.00 |
| 204363_at   | F3      | coagulation factc   | 0.33 | -1.61 | 0.00 | 0.00 |
| 205756_s_at | F8      | coagulation factc   | 3.30 | 1.72  | 0.00 | 0.00 |
| 210445_at   | FABP6   | fatty acid binding  | 3.20 | 1.68  | 0.00 | 0.00 |
| 205029_s_at | FABP7   | fatty acid binding  | 0.13 | -2.96 | 0.00 | 0.00 |
| 205030_at   | FABP7   | fatty acid binding  | 0.10 | -3.31 | 0.00 | 0.00 |
| 202218_s_at | FADS2   | fatty acid desatu   | 3.56 | 1.83  | 0.00 | 0.00 |
| 221602_s_at | FAIM3   | Fas apoptotic inf   | 3.81 | 1.93  | 0.00 | 0.00 |

|             |          |                   |      |       |      |      |
|-------------|----------|-------------------|------|-------|------|------|
| 212981_s_at | FAM115A  | family with sequ  | 0.30 | -1.75 | 0.00 | 0.00 |
| 52975_at    | FAM125B  | family with sequ  | 3.41 | 1.77  | 0.00 | 0.00 |
| 218532_s_at | FAM134B  | family with sequ  | 0.25 | -1.98 | 0.00 | 0.00 |
| 219203_at   | FAM158A  | family with sequ  | 3.07 | 1.62  | 0.00 | 0.00 |
| 218337_at   | FAM160B2 | family with sequ  | 4.56 | 2.19  | 0.00 | 0.00 |
| 212936_at   | FAM172A  | family with sequ  | 0.21 | -2.22 | 0.00 | 0.00 |
| 51158_at    | FAM174B  | family with sequ  | 0.18 | -2.48 | 0.00 | 0.00 |
| 220150_s_at | FAM184A  | family with sequ  | 0.29 | -1.80 | 0.00 | 0.00 |
| 213900_at   | FAM189A2 | family with sequ  | 0.19 | -2.40 | 0.00 | 0.00 |
| 202915_s_at | FAM20B   | family with sequ  | 0.28 | -1.83 | 0.00 | 0.00 |
| 201889_at   | FAM3C    | family with sequ  | 0.27 | -1.87 | 0.00 | 0.00 |
| 216682_s_at | FAM48A   | family with sequ  | 0.17 | -2.55 | 0.00 | 0.00 |
| 45749_at    | FAM65A   | family with sequ  | 3.01 | 1.59  | 0.00 | 0.00 |
| 215719_x_at | FAS      | Fas (TNF recept   | 0.23 | -2.13 | 0.00 | 0.00 |
| 210975_x_at | FASTK    | Fas-activated se  | 3.75 | 1.91  | 0.00 | 0.00 |
| 220896_at   | FBXL18   | F-box and leucin  | 3.64 | 1.86  | 0.00 | 0.00 |
| 219784_at   | FBXO31   | F-box protein 31  | 3.03 | 1.60  | 0.00 | 0.00 |
| 215567_at   | FCF1     | FCF1 small subu   | 0.25 | -1.99 | 0.00 | 0.00 |
| 211396_at   | FCGR2C   | Fc fragment of Iç | 4.13 | 2.05  | 0.00 | 0.00 |
| 222164_at   | FGFR1    | fibroblast growth | 0.14 | -2.86 | 0.00 | 0.00 |
| 210299_s_at | FHL1     | four and a half L | 0.26 | -1.94 | 0.00 | 0.00 |
| 201540_at   | FHL1     | four and a half L | 0.07 | -3.86 | 0.00 | 0.00 |
| 205283_at   | FKTN     | fukutin           | 0.32 | -1.66 | 0.00 | 0.00 |
| 205511_at   | FLJ10038 | hypothetical prot | 0.19 | -2.38 | 0.00 | 0.00 |
| 220828_s_at | FLJ11292 | hypothetical prot | 0.30 | -1.76 | 0.00 | 0.00 |
| 219871_at   | FLJ13197 | hypothetical FLJ  | 0.24 | -2.07 | 0.00 | 0.00 |
| 208613_s_at | FLNB     | filamin B, beta   | 3.09 | 1.63  | 0.00 | 0.00 |
| 210316_at   | FLT4     | fms-related tyros | 0.27 | -1.89 | 0.00 | 0.00 |
| 211726_s_at | FMO2     | flavin containing | 5.26 | 2.40  | 0.00 | 0.00 |
| 215300_s_at | FMO5     | flavin containing | 0.26 | -1.96 | 0.00 | 0.00 |
| 203689_s_at | FMR1     | fragile X mental  | 0.28 | -1.83 | 0.00 | 0.00 |
| 202768_at   | FOSB     | FBJ murine oste   | 5.34 | 2.42  | 0.00 | 0.01 |
| 204420_at   | FOSL1    | FOS-like antigen  | 5.02 | 2.33  | 0.00 | 0.00 |
| 213260_at   | FOXC1    | forkhead box C1   | 4.76 | 2.25  | 0.00 | 0.00 |
| 206912_at   | FOX E1   | forkhead box E1   | 5.41 | 2.44  | 0.00 | 0.00 |
| 205021_s_at | FOXN3    | forkhead box N3   | 5.04 | 2.33  | 0.00 | 0.00 |
| 205140_at   | FPGT     | fucose-1-phosph   | 0.32 | -1.64 | 0.00 | 0.00 |
| 205119_s_at | FPR1     | formyl peptide re | 3.65 | 1.87  | 0.00 | 0.00 |
| 220819_at   | FRMD1    | FERM domain c     | 3.18 | 1.67  | 0.00 | 0.00 |
| 212546_s_at | FRYL     | FRY-like          | 0.18 | -2.49 | 0.00 | 0.00 |
| 220604_x_at | FTCD     | formiminotransfe  | 3.05 | 1.61  | 0.00 | 0.00 |
| 212847_at   | FUBP1    | far upstream ele  | 0.25 | -1.99 | 0.00 | 0.00 |
| 214093_s_at | FUBP1    | far upstream ele  | 0.17 | -2.54 | 0.00 | 0.00 |
| 204299_at   | FUSIP1   | FUS interacting p | 0.33 | -1.61 | 0.00 | 0.00 |
| 210608_s_at | FUT2     | fucosyltransfera  | 6.13 | 2.62  | 0.00 | 0.00 |
| 214088_s_at | FUT3     | fucosyltransfera  | 3.05 | 1.61  | 0.00 | 0.00 |
| 210399_x_at | FUT6     | fucosyltransfera  | 5.21 | 2.38  | 0.00 | 0.00 |
| 211465_x_at | FUT6     | fucosyltransfera  | 4.30 | 2.10  | 0.00 | 0.00 |

|             |         |                                 |       |       |      |      |
|-------------|---------|---------------------------------|-------|-------|------|------|
| 203988_s_at | FUT8    | fucosyltransferase              | 0.24  | -2.05 | 0.00 | 0.00 |
| 201636_at   | FXR1    | fragile X mental retardation    | 0.15  | -2.76 | 0.00 | 0.00 |
| 218084_x_at | FXYP5   | FXYP domain containing          | 4.22  | 2.08  | 0.00 | 0.00 |
| 212486_s_at | FYN     | FYN oncogene protein            | 0.29  | -1.77 | 0.00 | 0.00 |
| 209416_s_at | FZR1    | fizzy/cell division control     | 3.06  | 1.62  | 0.00 | 0.00 |
| 214240_at   | GAL     | galanin prepropeptide           | 4.42  | 2.14  | 0.00 | 0.00 |
| 207357_s_at | GALNT10 | UDP-N-acetylglucosamine         | 0.33  | -1.60 | 0.00 | 0.00 |
| 218885_s_at | GALNT12 | UDP-N-acetylglucosamine         | 0.28  | -1.85 | 0.00 | 0.00 |
| 219271_at   | GALNT14 | UDP-N-acetylglucosamine         | 9.48  | 3.25  | 0.00 | 0.00 |
| 219956_at   | GALNT6  | UDP-N-acetylglucosamine         | 4.03  | 2.01  | 0.00 | 0.00 |
| 33579_i_at  | GALR3   | galanin receptor                | 4.96  | 2.31  | 0.00 | 0.00 |
| 210446_at   | GATA1   | GATA binding protein            | 3.06  | 1.61  | 0.00 | 0.00 |
| 203178_at   | GATM    | glycine amidinotransferase      | 0.22  | -2.20 | 0.00 | 0.00 |
| 218912_at   | GCC1    | GRIP and coiled-coil            | 3.21  | 1.68  | 0.00 | 0.00 |
| 221136_at   | GDF2    | growth differentiation factor   | 3.15  | 1.66  | 0.00 | 0.00 |
| 219539_at   | GEMIN6  | gem (nuclear organelle)         | 4.37  | 2.13  | 0.00 | 0.00 |
| 221028_s_at | GFOD2   | glucose-fructose oxidoreductase | 3.76  | 1.91  | 0.00 | 0.00 |
| 218114_at   | GGA1    | golgi associated, gamma         | 3.02  | 1.59  | 0.00 | 0.00 |
| 64064_at    | GIMAP5  | GTPase, IMAP family             | 3.14  | 1.65  | 0.00 | 0.00 |
| 218030_at   | GIT1    | G protein-coupled receptor      | 3.05  | 1.61  | 0.00 | 0.00 |
| 213713_s_at | GLB1L2  | galactosidase, beta             | 4.37  | 2.13  | 0.00 | 0.00 |
| 213552_at   | GLCE    | glucuronic acid oxidase         | 0.28  | -1.84 | 0.00 | 0.00 |
| 218458_at   | GMCL1   | germ cell-less homeobox         | 0.33  | -1.59 | 0.00 | 0.00 |
| 214071_at   | GNAL    | guanine nucleotide-binding      | 0.24  | -2.08 | 0.00 | 0.00 |
| 206355_at   | GNAL    | guanine nucleotide-binding      | 0.21  | -2.26 | 0.00 | 0.00 |
| 208519_x_at | GNRH2   | gonadotropin-releasing          | 3.73  | 1.90  | 0.00 | 0.00 |
| 208797_s_at | GOLGA8A | golgi autoantigen               | 0.20  | -2.32 | 0.00 | 0.00 |
| 204322_at   | GOLIM4  | golgi integral membrane         | 3.22  | 1.69  | 0.00 | 0.00 |
| 204324_s_at | GOLIM4  | golgi integral membrane         | 0.22  | -2.19 | 0.00 | 0.00 |
| 218692_at   | GOLSYN  | Golgi-localized protein         | 0.14  | -2.89 | 0.00 | 0.00 |
| 219846_at   | GON4L   | gon-4-like (C. elegans)         | 0.29  | -1.77 | 0.00 | 0.00 |
| 213144_at   | GOSR2   | golgi SNAP receptor             | 3.20  | 1.68  | 0.00 | 0.00 |
| 209769_s_at | GP1BB   | glycoprotein Ib (platelet)      | 3.46  | 1.79  | 0.00 | 0.00 |
| 206883_x_at | GP9     | glycoprotein IX (platelet)      | 3.60  | 1.85  | 0.00 | 0.00 |
| 210007_s_at | GPD2    | glycerol-3-phosphate            | 0.31  | -1.70 | 0.00 | 0.00 |
| 215554_at   | GPLD1   | glycosylphosphatidylinositol    | 0.17  | -2.55 | 0.00 | 0.00 |
| 213094_at   | GPR126  | G protein-coupled receptor      | 0.26  | -1.94 | 0.00 | 0.00 |
| 221958_s_at | GPR177  | G protein-coupled receptor      | 0.25  | -2.03 | 0.00 | 0.00 |
| 204793_at   | GPRASP1 | G protein-coupled receptor      | 0.24  | -2.07 | 0.00 | 0.00 |
| 203108_at   | GPRC5A  | G protein-coupled receptor      | 3.21  | 1.68  | 0.01 | 0.02 |
| 202831_at   | GPX2    | glutathione peroxidase          | 16.12 | 4.01  | 0.00 | 0.00 |
| 213170_at   | GPX7    | glutathione peroxidase          | 4.22  | 2.08  | 0.00 | 0.00 |
| 218706_s_at | GRAMD3  | GRAM domain containing          | 0.26  | -1.95 | 0.00 | 0.00 |
| 210761_s_at | GRB7    | growth factor receptor          | 4.21  | 2.07  | 0.00 | 0.00 |
| 213845_at   | GRIK2   | glutamate receptor              | 0.27  | -1.89 | 0.00 | 0.00 |
| 216481_at   | GRIP2   | glutamate receptor              | 5.69  | 2.51  | 0.00 | 0.00 |
| 204395_s_at | GRK5    | G protein-coupled receptor      | 3.04  | 1.61  | 0.00 | 0.00 |
| 202849_x_at | GRK6    | G protein-coupled receptor      | 3.12  | 1.64  | 0.00 | 0.00 |

|             |             |                   |       |       |      |      |
|-------------|-------------|-------------------|-------|-------|------|------|
| 207929_at   | GRPR        | gastrin-releas    | 3.28  | 1.71  | 0.00 | 0.00 |
| 209595_at   | GTF2F2      | general transcrip | 0.28  | -1.81 | 0.00 | 0.00 |
| 205276_s_at | GTPBP1      | GTP binding pro   | 5.04  | 2.33  | 0.00 | 0.00 |
| 204235_s_at | GULP1       | GULP, engulfme    | 0.20  | -2.30 | 0.00 | 0.00 |
| 221892_at   | H6PD        | hexose-6-phospl   | 0.26  | -1.93 | 0.00 | 0.00 |
| 201035_s_at | HADH        | hydroxyacyl-Coe   | 3.43  | 1.78  | 0.00 | 0.00 |
| 207316_at   | HAS1        | hyaluronan syntf  | 4.55  | 2.19  | 0.00 | 0.00 |
| 213054_at   | HAUS5       | HAUS augmin-lil   | 0.28  | -1.85 | 0.00 | 0.00 |
| 218602_s_at | HAUS6       | HAUS augmin-lil   | 0.19  | -2.43 | 0.00 | 0.00 |
| 217232_x_at | HBB         | hemoglobin, bet   | 4.48  | 2.16  | 0.00 | 0.00 |
| 38037_at    | HBEGF       | heparin-binding l | 15.01 | 3.91  | 0.00 | 0.00 |
| 203821_at   | HBEGF       | heparin-binding l | 9.23  | 3.21  | 0.00 | 0.00 |
| 209315_at   | HBS1L       | HBS1-like (S. ce  | 0.20  | -2.31 | 0.00 | 0.00 |
| 209314_s_at | HBS1L       | HBS1-like (S. ce  | 0.20  | -2.34 | 0.00 | 0.00 |
| 215349_at   | hCG_1730474 | hypothetical prot | 5.47  | 2.45  | 0.00 | 0.00 |
| 220354_at   | hCG_1774568 | similar to hCG17  | 3.37  | 1.75  | 0.00 | 0.00 |
| 214893_x_at | HCN2        | hyperpolarizator  | 3.34  | 1.74  | 0.00 | 0.00 |
| 216224_s_at | HDAC6       | histone deacetyl  | 4.04  | 2.01  | 0.00 | 0.00 |
| 220085_at   | HELLS       | helicase, lymphc  | 0.32  | -1.64 | 0.00 | 0.01 |
| 219352_at   | HERC6       | hect domain and   | 3.73  | 1.90  | 0.00 | 0.00 |
| 214308_s_at | HGD         | homogentisate 1   | 4.30  | 2.11  | 0.00 | 0.00 |
| 219687_at   | HHAT        | hedgehog acyltr   | 4.93  | 2.30  | 0.00 | 0.00 |
| 221162_at   | HHLA1       | HERV-H LTR-as     | 3.73  | 1.90  | 0.00 | 0.00 |
| 216911_s_at | HIC2        | hypermethylated   | 3.19  | 1.67  | 0.00 | 0.00 |
| 212293_at   | HIPK1       | homeodomain in    | 0.32  | -1.66 | 0.00 | 0.00 |
| 214542_x_at | HIST1H2AI   | histone cluster 1 | 7.25  | 2.86  | 0.00 | 0.00 |
| 208583_x_at | HIST1H2AJ   | histone cluster 1 | 9.76  | 3.29  | 0.00 | 0.00 |
| 221582_at   | HIST3H2A    | histone cluster 3 | 3.31  | 1.73  | 0.00 | 0.00 |
| 204512_at   | HIVEP1      | human immunoc     | 0.19  | -2.42 | 0.00 | 0.00 |
| 220042_x_at | HIVEP3      | human immunoc     | 5.03  | 2.33  | 0.00 | 0.00 |
| 218152_at   | HMG20A      | high-mobility gro | 0.32  | -1.64 | 0.00 | 0.00 |
| 207353_s_at | HMX1        | H6 family homec   | 3.21  | 1.68  | 0.00 | 0.00 |
| 216889_s_at | HNF4A       | hepatocyte nucl   | 3.11  | 1.64  | 0.00 | 0.00 |
| 221919_at   | HNRNPA1     | heterogeneous r   | 0.15  | -2.75 | 0.00 | 0.00 |
| 213472_at   | HNRNPH1     | heterogeneous r   | 0.26  | -1.95 | 0.00 | 0.00 |
| 202072_at   | HNRNPL      | heterogeneous r   | 5.00  | 2.32  | 0.00 | 0.00 |
| 66053_at    | HNRNPUL2    | heterogeneous r   | 0.29  | -1.77 | 0.00 | 0.00 |
| 222222_s_at | HOMER3      | homer homolog     | 3.00  | 1.59  | 0.00 | 0.00 |
| 218780_at   | HOOK2       | hook homolog 2    | 3.32  | 1.73  | 0.00 | 0.00 |
| 213150_at   | HOXA10      | homeobox A10      | 0.24  | -2.04 | 0.00 | 0.00 |
| 209905_at   | HOXA9       | homeobox A9       | 0.08  | -3.67 | 0.00 | 0.00 |
| 214651_s_at | HOXA9       | homeobox A9       | 0.06  | -3.96 | 0.00 | 0.00 |
| 208224_at   | HOXB1       | homeobox B1       | 3.84  | 1.94  | 0.00 | 0.00 |
| 205366_s_at | HOXB6       | homeobox B6       | 0.32  | -1.66 | 0.00 | 0.00 |
| 218959_at   | HOXC10      | homeobox C10      | 0.28  | -1.86 | 0.00 | 0.00 |
| 206858_s_at | HOXC6       | homeobox C6       | 0.13  | -2.92 | 0.00 | 0.00 |
| 221350_at   | HOXC8       | homeobox C8       | 0.16  | -2.61 | 0.00 | 0.00 |
| 214604_at   | HOXD11      | homeobox D11      | 3.83  | 1.94  | 0.00 | 0.00 |

|             |         |                     |       |       |      |      |
|-------------|---------|---------------------|-------|-------|------|------|
| 220633_s_at | HP1BP3  | heterochromatin     | 3.63  | 1.86  | 0.00 | 0.00 |
| 206726_at   | HPGDS   | hematopoietic pr    | 0.33  | -1.61 | 0.02 | 0.04 |
| 219403_s_at | HPSE    | heparanase          | 4.88  | 2.29  | 0.00 | 0.00 |
| 39763_at    | HPX     | hemopexin           | 3.38  | 1.76  | 0.00 | 0.00 |
| 220163_s_at | HR      | hairless homolog    | 3.29  | 1.72  | 0.00 | 0.00 |
| 221663_x_at | HRH3    | histamine recept    | 4.25  | 2.09  | 0.00 | 0.00 |
| 205829_at   | HSD17B1 | hydroxysteroid (    | 3.14  | 1.65  | 0.00 | 0.00 |
| 204818_at   | HSD17B2 | hydroxysteroid (    | 4.28  | 2.10  | 0.00 | 0.00 |
| 209657_s_at | HSF2    | heat shock trans    | 0.23  | -2.11 | 0.00 | 0.00 |
| 213418_at   | HSPA6   | heat shock 70kD     | 3.13  | 1.65  | 0.00 | 0.00 |
| 214163_at   | HSPB11  | heat shock prote    | 0.32  | -1.64 | 0.00 | 0.00 |
| 207578_s_at | HTR4    | 5-hydroxytryptan    | 3.26  | 1.71  | 0.00 | 0.00 |
| 220249_at   | HYAL4   | hyaluronoglucos     | 3.80  | 1.93  | 0.00 | 0.00 |
| 215513_at   | HYMAI   | hydatidiform mol    | 0.21  | -2.23 | 0.00 | 0.00 |
| 204949_at   | ICAM3   | intercellular adhe  | 4.42  | 2.14  | 0.00 | 0.00 |
| 204569_at   | ICK     | intestinal cell (M  | 0.25  | -1.99 | 0.00 | 0.00 |
| 208937_s_at | ID1     | inhibitor of DNA    | 5.26  | 2.39  | 0.00 | 0.00 |
| 209292_at   | ID4     | inhibitor of DNA    | 0.22  | -2.20 | 0.00 | 0.01 |
| 202438_x_at | IDS     | iduronate 2-sulfa   | 0.32  | -1.66 | 0.00 | 0.00 |
| 202411_at   | IFI27   | interferon, alpha   | 11.84 | 3.57  | 0.00 | 0.00 |
| 214453_s_at | IFI44   | interferon-induce   | 6.02  | 2.59  | 0.00 | 0.00 |
| 204415_at   | IFI6    | interferon, alpha   | 4.25  | 2.09  | 0.00 | 0.00 |
| 203153_at   | IFIT1   | interferon-induce   | 3.51  | 1.81  | 0.01 | 0.03 |
| 214022_s_at | IFITM1  | interferon induce   | 6.75  | 2.76  | 0.00 | 0.00 |
| 201601_x_at | IFITM1  | interferon induce   | 5.58  | 2.48  | 0.00 | 0.00 |
| 201315_x_at | IFITM2  | interferon induce   | 3.41  | 1.77  | 0.00 | 0.00 |
| 212203_x_at | IFITM3  | interferon induce   | 3.41  | 1.77  | 0.00 | 0.00 |
| 219174_at   | IFT74   | intraflagellar tran | 0.32  | -1.67 | 0.00 | 0.00 |
| 61732_r_at  | IFT74   | intraflagellar tran | 0.21  | -2.28 | 0.00 | 0.00 |
| 203628_at   | IGF1R   | insulin-like growt  | 0.31  | -1.71 | 0.00 | 0.00 |
| 203424_s_at | IGFBP5  | insulin-like growt  | 0.16  | -2.65 | 0.00 | 0.00 |
| 211959_at   | IGFBP5  | insulin-like growt  | 0.16  | -2.69 | 0.00 | 0.01 |
| 31861_at    | IGHMBP2 | immunoglobulin      | 10.30 | 3.37  | 0.00 | 0.00 |
| 202490_at   | IKBKAP  | inhibitor of kappa  | 0.24  | -2.08 | 0.00 | 0.00 |
| 36004_at    | IKBKG   | inhibitor of kappa  | 6.09  | 2.61  | 0.00 | 0.00 |
| 209929_s_at | IKBKG   | inhibitor of kappa  | 3.98  | 1.99  | 0.00 | 0.00 |
| 64440_at    | IL17RC  | interleukin 17 rec  | 6.54  | 2.71  | 0.00 | 0.00 |
| 219323_s_at | IL18BP  | interleukin 18 bir  | 4.35  | 2.12  | 0.00 | 0.00 |
| 39402_at    | IL1B    | interleukin 1, bet  | 3.43  | 1.78  | 0.00 | 0.00 |
| 205067_at   | IL1B    | interleukin 1, bet  | 3.25  | 1.70  | 0.00 | 0.00 |
| 220322_at   | IL1F9   | interleukin 1 fam   | 3.49  | 1.80  | 0.00 | 0.01 |
| 212659_s_at | IL1RN   | interleukin 1 rec   | 4.29  | 2.10  | 0.00 | 0.00 |
| 222062_at   | IL27RA  | interleukin 27 rec  | 5.31  | 2.41  | 0.00 | 0.00 |
| 203233_at   | IL4R    | interleukin 4 rec   | 3.47  | 1.79  | 0.00 | 0.00 |
| 206693_at   | IL7     | interleukin 7       | 0.07  | -3.75 | 0.00 | 0.00 |
| 204465_s_at | INA     | intermexin neuroi   | 5.96  | 2.58  | 0.00 | 0.00 |
| 214705_at   | INADL   | InaD-like (Droso    | 0.13  | -2.91 | 0.00 | 0.00 |
| 205258_at   | INHBB   | inhibin, beta B     | 3.59  | 1.85  | 0.00 | 0.00 |

|             |          |                     |      |       |      |      |
|-------------|----------|---------------------|------|-------|------|------|
| 202781_s_at | INPP5K   | inositol polyphos   | 3.40 | 1.77  | 0.00 | 0.00 |
| 218783_at   | INTS7    | integrator compl    | 0.30 | -1.72 | 0.00 | 0.00 |
| 210114_at   | INVS     | inversin            | 0.28 | -1.86 | 0.00 | 0.00 |
| 221974_at   | IPW      | imprinted in Prac   | 0.29 | -1.77 | 0.00 | 0.00 |
| 203907_s_at | IQSEC1   | IQ motif and Sec    | 3.93 | 1.97  | 0.00 | 0.00 |
| 214819_at   | IQSEC2   | IQ motif and Sec    | 3.30 | 1.72  | 0.00 | 0.00 |
| 203882_at   | IRF9     | interferon regula   | 3.15 | 1.66  | 0.00 | 0.00 |
| 206104_at   | ISL1     | ISL LIM homeob      | 0.33 | -1.59 | 0.00 | 0.00 |
| 218893_at   | ISOC2    | isochorismatase     | 4.71 | 2.24  | 0.00 | 0.00 |
| 205032_at   | ITGA2    | integrin, alpha 2   | 3.22 | 1.69  | 0.00 | 0.00 |
| 205786_s_at | ITGAM    | integrin, alpha M   | 7.09 | 2.83  | 0.00 | 0.00 |
| 202661_at   | ITPR2    | inositol 1,4,5-trip | 0.30 | -1.73 | 0.00 | 0.00 |
| 202660_at   | ITPR2    | inositol 1,4,5-trip | 0.18 | -2.49 | 0.00 | 0.00 |
| 202662_s_at | ITPR2    | inositol 1,4,5-trip | 0.14 | -2.88 | 0.00 | 0.00 |
| 209298_s_at | ITSN1    | intersectin 1 (SH   | 0.26 | -1.94 | 0.00 | 0.00 |
| 216495_x_at | IVD      | isovaleryl Coenz    | 5.62 | 2.49  | 0.00 | 0.00 |
| 214599_at   | IVL      | involucrin          | 4.95 | 2.31  | 0.01 | 0.03 |
| 205841_at   | JAK2     | Janus kinase 2      | 0.23 | -2.10 | 0.00 | 0.00 |
| 218560_s_at | JMJD4    | jumonji domain c    | 3.45 | 1.79  | 0.00 | 0.00 |
| 201466_s_at | JUN      | jun oncogene        | 3.79 | 1.92  | 0.00 | 0.00 |
| 201464_x_at | JUN      | jun oncogene        | 3.09 | 1.63  | 0.00 | 0.00 |
| 201473_at   | JUNB     | jun B proto-onco    | 3.27 | 1.71  | 0.00 | 0.00 |
| 203751_x_at | JUND     | jun D proto-onco    | 3.31 | 1.73  | 0.00 | 0.00 |
| 219106_s_at | KBTD10   | kelch repeat and    | 0.29 | -1.81 | 0.00 | 0.00 |
| 210078_s_at | KCNAB1   | potassium voltaç    | 0.22 | -2.16 | 0.00 | 0.00 |
| 206231_at   | KCNN1    | potassium intern    | 4.77 | 2.26  | 0.00 | 0.00 |
| 211217_s_at | KCNQ1    | potassium voltaç    | 3.13 | 1.65  | 0.00 | 0.00 |
| 207366_at   | KCNS1    | potassium voltaç    | 6.10 | 2.61  | 0.00 | 0.00 |
| 212192_at   | KCTD12   | potassium chanr     | 0.25 | -1.98 | 0.00 | 0.00 |
| 212188_at   | KCTD12   | potassium chanr     | 0.23 | -2.15 | 0.00 | 0.00 |
| 45653_at    | KCTD13   | potassium chanr     | 0.32 | -1.64 | 0.00 | 0.00 |
| 217894_at   | KCTD3    | potassium chanr     | 0.17 | -2.58 | 0.00 | 0.00 |
| 209984_at   | KDM4C    | lysine (K)-specifi  | 0.32 | -1.66 | 0.00 | 0.00 |
| 202383_at   | KDM5C    | lysine (K)-specifi  | 3.13 | 1.64  | 0.00 | 0.00 |
| 203991_s_at | KDM6A    | lysine (K)-specifi  | 0.20 | -2.36 | 0.00 | 0.00 |
| 41387_r_at  | KDM6B    | lysine (K)-specifi  | 4.41 | 2.14  | 0.00 | 0.00 |
| 41386_i_at  | KDM6B    | lysine (K)-specifi  | 3.35 | 1.74  | 0.00 | 0.00 |
| 201977_s_at | KIAA0141 | KIAA0141            | 0.31 | -1.69 | 0.00 | 0.00 |
| 212523_s_at | KIAA0146 | KIAA0146            | 0.27 | -1.89 | 0.00 | 0.00 |
| 213208_at   | KIAA0240 | KIAA0240            | 0.33 | -1.59 | 0.00 | 0.00 |
| 212427_at   | KIAA0368 | KIAA0368            | 0.26 | -1.96 | 0.00 | 0.00 |
| 214295_at   | KIAA0485 | hypothetical LOC    | 0.25 | -2.02 | 0.00 | 0.00 |
| 212943_at   | KIAA0528 | KIAA0528            | 0.28 | -1.85 | 0.00 | 0.00 |
| 204075_s_at | KIAA0562 | KIAA0562            | 0.12 | -3.10 | 0.00 | 0.00 |
| 215268_at   | KIAA0754 | KIAA0754            | 0.14 | -2.83 | 0.00 | 0.00 |
| 212633_at   | KIAA0776 | KIAA0776            | 0.23 | -2.15 | 0.00 | 0.00 |
| 213358_at   | KIAA0802 | KIAA0802            | 5.07 | 2.34  | 0.00 | 0.00 |
| 213424_at   | KIAA0895 | KIAA0895            | 0.06 | -4.08 | 0.00 | 0.00 |



|             |          |                    |        |       |      |      |
|-------------|----------|--------------------|--------|-------|------|------|
| 215936_s_at | KIAA1033 | KIAA1033           | 0.28   | -1.85 | 0.00 | 0.00 |
| 214098_at   | KIAA1107 | KIAA1107           | 0.27   | -1.87 | 0.00 | 0.00 |
| 212942_s_at | KIAA1199 | KIAA1199           | 3.48   | 1.80  | 0.00 | 0.00 |
| 215367_at   | KIAA1614 | KIAA1614           | 3.19   | 1.67  | 0.00 | 0.00 |
| 220171_x_at | KIAA1704 | KIAA1704           | 0.29   | -1.79 | 0.00 | 0.00 |
| 220777_at   | KIF13A   | kinesin family m   | 0.26   | -1.93 | 0.00 | 0.01 |
| 219570_at   | KIF16B   | kinesin family m   | 0.30   | -1.74 | 0.00 | 0.00 |
| 208128_x_at | KIF25    | kinesin family m   | 4.07   | 2.03  | 0.00 | 0.00 |
| 203130_s_at | KIF5C    | kinesin family m   | 0.32   | -1.65 | 0.00 | 0.00 |
| 209680_s_at | KIFC1    | kinesin family m   | 3.09   | 1.63  | 0.00 | 0.00 |
| 221302_at   | KLF15    | Kruppel-like fact  | 3.28   | 1.71  | 0.00 | 0.00 |
| 203543_s_at | KLF9     | Kruppel-like fact  | 0.14   | -2.84 | 0.00 | 0.00 |
| 204176_at   | KLHL20   | kelch-like 20 (Dr  | 0.26   | -1.94 | 0.00 | 0.00 |
| 213610_s_at | KLHL23   | kelch-like 23 (Dr  | 0.27   | -1.87 | 0.00 | 0.00 |
| 221986_s_at | KLHL24   | kelch-like 24 (Dr  | 0.23   | -2.10 | 0.01 | 0.01 |
| 220238_s_at | KLHL7    | kelch-like 7 (Dro  | 0.25   | -2.02 | 0.00 | 0.00 |
| 204733_at   | KLK6     | kallikrein-related | 7.72   | 2.95  | 0.00 | 0.00 |
| 206316_s_at | KNTC1    | kinetochore assoc  | 0.30   | -1.76 | 0.00 | 0.00 |
| 204010_s_at | KRAS     | v-Ki-ras2 Kirsten  | 0.16   | -2.69 | 0.00 | 0.00 |
| 216713_at   | KRIT1    | KRIT1, ankyrin r   | 0.31   | -1.71 | 0.00 | 0.00 |
| 34031_i_at  | KRIT1    | KRIT1, ankyrin r   | 0.20   | -2.33 | 0.00 | 0.00 |
| 203203_s_at | KRR1     | KRR1, small sub    | 0.23   | -2.10 | 0.00 | 0.00 |
| 209800_at   | KRT16    | keratin 16         | 17.49  | 4.13  | 0.00 | 0.00 |
| 212236_x_at | KRT17    | keratin 17         | 7.36   | 2.88  | 0.00 | 0.00 |
| 205157_s_at | KRT17    | keratin 17         | 5.33   | 2.41  | 0.02 | 0.03 |
| 209125_at   | KRT6A    | keratin 6A         | 149.21 | 7.22  | 0.00 | 0.00 |
| 213680_at   | KRT6B    | keratin 6B         | 112.36 | 6.81  | 0.00 | 0.00 |
| 209126_x_at | KRT6B    | keratin 6B         | 18.46  | 4.21  | 0.00 | 0.00 |
| 207065_at   | KRT75    | keratin 75         | 7.12   | 2.83  | 0.00 | 0.00 |
| 208188_at   | KRT9     | keratin 9          | 17.25  | 4.11  | 0.00 | 0.00 |
| 208532_x_at | KRTAP5-8 | keratin associate  | 6.46   | 2.69  | 0.00 | 0.00 |
| 216076_at   | L3MBTL   | l(3)mbt-like (Dro  | 3.04   | 1.60  | 0.00 | 0.00 |
| 210306_at   | L3MBTL   | l(3)mbt-like (Dro  | 0.19   | -2.39 | 0.00 | 0.00 |
| 218701_at   | LACTB2   | lactamase, beta    | 0.28   | -1.84 | 0.00 | 0.00 |
| 210089_s_at | LAMA4    | laminin, alpha 4   | 0.29   | -1.77 | 0.00 | 0.00 |
| 216622_at   | LAMB4    | laminin, beta 4    | 0.28   | -1.83 | 0.00 | 0.00 |
| 215516_at   | LAMB4    | laminin, beta 4    | 0.15   | -2.76 | 0.00 | 0.01 |
| 202019_s_at | LANCL1   | LanC lantibiotic s | 3.50   | 1.81  | 0.00 | 0.00 |
| 214155_s_at | LARP4    | La ribonucleoprc   | 0.28   | -1.83 | 0.00 | 0.00 |
| 208953_at   | LARP4B   | La ribonucleoprc   | 0.32   | -1.64 | 0.00 | 0.00 |
| 212442_s_at | LASS6    | LAG1 homolog, i    | 0.23   | -2.13 | 0.00 | 0.00 |
| 212446_s_at | LASS6    | LAG1 homolog, i    | 0.18   | -2.47 | 0.00 | 0.00 |
| 207734_at   | LAX1     | lymphocyte trans   | 0.24   | -2.06 | 0.00 | 0.00 |
| 212531_at   | LCN2     | lipocalin 2        | 8.09   | 3.02  | 0.00 | 0.00 |
| 201030_x_at | LDHB     | lactate dehydrog   | 3.03   | 1.60  | 0.01 | 0.01 |
| 202068_s_at | LDLR     | low density lipop  | 4.53   | 2.18  | 0.00 | 0.00 |
| 202067_s_at | LDLR     | low density lipop  | 3.94   | 1.98  | 0.00 | 0.00 |
| 200923_at   | LGALS3BP | lectin, galactosid | 4.20   | 2.07  | 0.00 | 0.00 |

|             |           |                    |      |       |      |      |
|-------------|-----------|--------------------|------|-------|------|------|
| 218326_s_at | LGR4      | leucine-rich repe  | 0.21 | -2.26 | 0.00 | 0.00 |
| 214471_x_at | LHB       | luteinizing hormc  | 3.67 | 1.88  | 0.00 | 0.00 |
| 208333_at   | LHX5      | LIM homeobox 5     | 3.13 | 1.65  | 0.00 | 0.00 |
| 205266_at   | LIF       | leukemia inhibitc  | 0.26 | -1.94 | 0.00 | 0.00 |
| 211336_x_at | LILRB1    | leukocyte immur    | 3.14 | 1.65  | 0.00 | 0.00 |
| 204356_at   | LIMK1     | LIM domain kina    | 3.37 | 1.75  | 0.00 | 0.00 |
| 206123_at   | LLGL1     | lethal giant larva | 4.18 | 2.07  | 0.00 | 0.00 |
| 218574_s_at | LMCD1     | LIM and cysteine   | 4.28 | 2.10  | 0.00 | 0.00 |
| 213703_at   | LOC150759 | hypothetical prot  | 0.19 | -2.43 | 0.00 | 0.00 |
| 215978_x_at | LOC152719 | hypothetical prot  | 6.04 | 2.60  | 0.00 | 0.00 |
| 220609_at   | LOC202181 | hypothetical prot  | 0.24 | -2.09 | 0.00 | 0.00 |
| 213510_x_at | LOC220594 | TL132 protein      | 0.27 | -1.90 | 0.00 | 0.00 |
| 217219_at   | LOC26102  | hypothetical LOC   | 3.97 | 1.99  | 0.00 | 0.00 |
| 216387_x_at | LOC399804 | similar to nucleo  | 0.32 | -1.66 | 0.00 | 0.00 |
| 217667_at   | LOC729799 | SEC14-like 1 psi   | 0.23 | -2.16 | 0.00 | 0.00 |
| 214712_at   | LOC730092 | RRN3 RNA poly      | 0.29 | -1.80 | 0.00 | 0.00 |
| 215202_at   | LOC91316  | glucuronidase, b   | 4.30 | 2.11  | 0.00 | 0.00 |
| 213502_x_at | LOC91316  | glucuronidase, b   | 0.31 | -1.71 | 0.01 | 0.02 |
| 204036_at   | LPAR1     | lysophosphatidic   | 0.33 | -1.60 | 0.00 | 0.00 |
| 201818_at   | LPCAT1    | lysophosphatidyl   | 3.21 | 1.68  | 0.00 | 0.00 |
| 90610_at    | LRCH4     | leucine-rich repe  | 4.23 | 2.08  | 0.00 | 0.00 |
| 220253_s_at | LRP12     | low density lipop  | 0.26 | -1.93 | 0.00 | 0.00 |
| 204381_at   | LRP3      | low density lipop  | 3.22 | 1.69  | 0.00 | 0.00 |
| 34697_at    | LRP6      | low density lipop  | 0.25 | -2.01 | 0.00 | 0.00 |
| 221740_x_at | LRRC37A2  | leucine rich repe  | 0.27 | -1.90 | 0.00 | 0.00 |
| 220220_at   | LRRC37A4  | leucine rich repe  | 0.26 | -1.93 | 0.00 | 0.00 |
| 218577_at   | LRRC40    | leucine rich repe  | 0.28 | -1.83 | 0.00 | 0.00 |
| 208140_s_at | LRRC48    | leucine rich repe  | 0.28 | -1.86 | 0.00 | 0.00 |
| 222231_s_at | LRRC59    | leucine rich repe  | 4.70 | 2.23  | 0.00 | 0.00 |
| 218907_s_at | LRRC61    | leucine rich repe  | 4.03 | 2.01  | 0.00 | 0.00 |
| 220174_at   | LRRC8E    | leucine rich repe  | 3.36 | 1.75  | 0.00 | 0.00 |
| 216164_at   | LRRN2     | leucine rich repe  | 3.21 | 1.68  | 0.00 | 0.00 |
| 212924_s_at | LSM4      | LSM4 homolog,      | 3.73 | 1.90  | 0.00 | 0.00 |
| 202018_s_at | LTF       | lactotransferrin   | 4.61 | 2.21  | 0.00 | 0.00 |
| 208835_s_at | LUC7L3    | LUC7-like 3 (S. c  | 0.33 | -1.59 | 0.00 | 0.00 |
| 207114_at   | LY6G6C    | lymphocyte antiç   | 3.03 | 1.60  | 0.00 | 0.00 |
| 204952_at   | LYPD3     | LY6/PLAUR don      | 3.91 | 1.97  | 0.01 | 0.02 |
| 221311_x_at | LYRM2     | LYR motif contai   | 0.33 | -1.62 | 0.00 | 0.00 |
| 213975_s_at | LYZ       | lysozyme (renal    | 3.33 | 1.74  | 0.01 | 0.03 |
| 221553_at   | MAGT1     | magnesium tran:    | 0.29 | -1.81 | 0.00 | 0.00 |
| 204777_s_at | MAL       | mal, T-cell differ | 6.38 | 2.67  | 0.00 | 0.00 |
| 221760_at   | MAN1A1    | mannosidase, al    | 0.21 | -2.22 | 0.00 | 0.00 |
| 217282_at   | MAN1A2    | mannosidase, al    | 0.16 | -2.68 | 0.00 | 0.00 |
| 219999_at   | MAN2A2    | mannosidase, al    | 0.20 | -2.34 | 0.00 | 0.00 |
| 204389_at   | MAOA      | monoamine oxid     | 0.32 | -1.65 | 0.00 | 0.00 |
| 216765_at   | MAP2K5    | mitogen-activate   | 0.29 | -1.78 | 0.00 | 0.00 |
| 206362_x_at | MAP3K10   | mitogen-activate   | 3.29 | 1.72  | 0.00 | 0.00 |
| 218311_at   | MAP4K3    | mitogen-activate   | 0.12 | -3.05 | 0.00 | 0.00 |

|             |          |                     |      |       |      |      |
|-------------|----------|---------------------|------|-------|------|------|
| 211081_s_at | MAP4K5   | mitogen-activate    | 0.17 | -2.55 | 0.00 | 0.00 |
| 211500_at   | MAPK11   | mitogen-activate    | 5.33 | 2.42  | 0.00 | 0.00 |
| 210570_x_at | MAPK9    | mitogen-activate    | 3.14 | 1.65  | 0.00 | 0.00 |
| 218411_s_at | MBIP     | MAP3K12 bindin      | 0.29 | -1.81 | 0.00 | 0.00 |
| 201151_s_at | MBNL1    | muscleblind-like    | 0.24 | -2.06 | 0.00 | 0.00 |
| 211037_s_at | MBOAT7   | membrane boun       | 3.74 | 1.90  | 0.00 | 0.00 |
| 207115_x_at | MBTD1    | mbt domain cont     | 0.24 | -2.07 | 0.00 | 0.00 |
| 213761_at   | MDM1     | Mdm1 nuclear pi     | 0.24 | -2.08 | 0.00 | 0.00 |
| 217542_at   | MDM2     | Mdm2 p53 bindin     | 0.32 | -1.63 | 0.00 | 0.00 |
| 218664_at   | MECR     | mitochondrial tra   | 4.35 | 2.12  | 0.00 | 0.00 |
| 203497_at   | MED1     | mediator comple     | 0.19 | -2.37 | 0.00 | 0.00 |
| 201986_at   | MED13    | mediator comple     | 0.32 | -1.63 | 0.00 | 0.00 |
| 212207_at   | MED13L   | mediator comple     | 0.24 | -2.06 | 0.00 | 0.00 |
| 216109_at   | MED13L   | mediator comple     | 0.22 | -2.16 | 0.00 | 0.00 |
| 207078_at   | MED6     | mediator comple     | 0.12 | -3.02 | 0.00 | 0.00 |
| 208328_s_at | MEF2A    | myocyte enhanc      | 0.32 | -1.66 | 0.00 | 0.00 |
| 212831_at   | MEGF9    | multiple EGF-like   | 0.20 | -2.33 | 0.00 | 0.00 |
| 213899_at   | METAP2   | methionyl amino     | 0.33 | -1.59 | 0.00 | 0.00 |
| 220797_at   | METT10D  | methyltransferas    | 0.24 | -2.03 | 0.00 | 0.00 |
| 211424_x_at | METTL7A  | methyltransferas    | 0.22 | -2.19 | 0.00 | 0.00 |
| 219858_s_at | MFSD6    | major facilitator s | 0.18 | -2.45 | 0.00 | 0.00 |
| 211386_at   | MGC12488 | hypothetical prot   | 0.24 | -2.06 | 0.00 | 0.00 |
| 203636_at   | MID1     | midline 1 (Opitz/   | 3.89 | 1.96  | 0.00 | 0.00 |
| 221863_at   | MIER2    | mesoderm induc      | 5.05 | 2.34  | 0.00 | 0.00 |
| 214625_s_at | MINK1    | misshapen-like k    | 4.69 | 2.23  | 0.00 | 0.00 |
| 216845_x_at | MLL2     | myeloid/lymphoi     | 4.35 | 2.12  | 0.00 | 0.00 |
| 216382_s_at | MLL2     | myeloid/lymphoi     | 3.82 | 1.93  | 0.00 | 0.00 |
| 214939_x_at | MLLT4    | myeloid/lymphoi     | 3.56 | 1.83  | 0.00 | 0.00 |
| 218211_s_at | MLPH     | melanophilin        | 3.25 | 1.70  | 0.00 | 0.00 |
| 203878_s_at | MMP11    | matrix metallope    | 3.05 | 1.61  | 0.00 | 0.00 |
| 202828_s_at | MMP14    | matrix metallope    | 3.08 | 1.62  | 0.00 | 0.00 |
| 203936_s_at | MMP9     | matrix metallope    | 3.42 | 1.78  | 0.02 | 0.03 |
| 218212_s_at | MOCS2    | molybdenum cof      | 0.33 | -1.62 | 0.00 | 0.00 |
| 219852_s_at | MORN1    | MORN repeat cc      | 8.32 | 3.06  | 0.00 | 0.00 |
| 201874_at   | MPZL1    | myelin protein ze   | 4.64 | 2.21  | 0.00 | 0.00 |
| 210594_x_at | MPZL1    | myelin protein ze   | 3.77 | 1.91  | 0.00 | 0.00 |
| 210224_at   | MR1      | major histocomp     | 0.31 | -1.70 | 0.00 | 0.00 |
| 215919_s_at | MRPS11   | mitochondrial rib   | 0.31 | -1.71 | 0.00 | 0.00 |
| 219666_at   | MS4A6A   | membrane-span       | 3.98 | 1.99  | 0.00 | 0.00 |
| 205887_x_at | MSH3     | mutS homolog 3      | 0.24 | -2.09 | 0.00 | 0.00 |
| 219281_at   | MSRA     | methionine sulfo    | 3.86 | 1.95  | 0.00 | 0.00 |
| 204956_at   | MTAP     | methylthioadeno     | 0.23 | -2.10 | 0.00 | 0.00 |
| 203347_s_at | MTF2     | metal response e    | 0.19 | -2.39 | 0.00 | 0.00 |
| 220346_at   | MTHFD2L  | methylenetetrah     | 0.29 | -1.80 | 0.00 | 0.00 |
| 36920_at    | MTM1     | myotubularin 1      | 0.28 | -1.85 | 0.00 | 0.00 |
| 205076_s_at | MTMR11   | myotubularin rel    | 3.90 | 1.96  | 0.00 | 0.00 |
| 203199_s_at | MTRR     | 5-methyltetrahyc    | 0.32 | -1.63 | 0.00 | 0.00 |
| 212093_s_at | MTUS1    | mitochondrial tur   | 0.28 | -1.86 | 0.00 | 0.00 |

|             |         |                    |       |       |      |      |
|-------------|---------|--------------------|-------|-------|------|------|
| 36907_at    | MVK     | mevalonate kina    | 5.09  | 2.35  | 0.00 | 0.00 |
| 202086_at   | MX1     | myxovirus (influe  | 14.56 | 3.86  | 0.00 | 0.00 |
| 204994_at   | MX2     | myxovirus (influe  | 3.48  | 1.80  | 0.00 | 0.00 |
| 201710_at   | MYBL2   | v-myb myeloblas    | 3.34  | 1.74  | 0.00 | 0.00 |
| 208040_s_at | MYBPC3  | myosin binding p   | 4.31  | 2.11  | 0.00 | 0.00 |
| 219946_x_at | MYH14   | myosin, heavy cl   | 10.91 | 3.45  | 0.00 | 0.00 |
| 206657_s_at | MYOD1   | myogenic differe   | 3.76  | 1.91  | 0.00 | 0.00 |
| 205826_at   | MYOM2   | myomesin (M-pr     | 0.26  | -1.94 | 0.00 | 0.00 |
| 219509_at   | MYOZ1   | myozenin 1         | 3.50  | 1.81  | 0.00 | 0.00 |
| 202259_s_at | N4BP2L2 | NEDD4 binding p    | 0.28  | -1.85 | 0.00 | 0.00 |
| 204860_s_at | NAIP    | NLR family, apo    | 0.17  | -2.58 | 0.00 | 0.00 |
| 220184_at   | NANOG   | Nanog homeobo      | 0.30  | -1.74 | 0.00 | 0.00 |
| 219368_at   | NAP1L2  | nucleosome ass     | 0.32  | -1.66 | 0.00 | 0.00 |
| 204749_at   | NAP1L3  | nucleosome ass     | 0.17  | -2.56 | 0.00 | 0.00 |
| 222369_at   | NAT11   | N-acetyltransfer   | 0.31  | -1.70 | 0.00 | 0.00 |
| 221207_s_at | NBEA    | neurobeachin       | 0.29  | -1.77 | 0.00 | 0.00 |
| 201621_at   | NBL1    | neuroblastoma, t   | 3.87  | 1.95  | 0.00 | 0.00 |
| 209556_at   | NCDN    | neurochondrin      | 6.26  | 2.65  | 0.00 | 0.00 |
| 209557_s_at | NCDN    | neurochondrin      | 5.85  | 2.55  | 0.00 | 0.00 |
| 205731_s_at | NCOA2   | nuclear receptor   | 0.21  | -2.23 | 0.00 | 0.00 |
| 217045_x_at | NCR2    | natural cytotoxic  | 4.14  | 2.05  | 0.00 | 0.00 |
| 217493_x_at | NCR2    | natural cytotoxic  | 3.59  | 1.85  | 0.00 | 0.00 |
| 218160_at   | NDUFA8  | NADH dehydrog      | 3.10  | 1.63  | 0.00 | 0.00 |
| 213116_at   | NEK3    | NIMA (never in r   | 0.26  | -1.95 | 0.00 | 0.00 |
| 204634_at   | NEK4    | NIMA (never in r   | 0.32  | -1.64 | 0.00 | 0.00 |
| 214738_s_at | NEK9    | NIMA (never in r   | 3.05  | 1.61  | 0.00 | 0.00 |
| 214125_s_at | NENF    | neuron derived r   | 3.43  | 1.78  | 0.00 | 0.00 |
| 218678_at   | NES     | nestin             | 3.40  | 1.77  | 0.00 | 0.00 |
| 204889_s_at | NEURL   | neuralized homo    | 5.60  | 2.48  | 0.00 | 0.00 |
| 213438_at   | NFASC   | neurofascin hom    | 0.25  | -2.03 | 0.00 | 0.00 |
| 210556_at   | NFATC3  | nuclear factor of  | 0.22  | -2.19 | 0.00 | 0.00 |
| 213033_s_at | NFIB    | nuclear factor I/E | 0.27  | -1.88 | 0.00 | 0.00 |
| 213032_at   | NFIB    | nuclear factor I/E | 0.16  | -2.65 | 0.00 | 0.00 |
| 211466_at   | NFIB    | nuclear factor I/E | 0.14  | -2.87 | 0.00 | 0.00 |
| 210268_at   | NFX1    | nuclear transcrip  | 0.21  | -2.24 | 0.00 | 0.00 |
| 204109_s_at | NFYA    | nuclear transcrip  | 4.16  | 2.06  | 0.00 | 0.00 |
| 215228_at   | NHLH2   | nescient helix lo  | 0.16  | -2.67 | 0.00 | 0.00 |
| 219353_at   | NHLRC2  | NHL repeat cont    | 0.15  | -2.73 | 0.00 | 0.00 |
| 207108_s_at | NIPBL   | Nipped-B homolo    | 0.25  | -2.01 | 0.00 | 0.00 |
| 205004_at   | NKRF    | NFKB repressin     | 0.33  | -1.60 | 0.00 | 0.00 |
| 215338_s_at | NKTR    | natural killer-tum | 0.24  | -2.03 | 0.00 | 0.00 |
| 206578_at   | NKX2-5  | NK2 transcrip      | 4.95  | 2.31  | 0.00 | 0.00 |
| 205895_s_at | NOLC1   | nucleolar and co   | 3.70  | 1.89  | 0.00 | 0.00 |
| 214011_s_at | NOP16   | NOP16 nucleola     | 3.81  | 1.93  | 0.00 | 0.00 |
| 201695_s_at | NP      | nucleoside phos    | 5.75  | 2.52  | 0.00 | 0.00 |
| 211584_s_at | NPAT    | nuclear protein, i | 0.32  | -1.65 | 0.00 | 0.00 |
| 219789_at   | NPR3    | natriuretic peptid | 0.26  | -1.96 | 0.00 | 0.01 |
| 205440_s_at | NPY1R   | neuropeptide Y r   | 0.13  | -2.95 | 0.00 | 0.00 |

|             |         |                   |      |       |      |      |
|-------------|---------|-------------------|------|-------|------|------|
| 201468_s_at | NQO1    | NAD(P)H dehyd     | 4.37 | 2.13  | 0.01 | 0.01 |
| 210519_s_at | NQO1    | NAD(P)H dehyd     | 4.05 | 2.02  | 0.01 | 0.01 |
| 206410_at   | NR0B2   | nuclear receptor  | 3.35 | 1.75  | 0.00 | 0.00 |
| 209119_x_at | NR2F2   | nuclear receptor  | 0.13 | -2.97 | 0.00 | 0.00 |
| 205259_at   | NR3C2   | nuclear receptor  | 0.21 | -2.23 | 0.00 | 0.00 |
| 202340_x_at | NR4A1   | nuclear receptor  | 5.87 | 2.55  | 0.00 | 0.00 |
| 211143_x_at | NR4A1   | nuclear receptor  | 5.82 | 2.54  | 0.00 | 0.00 |
| 210226_at   | NR4A1   | nuclear receptor  | 3.84 | 1.94  | 0.00 | 0.00 |
| 204621_s_at | NR4A2   | nuclear receptor  | 3.30 | 1.72  | 0.00 | 0.01 |
| 209959_at   | NR4A3   | nuclear receptor  | 6.87 | 2.78  | 0.00 | 0.00 |
| 202600_s_at | NRIP1   | nuclear receptor  | 0.25 | -2.03 | 0.00 | 0.00 |
| 210841_s_at | NRP2    | neuropilin 2      | 3.55 | 1.83  | 0.00 | 0.00 |
| 209279_s_at | NSDHL   | NAD(P) depend     | 3.88 | 1.96  | 0.00 | 0.00 |
| 219708_at   | NT5M    | 5',3'-nucleotidas | 3.03 | 1.60  | 0.00 | 0.00 |
| 203675_at   | NUCB2   | nucleobindin 2    | 0.23 | -2.13 | 0.00 | 0.00 |
| 214136_at   | NUDT13  | nudix (nucleosid  | 0.13 | -2.95 | 0.00 | 0.00 |
| 213461_at   | NUDT21  | nudix (nucleosid  | 0.23 | -2.15 | 0.00 | 0.00 |
| 220183_s_at | NUDT6   | nudix (nucleosid  | 0.30 | -1.74 | 0.00 | 0.00 |
| 205134_s_at | NUFIP1  | nuclear fragile X | 0.33 | -1.59 | 0.00 | 0.00 |
| 214250_at   | NUMA1   | nuclear mitotic a | 0.30 | -1.75 | 0.01 | 0.03 |
| 207545_s_at | NUMB    | numb homolog (    | 0.28 | -1.83 | 0.00 | 0.00 |
| 212709_at   | NUP160  | nucleoporin 160k  | 0.25 | -2.03 | 0.00 | 0.00 |
| 218294_s_at | NUP50   | nucleoporin 50k   | 0.25 | -1.98 | 0.00 | 0.00 |
| 202869_at   | OAS1    | 2',5'-oligoadenyl | 4.35 | 2.12  | 0.00 | 0.00 |
| 205552_s_at | OAS1    | 2',5'-oligoadenyl | 3.17 | 1.66  | 0.00 | 0.00 |
| 210797_s_at | OASL    | 2'-5'-oligoadenyl | 3.80 | 1.93  | 0.00 | 0.00 |
| 201364_s_at | OAZ2    | ornithine decarb  | 3.19 | 1.68  | 0.00 | 0.00 |
| 220848_x_at | OBP2A   | odorant binding p | 3.72 | 1.89  | 0.00 | 0.00 |
| 44617_at    | OGFOD2  | 2-oxoglutarate a  | 4.76 | 2.25  | 0.00 | 0.00 |
| 204853_at   | ORC2L   | origin recognitio | 0.30 | -1.73 | 0.00 | 0.00 |
| 211212_s_at | ORC5L   | origin recognitio | 0.28 | -1.84 | 0.00 | 0.00 |
| 219073_s_at | OSBPL10 | oxysterol binding | 0.28 | -1.83 | 0.00 | 0.00 |
| 209627_s_at | OSBPL3  | oxysterol binding | 0.27 | -1.89 | 0.00 | 0.00 |
| 212582_at   | OSBPL8  | oxysterol binding | 0.30 | -1.74 | 0.00 | 0.00 |
| 38710_at    | OTUB1   | OTU domain, ub    | 3.84 | 1.94  | 0.00 | 0.00 |
| 219369_s_at | OTUB2   | OTU domain, ub    | 3.53 | 1.82  | 0.00 | 0.00 |
| 206604_at   | OVOL1   | ovo-like 1(Droso  | 3.82 | 1.93  | 0.00 | 0.00 |
| 202780_at   | OXCT1   | 3-oxoacid CoA tr  | 0.33 | -1.61 | 0.00 | 0.00 |
| 218197_s_at | OXR1    | oxidation resista | 0.26 | -1.94 | 0.00 | 0.00 |
| 200654_at   | P4HB    | prolyl 4-hydroxyl | 3.03 | 1.60  | 0.00 | 0.00 |
| 220962_s_at | PADI1   | peptidyl arginine | 3.13 | 1.64  | 0.00 | 0.00 |
| 213754_s_at | PAIP1   | poly(A) binding p | 0.24 | -2.06 | 0.00 | 0.00 |
| 208876_s_at | PAK2    | p21 protein (Cdc  | 0.17 | -2.57 | 0.00 | 0.00 |
| 215374_at   | PAPOLA  | poly(A) polymera  | 0.30 | -1.73 | 0.00 | 0.00 |
| 205245_at   | PARD6A  | par-6 partitionin | 5.22 | 2.38  | 0.00 | 0.00 |
| 214237_x_at | PAWR    | PRKC, apoptosis   | 4.36 | 2.12  | 0.00 | 0.00 |
| 121_at      | PAX8    | paired box 8      | 6.84 | 2.77  | 0.00 | 0.00 |
| 219543_at   | PBLD    | phenazine biosy   | 0.32 | -1.63 | 0.00 | 0.00 |

|             |          |                   |       |       |      |      |
|-------------|----------|-------------------|-------|-------|------|------|
| 202876_s_at | PBX2     | pre-B-cell leu    | 0.24  | -2.06 | 0.00 | 0.00 |
| 212259_s_at | PBXIP1   | pre-B-cell leu    | 3.36  | 1.75  | 0.00 | 0.00 |
| 220186_s_at | PCDH24   | protocadherin 24  | 4.33  | 2.11  | 0.00 | 0.00 |
| 210368_at   | PCDHGA8  | protocadherin ga  | 0.30  | -1.73 | 0.00 | 0.00 |
| 203378_at   | PCF11    | PCF11, cleavag    | 0.20  | -2.33 | 0.00 | 0.00 |
| 219940_s_at | PCID2    | PCI domain cont   | 3.15  | 1.65  | 0.00 | 0.00 |
| 205560_at   | PCSK5    | proprotein conve  | 0.30  | -1.72 | 0.00 | 0.00 |
| 205559_s_at | PCSK5    | proprotein conve  | 0.18  | -2.51 | 0.00 | 0.00 |
| 209700_x_at | PDE4DIP  | phosphodiestera   | 0.21  | -2.27 | 0.00 | 0.00 |
| 221957_at   | PK3      | pyruvate dehydr   | 3.55  | 1.83  | 0.00 | 0.00 |
| 218690_at   | PDLIM4   | PDZ and LIM do    | 4.72  | 2.24  | 0.00 | 0.00 |
| 203242_s_at | PDLIM5   | PDZ and LIM do    | 0.22  | -2.21 | 0.00 | 0.00 |
| 213684_s_at | PDLIM5   | PDZ and LIM do    | 0.20  | -2.32 | 0.00 | 0.00 |
| 32029_at    | PDPK1    | 3-phosphoinositi  | 3.76  | 1.91  | 0.00 | 0.00 |
| 204742_s_at | PDS5B    | PDS5, regulator   | 0.28  | -1.85 | 0.00 | 0.00 |
| 215888_at   | PDS5B    | PDS5, regulator   | 0.26  | -1.92 | 0.00 | 0.00 |
| 219630_at   | PDZK1IP1 | PDZK1 interactir  | 6.80  | 2.77  | 0.00 | 0.00 |
| 209242_at   | PEG3     | paternally expres | 0.19  | -2.38 | 0.00 | 0.00 |
| 219132_at   | PELI2    | pellino homolog   | 0.13  | -2.95 | 0.00 | 0.00 |
| 204300_at   | PET112L  | PET112-like (ye   | 4.29  | 2.10  | 0.00 | 0.00 |
| 204873_at   | PEX1     | peroxisomal bioç  | 0.16  | -2.69 | 0.00 | 0.00 |
| 201706_s_at | PEX19    | peroxisomal bioç  | 7.11  | 2.83  | 0.00 | 0.00 |
| 203969_at   | PEX3     | peroxisomal bioç  | 0.14  | -2.79 | 0.00 | 0.00 |
| 206390_x_at | PF4      | platelet factor 4 | 3.29  | 1.72  | 0.00 | 0.00 |
| 207931_s_at | PFKFB2   | 6-phosphofructo   | 3.14  | 1.65  | 0.00 | 0.00 |
| 213469_at   | PGAP1    | post-GPI attachr  | 0.14  | -2.84 | 0.00 | 0.00 |
| 220576_at   | PGAP1    | post-GPI attachr  | 0.08  | -3.69 | 0.00 | 0.00 |
| 219225_at   | PGBD5    | piggyBac transp   | 7.12  | 2.83  | 0.00 | 0.00 |
| 201118_at   | PGD      | phosphoglucona    | 4.01  | 2.01  | 0.00 | 0.00 |
| 209652_s_at | PGF      | placental growth  | 3.71  | 1.89  | 0.00 | 0.00 |
| 218410_s_at | PGP      | phosphoglycolat   | 3.72  | 1.90  | 0.00 | 0.00 |
| 204049_s_at | PHACTR2  | phosphatase an    | 0.21  | -2.22 | 0.00 | 0.00 |
| 218338_at   | PHC1     | polyhomeotic ho   | 3.57  | 1.84  | 0.00 | 0.00 |
| 217951_s_at | PHF3     | PHD finger prote  | 0.20  | -2.33 | 0.00 | 0.00 |
| 215718_s_at | PHF3     | PHD finger prote  | 0.14  | -2.85 | 0.00 | 0.00 |
| 205450_at   | PHKA1    | phosphorylase k   | 4.88  | 2.29  | 0.00 | 0.00 |
| 216102_at   | PHLDB1   | pleckstrin homol  | 4.47  | 2.16  | 0.00 | 0.00 |
| 203691_at   | PI3      | peptidase inhibit | 34.53 | 5.11  | 0.00 | 0.00 |
| 41469_at    | PI3      | peptidase inhibit | 31.72 | 4.99  | 0.00 | 0.00 |
| 209346_s_at | PI4K2A   | phosphatidylinos  | 3.03  | 1.60  | 0.00 | 0.00 |
| 37433_at    | PIAS2    | protein inhibitor | 0.14  | -2.80 | 0.00 | 0.00 |
| 213239_at   | PIBF1    | progesterone im   | 0.18  | -2.50 | 0.00 | 0.00 |
| 215242_at   | PIGC     | phosphatidylinos  | 0.29  | -1.79 | 0.00 | 0.00 |
| 204369_at   | PIK3CA   | phosphoinositide  | 0.16  | -2.62 | 0.00 | 0.00 |
| 217620_s_at | PIK3CB   | phosphoinositide  | 0.13  | -3.00 | 0.00 | 0.00 |
| 212240_s_at | PIK3R1   | phosphoinositide  | 0.22  | -2.20 | 0.00 | 0.00 |
| 222218_s_at | PILRA    | paired immunogl   | 0.23  | -2.12 | 0.00 | 0.00 |
| 222150_s_at | PION     | pigeon homolog    | 0.26  | -1.96 | 0.00 | 0.00 |

|             |          |                    |       |       |      |      |
|-------------|----------|--------------------|-------|-------|------|------|
| 213142_x_at | PION     | pigeon homolog     | 0.21  | -2.24 | 0.00 | 0.00 |
| 205632_s_at | PIP5K1B  | phosphatidylinos   | 0.21  | -2.25 | 0.00 | 0.00 |
| 209587_at   | PITX1    | paired-like home   | 8.36  | 3.06  | 0.00 | 0.00 |
| 208502_s_at | PITX1    | paired-like home   | 6.93  | 2.79  | 0.00 | 0.00 |
| 221061_at   | PKD2L1   | polycystic kidney  | 5.06  | 2.34  | 0.00 | 0.00 |
| 204267_x_at | PKMYT1   | protein kinase, n  | 3.55  | 1.83  | 0.00 | 0.00 |
| 212629_s_at | PKN2     | protein kinase N.  | 0.30  | -1.73 | 0.00 | 0.00 |
| 205724_at   | PKP1     | plakophilin 1 (ec  | 3.26  | 1.71  | 0.00 | 0.00 |
| 205372_at   | PLAG1    | pleiomorphic ad    | 0.30  | -1.74 | 0.00 | 0.00 |
| 209318_x_at | PLAGL1   | pleiomorphic ad    | 0.25  | -2.00 | 0.00 | 0.00 |
| 207943_x_at | PLAGL1   | pleiomorphic ad    | 0.25  | -2.01 | 0.00 | 0.00 |
| 207002_s_at | PLAGL1   | pleiomorphic ad    | 0.19  | -2.42 | 0.00 | 0.00 |
| 201860_s_at | PLAT     | plasminogen act    | 4.17  | 2.06  | 0.00 | 0.00 |
| 211924_s_at | PLAUR    | plasminogen act    | 3.19  | 1.67  | 0.00 | 0.00 |
| 219011_at   | PLEKHA4  | pleckstrin homol   | 3.99  | 2.00  | 0.00 | 0.00 |
| 219566_at   | PLEKHF1  | pleckstrin homol   | 6.02  | 2.59  | 0.00 | 0.00 |
| 205190_at   | PLS1     | plastin 1 (I isofo | 0.20  | -2.31 | 0.00 | 0.00 |
| 56197_at    | PLSCR3   | phospholipid scr   | 3.32  | 1.73  | 0.00 | 0.00 |
| 179_at      | PMS2L11  | postmeiotic segr   | 12.07 | 3.59  | 0.00 | 0.00 |
| 212036_s_at | PNN      | pinin, desmosom    | 0.24  | -2.05 | 0.00 | 0.00 |
| 39854_r_at  | PNPLA2   | patatin-like phos  | 7.42  | 2.89  | 0.00 | 0.00 |
| 219756_s_at | POF1B    | premature ovaric   | 0.30  | -1.76 | 0.02 | 0.04 |
| 219317_at   | POLI     | polymerase (DN.    | 0.27  | -1.90 | 0.00 | 0.00 |
| 60815_at    | POLR2J4  | polymerase (RN.    | 0.17  | -2.60 | 0.00 | 0.00 |
| 220632_s_at | POMT2    | protein-O-mann     | 3.64  | 1.87  | 0.00 | 0.00 |
| 213695_at   | PON3     | paraoxonase 3      | 5.11  | 2.35  | 0.00 | 0.00 |
| 210809_s_at | POSTN    | periostin, osteob  | 0.21  | -2.28 | 0.00 | 0.00 |
| 214981_at   | POSTN    | periostin, osteob  | 0.15  | -2.76 | 0.00 | 0.00 |
| 211660_at   | POU2F2   | POU class 2 hor    | 3.03  | 1.60  | 0.00 | 0.00 |
| 216332_at   | POU6F1   | POU class 6 hor    | 3.65  | 1.87  | 0.00 | 0.00 |
| 212230_at   | PPAP2B   | phosphatidic aci   | 0.30  | -1.75 | 0.00 | 0.00 |
| 219195_at   | PPARGC1A | peroxisome proli   | 0.23  | -2.14 | 0.00 | 0.00 |
| 209433_s_at | PPAT     | phosphoribosyl r   | 0.32  | -1.66 | 0.00 | 0.00 |
| 218010_x_at | PPDPF    | pancreatic proge   | 3.01  | 1.59  | 0.00 | 0.00 |
| 213368_x_at | PPFIA3   | protein tyrosine p | 4.08  | 2.03  | 0.00 | 0.00 |
| 214374_s_at | PPFIBP1  | PTPRF interactir   | 0.19  | -2.38 | 0.00 | 0.00 |
| 217602_at   | PPIA     | peptidylprolyl iso | 0.12  | -3.11 | 0.00 | 0.00 |
| 210407_at   | PPM1A    | protein phosphal   | 0.33  | -1.62 | 0.00 | 0.00 |
| 201603_at   | PPP1R12A | protein phosphal   | 0.28  | -1.86 | 0.00 | 0.00 |
| 202165_at   | PPP1R2   | protein phosphal   | 0.32  | -1.64 | 0.00 | 0.00 |
| 202166_s_at | PPP1R2   | protein phosphal   | 0.30  | -1.72 | 0.01 | 0.02 |
| 204284_at   | PPP1R3C  | protein phosphal   | 3.19  | 1.67  | 0.01 | 0.02 |
| 204554_at   | PPP1R3D  | protein phosphal   | 0.30  | -1.75 | 0.00 | 0.00 |
| 209632_at   | PPP2R3A  | protein phosphal   | 0.23  | -2.11 | 0.00 | 0.00 |
| 32541_at    | PPP3CC   | protein phosphal   | 0.31  | -1.72 | 0.00 | 0.00 |
| 215705_at   | PPP5C    | protein phosphal   | 3.61  | 1.85  | 0.00 | 0.00 |
| 213483_at   | PPWD1    | peptidylprolyl iso | 0.24  | -2.04 | 0.00 | 0.00 |
| 216458_at   | PQLC3    | PQ loop repeat c   | 3.90  | 1.96  | 0.00 | 0.00 |

|             |           |                    |      |       |      |      |
|-------------|-----------|--------------------|------|-------|------|------|
| 211531_x_at | PRB1      | proline-rich prote | 5.41 | 2.44  | 0.00 | 0.00 |
| 210597_x_at | PRB1      | proline-rich prote | 3.25 | 1.70  | 0.00 | 0.00 |
| 205628_at   | PRIM2     | primase, DNA, p    | 0.23 | -2.12 | 0.00 | 0.00 |
| 204843_s_at | PRKAR2A   | protein kinase, c  | 3.53 | 1.82  | 0.00 | 0.00 |
| 203680_at   | PRKAR2B   | protein kinase, c  | 0.26 | -1.95 | 0.00 | 0.00 |
| 207957_s_at | PRKCB     | protein kinase C   | 0.22 | -2.19 | 0.00 | 0.00 |
| 202178_at   | PRKCZ     | protein kinase C   | 3.09 | 1.63  | 0.00 | 0.00 |
| 218236_s_at | PRKD3     | protein kinase D   | 0.33 | -1.60 | 0.00 | 0.00 |
| 210476_s_at | PRLR      | prolactin recepto  | 3.94 | 1.98  | 0.00 | 0.00 |
| 211223_at   | PROP1     | PROP paired-lik    | 3.09 | 1.63  | 0.00 | 0.00 |
| 214941_s_at | PRPF40A   | PRP40 pre-mRN      | 4.74 | 2.25  | 0.00 | 0.00 |
| 205402_x_at | PRSS2     | protease, serine   | 6.90 | 2.79  | 0.00 | 0.00 |
| 202525_at   | PRSS8     | protease, serine   | 3.18 | 1.67  | 0.00 | 0.00 |
| 208102_s_at | PSD       | pleckstrin and S   | 3.24 | 1.69  | 0.00 | 0.00 |
| 203354_s_at | PSD3      | pleckstrin and S   | 0.31 | -1.68 | 0.00 | 0.00 |
| 208257_x_at | PSG1      | pregnancy speci    | 3.38 | 1.76  | 0.00 | 0.00 |
| 205602_x_at | PSG7      | pregnancy speci    | 3.06 | 1.62  | 0.00 | 0.00 |
| 209337_at   | PSIP1     | PC4 and SFRS1      | 0.32 | -1.65 | 0.00 | 0.00 |
| 204279_at   | PSMB9     | proteasome (pro    | 3.80 | 1.92  | 0.00 | 0.00 |
| 212220_at   | PSME4     | proteasome (pro    | 0.22 | -2.16 | 0.00 | 0.00 |
| 220635_at   | PSORS1C2  | psoriasis suscep   | 4.03 | 2.01  | 0.00 | 0.00 |
| 205048_s_at | PSPH      | phosphoserine p    | 0.10 | -3.29 | 0.00 | 0.00 |
| 211661_x_at | PTAFR     | platelet-activatin | 3.22 | 1.69  | 0.00 | 0.00 |
| 219658_at   | PTCD2     | pentatricopeptid   | 0.24 | -2.06 | 0.00 | 0.00 |
| 218967_s_at | PTER      | phosphotriestera   | 0.11 | -3.20 | 0.00 | 0.00 |
| 214391_x_at | PTGER1    | prostaglandin E    | 9.24 | 3.21  | 0.00 | 0.00 |
| 207650_x_at | PTGER1    | prostaglandin E    | 4.55 | 2.19  | 0.00 | 0.00 |
| 211909_x_at | PTGER3    | prostaglandin E    | 0.27 | -1.92 | 0.00 | 0.00 |
| 210374_x_at | PTGER3    | prostaglandin E    | 0.23 | -2.12 | 0.00 | 0.00 |
| 210832_x_at | PTGER3    | prostaglandin E    | 0.22 | -2.17 | 0.00 | 0.00 |
| 205911_at   | PTH1R     | parathyroid horr   | 0.20 | -2.33 | 0.00 | 0.00 |
| 204201_s_at | PTPN13    | protein tyrosine j | 0.31 | -1.69 | 0.00 | 0.00 |
| 211320_s_at | PTPRU     | protein tyrosine j | 4.62 | 2.21  | 0.00 | 0.00 |
| 218944_at   | PYCRL     | pyrroline-5-carbc  | 3.31 | 1.73  | 0.00 | 0.00 |
| 212263_at   | QKI       | quaking homolog    | 0.23 | -2.10 | 0.00 | 0.00 |
| 201482_at   | QSOX1     | quiescin Q6 sulfl  | 3.51 | 1.81  | 0.00 | 0.00 |
| 214999_s_at | RAB11FIP3 | RAB11 family int   | 0.17 | -2.57 | 0.00 | 0.00 |
| 208733_at   | RAB2A     | RAB2A, member      | 0.18 | -2.51 | 0.00 | 0.00 |
| 221014_s_at | RAB33B    | RAB33B, memb       | 0.26 | -1.93 | 0.00 | 0.00 |
| 217597_x_at | RAB40B    | RAB40B, memb       | 3.17 | 1.66  | 0.00 | 0.00 |
| 213466_at   | RAB40C    | RAB40C, memb       | 5.55 | 2.47  | 0.00 | 0.00 |
| 204146_at   | RAD51AP1  | RAD51 associati    | 0.24 | -2.09 | 0.00 | 0.00 |
| 209051_s_at | RALGDS    | ral guanine nucle  | 6.42 | 2.68  | 0.00 | 0.00 |
| 210552_s_at | RALGPS1   | Ral GEF with PT    | 0.26 | -1.92 | 0.00 | 0.00 |
| 220338_at   | RALGPS2   | Ral GEF with PT    | 0.29 | -1.81 | 0.00 | 0.00 |
| 202639_s_at | RANBP3    | RAN binding pro    | 3.35 | 1.74  | 0.00 | 0.00 |
| 212125_at   | RANGAP1   | Ran GTPase act     | 3.85 | 1.94  | 0.00 | 0.00 |
| 215992_s_at | RAPGEF2   | Rap guanine nuc    | 0.11 | -3.14 | 0.00 | 0.00 |



|             |               |                     |       |       |      |      |
|-------------|---------------|---------------------|-------|-------|------|------|
| 219112_at   | RAPGEF6       | Rap guanine nuc     | 0.33  | -1.59 | 0.00 | 0.00 |
| 204189_at   | RARG          | retinoic acid rece  | 3.59  | 1.85  | 0.00 | 0.00 |
| 214369_s_at | RASGRP2       | RAS guanyl rele     | 0.21  | -2.23 | 0.00 | 0.00 |
| 202034_x_at | RB1CC1        | RB1-inducible cc    | 0.29  | -1.79 | 0.00 | 0.00 |
| 219222_at   | RBKS          | ribokinase          | 3.96  | 1.99  | 0.00 | 0.00 |
| 205296_at   | RBL1          | retinoblastoma-li   | 0.27  | -1.87 | 0.00 | 0.00 |
| 212331_at   | RBL2          | retinoblastoma-li   | 0.28  | -1.86 | 0.00 | 0.00 |
| 51228_at    | RBM12B        | RNA binding mo      | 0.20  | -2.30 | 0.00 | 0.00 |
| 219754_at   | RBM41         | RNA binding mo      | 0.24  | -2.05 | 0.00 | 0.00 |
| 217856_at   | RBM8A         | RNA binding mo      | 0.32  | -1.62 | 0.00 | 0.00 |
| 220201_at   | RC3H2         | ring finger and C   | 3.37  | 1.75  | 0.00 | 0.00 |
| 218352_at   | RCBTB1        | regulator of chro   | 0.18  | -2.45 | 0.00 | 0.00 |
| 212612_at   | RCOR1         | REST corepress      | 0.33  | -1.61 | 0.00 | 0.00 |
| 206753_at   | RDH16         | retinol dehydrog    | 9.13  | 3.19  | 0.00 | 0.00 |
| 212917_x_at | RECQL         | RecQ protein-lik    | 0.30  | -1.76 | 0.00 | 0.00 |
| 205205_at   | RELB          | v-rel reticuloendr  | 5.50  | 2.46  | 0.00 | 0.00 |
| 216834_at   | RGS1          | regulator of G-pr   | 7.26  | 2.86  | 0.00 | 0.00 |
| 204316_at   | RGS10         | regulator of G-pr   | 3.70  | 1.89  | 0.00 | 0.00 |
| 202388_at   | RGS2          | regulator of G-pr   | 0.26  | -1.96 | 0.00 | 0.00 |
| 219554_at   | RHCG          | Rh family, C glyco  | 24.23 | 4.60  | 0.00 | 0.00 |
| 212651_at   | RHOBTB1       | Rho-related BTB     | 0.33  | -1.59 | 0.00 | 0.00 |
| 202975_s_at | RHOBTB3       | Rho-related BTB     | 0.30  | -1.76 | 0.00 | 0.00 |
| 202976_s_at | RHOBTB3       | Rho-related BTB     | 0.15  | -2.71 | 0.00 | 0.00 |
| 31846_at    | RHOD          | ras homolog gene    | 5.21  | 2.38  | 0.00 | 0.00 |
| 214700_x_at | RIF1          | RAP1 interactin     | 0.23  | -2.10 | 0.00 | 0.00 |
| 218598_at   | RINT1         | RAD50 interacto     | 0.27  | -1.87 | 0.00 | 0.00 |
| 218979_at   | RMI1          | RMI1, RecQ me       | 0.33  | -1.62 | 0.00 | 0.00 |
| 213566_at   | RNASE6        | ribonuclease, RN    | 3.09  | 1.63  | 0.00 | 0.00 |
| 203022_at   | RNASEH2A      | ribonuclease H2     | 3.42  | 1.78  | 0.00 | 0.00 |
| 210056_at   | RND1          | Rho family GTPe     | 3.78  | 1.92  | 0.00 | 0.00 |
| 221063_x_at | RNF123        | ring finger protei  | 4.20  | 2.07  | 0.00 | 0.00 |
| 207735_at   | RNF125        | ring finger protei  | 0.10  | -3.33 | 0.00 | 0.00 |
| 220985_s_at | RNF170        | ring finger protei  | 0.28  | -1.87 | 0.00 | 0.00 |
| 218394_at   | ROGDI         | rogdi homolog (L    | 6.05  | 2.60  | 0.00 | 0.00 |
| 220436_at   | RP11-138L21.1 | similar to cell rec | 0.23  | -2.10 | 0.00 | 0.00 |
| 205191_at   | RP2           | retinitis pigment   | 0.10  | -3.27 | 0.00 | 0.00 |
| 218499_at   | RP6-213H19.1  | serine/threonine    | 0.28  | -1.81 | 0.00 | 0.00 |
| 218842_at   | RPAP3         | RNA polymerase      | 0.27  | -1.87 | 0.00 | 0.00 |
| 213223_at   | RPL28         | ribosomal protei    | 4.86  | 2.28  | 0.00 | 0.00 |
| 219143_s_at | RPP25         | ribonuclease P/l    | 3.42  | 1.77  | 0.00 | 0.00 |
| 213098_at   | RQCD1         | RCD1 required f     | 3.40  | 1.76  | 0.00 | 0.00 |
| 209773_s_at | RRM2          | ribonucleotide re   | 5.16  | 2.37  | 0.00 | 0.01 |
| 218758_s_at | RRP1          | ribosomal RNA p     | 3.66  | 1.87  | 0.00 | 0.00 |
| 214764_at   | RRP15         | ribosomal RNA p     | 0.25  | -2.02 | 0.00 | 0.00 |
| 33307_at    | RRP7A         | ribosomal RNA p     | 3.31  | 1.73  | 0.00 | 0.00 |
| 204133_at   | RRP9          | ribosomal RNA p     | 4.01  | 2.01  | 0.00 | 0.00 |
| 218166_s_at | RSF1          | remodeling and s    | 0.19  | -2.38 | 0.00 | 0.00 |
| 219507_at   | RSRC1         | arginine/serine-r   | 0.29  | -1.77 | 0.00 | 0.00 |

|             |           |                    |        |       |      |      |
|-------------|-----------|--------------------|--------|-------|------|------|
| 210222_s_at | RTN1      | reticulon 1        | 0.22   | -2.16 | 0.00 | 0.00 |
| 203485_at   | RTN1      | reticulon 1        | 0.20   | -2.35 | 0.00 | 0.00 |
| 219684_at   | RTP4      | receptor (chemo    | 4.85   | 2.28  | 0.00 | 0.00 |
| 213430_at   | RUFY3     | RUN and FYVE       | 0.29   | -1.81 | 0.00 | 0.00 |
| 213939_s_at | RUFY3     | RUN and FYVE       | 0.26   | -1.97 | 0.00 | 0.00 |
| 203724_s_at | RUFY3     | RUN and FYVE       | 0.24   | -2.05 | 0.00 | 0.00 |
| 215321_at   | RUNDC3B   | RUN domain cor     | 0.31   | -1.69 | 0.00 | 0.00 |
| 209360_s_at | RUNX1     | runt-related trans | 10.47  | 3.39  | 0.00 | 0.00 |
| 213066_at   | RUSC2     | RUN and SH3 di     | 4.21   | 2.07  | 0.00 | 0.00 |
| 205863_at   | S100A12   | S100 calcium bir   | 4.49   | 2.17  | 0.01 | 0.02 |
| 205916_at   | S100A7    | S100 calcium bir   | 98.52  | 6.62  | 0.00 | 0.00 |
| 202917_s_at | S100A8    | S100 calcium bir   | 156.56 | 7.29  | 0.00 | 0.00 |
| 214370_at   | S100A8    | S100 calcium bir   | 30.77  | 4.94  | 0.00 | 0.00 |
| 203535_at   | S100A9    | S100 calcium bir   | 432.94 | 8.76  | 0.00 | 0.00 |
| 204351_at   | S100P     | S100 calcium bir   | 22.94  | 4.52  | 0.00 | 0.00 |
| 204642_at   | S1PR1     | sphingosine-1-pl   | 0.30   | -1.73 | 0.00 | 0.00 |
| 203280_at   | SAFB2     | scaffold attachm   | 3.80   | 1.93  | 0.00 | 0.00 |
| 218702_at   | SARS2     | seryl-tRNA synt    | 3.27   | 1.71  | 0.00 | 0.00 |
| 212417_at   | SCAMP1    | secretory carrier  | 0.25   | -2.01 | 0.00 | 0.00 |
| 215754_at   | SCARB2    | scavenger recep    | 0.27   | -1.89 | 0.00 | 0.00 |
| 200831_s_at | SCD       | stearoyl-CoA de:   | 3.19   | 1.67  | 0.00 | 0.00 |
| 211708_s_at | SCD       | stearoyl-CoA de:   | 3.13   | 1.64  | 0.00 | 0.00 |
| 215548_s_at | SCFD1     | sec1 family dom    | 0.28   | -1.83 | 0.00 | 0.00 |
| 215026_x_at | SCNN1A    | sodium channel,    | 4.02   | 2.01  | 0.00 | 0.00 |
| 205241_at   | SCO2      | SCO cytochrome     | 4.17   | 2.06  | 0.00 | 0.00 |
| 219234_x_at | SCRN3     | secernin 3         | 0.33   | -1.60 | 0.00 | 0.00 |
| 205695_at   | SDS       | serine dehydrata   | 4.29   | 2.10  | 0.00 | 0.00 |
| 215209_at   | SEC24D    | SEC24 family, m    | 0.33   | -1.62 | 0.00 | 0.00 |
| 202375_at   | SEC24D    | SEC24 family, m    | 0.31   | -1.68 | 0.00 | 0.00 |
| 201915_at   | SEC63     | SEC63 homolog      | 0.31   | -1.70 | 0.00 | 0.00 |
| 212450_at   | SECISBP2L | SECIS binding p    | 0.32   | -1.62 | 0.00 | 0.00 |
| 213716_s_at | SECTM1    | secreted and tra   | 4.68   | 2.23  | 0.00 | 0.00 |
| 209880_s_at | SELPLG    | selectin P ligand  | 4.02   | 2.01  | 0.00 | 0.00 |
| 205405_at   | SEMA5A    | sema domain, se    | 3.77   | 1.91  | 0.00 | 0.00 |
| 208100_x_at | SEMA6C    | sema domain, tr    | 3.81   | 1.93  | 0.00 | 0.00 |
| 218122_s_at | SENP2     | SUMO1/sentrin/     | 4.60   | 2.20  | 0.00 | 0.00 |
| 202319_at   | SENP6     | SUMO1/sentrin :    | 0.30   | -1.72 | 0.00 | 0.00 |
| 214790_at   | SENP6     | SUMO1/sentrin :    | 0.11   | -3.19 | 0.00 | 0.00 |
| 202376_at   | SERPINA3  | serpin peptidase   | 20.39  | 4.35  | 0.00 | 0.00 |
| 209719_x_at | SERPINB3  | serpin peptidase   | 68.72  | 6.10  | 0.00 | 0.00 |
| 209720_s_at | SERPINB3  | serpin peptidase   | 24.85  | 4.64  | 0.00 | 0.00 |
| 211906_s_at | SERPINB4  | serpin peptidase   | 24.06  | 4.59  | 0.00 | 0.00 |
| 202628_s_at | SERPINE1  | serpin peptidase   | 4.05   | 2.02  | 0.00 | 0.00 |
| 215038_s_at | SETD2     | SET domain con     | 0.24   | -2.06 | 0.00 | 0.00 |
| 216047_x_at | SEZ6L     | seizure related 6  | 3.68   | 1.88  | 0.00 | 0.00 |
| 202036_s_at | SFRP1     | secreted frizzled  | 4.30   | 2.11  | 0.00 | 0.01 |
| 202037_s_at | SFRP1     | secreted frizzled  | 3.63   | 1.86  | 0.01 | 0.03 |
| 207468_s_at | SFRP5     | secreted frizzled  | 3.94   | 1.98  | 0.00 | 0.00 |

|             |           |                    |      |       |      |      |
|-------------|-----------|--------------------|------|-------|------|------|
| 208863_s_at | SFRS1     | splicing factor, a | 0.24 | -2.03 | 0.00 | 0.00 |
| 217608_at   | SFRS12IP1 | SFRS12-interact    | 0.18 | -2.47 | 0.00 | 0.00 |
| 222310_at   | SFRS15    | splicing factor, a | 0.32 | -1.63 | 0.00 | 0.00 |
| 214838_at   | SFT2D2    | SFT2 domain co     | 3.71 | 1.89  | 0.00 | 0.00 |
| 38691_s_at  | SFTPC     | surfactant protei  | 3.91 | 1.97  | 0.00 | 0.00 |
| 214387_x_at | SFTPC     | surfactant protei  | 3.28 | 1.71  | 0.00 | 0.00 |
| 207302_at   | SGCG      | sarcoglycan, gar   | 0.21 | -2.24 | 0.00 | 0.00 |
| 201739_at   | SGK1      | serum/glucocorti   | 3.50 | 1.81  | 0.00 | 0.00 |
| 215519_x_at | SGSM3     | small G protein ε  | 3.03 | 1.60  | 0.00 | 0.00 |
| 205637_s_at | SH3GL3    | SH3-domain GR      | 5.99 | 2.58  | 0.00 | 0.00 |
| 204657_s_at | SHB       | Src homology 2     | 3.59 | 1.84  | 0.00 | 0.00 |
| 216537_s_at | SIGLEC7   | sialic acid bindin | 4.10 | 2.04  | 0.00 | 0.00 |
| 221705_s_at | SIKE1     | suppressor of IK   | 0.24 | -2.04 | 0.00 | 0.00 |
| 37831_at    | SIPA1L3   | signal-induced p   | 5.28 | 2.40  | 0.00 | 0.00 |
| 49327_at    | SIRT3     | sirtuin (silent ma | 6.05 | 2.60  | 0.00 | 0.00 |
| 220047_at   | SIRT4     | sirtuin (silent ma | 0.30 | -1.75 | 0.00 | 0.00 |
| 219613_s_at | SIRT6     | sirtuin (silent ma | 3.79 | 1.92  | 0.00 | 0.00 |
| 210567_s_at | SKP2      | S-phase kinase-    | 0.33 | -1.60 | 0.00 | 0.00 |
| 218066_at   | SLC12A7   | solute carrier fan | 3.70 | 1.89  | 0.00 | 0.00 |
| 205243_at   | SLC13A3   | solute carrier fan | 4.61 | 2.21  | 0.00 | 0.00 |
| 210807_s_at | SLC16A7   | solute carrier fan | 0.27 | -1.89 | 0.00 | 0.00 |
| 207057_at   | SLC16A7   | solute carrier fan | 0.08 | -3.73 | 0.00 | 0.00 |
| 209237_s_at | SLC23A2   | solute carrier fan | 3.17 | 1.67  | 0.00 | 0.00 |
| 204342_at   | SLC25A24  | solute carrier fan | 0.29 | -1.81 | 0.00 | 0.00 |
| 201918_at   | SLC25A36  | solute carrier fan | 0.13 | -2.97 | 0.00 | 0.00 |
| 219344_at   | SLC29A3   | solute carrier fan | 5.35 | 2.42  | 0.00 | 0.00 |
| 201249_at   | SLC2A1    | solute carrier fan | 3.99 | 2.00  | 0.00 | 0.00 |
| 202497_x_at | SLC2A3    | solute carrier fan | 0.31 | -1.67 | 0.00 | 0.00 |
| 219991_at   | SLC2A9    | solute carrier fan | 4.56 | 2.19  | 0.00 | 0.00 |
| 207035_at   | SLC30A3   | solute carrier fan | 6.43 | 2.69  | 0.00 | 0.00 |
| 203971_at   | SLC31A1   | solute carrier fan | 3.66 | 1.87  | 0.00 | 0.00 |
| 209865_at   | SLC35A3   | solute carrier fan | 0.22 | -2.17 | 0.00 | 0.00 |
| 220413_at   | SLC39A2   | solute carrier fan | 6.12 | 2.61  | 0.00 | 0.00 |
| 219175_s_at | SLC41A3   | solute carrier fan | 3.79 | 1.92  | 0.00 | 0.00 |
| 222364_at   | SLC44A1   | solute carrier fan | 0.27 | -1.89 | 0.00 | 0.00 |
| 207771_at   | SLC5A2    | solute carrier fan | 3.37 | 1.75  | 0.00 | 0.00 |
| 211123_at   | SLC5A5    | solute carrier fan | 3.29 | 1.72  | 0.00 | 0.00 |
| 208494_at   | SLC6A7    | solute carrier fan | 3.34 | 1.74  | 0.00 | 0.00 |
| 208015_at   | SMAD1     | SMAD family me     | 0.21 | -2.27 | 0.00 | 0.00 |
| 202527_s_at | SMAD4     | SMAD family me     | 0.33 | -1.60 | 0.00 | 0.00 |
| 205187_at   | SMAD5     | SMAD family me     | 0.06 | -4.03 | 0.00 | 0.00 |
| 206542_s_at | SMARCA2   | SWI/SNF relatec    | 0.22 | -2.21 | 0.00 | 0.00 |
| 208793_x_at | SMARCA4   | SWI/SNF relatec    | 3.47 | 1.80  | 0.00 | 0.00 |
| 209257_s_at | SMC3      | structural mainte  | 0.29 | -1.77 | 0.00 | 0.00 |
| 209258_s_at | SMC3      | structural mainte  | 0.28 | -1.86 | 0.00 | 0.00 |
| 212579_at   | SMCHD1    | structural mainte  | 0.19 | -2.38 | 0.00 | 0.00 |
| 220368_s_at | SMEK1     | SMEK homolog       | 0.31 | -1.70 | 0.00 | 0.00 |
| 222270_at   | SMEK2     | SMEK homolog :     | 0.15 | -2.79 | 0.00 | 0.00 |

|             |         |                    |       |       |      |      |
|-------------|---------|--------------------|-------|-------|------|------|
| 210057_at   | SMG1    | SMG1 homolog,      | 0.12  | -3.10 | 0.00 | 0.00 |
| 219695_at   | SMPD3   | sphingomyelin p    | 7.00  | 2.81  | 0.00 | 0.00 |
| 213624_at   | SMPDL3A | sphingomyelin p    | 0.28  | -1.86 | 0.00 | 0.00 |
| 204104_at   | SNAPC2  | small nuclear RN   | 3.27  | 1.71  | 0.00 | 0.00 |
| 222286_at   | SNAPC3  | small nuclear RN   | 0.24  | -2.04 | 0.00 | 0.00 |
| 53912_at    | SNX11   | sorting nexin 11   | 3.29  | 1.72  | 0.00 | 0.00 |
| 219793_at   | SNX16   | sorting nexin 16   | 0.18  | -2.45 | 0.00 | 0.00 |
| 221498_at   | SNX27   | sorting nexin fam  | 0.29  | -1.77 | 0.00 | 0.00 |
| 218087_s_at | SORBS1  | sorbin and SH3 r   | 0.05  | -4.26 | 0.00 | 0.00 |
| 202936_s_at | SOX9    | SRY (sex determ    | 3.08  | 1.62  | 0.01 | 0.02 |
| 209748_at   | SPAST   | spastin            | 0.33  | -1.60 | 0.00 | 0.00 |
| 204433_s_at | SPATA2  | spermatogenesis    | 3.03  | 1.60  | 0.00 | 0.00 |
| 220298_s_at | SPATA6  | spermatogenesis    | 0.19  | -2.40 | 0.00 | 0.00 |
| 219583_s_at | SPATA7  | spermatogenesis    | 0.18  | -2.48 | 0.00 | 0.00 |
| 213442_x_at | SPDEF   | SAM pointed do     | 7.95  | 2.99  | 0.00 | 0.00 |
| 213441_x_at | SPDEF   | SAM pointed do     | 6.74  | 2.75  | 0.00 | 0.00 |
| 220192_x_at | SPDEF   | SAM pointed do     | 5.88  | 2.56  | 0.00 | 0.00 |
| 214404_x_at | SPDEF   | SAM pointed do     | 3.87  | 1.95  | 0.00 | 0.00 |
| 212526_at   | SPG20   | spastic parapleg   | 0.29  | -1.80 | 0.00 | 0.00 |
| 217813_s_at | SPIN1   | spindlin 1         | 0.16  | -2.69 | 0.00 | 0.00 |
| 206239_s_at | SPINK1  | serine peptidase   | 0.24  | -2.07 | 0.00 | 0.00 |
| 206057_x_at | SPN     | sialophorin        | 3.57  | 1.84  | 0.00 | 0.00 |
| 202523_s_at | SPOCK2  | sparc/osteonecti   | 4.24  | 2.09  | 0.00 | 0.00 |
| 218638_s_at | SPON2   | spondin 2, extrac  | 0.33  | -1.62 | 0.01 | 0.02 |
| 203458_at   | SPR     | sepiapterin redu   | 4.23  | 2.08  | 0.00 | 0.00 |
| 214549_x_at | SPRR1A  | small proline-ric  | 12.19 | 3.61  | 0.00 | 0.00 |
| 213796_at   | SPRR1A  | small proline-ric  | 8.30  | 3.05  | 0.00 | 0.01 |
| 214925_s_at | SPTAN1  | spectrin, alpha, r | 0.25  | -2.00 | 0.00 | 0.00 |
| 220185_at   | SPTBN4  | spectrin, beta, n  | 4.13  | 2.05  | 0.00 | 0.00 |
| 38766_at    | SRCAP   | Snf2-related CRI   | 3.72  | 1.90  | 0.00 | 0.00 |
| 218800_at   | SRD5A3  | steroid 5 alpha-r  | 0.29  | -1.79 | 0.00 | 0.00 |
| 201248_s_at | SREBF2  | sterol regulatory  | 3.87  | 1.95  | 0.00 | 0.00 |
| 201859_at   | SRGN    | serglycin          | 5.07  | 2.34  | 0.00 | 0.00 |
| 202199_s_at | SRPK1   | SFRS protein kir   | 3.02  | 1.59  | 0.00 | 0.00 |
| 202817_s_at | SS18    | synovial sarcom    | 0.24  | -2.06 | 0.00 | 0.00 |
| 201138_s_at | SSB     | Sjogren syndrom    | 0.32  | -1.63 | 0.00 | 0.00 |
| 219241_x_at | SSH3    | slingshot homolc   | 3.94  | 1.98  | 0.00 | 0.00 |
| 209023_s_at | STAG2   | stromal antigen ;  | 0.13  | -3.00 | 0.00 | 0.00 |
| 208991_at   | STAT3   | signal transduce   | 3.36  | 1.75  | 0.00 | 0.00 |
| 41657_at    | STK11   | serine/threonine   | 5.74  | 2.52  | 0.00 | 0.00 |
| 211085_s_at | STK4    | serine/threonine   | 0.26  | -1.93 | 0.00 | 0.00 |
| 204701_s_at | STOML1  | stomatin (EPB72    | 3.35  | 1.75  | 0.00 | 0.00 |
| 212800_at   | STX6    | syntaxin 6         | 0.26  | -1.95 | 0.00 | 0.00 |
| 203457_at   | STX7    | syntaxin 7         | 0.29  | -1.77 | 0.00 | 0.00 |
| 220030_at   | STYK1   | serine/threonine   | 3.19  | 1.67  | 0.01 | 0.02 |
| 219425_at   | SULT4A1 | sulfotransferase   | 3.90  | 1.96  | 0.00 | 0.00 |
| 201836_s_at | SUPT7L  | suppressor of Ty   | 0.32  | -1.66 | 0.00 | 0.00 |
| 219389_at   | SUSD4   | sushi domain co    | 9.79  | 3.29  | 0.00 | 0.00 |

|             |          |                    |       |       |      |      |
|-------------|----------|--------------------|-------|-------|------|------|
| 209307_at   | SWAP70   | SWAP switching     | 0.31  | -1.67 | 0.00 | 0.00 |
| 216272_x_at | SYDE1    | synapse defectiv   | 3.73  | 1.90  | 0.00 | 0.00 |
| 209447_at   | SYNE1    | spectrin repeat c  | 0.20  | -2.34 | 0.00 | 0.00 |
| 210612_s_at | SYNJ2    | synaptojanin 2     | 0.31  | -1.67 | 0.00 | 0.00 |
| 212730_at   | SYNM     | synemin, interme   | 0.31  | -1.70 | 0.01 | 0.02 |
| 215865_at   | SYT12    | synaptotagmin X    | 8.49  | 3.09  | 0.00 | 0.00 |
| 206552_s_at | TAC1     | tachykinin, precu  | 0.20  | -2.33 | 0.00 | 0.00 |
| 214690_at   | TAF1B    | TATA box bindin    | 0.18  | -2.47 | 0.00 | 0.00 |
| 221617_at   | TAF9B    | TAF9B RNA pol      | 0.16  | -2.64 | 0.00 | 0.00 |
| 204769_s_at | TAP2     | transporter 2, AT  | 5.62  | 2.49  | 0.00 | 0.00 |
| 221264_s_at | TARDBP   | TAR DNA bindin     | 0.26  | -1.96 | 0.00 | 0.00 |
| 213786_at   | TAX1BP1  | Tax1 (human T-c    | 0.32  | -1.64 | 0.00 | 0.00 |
| 219682_s_at | TBX3     | T-box 3            | 0.32  | -1.65 | 0.00 | 0.00 |
| 212382_at   | TCF4     | transcription fact | 0.32  | -1.65 | 0.00 | 0.00 |
| 203753_at   | TCF4     | transcription fact | 0.30  | -1.72 | 0.00 | 0.00 |
| 222146_s_at | TCF4     | transcription fact | 0.30  | -1.76 | 0.00 | 0.00 |
| 212387_at   | TCF4     | transcription fact | 0.26  | -1.96 | 0.00 | 0.00 |
| 212386_at   | TCF4     | transcription fact | 0.26  | -1.97 | 0.00 | 0.00 |
| 212762_s_at | TCF7L2   | transcription fact | 0.26  | -1.96 | 0.00 | 0.00 |
| 205513_at   | TCN1     | transcobalamin I   | 13.59 | 3.77  | 0.00 | 0.00 |
| 208089_s_at | TDRD3    | tudor domain coi   | 0.20  | -2.33 | 0.00 | 0.00 |
| 213361_at   | TDRD7    | tudor domain coi   | 0.20  | -2.30 | 0.00 | 0.00 |
| 212084_at   | TEX261   | testis expressed   | 3.83  | 1.94  | 0.00 | 0.00 |
| 204654_s_at | TFAP2A   | transcription fact | 0.14  | -2.88 | 0.00 | 0.00 |
| 219735_s_at | TFCP2L1  | transcription fact | 3.52  | 1.81  | 0.00 | 0.00 |
| 208944_at   | TGFBR2   | transforming gro   | 0.22  | -2.21 | 0.00 | 0.00 |
| 206008_at   | TGM1     | transglutaminase   | 5.99  | 2.58  | 0.00 | 0.00 |
| 219596_at   | THAP10   | THAP domain cc     | 0.29  | -1.76 | 0.00 | 0.00 |
| 1316_at     | THRA     | thyroid hormone    | 0.31  | -1.69 | 0.00 | 0.00 |
| 218408_at   | TIMM10   | translocase of in  | 3.28  | 1.71  | 0.00 | 0.00 |
| 201148_s_at | TIMP3    | TIMP metallopro    | 7.71  | 2.95  | 0.00 | 0.00 |
| 203222_s_at | TLE1     | transducin-like e  | 0.18  | -2.51 | 0.00 | 0.00 |
| 216997_x_at | TLE4     | transducin-like e  | 0.32  | -1.64 | 0.00 | 0.00 |
| 204924_at   | TLR2     | toll-like receptor | 3.54  | 1.82  | 0.00 | 0.00 |
| 213882_at   | TM2D1    | TM2 domain con     | 0.22  | -2.21 | 0.00 | 0.00 |
| 209387_s_at | TM4SF1   | transmembrane      | 3.03  | 1.60  | 0.01 | 0.02 |
| 219892_at   | TM6SF1   | transmembrane      | 0.27  | -1.89 | 0.00 | 0.00 |
| 221096_s_at | TMCO6    | transmembrane      | 3.34  | 1.74  | 0.00 | 0.00 |
| 218930_s_at | TMEM106B | transmembrane      | 0.29  | -1.80 | 0.00 | 0.00 |
| 218834_s_at | TMEM132A | transmembrane      | 5.02  | 2.33  | 0.00 | 0.00 |
| 213272_s_at | TMEM159  | transmembrane      | 0.23  | -2.10 | 0.00 | 0.00 |
| 218745_x_at | TMEM161A | transmembrane      | 9.08  | 3.18  | 0.00 | 0.00 |
| 209656_s_at | TMEM47   | transmembrane      | 0.30  | -1.74 | 0.00 | 0.00 |
| 213024_at   | TMF1     | TATA element rr    | 0.26  | -1.97 | 0.00 | 0.00 |
| 220800_s_at | TMOD3    | tropomodulin 3 (   | 0.30  | -1.73 | 0.00 | 0.00 |
| 218960_at   | TMPRSS4  | transmembrane      | 6.94  | 2.80  | 0.00 | 0.00 |
| 221032_s_at | TMPRSS5  | transmembrane      | 6.95  | 2.80  | 0.00 | 0.00 |
| 214955_at   | TMPRSS6  | transmembrane      | 3.08  | 1.62  | 0.00 | 0.00 |

|             |           |                     |      |       |      |      |
|-------------|-----------|---------------------|------|-------|------|------|
| 218368_s_at | TNFRSF12A | tumor necrosis fr   | 4.02 | 2.01  | 0.00 | 0.00 |
| 218856_at   | TNFRSF21  | tumor necrosis fr   | 7.55 | 2.92  | 0.00 | 0.00 |
| 218335_x_at | TNIP2     | TNFAIP3 interac     | 3.40 | 1.77  | 0.00 | 0.00 |
| 206393_at   | TNNI2     | troponin I type 2   | 0.11 | -3.24 | 0.00 | 0.00 |
| 206817_x_at | TNRC4     | trinucleotide repr  | 4.59 | 2.20  | 0.00 | 0.00 |
| 213254_at   | TNRC6B    | trinucleotide repr  | 0.27 | -1.90 | 0.00 | 0.00 |
| 217413_s_at | TNXB      | tenascin XB         | 3.02 | 1.60  | 0.00 | 0.00 |
| 208609_s_at | TNXB      | tenascin XB         | 0.32 | -1.63 | 0.00 | 0.00 |
| 202807_s_at | TOM1      | target of myb1 (c   | 3.87 | 1.95  | 0.00 | 0.00 |
| 214840_at   | TOM1L2    | target of myb1-lil  | 5.23 | 2.39  | 0.00 | 0.00 |
| 201691_s_at | TPD52     | tumor protein D5    | 0.31 | -1.69 | 0.00 | 0.00 |
| 203375_s_at | TPP2      | tripeptidyl peptid  | 0.29 | -1.79 | 0.00 | 0.00 |
| 215220_s_at | TPR       | translocated pro    | 0.09 | -3.54 | 0.00 | 0.00 |
| 210052_s_at | TPX2      | TPX2, microtubu     | 3.65 | 1.87  | 0.00 | 0.00 |
| 221807_s_at | TRABD     | TraB domain cor     | 3.97 | 1.99  | 0.00 | 0.00 |
| 209412_at   | TRAPPC10  | trafficking proteir | 0.29 | -1.81 | 0.00 | 0.00 |
| 56829_at    | TRAPPC9   | trafficking proteir | 7.78 | 2.96  | 0.00 | 0.00 |
| 36742_at    | TRIM15    | tripartite motif-cc | 3.92 | 1.97  | 0.00 | 0.00 |
| 213293_s_at | TRIM22    | tripartite motif-cc | 3.25 | 1.70  | 0.00 | 0.00 |
| 204732_s_at | TRIM23    | tripartite motif-cc | 0.19 | -2.37 | 0.00 | 0.00 |
| 206911_at   | TRIM25    | tripartite motif-cc | 4.01 | 2.00  | 0.00 | 0.00 |
| 212116_at   | TRIM27    | tripartite motif-cc | 3.73 | 1.90  | 0.00 | 0.00 |
| 203610_s_at | TRIM38    | tripartite motif-cc | 4.50 | 2.17  | 0.00 | 0.00 |
| 210705_s_at | TRIM5     | tripartite motif-cc | 0.33 | -1.59 | 0.00 | 0.00 |
| 221897_at   | TRIM52    | tripartite motif-cc | 0.27 | -1.90 | 0.00 | 0.00 |
| 208178_x_at | TRIO      | triple functional c | 0.30 | -1.73 | 0.00 | 0.00 |
| 218877_s_at | TRMT11    | tRNA methyltran     | 0.27 | -1.90 | 0.00 | 0.00 |
| 205802_at   | TRPC1     | transient receptc   | 0.27 | -1.88 | 0.00 | 0.00 |
| 205803_s_at | TRPC1     | transient receptc   | 0.17 | -2.59 | 0.00 | 0.00 |
| 206528_at   | TRPC6     | transient receptc   | 0.26 | -1.94 | 0.00 | 0.00 |
| 217162_at   | TSPY1     | testis specific pr  | 3.50 | 1.81  | 0.00 | 0.00 |
| 213922_at   | TTBK2     | tau tubulin kinas   | 0.10 | -3.31 | 0.00 | 0.00 |
| 219421_at   | TTC33     | tetratricopeptide   | 0.24 | -2.08 | 0.00 | 0.00 |
| 213172_at   | TTC9      | tetratricopeptide   | 0.31 | -1.71 | 0.00 | 0.00 |
| 216323_x_at | TUBA3D    | tubulin, alpha 3d   | 3.18 | 1.67  | 0.00 | 0.00 |
| 214876_s_at | TUBGCP5   | tubulin, gamma c    | 0.18 | -2.51 | 0.00 | 0.00 |
| 203272_s_at | TUSC2     | tumor suppressc     | 3.78 | 1.92  | 0.00 | 0.00 |
| 213943_at   | TWIST1    | twist homolog 1     | 0.24 | -2.05 | 0.00 | 0.00 |
| 216609_at   | TXN       | thioredoxin         | 0.27 | -1.90 | 0.00 | 0.00 |
| 209078_s_at | TXN2      | thioredoxin 2       | 4.00 | 2.00  | 0.00 | 0.00 |
| 201266_at   | TXNRD1    | thioredoxin redu    | 3.57 | 1.84  | 0.00 | 0.00 |
| 59631_at    | TXNRD3    | thioredoxin redu    | 3.54 | 1.83  | 0.00 | 0.00 |
| 204858_s_at | TYMP      | thymidine phosp     | 9.16 | 3.20  | 0.00 | 0.00 |
| 218382_s_at | U2AF2     | U2 small nuclear    | 4.56 | 2.19  | 0.00 | 0.00 |
| 218837_s_at | UBE2D4    | ubiquitin-conjuge   | 6.09 | 2.61  | 0.00 | 0.00 |
| 209041_s_at | UBE2G2    | ubiquitin-conjuge   | 3.04 | 1.60  | 0.00 | 0.00 |
| 217799_x_at | UBE2H     | ubiquitin-conjuge   | 3.38 | 1.76  | 0.00 | 0.00 |
| 211008_s_at | UBE2I     | ubiquitin-conjuge   | 3.83 | 1.94  | 0.00 | 0.00 |

|             |         |                    |       |       |      |      |
|-------------|---------|--------------------|-------|-------|------|------|
| 210685_s_at | UBE4B   | ubiquitination fac | 0.33  | -1.62 | 0.00 | 0.00 |
| 221746_at   | UBL4A   | ubiquitin-like 4A  | 3.57  | 1.83  | 0.00 | 0.00 |
| 207253_s_at | UBN1    | ubinnuclein 1      | 5.09  | 2.35  | 0.00 | 0.00 |
| 204598_at   | UBOX5   | U-box domain cc    | 3.17  | 1.66  | 0.00 | 0.00 |
| 215544_s_at | UBOX5   | U-box domain cc    | 3.02  | 1.59  | 0.00 | 0.00 |
| 212840_at   | UBXN7   | UBX domain pro     | 0.30  | -1.73 | 0.00 | 0.00 |
| 203343_at   | UGDH    | UDP-glucose de     | 0.31  | -1.69 | 0.00 | 0.00 |
| 202330_s_at | UNG     | uracil-DNA glycc   | 0.33  | -1.61 | 0.00 | 0.00 |
| 215886_x_at | USP12   | ubiquitin specific | 0.26  | -1.94 | 0.00 | 0.00 |
| 207213_s_at | USP2    | ubiquitin specific | 3.25  | 1.70  | 0.00 | 0.00 |
| 215013_s_at | USP34   | ubiquitin specific | 0.33  | -1.62 | 0.00 | 0.00 |
| 212065_s_at | USP34   | ubiquitin specific | 0.16  | -2.62 | 0.00 | 0.00 |
| 204761_at   | USP6NL  | USP6 N-termina     | 0.27  | -1.91 | 0.00 | 0.00 |
| 205139_s_at | UST     | uronyl-2-sulfotra  | 0.22  | -2.21 | 0.00 | 0.00 |
| 202172_at   | VEZF1   | vascular endothe   | 0.33  | -1.59 | 0.00 | 0.00 |
| 205946_at   | VIPR2   | vasoactive intest  | 6.12  | 2.61  | 0.00 | 0.00 |
| 220528_at   | VNN3    | vanin 3            | 5.61  | 2.49  | 0.00 | 0.00 |
| 204377_s_at | VPRBP   | Vpr (HIV-1) bind   | 0.20  | -2.29 | 0.00 | 0.00 |
| 218396_at   | VPS13C  | vacuolar protein   | 0.21  | -2.24 | 0.00 | 0.00 |
| 203856_at   | VRK1    | vaccinia related   | 0.27  | -1.89 | 0.00 | 0.00 |
| 202112_at   | VWF     | von Willebrand fi  | 4.82  | 2.27  | 0.00 | 0.00 |
| 218766_s_at | WARS2   | tryptophanyl tRN   | 0.33  | -1.61 | 0.00 | 0.00 |
| 205809_s_at | WASL    | Wiskott-Aldrich s  | 0.30  | -1.73 | 0.00 | 0.00 |
| 203827_at   | WIPI1   | WD repeat doma     | 0.32  | -1.67 | 0.00 | 0.01 |
| 214699_x_at | WIPI2   | WD repeat doma     | 3.04  | 1.60  | 0.00 | 0.00 |
| 205648_at   | WNT2    | wingless-type MI   | 0.25  | -2.00 | 0.00 | 0.00 |
| 71933_at    | WNT6    | wingless-type MI   | 3.56  | 1.83  | 0.00 | 0.00 |
| 212637_s_at | WWP1    | WW domain con      | 0.23  | -2.15 | 0.00 | 0.00 |
| 218911_at   | YEATS4  | YEATS domain c     | 0.14  | -2.89 | 0.00 | 0.00 |
| 209551_at   | YIPF4   | Yip1 domain farr   | 0.33  | -1.60 | 0.00 | 0.00 |
| 221180_at   | YSK4    | YSK4 Sps1/Ste2     | 3.06  | 1.61  | 0.00 | 0.00 |
| 214814_at   | YTHDC1  | YTH domain con     | 0.12  | -3.08 | 0.00 | 0.00 |
| 219836_at   | ZBED2   | zinc finger, BED-  | 5.15  | 2.36  | 0.00 | 0.01 |
| 205092_x_at | ZBTB1   | zinc finger and B  | 0.29  | -1.80 | 0.00 | 0.00 |
| 205883_at   | ZBTB16  | zinc finger and B  | 0.15  | -2.72 | 0.00 | 0.00 |
| 220391_at   | ZBTB3   | zinc finger and B  | 0.18  | -2.47 | 0.00 | 0.00 |
| 218810_at   | ZC3H12A | zinc finger CCH    | 10.33 | 3.37  | 0.00 | 0.00 |
| 212419_at   | ZCCHC24 | zinc finger, CCH   | 4.46  | 2.16  | 0.00 | 0.00 |
| 221646_s_at | ZDHHC11 | zinc finger, DHH   | 0.07  | -3.85 | 0.00 | 0.00 |
| 219296_at   | ZDHHC13 | zinc finger, DHH   | 0.24  | -2.08 | 0.00 | 0.00 |
| 207757_at   | ZFP2    | zinc finger protei | 0.32  | -1.64 | 0.00 | 0.00 |
| 214678_x_at | ZFX     | zinc finger protei | 0.19  | -2.40 | 0.00 | 0.00 |
| 219929_s_at | ZFYVE21 | zinc finger, FYVI  | 0.21  | -2.24 | 0.00 | 0.00 |
| 214900_at   | ZKSCAN1 | zinc finger with k | 0.30  | -1.73 | 0.00 | 0.00 |
| 206652_at   | ZMYM5   | zinc finger, MYM   | 0.21  | -2.25 | 0.00 | 0.00 |
| 219925_at   | ZMYM6   | zinc finger, MYM   | 0.22  | -2.21 | 0.00 | 0.00 |
| 202137_s_at | ZMYND11 | zinc finger, MYN   | 0.23  | -2.11 | 0.00 | 0.00 |
| 209049_s_at | ZMYND8  | zinc finger, MYN   | 0.27  | -1.90 | 0.00 | 0.00 |

|             |         |                    |        |       |      |      |
|-------------|---------|--------------------|--------|-------|------|------|
| 219571_s_at | ZNF12   | zinc finger protei | 0.28   | -1.86 | 0.00 | 0.00 |
| 206928_at   | ZNF124  | zinc finger protei | 0.33   | -1.60 | 0.02 | 0.03 |
| 203319_s_at | ZNF148  | zinc finger protei | 0.30   | -1.75 | 0.00 | 0.00 |
| 207417_s_at | ZNF177  | zinc finger protei | 0.28   | -1.84 | 0.00 | 0.00 |
| 219495_s_at | ZNF180  | zinc finger protei | 0.31   | -1.68 | 0.00 | 0.00 |
| 213452_at   | ZNF184  | zinc finger protei | 0.29   | -1.80 | 0.00 | 0.00 |
| 214823_at   | ZNF204  | zinc finger protei | 0.12   | -3.03 | 0.00 | 0.00 |
| 216983_s_at | ZNF224  | zinc finger protei | 0.13   | -2.96 | 0.00 | 0.00 |
| 219171_s_at | ZNF236  | zinc finger protei | 0.20   | -2.31 | 0.00 | 0.00 |
| 205917_at   | ZNF264  | zinc finger protei | 0.31   | -1.69 | 0.00 | 0.00 |
| 209989_at   | ZNF268  | zinc finger protei | 0.30   | -1.76 | 0.00 | 0.00 |
| 221213_s_at | ZNF280D | zinc finger protei | 0.31   | -1.67 | 0.00 | 0.00 |
| 212368_at   | ZNF292  | zinc finger protei | 0.20   | -2.35 | 0.00 | 0.00 |
| 222016_s_at | ZNF323  | zinc finger protei | 4.67   | 2.22  | 0.00 | 0.00 |
| 205182_s_at | ZNF324  | zinc finger protei | 3.39   | 1.76  | 0.00 | 0.00 |
| 213760_s_at | ZNF330  | zinc finger protei | 4.17   | 2.06  | 0.00 | 0.00 |
| 206448_at   | ZNF365  | zinc finger protei | 3.22   | 1.69  | 0.00 | 0.00 |
| 215429_s_at | ZNF428  | zinc finger protei | 4.19   | 2.07  | 0.00 | 0.00 |
| 222136_x_at | ZNF43   | zinc finger protei | 0.25   | -2.02 | 0.00 | 0.00 |
| 215892_at   | ZNF440  | zinc finger protei | 0.23   | -2.10 | 0.00 | 0.00 |
| 213124_at   | ZNF473  | zinc finger protei | 4.74   | 2.25  | 0.00 | 0.00 |
| 204291_at   | ZNF518A | zinc finger protei | 0.21   | -2.24 | 0.00 | 0.00 |
| 211721_s_at | ZNF551  | zinc finger protei | 0.19   | -2.42 | 0.00 | 0.00 |
| 217627_at   | ZNF573  | zinc finger protei | 0.14   | -2.84 | 0.00 | 0.00 |
| 205594_at   | ZNF652  | zinc finger protei | 0.15   | -2.71 | 0.00 | 0.00 |
| 219239_s_at | ZNF654  | zinc finger protei | 0.29   | -1.80 | 0.00 | 0.00 |
| 206180_x_at | ZNF747  | zinc finger protei | 5.73   | 2.52  | 0.00 | 0.00 |
| 213659_at   | ZNF75D  | zinc finger protei | 0.28   | -1.83 | 0.00 | 0.00 |
| 219781_s_at | ZNF771  | zinc finger protei | 8.26   | 3.05  | 0.00 | 0.00 |
| 214138_at   | ZNF79   | zinc finger protei | 3.66   | 1.87  | 0.00 | 0.00 |
| 60794_f_at  | ZNF814  | zinc finger protei | 0.33   | -1.59 | 0.00 | 0.00 |
| 219050_s_at | ZNHIT2  | zinc finger, HIT t | 3.37   | 1.75  | 0.00 | 0.00 |
| 217593_at   | ZSCAN18 | zinc finger and S  | 0.28   | -1.86 | 0.00 | 0.00 |
| 214580_x_at |         |                    | 133.48 | 7.06  | 0.00 | 0.00 |
| 210413_x_at |         |                    | 48.64  | 5.60  | 0.00 | 0.00 |
| 215504_x_at |         |                    | 13.33  | 3.74  | 0.00 | 0.00 |
| 216745_x_at |         |                    | 12.42  | 3.64  | 0.00 | 0.00 |
| 208539_x_at |         |                    | 11.00  | 3.46  | 0.00 | 0.00 |
| 218822_s_at |         |                    | 9.06   | 3.18  | 0.00 | 0.00 |
| 217619_x_at |         |                    | 8.37   | 3.06  | 0.00 | 0.00 |
| 222114_x_at |         |                    | 6.28   | 2.65  | 0.00 | 0.00 |
| 214463_x_at |         |                    | 5.96   | 2.58  | 0.00 | 0.00 |
| 216499_at   |         |                    | 5.19   | 2.38  | 0.00 | 0.00 |
| 211691_x_at |         |                    | 5.08   | 2.35  | 0.00 | 0.00 |
| 216474_x_at |         |                    | 4.42   | 2.15  | 0.00 | 0.01 |
| 216535_at   |         |                    | 4.28   | 2.10  | 0.00 | 0.00 |
| 217516_x_at |         |                    | 4.23   | 2.08  | 0.00 | 0.00 |
| 217055_x_at |         |                    | 4.15   | 2.05  | 0.00 | 0.00 |



|             |      |       |      |      |
|-------------|------|-------|------|------|
| 217521_at   | 4.08 | 2.03  | 0.00 | 0.00 |
| 208580_x_at | 3.72 | 1.89  | 0.00 | 0.00 |
| 216043_x_at | 3.64 | 1.87  | 0.00 | 0.00 |
| 215353_at   | 3.63 | 1.86  | 0.00 | 0.00 |
| 216806_at   | 3.62 | 1.86  | 0.00 | 0.00 |
| 215372_x_at | 3.57 | 1.83  | 0.00 | 0.00 |
| 205114_s_at | 3.53 | 1.82  | 0.00 | 0.00 |
| 216694_at   | 3.53 | 1.82  | 0.00 | 0.00 |
| 216371_at   | 3.51 | 1.81  | 0.00 | 0.00 |
| 210474_s_at | 3.49 | 1.80  | 0.00 | 0.00 |
| 216554_s_at | 3.44 | 1.78  | 0.00 | 0.00 |
| 215261_at   | 3.44 | 1.78  | 0.00 | 0.00 |
| 206063_x_at | 3.34 | 1.74  | 0.00 | 0.00 |
| 213690_s_at | 3.29 | 1.72  | 0.00 | 0.00 |
| 215949_x_at | 3.24 | 1.70  | 0.00 | 0.00 |
| 202632_at   | 3.19 | 1.68  | 0.00 | 0.00 |
| 216112_at   | 3.19 | 1.67  | 0.00 | 0.00 |
| 213448_at   | 3.18 | 1.67  | 0.00 | 0.00 |
| 215553_x_at | 3.17 | 1.66  | 0.00 | 0.00 |
| 216138_at   | 3.11 | 1.64  | 0.00 | 0.00 |
| 216152_at   | 3.11 | 1.64  | 0.00 | 0.00 |
| 210070_s_at | 3.10 | 1.63  | 0.00 | 0.00 |
| 216562_at   | 3.08 | 1.62  | 0.00 | 0.00 |
| 205144_at   | 3.07 | 1.62  | 0.00 | 0.00 |
| 221715_at   | 3.07 | 1.62  | 0.00 | 0.00 |
| 215489_x_at | 3.05 | 1.61  | 0.00 | 0.00 |
| 216542_x_at | 3.04 | 1.60  | 0.00 | 0.00 |
| 216473_x_at | 3.03 | 1.60  | 0.00 | 0.00 |
| 222282_at   | 0.33 | -1.59 | 0.00 | 0.00 |
| 212867_at   | 0.33 | -1.60 | 0.00 | 0.00 |
| 213156_at   | 0.33 | -1.60 | 0.00 | 0.00 |
| 206088_at   | 0.33 | -1.61 | 0.00 | 0.00 |
| 217588_at   | 0.33 | -1.60 | 0.00 | 0.00 |
| 215344_at   | 0.33 | -1.61 | 0.00 | 0.00 |
| 215786_at   | 0.33 | -1.62 | 0.00 | 0.00 |
| 216769_x_at | 0.33 | -1.62 | 0.00 | 0.00 |
| 219376_at   | 0.33 | -1.62 | 0.00 | 0.00 |
| 212499_s_at | 0.33 | -1.62 | 0.00 | 0.00 |
| 213686_at   | 0.32 | -1.63 | 0.00 | 0.00 |
| 206194_at   | 0.32 | -1.63 | 0.00 | 0.00 |
| 210491_at   | 0.32 | -1.66 | 0.00 | 0.00 |
| 215029_at   | 0.32 | -1.65 | 0.00 | 0.00 |
| 222111_at   | 0.32 | -1.66 | 0.00 | 0.00 |
| 215626_at   | 0.32 | -1.66 | 0.00 | 0.00 |
| 216069_at   | 0.31 | -1.67 | 0.00 | 0.00 |
| 31799_at    | 0.31 | -1.67 | 0.00 | 0.00 |
| 216783_at   | 0.31 | -1.70 | 0.00 | 0.00 |
| 216142_at   | 0.31 | -1.71 | 0.00 | 0.00 |

|             |      |       |      |      |
|-------------|------|-------|------|------|
| 215388_s_at | 0.30 | -1.74 | 0.01 | 0.03 |
| 215956_at   | 0.30 | -1.76 | 0.00 | 0.00 |
| 213413_at   | 0.30 | -1.76 | 0.00 | 0.01 |
| 215390_at   | 0.29 | -1.77 | 0.00 | 0.00 |
| 217164_at   | 0.29 | -1.79 | 0.00 | 0.00 |
| 215164_at   | 0.29 | -1.80 | 0.00 | 0.00 |
| 214415_at   | 0.28 | -1.82 | 0.00 | 0.00 |
| 214871_x_at | 0.28 | -1.83 | 0.00 | 0.00 |
| 217621_at   | 0.28 | -1.83 | 0.00 | 0.00 |
| 215059_at   | 0.28 | -1.84 | 0.00 | 0.00 |
| 212913_at   | 0.28 | -1.85 | 0.00 | 0.00 |
| 220969_s_at | 0.28 | -1.86 | 0.00 | 0.00 |
| 214807_at   | 0.27 | -1.89 | 0.00 | 0.00 |
| 216214_at   | 0.27 | -1.92 | 0.00 | 0.00 |
| 216527_at   | 0.26 | -1.92 | 0.00 | 0.00 |
| 203852_s_at | 0.26 | -1.93 | 0.00 | 0.00 |
| 222344_at   | 0.26 | -1.93 | 0.00 | 0.00 |
| 222326_at   | 0.26 | -1.95 | 0.00 | 0.00 |
| 217336_at   | 0.26 | -1.96 | 0.00 | 0.00 |
| 222335_at   | 0.26 | -1.96 | 0.00 | 0.00 |
| 208154_at   | 0.26 | -1.97 | 0.00 | 0.00 |
| 215612_at   | 0.26 | -1.97 | 0.00 | 0.00 |
| 217137_x_at | 0.26 | -1.97 | 0.00 | 0.00 |
| 209084_s_at | 0.25 | -1.98 | 0.00 | 0.00 |
| 222341_x_at | 0.25 | -1.99 | 0.00 | 0.00 |
| 215287_at   | 0.25 | -2.00 | 0.00 | 0.00 |
| 221079_s_at | 0.25 | -2.00 | 0.00 | 0.00 |
| 208498_s_at | 0.24 | -2.04 | 0.00 | 0.00 |
| 215133_s_at | 0.24 | -2.06 | 0.00 | 0.00 |
| 214658_at   | 0.24 | -2.08 | 0.00 | 0.00 |
| 217671_at   | 0.23 | -2.09 | 0.00 | 0.00 |
| 220696_at   | 0.23 | -2.10 | 0.00 | 0.00 |
| 217019_at   | 0.23 | -2.12 | 0.00 | 0.00 |
| 216411_s_at | 0.23 | -2.15 | 0.00 | 0.00 |
| 216756_at   | 0.23 | -2.15 | 0.00 | 0.00 |
| 216022_at   | 0.22 | -2.17 | 0.00 | 0.00 |
| 215576_at   | 0.22 | -2.20 | 0.00 | 0.00 |
| 215599_at   | 0.21 | -2.26 | 0.00 | 0.00 |
| 217643_x_at | 0.20 | -2.30 | 0.00 | 0.00 |
| 216006_at   | 0.20 | -2.32 | 0.00 | 0.00 |
| 222368_at   | 0.20 | -2.31 | 0.00 | 0.00 |
| 215172_at   | 0.20 | -2.33 | 0.00 | 0.00 |
| 216278_at   | 0.20 | -2.35 | 0.00 | 0.00 |
| 215083_at   | 0.19 | -2.37 | 0.00 | 0.00 |
| 216173_at   | 0.19 | -2.39 | 0.00 | 0.00 |
| 222366_at   | 0.19 | -2.39 | 0.00 | 0.00 |
| 215212_at   | 0.18 | -2.48 | 0.00 | 0.00 |
| 220855_at   | 0.18 | -2.50 | 0.00 | 0.00 |

|             |      |       |      |      |
|-------------|------|-------|------|------|
| 215629_s_at | 0.18 | -2.50 | 0.00 | 0.00 |
| 215392_at   | 0.17 | -2.57 | 0.00 | 0.00 |
| 217536_x_at | 0.17 | -2.58 | 0.00 | 0.00 |
| 217353_at   | 0.16 | -2.62 | 0.00 | 0.00 |
| 215555_at   | 0.16 | -2.67 | 0.00 | 0.00 |
| 220711_at   | 0.16 | -2.67 | 0.00 | 0.00 |
| 215635_at   | 0.16 | -2.68 | 0.00 | 0.00 |
| 213930_at   | 0.15 | -2.71 | 0.00 | 0.00 |
| 222308_x_at | 0.15 | -2.73 | 0.00 | 0.00 |
| 215385_at   | 0.14 | -2.85 | 0.00 | 0.00 |
| 216614_at   | 0.13 | -2.94 | 0.00 | 0.00 |
| 205728_at   | 0.13 | -2.99 | 0.00 | 0.00 |
| 222316_at   | 0.12 | -3.08 | 0.00 | 0.00 |
| 213158_at   | 0.11 | -3.15 | 0.00 | 0.00 |
| 220038_at   | 0.08 | -3.71 | 0.00 | 0.00 |

**Table S3. SCC in situ vs. normal epidermis (FCH>3.0 and FDR<0.05)**  
1042 up- and 1200 down-regulated probestes

| Probe       | Symbol  | Description         | FCH   | lgFCH | P     | fdr  | fdr  |
|-------------|---------|---------------------|-------|-------|-------|------|------|
| 219574_at   |         | 1-Mar membrane-asso | 0.28  |       | -1.83 | 0.00 | 0.00 |
| 201737_s_at |         | 6-Mar membrane-asso | 0.09  |       | -3.50 | 0.00 | 0.00 |
| 217757_at   | A2M     | alpha-2-macrogli    | 10.04 |       | 3.33  | 0.00 | 0.00 |
| 219488_at   | A4GALT  | alpha 1,4-galact    | 3.37  |       | 1.75  | 0.00 | 0.00 |
| 201511_at   | AAMP    | angio-associat      | 3.19  |       | 1.68  | 0.00 | 0.00 |
| 214829_at   | AASS    | aminoadipate-se     | 0.27  |       | -1.89 | 0.00 | 0.00 |
| 205986_at   | AATK    | apoptosis-assoc     | 3.58  |       | 1.84  | 0.00 | 0.00 |
| 209459_s_at | ABAT    | 4-aminobutyrate     | 0.31  |       | -1.70 | 0.02 | 0.03 |
| 220159_at   | ABCA11P | ATP-binding cas     | 0.19  |       | -2.38 | 0.00 | 0.00 |
| 210082_at   | ABCA4   | ATP-binding cas     | 3.97  |       | 1.99  | 0.00 | 0.00 |
| 213353_at   | ABCA5   | ATP-binding cas     | 0.13  |       | -2.99 | 0.00 | 0.00 |
| 208161_s_at | ABCC3   | ATP-binding cas     | 0.24  |       | -2.04 | 0.00 | 0.00 |
| 203196_at   | ABCC4   | ATP-binding cas     | 0.14  |       | -2.87 | 0.00 | 0.00 |
| 209247_s_at | ABCF2   | ATP-binding cas     | 3.59  |       | 1.84  | 0.00 | 0.00 |
| 207623_at   | ABCF2   | ATP-binding cas     | 0.19  |       | -2.41 | 0.00 | 0.00 |
| 205566_at   | ABHD2   | abhydrolase don     | 3.87  |       | 1.95  | 0.00 | 0.00 |
| 221679_s_at | ABHD6   | abhydrolase don     | 0.29  |       | -1.80 | 0.00 | 0.00 |
| 209856_x_at | ABI2    | abl-interactor 2    | 3.05  |       | 1.61  | 0.00 | 0.00 |
| 202025_x_at | ACAA1   | acetyl-Coenzym      | 4.03  |       | 2.01  | 0.00 | 0.00 |
| 221928_at   | ACACB   | acetyl-Coenzym      | 0.33  |       | -1.59 | 0.00 | 0.00 |
| 43427_at    | ACACB   | acetyl-Coenzym      | 0.27  |       | -1.88 | 0.00 | 0.00 |
| 49452_at    | ACACB   | acetyl-Coenzym      | 0.20  |       | -2.34 | 0.00 | 0.00 |
| 206069_s_at | ACADL   | acyl-Coenzyme ,     | 0.17  |       | -2.58 | 0.00 | 0.00 |
| 206068_s_at | ACADL   | acyl-Coenzyme ,     | 0.04  |       | -4.64 | 0.00 | 0.00 |
| 205355_at   | ACADSB  | acyl-Coenzyme ,     | 0.23  |       | -2.15 | 0.00 | 0.00 |
| 212476_at   | ACAP2   | ArfGAP with coil    | 0.29  |       | -1.79 | 0.00 | 0.00 |
| 202323_s_at | ACBD3   | acyl-Coenzyme ,     | 0.21  |       | -2.23 | 0.00 | 0.00 |
| 210337_s_at | ACLY    | ATP citrate lyase   | 4.71  |       | 2.23  | 0.00 | 0.00 |
| 200793_s_at | ACO2    | aconitase 2, mitc   | 3.25  |       | 1.70  | 0.00 | 0.00 |
| 214763_at   | ACOT11  | acyl-CoA thioest    | 7.60  |       | 2.93  | 0.00 | 0.00 |
| 215227_x_at | ACP1    | acid phosphatas     | 3.27  |       | 1.71  | 0.00 | 0.00 |
| 201661_s_at | ACSL3   | acyl-CoA synthe     | 0.21  |       | -2.27 | 0.00 | 0.00 |
| 202422_s_at | ACSL4   | acyl-CoA synthe     | 0.20  |       | -2.30 | 0.00 | 0.00 |
| 208636_at   | ACTN1   | actinin, alpha 1    | 8.31  |       | 3.05  | 0.00 | 0.00 |
| 208637_x_at | ACTN1   | actinin, alpha 1    | 7.00  |       | 2.81  | 0.00 | 0.00 |
| 211160_x_at | ACTN1   | actinin, alpha 1    | 5.53  |       | 2.47  | 0.00 | 0.00 |
| 205209_at   | ACVR1B  | activin A recepto   | 0.22  |       | -2.18 | 0.00 | 0.00 |
| 202604_x_at | ADAM10  | ADAM metallope      | 3.59  |       | 1.85  | 0.00 | 0.00 |
| 206046_at   | ADAM23  | ADAM metallope      | 10.32 |       | 3.37  | 0.00 | 0.00 |
| 205997_at   | ADAM28  | ADAM metallope      | 0.33  |       | -1.61 | 0.00 | 0.00 |
| 208268_at   | ADAM28  | ADAM metallope      | 0.28  |       | -1.86 | 0.00 | 0.00 |

|             |          |                    |       |       |      |      |
|-------------|----------|--------------------|-------|-------|------|------|
| 220208_at   | ADAMTS13 | ADAM metallope     | 4.00  | 2.00  | 0.00 | 0.00 |
| 90265_at    | ADAP1    | ArfGAP with dua    | 3.48  | 1.80  | 0.00 | 0.00 |
| 204498_s_at | ADCY9    | adenylate cyclas   | 4.14  | 2.05  | 0.00 | 0.00 |
| 201034_at   | ADD3     | adducin 3 (gamn    | 0.20  | -2.36 | 0.00 | 0.00 |
| 201753_s_at | ADD3     | adducin 3 (gamn    | 0.18  | -2.49 | 0.00 | 0.00 |
| 201752_s_at | ADD3     | adducin 3 (gamn    | 0.11  | -3.20 | 0.00 | 0.00 |
| 205882_x_at | ADD3     | adducin 3 (gamn    | 0.10  | -3.27 | 0.00 | 0.00 |
| 209614_at   | ADH1B    | alcohol dehydroç   | 0.31  | -1.68 | 0.00 | 0.00 |
| 204120_s_at | ADK      | adenosine kinas    | 0.26  | -1.92 | 0.00 | 0.00 |
| 220538_at   | ADM2     | adrenomedullin :   | 4.52  | 2.18  | 0.00 | 0.00 |
| 206170_at   | ADRB2    | adrenergic, beta   | 0.30  | -1.75 | 0.00 | 0.00 |
| 38447_at    | ADRBK1   | adrenergic, beta   | 10.06 | 3.33  | 0.00 | 0.00 |
| 201402_at   | ADRBK1   | adrenergic, beta   | 8.63  | 3.11  | 0.00 | 0.00 |
| 201792_at   | AEBP1    | AE binding prote   | 3.83  | 1.94  | 0.00 | 0.00 |
| 201924_at   | AFF1     | AF4/FMR2 famil     | 0.28  | -1.84 | 0.00 | 0.00 |
| 210710_at   | AGGF1    | angiogenic facto   | 3.46  | 1.79  | 0.00 | 0.00 |
| 208042_at   | AGGF1    | angiogenic facto   | 0.26  | -1.96 | 0.00 | 0.00 |
| 200903_s_at | AHCY     | adenosylhomocy     | 4.01  | 2.00  | 0.00 | 0.00 |
| 220016_at   | AHNAK    | AHNAK nucleop      | 0.23  | -2.11 | 0.00 | 0.00 |
| 222024_s_at | AKAP13   | A kinase (PRKA,    | 0.28  | -1.83 | 0.00 | 0.00 |
| 205771_s_at | AKAP7    | A kinase (PRKA,    | 0.22  | -2.21 | 0.00 | 0.00 |
| 215741_x_at | AKAP8L   | A kinase (PRKA,    | 4.44  | 2.15  | 0.00 | 0.00 |
| 215483_at   | AKAP9    | A kinase (PRKA,    | 0.17  | -2.59 | 0.00 | 0.00 |
| 206561_s_at | AKR1B10  | aldo-keto reduct:  | 11.41 | 3.51  | 0.00 | 0.00 |
| 201951_at   | ALCAM    | activated leukoc   | 0.12  | -3.03 | 0.00 | 0.00 |
| 202054_s_at | ALDH3A2  | aldehyde dehydr    | 0.31  | -1.70 | 0.00 | 0.00 |
| 211552_s_at | ALDH4A1  | aldehyde dehydr    | 5.28  | 2.40  | 0.00 | 0.00 |
| 213591_at   | ALDH7A1  | aldehyde dehydr    | 0.32  | -1.64 | 0.00 | 0.00 |
| 218444_at   | ALG12    | asparagine-linke   | 3.48  | 1.80  | 0.00 | 0.00 |
| 205583_s_at | ALG13    | asparagine-linke   | 0.32  | -1.67 | 0.00 | 0.00 |
| 205584_at   | ALG13    | asparagine-linke   | 0.24  | -2.07 | 0.00 | 0.00 |
| 214707_x_at | ALMS1    | Alstrom syndrorr   | 0.31  | -1.69 | 0.00 | 0.00 |
| 204446_s_at | ALOX5    | arachidonate 5-li  | 0.23  | -2.15 | 0.00 | 0.00 |
| 222383_s_at | ALOXE3   | arachidonate lipc  | 0.22  | -2.19 | 0.00 | 0.00 |
| 202204_s_at | AMFR     | autocrine motility | 6.20  | 2.63  | 0.00 | 0.00 |
| 222108_at   | AMIGO2   | adhesion molecu    | 6.21  | 2.64  | 0.00 | 0.00 |
| 203002_at   | AMOTL2   | angiomotin like 2  | 0.23  | -2.14 | 0.00 | 0.00 |
| 218555_at   | ANAPC2   | anaphase promc     | 0.28  | -1.85 | 0.00 | 0.00 |
| 205141_at   | ANG      | angiogenin, ribor  | 0.17  | -2.57 | 0.00 | 0.00 |
| 221826_at   | ANGEL2   | angel homolog 2    | 0.29  | -1.81 | 0.00 | 0.00 |
| 221009_s_at | ANGPTL4  | angiopoietin-like  | 4.00  | 2.00  | 0.00 | 0.00 |
| 220076_at   | ANKH     | ankylosis, progre  | 0.31  | -1.68 | 0.00 | 0.00 |
| 218769_s_at | ANKRA2   | ankyrin repeat, fi | 0.28  | -1.85 | 0.00 | 0.00 |
| 218093_s_at | ANKRD10  | ankyrin repeat di  | 0.21  | -2.27 | 0.00 | 0.00 |
| 216550_x_at | ANKRD12  | ankyrin repeat di  | 0.24  | -2.04 | 0.00 | 0.00 |
| 214723_x_at | ANKRD36  | ankyrin repeat di  | 0.08  | -3.62 | 0.00 | 0.00 |
| 220940_at   | ANKRD36B | ankyrin repeat di  | 0.24  | -2.07 | 0.00 | 0.00 |
| 212731_at   | ANKRD46  | ankyrin repeat di  | 0.26  | -1.95 | 0.00 | 0.00 |

|             |          |                    |       |       |      |      |
|-------------|----------|--------------------|-------|-------|------|------|
| 218804_at   | ANO1     | anoctamin 1, cal   | 0.13  | -2.91 | 0.00 | 0.00 |
| 209369_at   | ANXA3    | annexin A3         | 7.83  | 2.97  | 0.00 | 0.00 |
| 218261_at   | AP1M2    | adaptor-related f  | 3.22  | 1.69  | 0.00 | 0.00 |
| 200615_s_at | AP2B1    | adaptor-related f  | 5.74  | 2.52  | 0.00 | 0.00 |
| 200613_at   | AP2M1    | adaptor-related f  | 3.43  | 1.78  | 0.00 | 0.00 |
| 204859_s_at | APAF1    | apoptotic peptid   | 0.30  | -1.75 | 0.00 | 0.00 |
| 209870_s_at | APBA2    | amyloid beta (A4   | 4.50  | 2.17  | 0.00 | 0.00 |
| 214960_at   | API5     | apoptosis inhibi   | 3.01  | 1.59  | 0.01 | 0.01 |
| 211404_s_at | APLP2    | amyloid beta (A4   | 4.54  | 2.18  | 0.00 | 0.00 |
| 208702_x_at | APLP2    | amyloid beta (A4   | 3.07  | 1.62  | 0.00 | 0.00 |
| 210873_x_at | APOBEC3A | apolipoprotein B   | 7.43  | 2.89  | 0.00 | 0.00 |
| 215579_at   | APOBEC3G | apolipoprotein B   | 3.83  | 1.94  | 0.00 | 0.00 |
| 212884_x_at | APOE     | apolipoprotein E   | 0.30  | -1.76 | 0.00 | 0.00 |
| 203381_s_at | APOE     | apolipoprotein E   | 0.28  | -1.85 | 0.00 | 0.00 |
| 203382_s_at | APOE     | apolipoprotein E   | 0.21  | -2.23 | 0.00 | 0.00 |
| 209546_s_at | APOL1    | apolipoprotein L   | 3.09  | 1.63  | 0.00 | 0.00 |
| 219716_at   | APOL6    | apolipoprotein L   | 5.74  | 2.52  | 0.00 | 0.00 |
| 221620_s_at | APOO     | apolipoprotein O   | 3.80  | 1.93  | 0.00 | 0.00 |
| 214953_s_at | APP      | amyloid beta (A4   | 3.54  | 1.82  | 0.00 | 0.00 |
| 218218_at   | APPL2    | adaptor protein,   | 0.15  | -2.75 | 0.00 | 0.00 |
| 214102_at   | ARAP2    | ArfGAP with Rho    | 0.32  | -1.64 | 0.00 | 0.00 |
| 205239_at   | AREG     | amphiregulin       | 12.19 | 3.61  | 0.00 | 0.00 |
| 202955_s_at | ARFGEF1  | ADP-ribosylation   | 3.79  | 1.92  | 0.00 | 0.00 |
| 218098_at   | ARFGEF2  | ADP-ribosylation   | 0.33  | -1.61 | 0.00 | 0.00 |
| 203946_s_at | ARG2     | arginase, type II  | 3.22  | 1.69  | 0.01 | 0.01 |
| 218067_s_at | ARGLU1   | arginine and glut  | 0.22  | -2.20 | 0.00 | 0.00 |
| 207606_s_at | ARHGAP12 | Rho GTPase act     | 0.33  | -1.60 | 0.00 | 0.00 |
| 206298_at   | ARHGAP22 | Rho GTPase act     | 4.06  | 2.02  | 0.00 | 0.00 |
| 204882_at   | ARHGAP25 | Rho GTPase act     | 3.45  | 1.79  | 0.00 | 0.00 |
| 217936_at   | ARHGAP5  | Rho GTPase act     | 0.32  | -1.64 | 0.00 | 0.00 |
| 201333_s_at | ARHGEF12 | Rho guanine nuc    | 3.69  | 1.89  | 0.00 | 0.00 |
| 201335_s_at | ARHGEF12 | Rho guanine nuc    | 0.31  | -1.70 | 0.00 | 0.00 |
| 218964_at   | ARID3B   | AT rich interactiv | 3.78  | 1.92  | 0.00 | 0.00 |
| 221230_s_at | ARID4B   | AT rich interactiv | 0.31  | -1.70 | 0.00 | 0.00 |
| 201228_s_at | ARIH2    | ariadne homolog    | 3.09  | 1.63  | 0.00 | 0.00 |
| 220468_at   | ARL14    | ADP-ribosylation   | 3.05  | 1.61  | 0.01 | 0.01 |
| 202092_s_at | ARL2BP   | ADP-ribosylation   | 3.85  | 1.95  | 0.00 | 0.00 |
| 219094_at   | ARMC8    | armadillo repeat   | 0.33  | -1.59 | 0.00 | 0.00 |
| 218694_at   | ARMCX1   | armadillo repeat   | 0.26  | -1.97 | 0.00 | 0.00 |
| 217858_s_at | ARMCX3   | armadillo repeat   | 0.26  | -1.94 | 0.00 | 0.00 |
| 210971_s_at | ARNTL    | aryl hydrocarbon   | 0.23  | -2.12 | 0.00 | 0.00 |
| 220658_s_at | ARNTL2   | aryl hydrocarbon   | 4.69  | 2.23  | 0.00 | 0.00 |
| 201954_at   | ARPC1B   | actin related pro  | 6.34  | 2.66  | 0.00 | 0.00 |
| 217818_s_at | ARPC4    | actin related pro  | 3.22  | 1.69  | 0.00 | 0.00 |
| 205784_x_at | ARVCF    | armadillo repeat   | 3.11  | 1.64  | 0.00 | 0.00 |
| 203427_at   | ASF1A    | ASF1 anti-silenc   | 0.17  | -2.54 | 0.00 | 0.00 |
| 218115_at   | ASF1B    | ASF1 anti-silenc   | 3.66  | 1.87  | 0.00 | 0.00 |
| 209517_s_at | ASH2L    | ash2 (absent, sn   | 3.14  | 1.65  | 0.00 | 0.00 |

|             |          |                   |      |       |      |      |
|-------------|----------|-------------------|------|-------|------|------|
| 206030_at   | ASPA     | aspartoacylase (  | 0.22 | -2.19 | 0.00 | 0.00 |
| 209135_at   | ASPH     | aspartate beta-h  | 0.25 | -1.99 | 0.00 | 0.00 |
| 219087_at   | ASPN     | asporin           | 0.14 | -2.86 | 0.00 | 0.00 |
| 213387_at   | ATAD2B   | ATPase family, /  | 0.32 | -1.65 | 0.00 | 0.00 |
| 219068_x_at | ATAD3A   | ATPase family, /  | 3.87 | 1.95  | 0.00 | 0.00 |
| 203168_at   | ATF6B    | activating transc | 3.45 | 1.79  | 0.00 | 0.00 |
| 216197_at   | ATF7IP   | activating transc | 0.32 | -1.65 | 0.00 | 0.00 |
| 204833_at   | ATG12    | ATG12 autophag    | 3.03 | 1.60  | 0.00 | 0.00 |
| 219164_s_at | ATG2B    | ATG2 autophagy    | 0.25 | -1.98 | 0.00 | 0.00 |
| 40489_at    | ATN1     | atrophin 1        | 6.42 | 2.68  | 0.00 | 0.00 |
| 203454_s_at | ATOX1    | ATX1 antioxidant  | 4.00 | 2.00  | 0.00 | 0.00 |
| 214070_s_at | ATP10B   | ATPase, class V   | 3.12 | 1.64  | 0.00 | 0.00 |
| 213582_at   | ATP11A   | ATPase, class V   | 0.16 | -2.61 | 0.00 | 0.00 |
| 207367_at   | ATP12A   | ATPase, H+/K+ i   | 7.63 | 2.93  | 0.00 | 0.00 |
| 212297_at   | ATP13A3  | ATPase type 13/   | 0.33 | -1.59 | 0.00 | 0.00 |
| 215716_s_at | ATP2B1   | ATPase, Ca++ tr   | 0.24 | -2.06 | 0.00 | 0.00 |
| 212930_at   | ATP2B1   | ATPase, Ca++ tr   | 0.14 | -2.86 | 0.00 | 0.00 |
| 212041_at   | ATP6V0D1 | ATPase, H+ tran   | 3.02 | 1.60  | 0.00 | 0.00 |
| 200096_s_at | ATP6V0E1 | ATPase, H+ tran   | 3.25 | 1.70  | 0.00 | 0.00 |
| 205198_s_at | ATP7A    | ATPase, Cu++ tr   | 0.30 | -1.76 | 0.00 | 0.00 |
| 213106_at   | ATP8A1   | ATPase, aminop    | 0.08 | -3.65 | 0.00 | 0.00 |
| 212062_at   | ATP9A    | ATPase, class II  | 3.18 | 1.67  | 0.00 | 0.00 |
| 214010_s_at | ATP9B    | ATPase, class II  | 3.46 | 1.79  | 0.00 | 0.00 |
| 204516_at   | ATXN7    | ataxin 7          | 0.24 | -2.07 | 0.00 | 0.00 |
| 209964_s_at | ATXN7    | ataxin 7          | 0.23 | -2.14 | 0.00 | 0.00 |
| 205539_at   | AVIL     | advillin          | 0.21 | -2.29 | 0.00 | 0.00 |
| 208260_at   | AVPR1B   | arginine vasopre  | 7.92 | 2.99  | 0.00 | 0.00 |
| 209309_at   | AZGP1    | alpha-2-glycoprc  | 0.18 | -2.47 | 0.00 | 0.01 |
| 204856_at   | B3GNT3   | UDP-GlcNAc:be     | 3.57 | 1.84  | 0.00 | 0.00 |
| 221484_at   | B4GALT5  | UDP-Gal:betaGl    | 3.69 | 1.88  | 0.00 | 0.00 |
| 209364_at   | BAD      | BCL2-associated   | 3.11 | 1.64  | 0.00 | 0.00 |
| 202984_s_at | BAG5     | BCL2-associated   | 0.22 | -2.19 | 0.00 | 0.00 |
| 205294_at   | BAIAP2   | BAI1-associated   | 0.28 | -1.85 | 0.00 | 0.00 |
| 205345_at   | BARD1    | BRCA1 associat    | 0.21 | -2.24 | 0.00 | 0.00 |
| 202391_at   | BASP1    | brain abundant, i | 4.45 | 2.15  | 0.00 | 0.00 |
| 200041_s_at | BAT1     | HLA-B associate   | 0.28 | -1.83 | 0.00 | 0.00 |
| 212384_at   | BAT1     | HLA-B associate   | 0.24 | -2.07 | 0.00 | 0.00 |
| 201355_s_at | BAZ2A    | bromodomain ac    | 3.11 | 1.64  | 0.00 | 0.00 |
| 219487_at   | BBS10    | Bardet-Biedl syn  | 0.33 | -1.61 | 0.00 | 0.00 |
| 209958_s_at | BBS9     | Bardet-Biedl syn  | 3.73 | 1.90  | 0.00 | 0.00 |
| 91920_at    | BCAN     | brevican          | 6.15 | 2.62  | 0.00 | 0.00 |
| 204032_at   | BCAR3    | breast cancer an  | 0.26 | -1.94 | 0.00 | 0.00 |
| 203685_at   | BCL2     | B-cell CLL/lymph  | 0.29 | -1.78 | 0.00 | 0.00 |
| 215990_s_at | BCL6     | B-cell CLL/lymph  | 0.15 | -2.75 | 0.00 | 0.00 |
| 204129_at   | BCL9     | B-cell CLL/lymph  | 3.57 | 1.83  | 0.00 | 0.00 |
| 217223_s_at | BCR      | breakpoint cluste | 4.46 | 2.16  | 0.00 | 0.00 |
| 202315_s_at | BCR      | breakpoint cluste | 3.63 | 1.86  | 0.00 | 0.00 |
| 211725_s_at | BID      | BH3 interacting c | 3.73 | 1.90  | 0.00 | 0.00 |

|             |           |                    |       |       |      |      |
|-------------|-----------|--------------------|-------|-------|------|------|
| 204493_at   | BID       | BH3 interacting c  | 3.01  | 1.59  | 0.00 | 0.00 |
| 214439_x_at | BIN1      | bridging integrati | 6.90  | 2.79  | 0.00 | 0.00 |
| 202931_x_at | BIN1      | bridging integrati | 4.45  | 2.15  | 0.00 | 0.00 |
| 219191_s_at | BIN2      | bridging integrati | 4.50  | 2.17  | 0.00 | 0.00 |
| 210538_s_at | BIRC3     | baculoviral IAP r  | 0.21  | -2.25 | 0.00 | 0.00 |
| 210334_x_at | BIRC5     | baculoviral IAP r  | 3.27  | 1.71  | 0.00 | 0.00 |
| 206725_x_at | BMP1      | bone morphoger     | 3.81  | 1.93  | 0.00 | 0.00 |
| 205290_s_at | BMP2      | bone morphoger     | 0.33  | -1.62 | 0.01 | 0.02 |
| 205289_at   | BMP2      | bone morphoger     | 0.16  | -2.69 | 0.00 | 0.00 |
| 220203_at   | BMP8A     | bone morphoger     | 8.46  | 3.08  | 0.00 | 0.00 |
| 201848_s_at | BNIP3     | BCL2/adenoviru:    | 3.32  | 1.73  | 0.00 | 0.00 |
| 206044_s_at | BRAF      | v-raf murine sarc  | 4.46  | 2.16  | 0.00 | 0.00 |
| 204520_x_at | BRD1      | bromodomain cc     | 0.29  | -1.80 | 0.00 | 0.00 |
| 215460_x_at | BRD1      | bromodomain cc     | 0.27  | -1.91 | 0.00 | 0.00 |
| 205550_s_at | BRE       | brain and reprod   | 3.36  | 1.75  | 0.00 | 0.00 |
| 219280_at   | BRWD1     | bromodomain ar     | 0.31  | -1.71 | 0.00 | 0.00 |
| 218090_s_at | BRWD2     | bromodomain ar     | 0.26  | -1.93 | 0.00 | 0.00 |
| 201641_at   | BST2      | bone marrow str    | 12.12 | 3.60  | 0.00 | 0.00 |
| 209430_at   | BTAF1     | BTAF1 RNA poly     | 0.25  | -2.02 | 0.00 | 0.00 |
| 207326_at   | BTC       | betacellulin       | 0.04  | -4.57 | 0.00 | 0.00 |
| 215425_at   | BTG3      | BTG family, men    | 0.31  | -1.70 | 0.00 | 0.00 |
| 38241_at    | BTN3A3    | butyrophilin, sub  | 0.23  | -2.13 | 0.00 | 0.00 |
| 204901_at   | BTRC      | beta-transducin i  | 4.15  | 2.05  | 0.00 | 0.00 |
| 218299_at   | C11orf24  | chromosome 11      | 6.58  | 2.72  | 0.00 | 0.00 |
| 52164_at    | C11orf24  | chromosome 11      | 3.33  | 1.74  | 0.00 | 0.00 |
| 204218_at   | C11orf51  | chromosome 11      | 4.57  | 2.19  | 0.00 | 0.00 |
| 221208_s_at | C11orf61  | chromosome 11      | 0.17  | -2.60 | 0.00 | 0.00 |
| 220141_at   | C11orf63  | chromosome 11      | 0.23  | -2.13 | 0.00 | 0.00 |
| 221599_at   | C11orf67  | chromosome 11      | 0.28  | -1.86 | 0.00 | 0.00 |
| 64432_at    | C12orf47  | chromosome 12      | 0.13  | -2.99 | 0.00 | 0.00 |
| 218867_s_at | C12orf49  | chromosome 12      | 3.75  | 1.91  | 0.00 | 0.00 |
| 219099_at   | C12orf5   | chromosome 12      | 4.59  | 2.20  | 0.00 | 0.00 |
| 221777_at   | C12orf52  | chromosome 12      | 3.65  | 1.87  | 0.00 | 0.00 |
| 219166_at   | C14orf104 | chromosome 14      | 0.30  | -1.75 | 0.00 | 0.00 |
| 206500_s_at | C14orf106 | chromosome 14      | 0.18  | -2.50 | 0.00 | 0.00 |
| 218820_at   | C14orf132 | chromosome 14      | 0.31  | -1.71 | 0.00 | 0.00 |
| 218791_s_at | C15orf29  | chromosome 15      | 0.32  | -1.65 | 0.00 | 0.00 |
| 208109_s_at | C15orf5   | chromosome 15      | 0.26  | -1.93 | 0.00 | 0.00 |
| 219556_at   | C16orf59  | chromosome 16      | 4.49  | 2.17  | 0.00 | 0.00 |
| 203830_at   | C17orf75  | chromosome 17      | 0.26  | -1.94 | 0.00 | 0.00 |
| 217539_at   | C18orf25  | chromosome 18      | 0.29  | -1.79 | 0.00 | 0.00 |
| 222266_at   | C19orf2   | chromosome 19      | 0.25  | -1.98 | 0.00 | 0.00 |
| 212925_at   | C19orf21  | chromosome 19      | 7.58  | 2.92  | 0.00 | 0.00 |
| 55705_at    | C19orf22  | chromosome 19      | 3.72  | 1.89  | 0.00 | 0.00 |
| 200076_s_at | C19orf50  | chromosome 19      | 3.20  | 1.68  | 0.00 | 0.00 |
| 206901_at   | C19orf57  | chromosome 19      | 4.24  | 2.09  | 0.00 | 0.00 |
| 218429_s_at | C19orf66  | chromosome 19      | 3.06  | 1.61  | 0.00 | 0.00 |
| 219856_at   | C1orf116  | chromosome 1 c     | 3.21  | 1.68  | 0.00 | 0.00 |



|             |          |                   |       |       |      |      |
|-------------|----------|-------------------|-------|-------|------|------|
| 212003_at   | C1orf144 | chromosome 1 c    | 4.87  | 2.29  | 0.00 | 0.00 |
| 212004_at   | C1orf144 | chromosome 1 c    | 3.85  | 1.95  | 0.00 | 0.00 |
| 210711_at   | C1orf217 | chromosome 1 c    | 0.19  | -2.40 | 0.00 | 0.00 |
| 220992_s_at | C1orf25  | chromosome 1 c    | 0.30  | -1.74 | 0.00 | 0.00 |
| 209006_s_at | C1orf63  | chromosome 1 c    | 0.22  | -2.18 | 0.00 | 0.00 |
| 202953_at   | C1QB     | complement con    | 3.09  | 1.63  | 0.00 | 0.00 |
| 212067_s_at | C1R      | complement con    | 7.07  | 2.82  | 0.00 | 0.00 |
| 218983_at   | C1RL     | complement con    | 0.21  | -2.26 | 0.00 | 0.00 |
| 208747_s_at | C1S      | complement con    | 7.88  | 2.98  | 0.00 | 0.00 |
| 219961_s_at | C20orf19 | chromosome 20     | 3.73  | 1.90  | 0.00 | 0.00 |
| 221211_s_at | C21orf7  | chromosome 21     | 0.29  | -1.78 | 0.00 | 0.00 |
| 220681_at   | C22orf26 | chromosome 22     | 3.50  | 1.81  | 0.00 | 0.00 |
| 219560_at   | C22orf29 | chromosome 22     | 4.22  | 2.08  | 0.00 | 0.00 |
| 220149_at   | C2orf54  | chromosome 2 c    | 0.16  | -2.66 | 0.00 | 0.00 |
| 220943_s_at | C2orf56  | chromosome 2 c    | 0.24  | -2.08 | 0.00 | 0.00 |
| 215046_at   | C2orf67  | chromosome 2 c    | 0.17  | -2.55 | 0.00 | 0.00 |
| 65472_at    | C2orf68  | chromosome 2 c    | 0.31  | -1.68 | 0.00 | 0.00 |
| 209906_at   | C3AR1    | complement con    | 3.06  | 1.61  | 0.00 | 0.00 |
| 219474_at   | C3orf52  | chromosome 3 c    | 0.31  | -1.68 | 0.00 | 0.00 |
| 219023_at   | C4orf16  | chromosome 4 c    | 0.18  | -2.46 | 0.00 | 0.00 |
| 218513_at   | C4orf43  | chromosome 4 c    | 0.17  | -2.56 | 0.00 | 0.00 |
| 205500_at   | C5       | complement con    | 0.16  | -2.64 | 0.00 | 0.00 |
| 201310_s_at | C5orf13  | chromosome 5 c    | 4.53  | 2.18  | 0.00 | 0.00 |
| 221823_at   | C5orf30  | chromosome 5 c    | 0.28  | -1.86 | 0.00 | 0.00 |
| 48030_i_at  | C5orf4   | chromosome 5 c    | 12.89 | 3.69  | 0.00 | 0.00 |
| 218674_at   | C5orf44  | chromosome 5 c    | 0.30  | -1.75 | 0.00 | 0.00 |
| 217924_at   | C6orf106 | chromosome 6 c    | 4.58  | 2.20  | 0.00 | 0.00 |
| 210409_at   | C6orf124 | chromosome 6 c    | 0.32  | -1.64 | 0.00 | 0.00 |
| 221100_at   | C6orf15  | chromosome 6 c    | 3.18  | 1.67  | 0.00 | 0.00 |
| 218195_at   | C6orf211 | chromosome 6 c    | 0.25  | -2.00 | 0.00 | 0.00 |
| 220755_s_at | C6orf48  | chromosome 6 c    | 3.82  | 1.93  | 0.00 | 0.00 |
| 215024_at   | C7orf28B | chromosome 7 c    | 0.23  | -2.11 | 0.00 | 0.00 |
| 206497_at   | C7orf44  | chromosome 7 c    | 0.30  | -1.73 | 0.00 | 0.00 |
| 209446_s_at | C7orf44  | chromosome 7 c    | 0.28  | -1.84 | 0.00 | 0.00 |
| 220949_s_at | C7orf49  | chromosome 7 c    | 3.20  | 1.68  | 0.00 | 0.00 |
| 221596_s_at | C7orf64  | chromosome 7 c    | 0.20  | -2.33 | 0.00 | 0.00 |
| 221629_x_at | C8orf30A | chromosome 8 c    | 3.77  | 1.92  | 0.00 | 0.00 |
| 204865_at   | CA3      | carbonic anhydr   | 0.21  | -2.28 | 0.00 | 0.00 |
| 211592_s_at | CACNA1C  | calcium channel,  | 0.26  | -1.93 | 0.00 | 0.00 |
| 211802_x_at | CACNA1G  | calcium channel,  | 4.24  | 2.08  | 0.00 | 0.00 |
| 207869_s_at | CACNA1G  | calcium channel,  | 0.32  | -1.66 | 0.00 | 0.00 |
| 209530_at   | CACNB3   | calcium channel,  | 3.03  | 1.60  | 0.00 | 0.00 |
| 62987_r_at  | CACNG4   | calcium channel,  | 23.85 | 4.58  | 0.00 | 0.00 |
| 209031_at   | CADM1    | cell adhesion mc  | 0.19  | -2.37 | 0.00 | 0.00 |
| 200622_x_at | CALM3    | calmodulin 3 (ph  | 4.55  | 2.19  | 0.00 | 0.00 |
| 210020_x_at | CALML3   | calmodulin-like 3 | 4.06  | 2.02  | 0.00 | 0.00 |
| 64408_s_at  | CALML4   | calmodulin-like 4 | 0.27  | -1.90 | 0.00 | 0.00 |
| 200757_s_at | CALU     | calumenin         | 5.23  | 2.39  | 0.00 | 0.00 |

|             |         |                     |       |       |      |      |
|-------------|---------|---------------------|-------|-------|------|------|
| 200755_s_at | CALU    | calumenin           | 3.81  | 1.93  | 0.00 | 0.00 |
| 34846_at    | CAMK2B  | calcium/calmodu     | 3.80  | 1.93  | 0.00 | 0.00 |
| 208683_at   | CAPN2   | calpain 2, (m/II) I | 5.85  | 2.55  | 0.00 | 0.00 |
| 200001_at   | CAPNS1  | calpain, small su   | 6.20  | 2.63  | 0.00 | 0.00 |
| 204950_at   | CARD8   | caspase recruitr    | 0.28  | -1.82 | 0.00 | 0.00 |
| 218384_at   | CARHSP1 | calcium regulate    | 4.65  | 2.22  | 0.00 | 0.00 |
| 61297_at    | CASKIN2 | CASK interactinç    | 0.28  | -1.85 | 0.00 | 0.00 |
| 215573_at   | CAT     | catalase            | 0.31  | -1.67 | 0.00 | 0.00 |
| 208204_s_at | CAV3    | caveolin 3          | 3.35  | 1.75  | 0.00 | 0.00 |
| 213626_at   | CBR4    | carbonyl reducta    | 0.17  | -2.55 | 0.00 | 0.00 |
| 219611_s_at | CCDC21  | coiled-coil doma    | 3.29  | 1.72  | 0.00 | 0.00 |
| 219644_at   | CCDC41  | coiled-coil doma    | 0.18  | -2.50 | 0.00 | 0.00 |
| 218175_at   | CCDC92  | coiled-coil doma    | 4.20  | 2.07  | 0.00 | 0.00 |
| 209689_at   | CCDC93  | coiled-coil doma    | 0.26  | -1.94 | 0.00 | 0.00 |
| 205476_at   | CCL20   | chemokine (C-C      | 6.79  | 2.76  | 0.00 | 0.00 |
| 204606_at   | CCL21   | chemokine (C-C      | 0.32  | -1.65 | 0.01 | 0.03 |
| 207955_at   | CCL27   | chemokine (C-C      | 0.02  | -5.60 | 0.00 | 0.00 |
| 208712_at   | CCND1   | cyclin D1           | 0.20  | -2.31 | 0.00 | 0.00 |
| 208711_s_at | CCND1   | cyclin D1           | 0.16  | -2.67 | 0.00 | 0.00 |
| 200951_s_at | CCND2   | cyclin D2           | 4.30  | 2.10  | 0.00 | 0.00 |
| 204645_at   | CCNT2   | cyclin T2           | 0.27  | -1.91 | 0.00 | 0.00 |
| 222156_x_at | CCPG1   | cell cycle progre   | 0.25  | -1.98 | 0.00 | 0.00 |
| 221156_x_at | CCPG1   | cell cycle progre   | 0.23  | -2.10 | 0.00 | 0.00 |
| 206983_at   | CCR6    | chemokine (C-C      | 0.31  | -1.71 | 0.00 | 0.00 |
| 201743_at   | CD14    | CD14 molecule       | 4.28  | 2.10  | 0.00 | 0.00 |
| 204306_s_at | CD151   | CD151 molecule      | 3.29  | 1.72  | 0.00 | 0.00 |
| 208653_s_at | CD164   | CD164 molecule      | 6.06  | 2.60  | 0.00 | 0.00 |
| 219669_at   | CD177   | CD177 molecule      | 5.14  | 2.36  | 0.00 | 0.00 |
| 220428_at   | CD207   | CD207 molecule      | 0.21  | -2.23 | 0.00 | 0.00 |
| 209772_s_at | CD24    | CD24 molecule       | 15.63 | 3.97  | 0.00 | 0.00 |
| 209771_x_at | CD24    | CD24 molecule       | 5.77  | 2.53  | 0.00 | 0.00 |
| 216379_x_at | CD24    | CD24 molecule       | 5.18  | 2.37  | 0.01 | 0.01 |
| 208651_x_at | CD24    | CD24 molecule       | 4.58  | 2.19  | 0.00 | 0.00 |
| 208650_s_at | CD24    | CD24 molecule       | 3.74  | 1.91  | 0.02 | 0.03 |
| 219025_at   | CD248   | CD248 molecule      | 3.48  | 1.80  | 0.00 | 0.00 |
| 203799_at   | CD302   | CD302 molecule      | 0.17  | -2.54 | 0.00 | 0.00 |
| 206488_s_at | CD36    | CD36 molecule (     | 12.44 | 3.64  | 0.00 | 0.00 |
| 209555_s_at | CD36    | CD36 molecule (     | 7.52  | 2.91  | 0.00 | 0.00 |
| 35150_at    | CD40    | CD40 molecule,      | 6.79  | 2.76  | 0.00 | 0.00 |
| 222292_at   | CD40    | CD40 molecule,      | 0.12  | -3.07 | 0.00 | 0.00 |
| 217523_at   | CD44    | CD44 molecule (     | 0.21  | -2.25 | 0.00 | 0.00 |
| 211075_s_at | CD47    | CD47 molecule       | 5.53  | 2.47  | 0.00 | 0.00 |
| 222061_at   | CD58    | CD58 molecule       | 0.13  | -2.97 | 0.00 | 0.00 |
| 200983_x_at | CD59    | CD59 molecule,      | 4.56  | 2.19  | 0.00 | 0.00 |
| 215332_s_at | CD8B    | CD8b molecule       | 0.33  | -1.60 | 0.00 | 0.00 |
| 205627_at   | CDA     | cytidine deamina    | 4.82  | 2.27  | 0.00 | 0.00 |
| 205288_at   | CDC14A  | CDC14 cell divis    | 0.22  | -2.22 | 0.00 | 0.00 |
| 210742_at   | CDC14A  | CDC14 cell divis    | 0.16  | -2.66 | 0.00 | 0.00 |

|             |          |                    |       |       |      |      |
|-------------|----------|--------------------|-------|-------|------|------|
| 211347_at   | CDC14B   | CDC14 cell divis   | 0.27  | -1.90 | 0.00 | 0.00 |
| 203213_at   | CDC2     | cell division cycl | 0.29  | -1.81 | 0.00 | 0.00 |
| 201853_s_at | CDC25B   | cell division cycl | 4.16  | 2.06  | 0.00 | 0.00 |
| 203377_s_at | CDC40    | cell division cycl | 0.27  | -1.89 | 0.00 | 0.00 |
| 215296_at   | CDC42BPA | CDC42 binding p    | 0.32  | -1.64 | 0.00 | 0.00 |
| 209288_s_at | CDC42EP3 | CDC42 effector     | 3.60  | 1.85  | 0.00 | 0.00 |
| 209057_x_at | CDC5L    | CDC5 cell divisic  | 4.39  | 2.13  | 0.00 | 0.00 |
| 221520_s_at | CDCA8    | cell division cycl | 3.31  | 1.73  | 0.00 | 0.00 |
| 206898_at   | CDH19    | cadherin 19, typ   | 0.33  | -1.59 | 0.00 | 0.00 |
| 203256_at   | CDH3     | cadherin 3, type   | 15.05 | 3.91  | 0.00 | 0.00 |
| 204252_at   | CDK2     | cyclin-dependen    | 0.33  | -1.62 | 0.00 | 0.00 |
| 204247_s_at | CDK5     | cyclin-dependen    | 5.07  | 2.34  | 0.00 | 0.00 |
| 213348_at   | CDKN1C   | cyclin-dependen    | 3.62  | 1.86  | 0.00 | 0.00 |
| 207039_at   | CDKN2A   | cyclin-dependen    | 6.49  | 2.70  | 0.00 | 0.00 |
| 218929_at   | CDKN2AIP | CDKN2A interac     | 0.17  | -2.56 | 0.00 | 0.00 |
| 213230_at   | CDR2L    | cerebellar degen   | 4.21  | 2.07  | 0.00 | 0.00 |
| 212010_s_at | CDV3     | CDV3 homolog (     | 3.31  | 1.73  | 0.00 | 0.00 |
| 206430_at   | CDX1     | caudal type hom    | 4.86  | 2.28  | 0.00 | 0.00 |
| 201884_at   | CEACAM5  | carcinoembryoni    | 10.17 | 3.35  | 0.00 | 0.00 |
| 203757_s_at | CEACAM6  | carcinoembryoni    | 9.19  | 3.20  | 0.00 | 0.00 |
| 211657_at   | CEACAM6  | carcinoembryoni    | 8.62  | 3.11  | 0.00 | 0.00 |
| 219591_at   | CEND1    | cell cycle exit an | 4.07  | 2.02  | 0.00 | 0.00 |
| 218741_at   | CENPM    | centromere prote   | 3.77  | 1.91  | 0.00 | 0.00 |
| 219555_s_at | CENPN    | centromere prote   | 3.49  | 1.80  | 0.00 | 0.00 |
| 219294_at   | CENPQ    | centromere prote   | 0.21  | -2.24 | 0.00 | 0.00 |
| 215170_s_at | CEP152   | centrosomal proi   | 0.21  | -2.25 | 0.00 | 0.00 |
| 221683_s_at | CEP290   | centrosomal proi   | 0.11  | -3.18 | 0.00 | 0.00 |
| 203493_s_at | CEP57    | centrosomal proi   | 0.29  | -1.81 | 0.00 | 0.00 |
| 222151_s_at | CEP63    | centrosomal proi   | 0.17  | -2.58 | 0.00 | 0.00 |
| 220335_x_at | CES3     | carboxylesterase   | 8.70  | 3.12  | 0.00 | 0.00 |
| 209194_at   | CETN2    | centrin, EF-hand   | 3.66  | 1.87  | 0.00 | 0.00 |
| 210701_at   | CFDP1    | craniofacial deve  | 0.17  | -2.54 | 0.00 | 0.00 |
| 213800_at   | CFH      | complement fact    | 3.18  | 1.67  | 0.02 | 0.03 |
| 206380_s_at | CFP      | complement fact    | 0.22  | -2.17 | 0.00 | 0.00 |
| 215318_at   | CG012    | hypothetical gen   | 0.24  | -2.05 | 0.00 | 0.00 |
| 201182_s_at | CHD4     | chromodomain h     | 0.32  | -1.63 | 0.00 | 0.00 |
| 201183_s_at | CHD4     | chromodomain h     | 0.31  | -1.71 | 0.00 | 0.00 |
| 220586_at   | CHD9     | chromodomain h     | 0.29  | -1.77 | 0.00 | 0.00 |
| 210416_s_at | CHEK2    | CHK2 checkpoin     | 3.14  | 1.65  | 0.00 | 0.00 |
| 202229_s_at | CHERP    | calcium homeos     | 3.18  | 1.67  | 0.00 | 0.00 |
| 213060_s_at | CHI3L2   | chitinase 3-like 2 | 3.96  | 1.99  | 0.00 | 0.01 |
| 204591_at   | CHL1     | cell adhesion mc   | 0.20  | -2.36 | 0.00 | 0.00 |
| 218178_s_at | CHMP1B   | chromatin modif    | 4.28  | 2.10  | 0.00 | 0.00 |
| 212624_s_at | CHN1     | chimerin (chima    | 4.00  | 2.00  | 0.00 | 0.00 |
| 206149_at   | CHP2     | calcineurin B hor  | 0.12  | -3.11 | 0.00 | 0.00 |
| 202175_at   | CHPF     | chondroitin polyr  | 3.55  | 1.83  | 0.00 | 0.00 |
| 221675_s_at | CHPT1    | choline phospho    | 0.18  | -2.47 | 0.00 | 0.00 |
| 211248_s_at | CHRD     | chordin            | 0.19  | -2.42 | 0.00 | 0.00 |

|             |         |                    |       |       |      |      |
|-------------|---------|--------------------|-------|-------|------|------|
| 203921_at   | CHST2   | carbohydrate (N-   | 4.24  | 2.08  | 0.00 | 0.00 |
| 209834_at   | CHST3   | carbohydrate (ch   | 6.08  | 2.60  | 0.00 | 0.00 |
| 205007_s_at | CIB2    | calcium and inte   | 6.81  | 2.77  | 0.00 | 0.00 |
| 205008_s_at | CIB2    | calcium and inte   | 3.98  | 1.99  | 0.00 | 0.00 |
| 209571_at   | CIR1    | corepressor inter  | 0.25  | -1.98 | 0.00 | 0.00 |
| 211358_s_at | CIZ1    | CDKN1A interac     | 0.33  | -1.61 | 0.00 | 0.00 |
| 200998_s_at | CKAP4   | cytoskeleton-ass   | 3.24  | 1.70  | 0.00 | 0.00 |
| 200884_at   | CKB     | creatine kinase,   | 0.28  | -1.86 | 0.00 | 0.00 |
| 206164_at   | CLCA2   | chloride channel   | 4.54  | 2.18  | 0.00 | 0.00 |
| 206165_s_at | CLCA2   | chloride channel   | 3.41  | 1.77  | 0.02 | 0.04 |
| 206166_s_at | CLCA2   | chloride channel   | 3.29  | 1.72  | 0.00 | 0.00 |
| 220026_at   | CLCA4   | chloride channel   | 0.10  | -3.26 | 0.00 | 0.00 |
| 204482_at   | CLDN5   | claudin 5          | 0.31  | -1.69 | 0.00 | 0.00 |
| 208474_at   | CLDN6   | claudin 6          | 3.23  | 1.69  | 0.00 | 0.00 |
| 214598_at   | CLDN8   | claudin 8          | 0.04  | -4.68 | 0.00 | 0.00 |
| 209732_at   | CLEC2B  | C-type lectin dor  | 0.27  | -1.87 | 0.00 | 0.00 |
| 219947_at   | CLEC4A  | C-type lectin dor  | 0.25  | -1.99 | 0.00 | 0.00 |
| 221698_s_at | CLEC7A  | C-type lectin dor  | 4.40  | 2.14  | 0.00 | 0.00 |
| 221881_s_at | CLIC4   | chloride intracell | 3.26  | 1.70  | 0.00 | 0.00 |
| 214683_s_at | CLK1    | CDC-like kinase    | 0.28  | -1.85 | 0.00 | 0.00 |
| 210346_s_at | CLK4    | CDC-like kinase    | 0.30  | -1.72 | 0.00 | 0.00 |
| 213839_at   | CLMN    | calmin (calponin   | 0.32  | -1.66 | 0.00 | 0.00 |
| 221845_s_at | CLPB    | ClpB caseinolytic  | 3.30  | 1.72  | 0.00 | 0.00 |
| 201640_x_at | CLPTM1  | cleft lip and pala | 5.33  | 2.42  | 0.00 | 0.00 |
| 222043_at   | CLU     | clusterin          | 0.18  | -2.49 | 0.00 | 0.00 |
| 210571_s_at | CMAH    | cytidine monoph    | 0.33  | -1.60 | 0.00 | 0.00 |
| 205518_s_at | CMAH    | cytidine monoph    | 0.03  | -5.04 | 0.00 | 0.00 |
| 218111_s_at | CMAS    | cytidine monoph    | 0.30  | -1.74 | 0.00 | 0.00 |
| 206417_at   | CNGA1   | cyclic nucleotide  | 0.16  | -2.61 | 0.00 | 0.00 |
| 207342_at   | CNGB1   | cyclic nucleotide  | 4.22  | 2.08  | 0.00 | 0.00 |
| 209874_x_at | CNNM2   | cyclin M2          | 5.64  | 2.50  | 0.00 | 0.00 |
| 210867_at   | CNOT4   | CCR4-NOT tran:     | 0.16  | -2.66 | 0.00 | 0.00 |
| 202163_s_at | CNOT8   | CCR4-NOT tran:     | 0.33  | -1.60 | 0.00 | 0.00 |
| 208912_s_at | CNP     | 2',3'-cyclic nucle | 3.09  | 1.63  | 0.00 | 0.00 |
| 220323_at   | CNTD2   | cyclin N-terminal  | 5.19  | 2.38  | 0.00 | 0.00 |
| 213050_at   | COBL    | cordons-bleu hor   | 0.20  | -2.36 | 0.00 | 0.00 |
| 205229_s_at | COCH    | coagulation fact   | 0.16  | -2.66 | 0.00 | 0.00 |
| 211809_x_at | COL13A1 | collagen, type XI  | 0.30  | -1.72 | 0.00 | 0.00 |
| 202310_s_at | COL1A1  | collagen, type I,  | 3.61  | 1.85  | 0.01 | 0.01 |
| 202404_s_at | COL1A2  | collagen, type I,  | 10.44 | 3.39  | 0.00 | 0.00 |
| 202403_s_at | COL1A2  | collagen, type I,  | 7.34  | 2.88  | 0.00 | 0.00 |
| 208096_s_at | COL21A1 | collagen, type XI  | 0.12  | -3.04 | 0.00 | 0.00 |
| 215076_s_at | COL3A1  | collagen, type III | 14.37 | 3.85  | 0.00 | 0.00 |
| 211161_s_at | COL3A1  | collagen, type III | 7.22  | 2.85  | 0.00 | 0.00 |
| 201852_x_at | COL3A1  | collagen, type III | 4.97  | 2.31  | 0.00 | 0.00 |
| 211980_at   | COL4A1  | collagen, type IV  | 10.54 | 3.40  | 0.00 | 0.00 |
| 211964_at   | COL4A2  | collagen, type IV  | 14.74 | 3.88  | 0.00 | 0.00 |
| 222073_at   | COL4A3  | collagen, type IV  | 0.31  | -1.69 | 0.00 | 0.00 |

|             |            |                      |       |       |      |      |
|-------------|------------|----------------------|-------|-------|------|------|
| 212488_at   | COL5A1     | collagen, type V,    | 5.43  | 2.44  | 0.00 | 0.00 |
| 52255_s_at  | COL5A3     | collagen, type V,    | 0.15  | -2.76 | 0.00 | 0.00 |
| 201438_at   | COL6A3     | collagen, type VI    | 18.65 | 4.22  | 0.00 | 0.00 |
| 218439_s_at | COMMD10    | COMM domain c        | 4.72  | 2.24  | 0.00 | 0.00 |
| 206441_s_at | COMMD4     | COMM domain c        | 3.16  | 1.66  | 0.00 | 0.00 |
| 219561_at   | COPZ2      | coatomer proteir     | 3.03  | 1.60  | 0.00 | 0.00 |
| 64486_at    | CORO1B     | coronin, actin bir   | 3.70  | 1.89  | 0.00 | 0.00 |
| 221550_at   | COX15      | COX15 homolog        | 0.15  | -2.73 | 0.00 | 0.00 |
| 213758_at   | COX4I1     | cytochrome c ox      | 0.21  | -2.26 | 0.00 | 0.00 |
| 217249_x_at | COX7A2     | cytochrome c ox      | 3.67  | 1.87  | 0.00 | 0.00 |
| 205624_at   | CPA3       | carboxypeptidas      | 4.18  | 2.06  | 0.02 | 0.04 |
| 201116_s_at | CPE        | carboxypeptidas      | 3.32  | 1.73  | 0.00 | 0.00 |
| 209833_at   | CRADD      | CASP2 and RIPI       | 3.94  | 1.98  | 0.00 | 0.00 |
| 209432_s_at | CREB3      | cAMP responsiv       | 3.58  | 1.84  | 0.00 | 0.00 |
| 202979_s_at | CREBZF     | CREB/ATF bZIP        | 0.19  | -2.41 | 0.00 | 0.00 |
| 214508_x_at | CREM       | cAMP responsiv       | 3.80  | 1.93  | 0.00 | 0.00 |
| 205081_at   | CRIP1      | cysteine-rich pro    | 0.03  | -5.33 | 0.00 | 0.00 |
| 207802_at   | CRISP3     | cysteine-rich sec    | 3.05  | 1.61  | 0.01 | 0.02 |
| 221541_at   | CRISPLD2   | cysteine-rich sec    | 3.34  | 1.74  | 0.00 | 0.00 |
| 206274_s_at | CROCC      | ciliary rootlet coil | 0.32  | -1.67 | 0.00 | 0.00 |
| 209674_at   | CRY1       | cryptochrome 1 i     | 0.18  | -2.52 | 0.00 | 0.00 |
| 212695_at   | CRY2       | cryptochrome 2 i     | 0.29  | -1.81 | 0.00 | 0.00 |
| 220753_s_at | CRYL1      | crystallin, lambd    | 3.49  | 1.80  | 0.00 | 0.00 |
| 219049_at   | CSGALNACT1 | chondroitin sulfa    | 4.60  | 2.20  | 0.00 | 0.00 |
| 208866_at   | CSNK1A1    | casein kinase 1,     | 0.25  | -2.00 | 0.00 | 0.00 |
| 39966_at    | CSPG5      | chondroitin sulfa    | 0.25  | -2.01 | 0.00 | 0.00 |
| 200621_at   | CSRP1      | cysteine and gly     | 3.39  | 1.76  | 0.00 | 0.00 |
| 207030_s_at | CSRP2      | cysteine and gly     | 4.05  | 2.02  | 0.00 | 0.00 |
| 201201_at   | CSTB       | cystatin B (stefin   | 4.55  | 2.19  | 0.00 | 0.00 |
| 215930_s_at | CTAGE5     | CTAGE family, n      | 0.25  | -2.00 | 0.00 | 0.00 |
| 208735_s_at | CTDSP2     | CTD (carboxy-te      | 3.05  | 1.61  | 0.00 | 0.00 |
| 201533_at   | CTNNB1     | catenin (cadheri     | 0.25  | -1.99 | 0.00 | 0.00 |
| 213274_s_at | CTSB       | cathepsin B          | 4.53  | 2.18  | 0.00 | 0.00 |
| 200839_s_at | CTSB       | cathepsin B          | 3.80  | 1.92  | 0.00 | 0.00 |
| 201487_at   | CTSC       | cathepsin C          | 3.86  | 1.95  | 0.00 | 0.00 |
| 202087_s_at | CTSL1      | cathepsin L1         | 4.24  | 2.08  | 0.00 | 0.00 |
| 202901_x_at | CTSS       | cathepsin S          | 0.16  | -2.64 | 0.00 | 0.00 |
| 212562_s_at | CTSZ       | cathepsin Z          | 3.40  | 1.77  | 0.00 | 0.00 |
| 214782_at   | CTTN       | cortactin            | 0.24  | -2.09 | 0.00 | 0.00 |
| 203078_at   | CUL2       | cullin 2             | 0.25  | -2.02 | 0.00 | 0.00 |
| 201372_s_at | CUL3       | cullin 3             | 0.33  | -1.61 | 0.00 | 0.00 |
| 203533_s_at | CUL5       | cullin 5             | 0.22  | -2.20 | 0.00 | 0.00 |
| 218787_x_at | CWF19L1    | CWF19-like 1, c      | 3.34  | 1.74  | 0.00 | 0.00 |
| 823_at      | CX3CL1     | chemokine (C-X:      | 3.22  | 1.69  | 0.00 | 0.00 |
| 205898_at   | CX3CR1     | chemokine (C-X:      | 0.21  | -2.25 | 0.00 | 0.00 |
| 207850_at   | CXCL3      | chemokine (C-X:      | 0.31  | -1.70 | 0.00 | 0.00 |
| 203915_at   | CXCL9      | chemokine (C-X:      | 7.82  | 2.97  | 0.02 | 0.04 |
| 220252_x_at | CXorf21    | chromosome X c       | 0.23  | -2.10 | 0.00 | 0.00 |

|             |              |                    |       |       |      |      |
|-------------|--------------|--------------------|-------|-------|------|------|
| 219355_at   | CXorf57      | chromosome X c     | 0.19  | -2.39 | 0.00 | 0.00 |
| 203028_s_at | CYBA         | cytochrome b-24    | 6.41  | 2.68  | 0.00 | 0.00 |
| 39582_at    | CYLD         | cylindromatosis i  | 0.31  | -1.70 | 0.00 | 0.00 |
| 202435_s_at | CYP1B1       | cytochrome P45     | 0.25  | -2.02 | 0.00 | 0.00 |
| 202436_s_at | CYP1B1       | cytochrome P45     | 0.20  | -2.34 | 0.00 | 0.00 |
| 219825_at   | CYP26B1      | cytochrome P45     | 0.19  | -2.42 | 0.00 | 0.00 |
| 205676_at   | CYP27B1      | cytochrome P45     | 5.06  | 2.34  | 0.00 | 0.00 |
| 208327_at   | CYP2A13      | cytochrome P45     | 3.58  | 1.84  | 0.00 | 0.00 |
| 207786_at   | CYP2R1       | cytochrome P45     | 0.29  | -1.79 | 0.00 | 0.00 |
| 220432_s_at | CYP39A1      | cytochrome P45     | 0.18  | -2.50 | 0.00 | 0.00 |
| 205765_at   | CYP3A5       | cytochrome P45     | 0.09  | -3.55 | 0.00 | 0.00 |
| 210096_at   | CYP4B1       | cytochrome P45     | 0.06  | -4.04 | 0.00 | 0.00 |
| 206539_s_at | CYP4F12      | cytochrome P45     | 0.24  | -2.08 | 0.00 | 0.00 |
| 210452_x_at | CYP4F2       | cytochrome P45     | 4.37  | 2.13  | 0.00 | 0.00 |
| 206515_at   | CYP4F3       | cytochrome P45     | 0.23  | -2.14 | 0.00 | 0.00 |
| 209606_at   | CYTIP        | cytohesin 1 inter  | 0.20  | -2.32 | 0.00 | 0.00 |
| 216060_s_at | DAAM1        | dishevelled asso   | 0.29  | -1.77 | 0.00 | 0.00 |
| 218808_at   | DALRD3       | DALR anticodon     | 0.30  | -1.74 | 0.00 | 0.00 |
| 202806_at   | DBN1         | drebrin 1          | 7.33  | 2.87  | 0.00 | 0.00 |
| 221849_s_at | DCAF15       | DDB1 and CUL4      | 0.26  | -1.94 | 0.00 | 0.00 |
| 209804_at   | DCLRE1A      | DNA cross-link r   | 3.57  | 1.84  | 0.00 | 0.00 |
| 205337_at   | DCT          | dopachrome tau     | 0.13  | -2.99 | 0.01 | 0.01 |
| 209231_s_at | DCTN5        | dynactin 5 (p25)   | 4.15  | 2.05  | 0.00 | 0.00 |
| 202887_s_at | DDIT4        | DNA-damage-ini     | 5.04  | 2.33  | 0.00 | 0.00 |
| 212515_s_at | DDX3X        | DEAD (Asp-Glu-     | 0.32  | -1.63 | 0.00 | 0.00 |
| 204909_at   | DDX6         | DEAD (Asp-Glu-     | 0.18  | -2.47 | 0.00 | 0.00 |
| 210397_at   | DEFB1        | defensin, beta 1   | 0.31  | -1.69 | 0.02 | 0.03 |
| 207356_at   | DEFB4        | defensin, beta 4   | 63.95 | 6.00  | 0.00 | 0.00 |
| 219763_at   | DENND1A      | DENN/MADD dc       | 15.47 | 3.95  | 0.00 | 0.00 |
| 203695_s_at | DFNA5        | deafness, autosc   | 6.40  | 2.68  | 0.00 | 0.00 |
| 221887_s_at | DFNB31       | deafness, autosc   | 3.02  | 1.59  | 0.00 | 0.00 |
| 201790_s_at | DHCR7        | 7-dehydrocholes    | 6.64  | 2.73  | 0.00 | 0.00 |
| 201791_s_at | DHCR7        | 7-dehydrocholes    | 5.71  | 2.51  | 0.00 | 0.00 |
| 212107_s_at | DHX9         | DEAH (Asp-Glu-     | 0.18  | -2.44 | 0.00 | 0.00 |
| 205603_s_at | DIAPH2       | diaphanous hom     | 0.23  | -2.14 | 0.00 | 0.00 |
| 206061_s_at | DICER1       | dicer 1, ribonucl  | 0.27  | -1.89 | 0.00 | 0.00 |
| 213229_at   | DICER1       | dicer 1, ribonucl  | 0.27  | -1.92 | 0.00 | 0.00 |
| 211215_x_at | DIO2         | deiodinase, iodo   | 4.40  | 2.14  | 0.00 | 0.00 |
| 220572_at   | DKFZp547G183 | hypothetical LOC   | 0.31  | -1.69 | 0.00 | 0.00 |
| 220284_at   | DKKL1        | dickkopf-like 1 (ε | 3.45  | 1.79  | 0.00 | 0.00 |
| 220512_at   | DLC1         | deleted in liver c | 0.33  | -1.61 | 0.00 | 0.00 |
| 202571_s_at | DLGAP4       | discs, large (Dro  | 3.90  | 1.96  | 0.00 | 0.00 |
| 207147_at   | DLX2         | distal-less home   | 5.07  | 2.34  | 0.00 | 0.00 |
| 208250_s_at | DMBT1        | deleted in malign  | 3.52  | 1.82  | 0.00 | 0.00 |
| 203791_at   | DMXL1        | Dmx-like 1         | 0.31  | -1.68 | 0.00 | 0.00 |
| 215266_at   | DNAH3        | dynein, axonemc    | 3.05  | 1.61  | 0.00 | 0.00 |
| 220395_at   | DNAJA4       | DnaJ (Hsp40) hc    | 3.53  | 1.82  | 0.00 | 0.00 |
| 203810_at   | DNAJB4       | DnaJ (Hsp40) hc    | 0.24  | -2.08 | 0.00 | 0.00 |

|             |          |                     |       |       |      |      |
|-------------|----------|---------------------|-------|-------|------|------|
| 212817_at   | DNAJB5   | DnaJ (Hsp40) hc     | 3.23  | 1.69  | 0.00 | 0.00 |
| 202843_at   | DNAJB9   | DnaJ (Hsp40) hc     | 0.27  | -1.90 | 0.00 | 0.00 |
| 212911_at   | DNAJC16  | DnaJ (Hsp40) hc     | 0.16  | -2.68 | 0.00 | 0.00 |
| 205554_s_at | DNASE1L3 | deoxyribonuclea     | 0.27  | -1.91 | 0.00 | 0.00 |
| 202253_s_at | DNM2     | dynamain 2          | 3.51  | 1.81  | 0.00 | 0.00 |
| 203187_at   | DOCK1    | dedicator of cyto   | 0.18  | -2.47 | 0.00 | 0.00 |
| 219279_at   | DOCK10   | dedicator of cyto   | 0.25  | -2.03 | 0.00 | 0.00 |
| 213482_at   | DOCK3    | dedicator of cyto   | 0.25  | -2.02 | 0.00 | 0.00 |
| 221677_s_at | DONSON   | downstream neig     | 0.28  | -1.83 | 0.00 | 0.00 |
| 40612_at    | DOPEY1   | dopey family me     | 0.20  | -2.31 | 0.00 | 0.00 |
| 213267_at   | DOPEY1   | dopey family me     | 0.10  | -3.33 | 0.00 | 0.00 |
| 214301_s_at | DPYSL4   | dihydropyrimidin    | 3.18  | 1.67  | 0.00 | 0.00 |
| 206590_x_at | DRD2     | dopamine recepl     | 3.69  | 1.88  | 0.00 | 0.00 |
| 207648_at   | DRP2     | dystrophin relate   | 4.05  | 2.02  | 0.00 | 0.00 |
| 204751_x_at | DSC2     | desmocollin 2       | 45.86 | 5.52  | 0.00 | 0.00 |
| 204750_s_at | DSC2     | desmocollin 2       | 10.89 | 3.45  | 0.00 | 0.00 |
| 206642_at   | DSG1     | desmoglein 1        | 0.20  | -2.35 | 0.02 | 0.03 |
| 205595_at   | DSG3     | desmoglein 3 (pr    | 24.53 | 4.62  | 0.00 | 0.00 |
| 221681_s_at | DSPP     | dentin sialophos    | 0.25  | -2.02 | 0.00 | 0.00 |
| 214253_s_at | DTNB     | dystrobrevin, bet   | 6.94  | 2.79  | 0.00 | 0.00 |
| 205762_s_at | DUS4L    | dihydrouridine sy   | 0.24  | -2.06 | 0.00 | 0.00 |
| 201537_s_at | DUSP3    | dual specificity p  | 3.04  | 1.61  | 0.00 | 0.00 |
| 208892_s_at | DUSP6    | dual specificity p  | 3.50  | 1.81  | 0.00 | 0.00 |
| 220774_at   | DYM      | dymeclin            | 0.15  | -2.71 | 0.00 | 0.00 |
| 205348_s_at | DYNC111  | dynein, cytoplası   | 0.27  | -1.88 | 0.00 | 0.00 |
| 203763_at   | DYNC2L11 | dynein, cytoplası   | 0.30  | -1.75 | 0.00 | 0.00 |
| 202971_s_at | DYRK2    | dual-specificity ty | 0.32  | -1.64 | 0.00 | 0.00 |
| 218660_at   | DYSF     | dysferlin, limb gii | 4.62  | 2.21  | 0.00 | 0.00 |
| 204556_s_at | DZIP1    | DAZ interacting j   | 3.04  | 1.60  | 0.00 | 0.00 |
| 2028_s_at   | E2F1     | E2F transcription   | 3.49  | 1.80  | 0.00 | 0.00 |
| 38707_r_at  | E2F4     | E2F transcription   | 15.50 | 3.95  | 0.00 | 0.00 |
| 211129_x_at | EDA      | ectodysplasin A     | 0.31  | -1.67 | 0.00 | 0.00 |
| 220048_at   | EDAR     | ectodysplasin A     | 3.24  | 1.69  | 0.00 | 0.00 |
| 220926_s_at | EDEM3    | ER degradation      | 0.32  | -1.63 | 0.00 | 0.00 |
| 206758_at   | EDN2     | endothelin 2        | 4.51  | 2.17  | 0.00 | 0.00 |
| 204840_s_at | EEA1     | early endosome      | 0.17  | -2.55 | 0.00 | 0.00 |
| 210656_at   | EED      | embryonic ectod     | 0.21  | -2.29 | 0.00 | 0.00 |
| 219833_s_at | EFHC1    | EF-hand domain      | 0.32  | -1.67 | 0.00 | 0.00 |
| 220591_s_at | EFHC2    | EF-hand domain      | 0.11  | -3.15 | 0.00 | 0.00 |
| 205031_at   | EFNB3    | ephrin-B3           | 3.26  | 1.70  | 0.00 | 0.00 |
| 206115_at   | EGR3     | early growth resı   | 0.15  | -2.73 | 0.00 | 0.00 |
| 221755_at   | EHBP1L1  | EH domain bindi     | 3.60  | 1.85  | 0.00 | 0.00 |
| 205341_at   | EHD2     | EH-domain cont:     | 3.50  | 1.81  | 0.00 | 0.00 |
| 218935_at   | EHD3     | EH-domain cont:     | 5.41  | 2.44  | 0.00 | 0.00 |
| 205222_at   | EHHADH   | enoyl-Coenzyme      | 0.31  | -1.69 | 0.00 | 0.00 |
| 211698_at   | EID1     | EP300 interactin    | 0.31  | -1.71 | 0.00 | 0.00 |
| 205321_at   | EIF2S3   | eukaryotic transl   | 0.14  | -2.79 | 0.00 | 0.00 |
| 208708_x_at | EIF5     | eukaryotic transl   | 3.65  | 1.87  | 0.00 | 0.00 |

|             |          |                     |      |       |      |      |
|-------------|----------|---------------------|------|-------|------|------|
| 208290_s_at | EIF5     | eukaryotic transl   | 3.55 | 1.83  | 0.00 | 0.01 |
| 210361_s_at | ELF2     | E74-like factor 2   | 0.18 | -2.47 | 0.00 | 0.00 |
| 210827_s_at | ELF3     | E74-like factor 3   | 5.75 | 2.52  | 0.00 | 0.00 |
| 203490_at   | ELF4     | E74-like factor 4   | 4.98 | 2.32  | 0.00 | 0.00 |
| 204095_s_at | ELL      | elongation factor   | 3.56 | 1.83  | 0.00 | 0.00 |
| 214446_at   | ELL2     | elongation factor   | 3.31 | 1.73  | 0.00 | 0.00 |
| 219518_s_at | ELL3     | elongation factor   | 0.17 | -2.58 | 0.00 | 0.00 |
| 219517_at   | ELL3     | elongation factor   | 0.15 | -2.73 | 0.00 | 0.00 |
| 219532_at   | ELOVL4   | elongation of ver   | 0.25 | -2.00 | 0.01 | 0.01 |
| 210868_s_at | ELOVL6   | ELOVL family m      | 0.31 | -1.70 | 0.00 | 0.00 |
| 204397_at   | EML2     | echinoderm micr     | 3.79 | 1.92  | 0.00 | 0.00 |
| 201324_at   | EMP1     | epithelial membr    | 0.33 | -1.61 | 0.00 | 0.00 |
| 213895_at   | EMP1     | epithelial membr    | 0.21 | -2.26 | 0.00 | 0.00 |
| 221950_at   | EMX2     | empty spiracles i   | 0.31 | -1.70 | 0.00 | 0.00 |
| 220559_at   | EN1      | engrailed homec     | 0.22 | -2.19 | 0.00 | 0.00 |
| 220349_s_at | ENGASE   | endo-beta-N-ace     | 0.33 | -1.59 | 0.00 | 0.00 |
| 201719_s_at | EPB41L2  | erythrocyte mem     | 0.19 | -2.42 | 0.00 | 0.00 |
| 206710_s_at | EPB41L3  | erythrocyte mem     | 4.08 | 2.03  | 0.00 | 0.00 |
| 201839_s_at | EPCAM    | epithelial cell adl | 0.28 | -1.84 | 0.01 | 0.02 |
| 209588_at   | EPHB2    | EPH receptor B2     | 4.73 | 2.24  | 0.00 | 0.00 |
| 209589_s_at | EPHB2    | EPH receptor B2     | 3.34 | 1.74  | 0.00 | 0.00 |
| 204718_at   | EPHB6    | EPH receptor B6     | 0.32 | -1.64 | 0.00 | 0.00 |
| 202909_at   | EPM2AIP1 | EPM2A (laforin)     | 0.31 | -1.70 | 0.00 | 0.00 |
| 203464_s_at | EPN2     | epsin 2             | 0.24 | -2.05 | 0.00 | 0.00 |
| 396_f_at    | EPOR     | erythropoietin re   | 8.34 | 3.06  | 0.00 | 0.00 |
| 215054_at   | EPOR     | erythropoietin re   | 0.30 | -1.75 | 0.00 | 0.00 |
| 217886_at   | EPS15    | epidermal growtl    | 0.30 | -1.76 | 0.00 | 0.00 |
| 221056_x_at | EPS15L1  | epidermal growtl    | 5.31 | 2.41  | 0.00 | 0.00 |
| 202609_at   | EPS8     | epidermal growtl    | 0.20 | -2.36 | 0.00 | 0.00 |
| 218778_x_at | EPS8L1   | EPS8-like 1         | 3.80 | 1.93  | 0.00 | 0.00 |
| 214012_at   | ERAP1    | endoplasmic reti    | 0.08 | -3.69 | 0.00 | 0.00 |
| 217941_s_at | ERBB2IP  | erbb2 interacting   | 0.32 | -1.66 | 0.00 | 0.00 |
| 211234_x_at | ESR1     | estrogen receptc    | 3.09 | 1.63  | 0.00 | 0.00 |
| 211627_x_at | ESR1     | estrogen receptc    | 0.22 | -2.17 | 0.00 | 0.00 |
| 204034_at   | ETHE1    | ethylmalonic enc    | 7.53 | 2.91  | 0.00 | 0.00 |
| 205585_at   | ETV6     | ets variant 6       | 0.33 | -1.61 | 0.00 | 0.00 |
| 210887_s_at | EVC      | Ellis van Crevelc   | 3.97 | 1.99  | 0.00 | 0.00 |
| 209527_at   | EXOSC2   | exosome compo       | 0.30 | -1.72 | 0.00 | 0.00 |
| 214734_at   | EXPH5    | exophilin 5         | 0.27 | -1.90 | 0.00 | 0.00 |
| 213929_at   | EXPH5    | exophilin 5         | 0.09 | -3.52 | 0.00 | 0.00 |
| 214985_at   | EXT1     | exostoses (multi    | 0.33 | -1.61 | 0.00 | 0.00 |
| 211310_at   | EZH1     | enhancer of zest    | 0.16 | -2.66 | 0.00 | 0.00 |
| 203989_x_at | F2R      | coagulation factc   | 0.11 | -3.13 | 0.00 | 0.00 |
| 210445_at   | FABP6    | fatty acid binding  | 4.23 | 2.08  | 0.00 | 0.00 |
| 205029_s_at | FABP7    | fatty acid binding  | 0.11 | -3.17 | 0.00 | 0.00 |
| 205030_at   | FABP7    | fatty acid binding  | 0.02 | -5.96 | 0.00 | 0.00 |
| 202218_s_at | FADS2    | fatty acid desatu   | 3.46 | 1.79  | 0.00 | 0.00 |
| 221602_s_at | FAIM3    | Fas apoptotic inf   | 4.29 | 2.10  | 0.00 | 0.00 |



|             |          |                   |      |       |      |      |
|-------------|----------|-------------------|------|-------|------|------|
| 221249_s_at | FAM117A  | family with sequ  | 0.18 | -2.48 | 0.00 | 0.00 |
| 222129_at   | FAM134A  | family with sequ  | 0.20 | -2.35 | 0.00 | 0.00 |
| 218532_s_at | FAM134B  | family with sequ  | 0.28 | -1.86 | 0.00 | 0.00 |
| 217047_s_at | FAM13A   | family with sequ  | 0.23 | -2.09 | 0.00 | 0.00 |
| 202973_x_at | FAM13A   | family with sequ  | 0.18 | -2.47 | 0.00 | 0.00 |
| 218337_at   | FAM160B2 | family with sequ  | 3.91 | 1.97  | 0.00 | 0.00 |
| 205308_at   | FAM164A  | family with sequ  | 0.24 | -2.08 | 0.00 | 0.00 |
| 36612_at    | FAM168A  | family with sequ  | 0.30 | -1.72 | 0.00 | 0.00 |
| 51158_at    | FAM174B  | family with sequ  | 0.19 | -2.38 | 0.00 | 0.00 |
| 203482_at   | FAM178A  | family with sequ  | 0.33 | -1.60 | 0.00 | 0.00 |
| 213304_at   | FAM179B  | family with sequ  | 0.29 | -1.77 | 0.00 | 0.00 |
| 220150_s_at | FAM184A  | family with sequ  | 0.22 | -2.18 | 0.00 | 0.00 |
| 213900_at   | FAM189A2 | family with sequ  | 0.12 | -3.07 | 0.00 | 0.00 |
| 202915_s_at | FAM20B   | family with sequ  | 0.31 | -1.68 | 0.00 | 0.00 |
| 201889_at   | FAM3C    | family with sequ  | 0.30 | -1.75 | 0.00 | 0.00 |
| 216682_s_at | FAM48A   | family with sequ  | 0.14 | -2.87 | 0.00 | 0.00 |
| 45749_at    | FAM65A   | family with sequ  | 3.51 | 1.81  | 0.00 | 0.00 |
| 204781_s_at | FAS      | Fas (TNF recept   | 0.27 | -1.87 | 0.00 | 0.00 |
| 215719_x_at | FAS      | Fas (TNF recept   | 0.20 | -2.33 | 0.00 | 0.00 |
| 210975_x_at | FASTK    | Fas-activated se  | 3.26 | 1.71  | 0.00 | 0.00 |
| 205976_at   | FASTKD2  | FAST kinase dor   | 0.32 | -1.64 | 0.00 | 0.00 |
| 203184_at   | FBN2     | fibrillin 2       | 3.93 | 1.97  | 0.00 | 0.00 |
| 220896_at   | FBXL18   | F-box and leucin  | 3.60 | 1.85  | 0.00 | 0.00 |
| 211734_s_at | FCER1A   | Fc fragment of Iç | 0.26 | -1.93 | 0.00 | 0.00 |
| 215567_at   | FCF1     | FCF1 small sub    | 0.19 | -2.40 | 0.00 | 0.00 |
| 211396_at   | FCGR2C   | Fc fragment of Iç | 4.41 | 2.14  | 0.00 | 0.00 |
| 212373_at   | FEM1B    | fem-1 homolog t   | 0.32 | -1.65 | 0.00 | 0.00 |
| 203562_at   | FEZ1     | fasciculation and | 4.18 | 2.06  | 0.00 | 0.00 |
| 222164_at   | FGFR1    | fibroblast growth | 0.10 | -3.28 | 0.00 | 0.00 |
| 201540_at   | FHL1     | four and a half L | 0.09 | -3.48 | 0.00 | 0.00 |
| 202949_s_at | FHL2     | four and a half L | 3.61 | 1.85  | 0.00 | 0.00 |
| 214119_s_at | FKBP1A   | FK506 binding p   | 5.72 | 2.52  | 0.00 | 0.00 |
| 210186_s_at | FKBP1A   | FK506 binding p   | 5.07 | 2.34  | 0.00 | 0.00 |
| 205283_at   | FKTN     | fukutin           | 0.30 | -1.75 | 0.00 | 0.00 |
| 215645_at   | FLCN     | folliculin        | 0.26 | -1.94 | 0.00 | 0.00 |
| 205511_at   | FLJ10038 | hypothetical prot | 0.12 | -3.07 | 0.00 | 0.00 |
| 220828_s_at | FLJ11292 | hypothetical prot | 0.22 | -2.16 | 0.00 | 0.00 |
| 219871_at   | FLJ13197 | hypothetical FLJ  | 0.20 | -2.30 | 0.00 | 0.00 |
| 208613_s_at | FLNB     | filamin B, beta   | 5.42 | 2.44  | 0.00 | 0.00 |
| 210142_x_at | FLOT1    | flotillin 1       | 4.77 | 2.26  | 0.00 | 0.00 |
| 208749_x_at | FLOT1    | flotillin 1       | 4.36 | 2.12  | 0.00 | 0.00 |
| 201350_at   | FLOT2    | flotillin 2       | 3.28 | 1.72  | 0.00 | 0.00 |
| 210316_at   | FLT4     | fms-related tyros | 0.26 | -1.96 | 0.00 | 0.00 |
| 205666_at   | FMO1     | flavin containing | 0.27 | -1.87 | 0.00 | 0.00 |
| 211726_s_at | FMO2     | flavin containing | 3.54 | 1.83  | 0.01 | 0.01 |
| 215300_s_at | FMO5     | flavin containing | 0.11 | -3.19 | 0.00 | 0.00 |
| 203689_s_at | FMR1     | fragile X mental  | 0.31 | -1.68 | 0.00 | 0.00 |
| 216442_x_at | FN1      | fibronectin 1     | 4.27 | 2.09  | 0.02 | 0.03 |

|             |         |                      |       |       |      |      |
|-------------|---------|----------------------|-------|-------|------|------|
| 210495_x_at | FN1     | fibronectin 1        | 4.18  | 2.06  | 0.03 | 0.04 |
| 204420_at   | FOSL1   | FOS-like antigen     | 3.93  | 1.97  | 0.00 | 0.00 |
| 213260_at   | FOXC1   | forkhead box C1      | 5.90  | 2.56  | 0.00 | 0.00 |
| 206912_at   | FOXE1   | forkhead box E1      | 9.97  | 3.32  | 0.00 | 0.00 |
| 205021_s_at | FOXN3   | forkhead box N3      | 4.87  | 2.28  | 0.00 | 0.00 |
| 205022_s_at | FOXN3   | forkhead box N3      | 0.31  | -1.68 | 0.00 | 0.00 |
| 218031_s_at | FOXN3   | forkhead box N3      | 0.19  | -2.43 | 0.00 | 0.00 |
| 205119_s_at | FPR1    | formyl peptide re    | 3.74  | 1.90  | 0.00 | 0.00 |
| 208475_at   | FRMD4A  | FERM domain c        | 0.31  | -1.69 | 0.00 | 0.00 |
| 208476_s_at | FRMD4A  | FERM domain c        | 0.19  | -2.41 | 0.00 | 0.00 |
| 214319_at   | FRY     | furry homolog (D     | 0.30  | -1.72 | 0.00 | 0.00 |
| 204072_s_at | FRY     | furry homolog (D     | 0.22  | -2.19 | 0.00 | 0.00 |
| 212546_s_at | FRYL    | FRY-like             | 0.23  | -2.11 | 0.00 | 0.00 |
| 203698_s_at | FRZB    | frizzled-related p   | 3.75  | 1.91  | 0.00 | 0.00 |
| 201564_s_at | FSCN1   | fascin homolog 1     | 4.14  | 2.05  | 0.00 | 0.00 |
| 208782_at   | FSTL1   | folliculin-like 1    | 7.73  | 2.95  | 0.00 | 0.00 |
| 213187_x_at | FTL     | ferritin, light poly | 3.75  | 1.91  | 0.00 | 0.00 |
| 212847_at   | FUBP1   | far upstream ele     | 0.15  | -2.72 | 0.00 | 0.00 |
| 214093_s_at | FUBP1   | far upstream ele     | 0.15  | -2.73 | 0.00 | 0.00 |
| 204299_at   | FUSIP1  | FUS interacting j    | 0.29  | -1.78 | 0.00 | 0.00 |
| 210608_s_at | FUT2    | fucosyltransferas    | 7.23  | 2.85  | 0.00 | 0.00 |
| 214088_s_at | FUT3    | fucosyltransferas    | 4.63  | 2.21  | 0.00 | 0.00 |
| 210399_x_at | FUT6    | fucosyltransferas    | 5.02  | 2.33  | 0.00 | 0.00 |
| 211465_x_at | FUT6    | fucosyltransferas    | 4.53  | 2.18  | 0.00 | 0.00 |
| 201636_at   | FXR1    | fragile X mental     | 0.27  | -1.88 | 0.00 | 0.00 |
| 218084_x_at | FXYD5   | FXYD domain cc       | 5.45  | 2.45  | 0.00 | 0.00 |
| 212486_s_at | FYN     | FYN oncogene r       | 0.26  | -1.92 | 0.00 | 0.00 |
| 221245_s_at | FZD5    | frizzled homolog     | 4.99  | 2.32  | 0.00 | 0.00 |
| 222187_x_at | G3BP1   | GTPase activator     | 0.31  | -1.70 | 0.00 | 0.00 |
| 219815_at   | GAL3ST4 | galactose-3-O-s      | 0.29  | -1.78 | 0.00 | 0.00 |
| 204417_at   | GALC    | galactosylceram      | 0.23  | -2.15 | 0.00 | 0.00 |
| 202528_at   | GALE    | UDP-galactose-4      | 3.26  | 1.71  | 0.00 | 0.00 |
| 212256_at   | GALNT10 | UDP-N-acetyl-gl      | 3.65  | 1.87  | 0.00 | 0.00 |
| 219271_at   | GALNT14 | UDP-N-acetyl-gl      | 11.39 | 3.51  | 0.00 | 0.00 |
| 219956_at   | GALNT6  | UDP-N-acetyl-gl      | 5.80  | 2.54  | 0.00 | 0.00 |
| 33579_j_at  | GALR3   | galanin receptor     | 4.63  | 2.21  | 0.00 | 0.00 |
| 220124_at   | GAN     | gigaxonin            | 0.23  | -2.12 | 0.00 | 0.00 |
| 214626_s_at | GANAB   | glucosidase, alpl    | 3.03  | 1.60  | 0.00 | 0.00 |
| 202191_s_at | GAS7    | growth arrest-sp     | 0.30  | -1.76 | 0.00 | 0.00 |
| 202192_s_at | GAS7    | growth arrest-sp     | 0.29  | -1.81 | 0.00 | 0.00 |
| 209710_at   | GATA2   | GATA binding pr      | 3.58  | 1.84  | 0.00 | 0.00 |
| 209602_s_at | GATA3   | GATA binding pr      | 0.25  | -1.98 | 0.00 | 0.00 |
| 209604_s_at | GATA3   | GATA binding pr      | 0.25  | -2.00 | 0.00 | 0.00 |
| 209603_at   | GATA3   | GATA binding pr      | 0.24  | -2.07 | 0.00 | 0.00 |
| 216733_s_at | GATM    | glycine amidinot     | 0.23  | -2.11 | 0.00 | 0.00 |
| 203178_at   | GATM    | glycine amidinot     | 0.07  | -3.94 | 0.00 | 0.00 |
| 202269_x_at | GBP1    | guanylate bindin     | 3.16  | 1.66  | 0.00 | 0.00 |
| 203765_at   | GCA     | grancalcin, EF-h     | 0.12  | -3.07 | 0.00 | 0.00 |

|             |         |                    |      |       |      |      |
|-------------|---------|--------------------|------|-------|------|------|
| 36475_at    | GCAT    | glycine C-acetyl   | 3.85 | 1.94  | 0.00 | 0.00 |
| 219539_at   | GEMIN6  | gem (nuclear org   | 3.26 | 1.71  | 0.00 | 0.00 |
| 221028_s_at | GFOD2   | glucose-fructose   | 3.69 | 1.88  | 0.00 | 0.00 |
| 202721_s_at | GFPT1   | glutamine-fructo   | 3.02 | 1.59  | 0.00 | 0.00 |
| 64064_at    | GIMAP5  | GTPase, IMAP f     | 3.46 | 1.79  | 0.00 | 0.00 |
| 219970_at   | GIPC2   | GIPC PDZ doma      | 0.10 | -3.38 | 0.00 | 0.00 |
| 206540_at   | GLB1L   | galactosidase, b   | 4.40 | 2.14  | 0.00 | 0.00 |
| 221510_s_at | GLS     | glutaminase        | 0.31 | -1.71 | 0.00 | 0.00 |
| 205531_s_at | GLS2    | glutaminase 2 (li  | 0.26 | -1.97 | 0.00 | 0.00 |
| 218506_x_at | GLYR1   | glyoxylate reduc   | 0.27 | -1.87 | 0.00 | 0.00 |
| 206355_at   | GNAL    | guanine nucleoti   | 0.26 | -1.93 | 0.00 | 0.00 |
| 214071_at   | GNAL    | guanine nucleoti   | 0.18 | -2.44 | 0.00 | 0.00 |
| 211871_x_at | GNB5    | guanine nucleoti   | 3.43 | 1.78  | 0.00 | 0.00 |
| 207124_s_at | GNB5    | guanine nucleoti   | 3.41 | 1.77  | 0.00 | 0.00 |
| 204115_at   | GNG11   | guanine nucleoti   | 3.36 | 1.75  | 0.00 | 0.00 |
| 207987_s_at | GNRH1   | gonadotropin-rel   | 0.27 | -1.91 | 0.00 | 0.00 |
| 208519_x_at | GNRH2   | gonadotropin-rel   | 3.21 | 1.68  | 0.00 | 0.00 |
| 201567_s_at | GOLGA4  | golgi autoantiger  | 0.33 | -1.61 | 0.00 | 0.00 |
| 215203_at   | GOLGA4  | golgi autoantiger  | 0.13 | -2.98 | 0.00 | 0.00 |
| 208798_x_at | GOLGA8A | golgi autoantiger  | 0.27 | -1.89 | 0.00 | 0.00 |
| 208797_s_at | GOLGA8A | golgi autoantiger  | 0.17 | -2.53 | 0.00 | 0.00 |
| 213737_x_at | GOLGA9P | golgi autoantiger  | 0.25 | -2.02 | 0.00 | 0.00 |
| 204322_at   | GOLIM4  | golgi integral me  | 3.28 | 1.71  | 0.00 | 0.00 |
| 217771_at   | GOLM1   | golgi membrane     | 4.48 | 2.16  | 0.00 | 0.00 |
| 218692_at   | GOLSYN  | Golgi-localized p  | 0.11 | -3.19 | 0.00 | 0.00 |
| 219846_at   | GON4L   | gon-4-like (C. elk | 0.29 | -1.80 | 0.00 | 0.00 |
| 213144_at   | GOSR2   | golgi SNAP rece    | 4.11 | 2.04  | 0.00 | 0.00 |
| 200708_at   | GOT2    | glutamic-oxaloac   | 3.00 | 1.59  | 0.00 | 0.00 |
| 209769_s_at | GP1BB   | glycoprotein Ib (I | 3.82 | 1.93  | 0.00 | 0.00 |
| 206883_x_at | GP9     | glycoprotein IX (I | 3.42 | 1.77  | 0.00 | 0.00 |
| 210007_s_at | GPD2    | glycerol-3-phosp   | 0.21 | -2.25 | 0.00 | 0.00 |
| 215554_at   | GPLD1   | glycosylphospha    | 0.05 | -4.20 | 0.00 | 0.00 |
| 213094_at   | GPR126  | G protein-couple   | 0.17 | -2.59 | 0.00 | 0.00 |
| 220901_at   | GPR157  | G protein-couple   | 0.23 | -2.12 | 0.00 | 0.00 |
| 221958_s_at | GPR177  | G protein-couple   | 0.28 | -1.84 | 0.00 | 0.00 |
| 204793_at   | GPRASP1 | G protein-couple   | 0.28 | -1.86 | 0.00 | 0.00 |
| 203108_at   | GPRC5A  | G protein-couple   | 4.28 | 2.10  | 0.00 | 0.00 |
| 200736_s_at | GPX1    | glutathione pero:  | 3.40 | 1.77  | 0.00 | 0.00 |
| 202831_at   | GPX2    | glutathione pero:  | 7.85 | 2.97  | 0.00 | 0.00 |
| 201348_at   | GPX3    | glutathione pero:  | 6.52 | 2.71  | 0.01 | 0.02 |
| 214091_s_at | GPX3    | glutathione pero:  | 4.37 | 2.13  | 0.01 | 0.02 |
| 219313_at   | GRAMD1C | GRAM domain c      | 0.25 | -1.98 | 0.00 | 0.00 |
| 218706_s_at | GRAMD3  | GRAM domain c      | 0.18 | -2.44 | 0.00 | 0.00 |
| 216481_at   | GRIP2   | glutamate recept   | 4.82 | 2.27  | 0.00 | 0.00 |
| 207929_at   | GRPR    | gastrin-releasing  | 3.05 | 1.61  | 0.00 | 0.00 |
| 215659_at   | GSDMB   | gasdermin B        | 0.31 | -1.69 | 0.00 | 0.00 |
| 222102_at   | GSTA3   | glutathione S-tra  | 0.10 | -3.30 | 0.00 | 0.00 |
| 209595_at   | GTF2F2  | general transcrip  | 0.27 | -1.90 | 0.00 | 0.00 |

|             |           |                   |       |       |      |      |
|-------------|-----------|-------------------|-------|-------|------|------|
| 205276_s_at | GTPBP1    | GTP binding pro   | 4.91  | 2.30  | 0.00 | 0.00 |
| 204235_s_at | GULP1     | GULP, engulfme    | 0.16  | -2.68 | 0.00 | 0.00 |
| 204237_at   | GULP1     | GULP, engulfme    | 0.14  | -2.88 | 0.00 | 0.00 |
| 205488_at   | GZMA      | granzyme A (gra   | 4.26  | 2.09  | 0.00 | 0.00 |
| 208579_x_at | H2BFS     | H2B histone fam   | 5.15  | 2.37  | 0.00 | 0.00 |
| 221892_at   | H6PD      | hexose-6-phospl   | 0.17  | -2.58 | 0.00 | 0.00 |
| 213054_at   | HAUS5     | HAUS augmin-lil   | 0.33  | -1.59 | 0.00 | 0.00 |
| 218602_s_at | HAUS6     | HAUS augmin-lil   | 0.18  | -2.45 | 0.00 | 0.00 |
| 217232_x_at | HBB       | hemoglobin, bet   | 3.21  | 1.68  | 0.01 | 0.02 |
| 38037_at    | HBEGF     | heparin-binding I | 8.28  | 3.05  | 0.00 | 0.00 |
| 203821_at   | HBEGF     | heparin-binding I | 4.88  | 2.29  | 0.00 | 0.00 |
| 209315_at   | HBS1L     | HBS1-like (S. ce  | 0.19  | -2.42 | 0.00 | 0.00 |
| 209314_s_at | HBS1L     | HBS1-like (S. ce  | 0.18  | -2.50 | 0.00 | 0.00 |
| 214893_x_at | HCN2      | hyperpolarizati   | 3.21  | 1.68  | 0.00 | 0.00 |
| 216224_s_at | HDAC6     | histone deacetyl  | 3.77  | 1.92  | 0.00 | 0.00 |
| 213069_at   | HEG1      | HEG homolog 1     | 3.56  | 1.83  | 0.00 | 0.00 |
| 220085_at   | HELLS     | helicase, lymphc  | 0.25  | -1.98 | 0.00 | 0.00 |
| 219863_at   | HERC5     | hect domain and   | 4.72  | 2.24  | 0.00 | 0.00 |
| 219352_at   | HERC6     | hect domain and   | 10.06 | 3.33  | 0.00 | 0.00 |
| 214308_s_at | HGD       | homogentisate 1   | 3.69  | 1.88  | 0.00 | 0.00 |
| 219687_at   | HHAT      | hedgehog acyltr   | 3.81  | 1.93  | 0.00 | 0.00 |
| 221162_at   | HHLA1     | HERV-H LTR-as     | 3.26  | 1.71  | 0.00 | 0.00 |
| 216911_s_at | HIC2      | hypermethylated   | 4.10  | 2.03  | 0.00 | 0.00 |
| 205425_at   | HIP1      | huntingtin intera | 0.33  | -1.59 | 0.00 | 0.00 |
| 212293_at   | HIPK1     | homeodomain in    | 0.23  | -2.13 | 0.00 | 0.00 |
| 203253_s_at | HISPPD1   | histidine acid ph | 0.31  | -1.68 | 0.00 | 0.00 |
| 214542_x_at | HIST1H2AI | histone cluster 1 | 7.39  | 2.89  | 0.00 | 0.00 |
| 208583_x_at | HIST1H2AJ | histone cluster 1 | 11.39 | 3.51  | 0.00 | 0.00 |
| 208527_x_at | HIST1H2BE | histone cluster 1 | 3.51  | 1.81  | 0.00 | 0.00 |
| 208490_x_at | HIST1H2BF | histone cluster 1 | 4.81  | 2.27  | 0.00 | 0.00 |
| 209806_at   | HIST1H2BK | histone cluster 1 | 4.92  | 2.30  | 0.00 | 0.00 |
| 204512_at   | HIVEP1    | human immunoc     | 0.28  | -1.85 | 0.00 | 0.00 |
| 220042_x_at | HIVEP3    | human immunoc     | 4.30  | 2.10  | 0.00 | 0.00 |
| 215536_at   | HLA-DQB2  | major histocomp   | 0.33  | -1.62 | 0.02 | 0.03 |
| 204753_s_at | HLF       | hepatic leukemia  | 0.29  | -1.80 | 0.00 | 0.00 |
| 204754_at   | HLF       | hepatic leukemia  | 0.26  | -1.96 | 0.00 | 0.00 |
| 204755_x_at | HLF       | hepatic leukemia  | 0.23  | -2.14 | 0.00 | 0.00 |
| 207353_s_at | HMX1      | H6 family homec   | 4.02  | 2.01  | 0.00 | 0.00 |
| 217755_at   | HN1       | hematological ar  | 4.05  | 2.02  | 0.00 | 0.00 |
| 211732_x_at | HNMT      | histamine N-met   | 0.33  | -1.62 | 0.00 | 0.00 |
| 221919_at   | HNRNPA1   | heterogeneous r   | 0.08  | -3.68 | 0.00 | 0.00 |
| 211930_at   | HNRNPA3   | heterogeneous r   | 0.26  | -1.94 | 0.00 | 0.00 |
| 213359_at   | HNRNPD    | heterogeneous r   | 0.29  | -1.79 | 0.00 | 0.00 |
| 213472_at   | HNRNPH1   | heterogeneous r   | 0.21  | -2.27 | 0.00 | 0.00 |
| 202072_at   | HNRNPL    | heterogeneous r   | 5.09  | 2.35  | 0.00 | 0.00 |
| 66053_at    | HNRNPUL2  | heterogeneous r   | 0.24  | -2.05 | 0.00 | 0.00 |
| 212454_x_at | HNRPDL    | heterogeneous r   | 0.23  | -2.11 | 0.00 | 0.00 |
| 222222_s_at | HOMER3    | homer homolog     | 4.78  | 2.26  | 0.00 | 0.00 |

|             |          |                     |       |       |      |      |
|-------------|----------|---------------------|-------|-------|------|------|
| 208224_at   | HOXB1    | homeobox B1         | 3.76  | 1.91  | 0.00 | 0.00 |
| 205366_s_at | HOXB6    | homeobox B6         | 0.31  | -1.69 | 0.00 | 0.00 |
| 204779_s_at | HOXB7    | homeobox B7         | 9.15  | 3.19  | 0.00 | 0.00 |
| 216973_s_at | HOXB7    | homeobox B7         | 3.83  | 1.94  | 0.00 | 0.00 |
| 219832_s_at | HOXC13   | homeobox C13        | 3.57  | 1.83  | 0.00 | 0.00 |
| 206858_s_at | HOXC6    | homeobox C6         | 0.19  | -2.44 | 0.00 | 0.00 |
| 221350_at   | HOXC8    | homeobox C8         | 0.15  | -2.73 | 0.00 | 0.00 |
| 214604_at   | HOXD11   | homeobox D11        | 7.40  | 2.89  | 0.00 | 0.00 |
| 205522_at   | HOXD4    | homeobox D4         | 4.76  | 2.25  | 0.00 | 0.00 |
| 220633_s_at | HP1BP3   | heterochromatin     | 3.15  | 1.66  | 0.00 | 0.00 |
| 206726_at   | HPGDS    | hematopoietic pr    | 0.11  | -3.24 | 0.00 | 0.00 |
| 54037_at    | HPS4     | Hermansky-Pudl      | 0.30  | -1.74 | 0.00 | 0.00 |
| 219403_s_at | HPSE     | heparanase          | 4.35  | 2.12  | 0.00 | 0.00 |
| 219984_s_at | HRASLS   | HRAS-like suppr     | 0.23  | -2.15 | 0.00 | 0.00 |
| 219983_at   | HRASLS   | HRAS-like suppr     | 0.16  | -2.68 | 0.00 | 0.00 |
| 221663_x_at | HRH3     | histamine recept    | 3.79  | 1.92  | 0.00 | 0.00 |
| 217989_at   | HSD17B11 | hydroxysteroid (    | 0.29  | -1.79 | 0.00 | 0.00 |
| 209512_at   | HSDL2    | hydroxysteroid d    | 0.31  | -1.71 | 0.01 | 0.01 |
| 209657_s_at | HSF2     | heat shock trans    | 0.25  | -2.00 | 0.00 | 0.00 |
| 214163_at   | HSPB11   | heat shock prote    | 0.28  | -1.86 | 0.00 | 0.00 |
| 219998_at   | HSPC159  | galectin-related j  | 0.28  | -1.85 | 0.00 | 0.00 |
| 207578_s_at | HTR4     | 5-hydroxytryptan    | 3.46  | 1.79  | 0.00 | 0.00 |
| 204883_s_at | HUS1     | HUS1 checkpoin      | 3.02  | 1.59  | 0.00 | 0.00 |
| 220249_at   | HYAL4    | hyaluronoglucos     | 4.35  | 2.12  | 0.00 | 0.00 |
| 215513_at   | HYMAI    | hydatidiform mol    | 0.09  | -3.51 | 0.00 | 0.00 |
| 204569_at   | ICK      | intestinal cell (M  | 0.21  | -2.24 | 0.00 | 0.00 |
| 208937_s_at | ID1      | inhibitor of DNA    | 6.20  | 2.63  | 0.00 | 0.00 |
| 209293_x_at | ID4      | inhibitor of DNA    | 0.19  | -2.43 | 0.00 | 0.00 |
| 209291_at   | ID4      | inhibitor of DNA    | 0.10  | -3.39 | 0.00 | 0.00 |
| 209292_at   | ID4      | inhibitor of DNA    | 0.06  | -4.20 | 0.00 | 0.00 |
| 210029_at   | IDO1     | indoleamine 2,3-    | 3.26  | 1.71  | 0.00 | 0.00 |
| 202438_x_at | IDS      | iduronate 2-sulfa   | 0.24  | -2.04 | 0.00 | 0.00 |
| 209721_s_at | IFFO1    | intermediate filar  | 3.31  | 1.73  | 0.00 | 0.00 |
| 202411_at   | IFI27    | interferon, alpha   | 15.40 | 3.94  | 0.00 | 0.00 |
| 209417_s_at | IFI35    | interferon-induce   | 3.04  | 1.60  | 0.00 | 0.00 |
| 214453_s_at | IFI44    | interferon-induce   | 14.78 | 3.89  | 0.00 | 0.00 |
| 204439_at   | IFI44L   | interferon-induce   | 8.23  | 3.04  | 0.00 | 0.00 |
| 204415_at   | IFI6     | interferon, alpha   | 12.19 | 3.61  | 0.00 | 0.00 |
| 203153_at   | IFIT1    | interferon-induce   | 14.12 | 3.82  | 0.00 | 0.00 |
| 204747_at   | IFIT3    | interferon-induce   | 3.64  | 1.87  | 0.00 | 0.00 |
| 214022_s_at | IFITM1   | interferon induce   | 12.00 | 3.58  | 0.00 | 0.00 |
| 201601_x_at | IFITM1   | interferon induce   | 10.50 | 3.39  | 0.00 | 0.00 |
| 201315_x_at | IFITM2   | interferon induce   | 6.01  | 2.59  | 0.00 | 0.00 |
| 212203_x_at | IFITM3   | interferon induce   | 7.20  | 2.85  | 0.00 | 0.00 |
| 219174_at   | IFT74    | intraflagellar tran | 0.28  | -1.83 | 0.00 | 0.00 |
| 61732_r_at  | IFT74    | intraflagellar tran | 0.21  | -2.28 | 0.00 | 0.00 |
| 203628_at   | IGF1R    | insulin-like growt  | 0.25  | -2.02 | 0.00 | 0.00 |
| 203820_s_at | IGF2BP3  | insulin-like growt  | 3.06  | 1.61  | 0.00 | 0.00 |

|             |         |                     |       |       |      |      |
|-------------|---------|---------------------|-------|-------|------|------|
| 203851_at   | IGFBP6  | insulin-like growt  | 4.81  | 2.27  | 0.00 | 0.00 |
| 201163_s_at | IGFBP7  | insulin-like growt  | 5.05  | 2.34  | 0.00 | 0.00 |
| 201162_at   | IGFBP7  | insulin-like growt  | 3.91  | 1.97  | 0.00 | 0.00 |
| 31861_at    | IGHMBP2 | immunoglobulin      | 10.02 | 3.33  | 0.00 | 0.00 |
| 217148_x_at | IGL@    | immunoglobulin      | 3.74  | 1.90  | 0.00 | 0.00 |
| 215255_at   | IGSF9B  | immunoglobulin      | 0.28  | -1.84 | 0.00 | 0.00 |
| 202490_at   | IKBKAP  | inhibitor of kappa  | 0.27  | -1.91 | 0.00 | 0.00 |
| 36004_at    | IKBKG   | inhibitor of kappa  | 8.40  | 3.07  | 0.00 | 0.00 |
| 209929_s_at | IKBKG   | inhibitor of kappa  | 4.88  | 2.29  | 0.00 | 0.00 |
| 211612_s_at | IL13RA1 | interleukin 13 rec  | 4.30  | 2.11  | 0.00 | 0.00 |
| 201888_s_at | IL13RA1 | interleukin 13 rec  | 3.98  | 1.99  | 0.00 | 0.00 |
| 64440_at    | IL17RC  | interleukin 17 rec  | 6.61  | 2.73  | 0.00 | 0.00 |
| 206295_at   | IL18    | interleukin 18 (in  | 0.20  | -2.31 | 0.00 | 0.00 |
| 219323_s_at | IL18BP  | interleukin 18 bir  | 4.34  | 2.12  | 0.00 | 0.00 |
| 39402_at    | IL1B    | interleukin 1, bet  | 5.28  | 2.40  | 0.00 | 0.00 |
| 205067_at   | IL1B    | interleukin 1, bet  | 3.95  | 1.98  | 0.00 | 0.00 |
| 221470_s_at | IL1F7   | interleukin 1 fam   | 0.11  | -3.16 | 0.00 | 0.00 |
| 205403_at   | IL1R2   | interleukin 1 rec   | 0.33  | -1.62 | 0.00 | 0.00 |
| 212659_s_at | IL1RN   | interleukin 1 rec   | 4.52  | 2.18  | 0.00 | 0.00 |
| 219115_s_at | IL20RA  | interleukin 20 rec  | 0.33  | -1.59 | 0.00 | 0.00 |
| 203233_at   | IL4R    | interleukin 4 rec   | 3.90  | 1.96  | 0.00 | 0.00 |
| 206693_at   | IL7     | interleukin 7       | 0.06  | -4.15 | 0.00 | 0.00 |
| 208930_s_at | ILF3    | interleukin enhar   | 0.25  | -1.98 | 0.00 | 0.00 |
| 214705_at   | INADL   | InaD-like (Droso    | 0.07  | -3.86 | 0.00 | 0.00 |
| 205258_at   | INHBB   | inhibin, beta B     | 9.33  | 3.22  | 0.00 | 0.00 |
| 203006_at   | INPP5A  | inositol polyphos   | 0.31  | -1.68 | 0.00 | 0.00 |
| 203907_s_at | IQSEC1  | IQ motif and Sec    | 3.71  | 1.89  | 0.00 | 0.00 |
| 208436_s_at | IRF7    | interferon regula   | 3.16  | 1.66  | 0.00 | 0.00 |
| 209185_s_at | IRS2    | insulin receptor s  | 0.32  | -1.64 | 0.00 | 0.00 |
| 205483_s_at | ISG15   | ISG15 ubiquitin-l   | 6.34  | 2.67  | 0.00 | 0.00 |
| 204698_at   | ISG20   | interferon stimuk   | 3.21  | 1.68  | 0.01 | 0.02 |
| 218170_at   | ISOC1   | isochorismatase     | 0.22  | -2.16 | 0.00 | 0.00 |
| 218893_at   | ISOC2   | isochorismatase     | 3.90  | 1.96  | 0.00 | 0.00 |
| 205032_at   | ITGA2   | integrin, alpha 2   | 3.79  | 1.92  | 0.00 | 0.00 |
| 205786_s_at | ITGAM   | integrin, alpha M   | 3.79  | 1.92  | 0.00 | 0.00 |
| 202746_at   | ITM2A   | integral membra     | 0.20  | -2.33 | 0.00 | 0.00 |
| 202661_at   | ITPR2   | inositol 1,4,5-trip | 0.29  | -1.79 | 0.00 | 0.00 |
| 211360_s_at | ITPR2   | inositol 1,4,5-trip | 0.22  | -2.19 | 0.00 | 0.00 |
| 202660_at   | ITPR2   | inositol 1,4,5-trip | 0.20  | -2.31 | 0.00 | 0.00 |
| 202662_s_at | ITPR2   | inositol 1,4,5-trip | 0.14  | -2.82 | 0.00 | 0.00 |
| 216495_x_at | IVD     | isovaleryl Coenz    | 5.15  | 2.36  | 0.00 | 0.00 |
| 205841_at   | JAK2    | Janus kinase 2      | 0.18  | -2.47 | 0.00 | 0.00 |
| 218560_s_at | JMJD4   | jumonji domain c    | 3.72  | 1.90  | 0.00 | 0.00 |
| 201466_s_at | JUN     | jun oncogene        | 4.97  | 2.31  | 0.00 | 0.00 |
| 201464_x_at | JUN     | jun oncogene        | 3.75  | 1.91  | 0.00 | 0.00 |
| 218418_s_at | KANK2   | KN motif and anl    | 3.55  | 1.83  | 0.00 | 0.00 |
| 219106_s_at | KBTBD10 | kelch repeat and    | 0.24  | -2.06 | 0.00 | 0.00 |
| 210078_s_at | KCNAB1  | potassium voltaç    | 0.21  | -2.24 | 0.00 | 0.00 |

|             |          |                    |       |       |      |      |
|-------------|----------|--------------------|-------|-------|------|------|
| 213832_at   | KCND3    | potassium voltaç   | 0.26  | -1.94 | 0.00 | 0.00 |
| 210119_at   | KCNJ15   | potassium inwar    | 8.89  | 3.15  | 0.00 | 0.00 |
| 206765_at   | KCNJ2    | potassium inwar    | 0.23  | -2.10 | 0.00 | 0.00 |
| 221584_s_at | KCNMA1   | potassium large    | 3.95  | 1.98  | 0.00 | 0.00 |
| 206231_at   | KCNN1    | potassium intern   | 4.74  | 2.25  | 0.00 | 0.00 |
| 211217_s_at | KCNQ1    | potassium voltaç   | 3.04  | 1.60  | 0.00 | 0.00 |
| 207366_at   | KCNS1    | potassium voltaç   | 3.02  | 1.59  | 0.00 | 0.00 |
| 212188_at   | KCTD12   | potassium chanr    | 0.24  | -2.09 | 0.00 | 0.00 |
| 45653_at    | KCTD13   | potassium chanr    | 0.23  | -2.14 | 0.00 | 0.00 |
| 217894_at   | KCTD3    | potassium chanr    | 0.18  | -2.48 | 0.00 | 0.00 |
| 209984_at   | KDM4C    | lysine (K)-specifi | 0.24  | -2.09 | 0.00 | 0.00 |
| 202383_at   | KDM5C    | lysine (K)-specifi | 3.36  | 1.75  | 0.00 | 0.00 |
| 203991_s_at | KDM6A    | lysine (K)-specifi | 0.29  | -1.78 | 0.00 | 0.00 |
| 212523_s_at | KIAA0146 | KIAA0146           | 0.25  | -2.00 | 0.00 | 0.00 |
| 212057_at   | KIAA0182 | KIAA0182           | 0.25  | -2.02 | 0.00 | 0.00 |
| 38892_at    | KIAA0240 | KIAA0240           | 0.26  | -1.97 | 0.00 | 0.00 |
| 213208_at   | KIAA0240 | KIAA0240           | 0.21  | -2.23 | 0.00 | 0.00 |
| 214356_s_at | KIAA0368 | KIAA0368           | 0.32  | -1.63 | 0.00 | 0.00 |
| 212427_at   | KIAA0368 | KIAA0368           | 0.14  | -2.89 | 0.00 | 0.00 |
| 203900_at   | KIAA0467 | KIAA0467           | 0.23  | -2.09 | 0.00 | 0.00 |
| 214295_at   | KIAA0485 | hypothetical LOC   | 0.30  | -1.76 | 0.00 | 0.01 |
| 212943_at   | KIAA0528 | KIAA0528           | 0.19  | -2.43 | 0.00 | 0.00 |
| 204075_s_at | KIAA0562 | KIAA0562           | 0.09  | -3.47 | 0.00 | 0.00 |
| 209021_x_at | KIAA0652 | KIAA0652           | 3.06  | 1.61  | 0.00 | 0.00 |
| 215268_at   | KIAA0754 | KIAA0754           | 0.11  | -3.26 | 0.00 | 0.00 |
| 212633_at   | KIAA0776 | KIAA0776           | 0.25  | -1.99 | 0.00 | 0.00 |
| 213358_at   | KIAA0802 | KIAA0802           | 12.12 | 3.60  | 0.00 | 0.00 |
| 213424_at   | KIAA0895 | KIAA0895           | 0.04  | -4.53 | 0.00 | 0.00 |
| 214098_at   | KIAA1107 | KIAA1107           | 0.27  | -1.89 | 0.00 | 0.00 |
| 212942_s_at | KIAA1199 | KIAA1199           | 6.02  | 2.59  | 0.00 | 0.00 |
| 204444_at   | KIF11    | kinesin family m   | 0.33  | -1.59 | 0.01 | 0.02 |
| 220777_at   | KIF13A   | kinesin family m   | 0.18  | -2.52 | 0.00 | 0.00 |
| 208128_x_at | KIF25    | kinesin family m   | 3.59  | 1.84  | 0.00 | 0.00 |
| 203087_s_at | KIF2A    | kinesin heavy ch   | 3.34  | 1.74  | 0.00 | 0.00 |
| 203130_s_at | KIF5C    | kinesin family m   | 0.22  | -2.18 | 0.00 | 0.00 |
| 221302_at   | KLF15    | Kruppel-like fact  | 3.55  | 1.83  | 0.00 | 0.00 |
| 220266_s_at | KLF4     | Kruppel-like fact  | 0.20  | -2.35 | 0.00 | 0.00 |
| 209212_s_at | KLF5     | Kruppel-like fact  | 0.15  | -2.78 | 0.00 | 0.00 |
| 209211_at   | KLF5     | Kruppel-like fact  | 0.14  | -2.85 | 0.00 | 0.00 |
| 204334_at   | KLF7     | Kruppel-like fact  | 6.19  | 2.63  | 0.00 | 0.00 |
| 219930_at   | KLF8     | Kruppel-like fact  | 0.22  | -2.18 | 0.00 | 0.00 |
| 203543_s_at | KLF9     | Kruppel-like fact  | 0.15  | -2.79 | 0.00 | 0.00 |
| 204176_at   | KLHL20   | kelch-like 20 (Dr  | 0.23  | -2.12 | 0.00 | 0.00 |
| 221986_s_at | KLHL24   | kelch-like 24 (Dr  | 0.14  | -2.82 | 0.00 | 0.00 |
| 216699_s_at | KLK1     | kallikrein 1       | 0.33  | -1.60 | 0.00 | 0.00 |
| 205470_s_at | KLK11    | kallikrein-related | 0.29  | -1.81 | 0.01 | 0.02 |
| 220782_x_at | KLK12    | kallikrein-related | 10.34 | 3.37  | 0.00 | 0.00 |
| 205783_at   | KLK13    | kallikrein-related | 4.73  | 2.24  | 0.00 | 0.00 |

|             |          |                    |        |       |      |      |
|-------------|----------|--------------------|--------|-------|------|------|
| 204733_at   | KLK6     | kallikrein-related | 36.32  | 5.18  | 0.00 | 0.00 |
| 206316_s_at | KNTC1    | kinetochore assc   | 0.31   | -1.68 | 0.00 | 0.00 |
| 204010_s_at | KRAS     | v-Ki-ras2 Kirsten  | 0.13   | -2.90 | 0.00 | 0.00 |
| 216713_at   | KRIT1    | KRIT1, ankyrin r   | 0.31   | -1.67 | 0.00 | 0.00 |
| 34031_i_at  | KRIT1    | KRIT1, ankyrin r   | 0.18   | -2.50 | 0.00 | 0.00 |
| 203203_s_at | KRR1     | KRR1, small sub    | 0.20   | -2.31 | 0.00 | 0.00 |
| 207935_s_at | KRT13    | keratin 13         | 30.54  | 4.93  | 0.00 | 0.00 |
| 209800_at   | KRT16    | keratin 16         | 46.49  | 5.54  | 0.00 | 0.00 |
| 205157_s_at | KRT17    | keratin 17         | 28.30  | 4.82  | 0.00 | 0.00 |
| 212236_x_at | KRT17    | keratin 17         | 25.51  | 4.67  | 0.00 | 0.00 |
| 207908_at   | KRT2     | keratin 2          | 0.08   | -3.58 | 0.02 | 0.03 |
| 218963_s_at | KRT23    | keratin 23 (histor | 0.27   | -1.90 | 0.01 | 0.02 |
| 206677_at   | KRT31    | keratin 31         | 0.23   | -2.10 | 0.01 | 0.01 |
| 206969_at   | KRT34    | keratin 34         | 4.82   | 2.27  | 0.00 | 0.00 |
| 209125_at   | KRT6A    | keratin 6A         | 408.60 | 8.68  | 0.00 | 0.00 |
| 213680_at   | KRT6B    | keratin 6B         | 669.17 | 9.39  | 0.00 | 0.00 |
| 209126_x_at | KRT6B    | keratin 6B         | 92.65  | 6.53  | 0.00 | 0.00 |
| 207065_at   | KRT75    | keratin 75         | 55.49  | 5.79  | 0.00 | 0.00 |
| 208188_at   | KRT9     | keratin 9          | 7.39   | 2.89  | 0.00 | 0.00 |
| 208532_x_at | KRTAP5-8 | keratin associate  | 6.43   | 2.69  | 0.00 | 0.00 |
| 217388_s_at | KYNU     | kynureninase (L-   | 9.95   | 3.31  | 0.00 | 0.00 |
| 204385_at   | KYNU     | kynureninase (L-   | 4.62   | 2.21  | 0.00 | 0.00 |
| 220089_at   | L2HGDH   | L-2-hydroxygluta   | 0.25   | -2.01 | 0.00 | 0.00 |
| 216076_at   | L3MBTL   | l(3)mbt-like (Dro: | 3.63   | 1.86  | 0.00 | 0.00 |
| 210306_at   | L3MBTL   | l(3)mbt-like (Dro: | 0.17   | -2.54 | 0.00 | 0.00 |
| 210089_s_at | LAMA4    | laminin, alpha 4   | 0.29   | -1.77 | 0.00 | 0.00 |
| 209270_at   | LAMB3    | laminin, beta 3    | 5.93   | 2.57  | 0.00 | 0.00 |
| 215516_at   | LAMB4    | laminin, beta 4    | 0.06   | -4.19 | 0.00 | 0.00 |
| 200770_s_at | LAMC1    | laminin, gamma     | 3.41   | 1.77  | 0.00 | 0.00 |
| 212193_s_at | LARP1    | La ribonucleoprc   | 0.29   | -1.78 | 0.00 | 0.00 |
| 212446_s_at | LASS6    | LAG1 homolog, i    | 0.31   | -1.70 | 0.00 | 0.00 |
| 212442_s_at | LASS6    | LAG1 homolog, i    | 0.25   | -2.01 | 0.00 | 0.00 |
| 207734_at   | LAX1     | lymphocyte trans   | 0.24   | -2.06 | 0.00 | 0.00 |
| 212531_at   | LCN2     | lipocalin 2        | 23.37  | 4.55  | 0.00 | 0.00 |
| 201030_x_at | LDHB     | lactate dehydrog   | 3.10   | 1.63  | 0.01 | 0.01 |
| 202068_s_at | LDLR     | low density lipop  | 4.34   | 2.12  | 0.00 | 0.00 |
| 202067_s_at | LDLR     | low density lipop  | 3.29   | 1.72  | 0.00 | 0.00 |
| 204454_at   | LDOC1    | leucine zipper, d  | 0.23   | -2.11 | 0.00 | 0.00 |
| 201105_at   | LGALS1   | lectin, galactosid | 3.64   | 1.86  | 0.00 | 0.00 |
| 200923_at   | LGALS3BP | lectin, galactosid | 4.01   | 2.00  | 0.00 | 0.00 |
| 218326_s_at | LGR4     | leucine-rich repe  | 0.25   | -1.99 | 0.00 | 0.00 |
| 214471_x_at | LHB      | luteinizing hormc  | 3.24   | 1.69  | 0.00 | 0.00 |
| 212658_at   | LHFPL2   | lipoma HMGIC fi    | 6.04   | 2.59  | 0.00 | 0.00 |
| 206140_at   | LHX2     | LIM homeobox 2     | 4.35   | 2.12  | 0.02 | 0.04 |
| 205266_at   | LIF      | leukemia inhibitc  | 0.24   | -2.06 | 0.00 | 0.00 |
| 211336_x_at | LILRB1   | leukocyte immur    | 3.71   | 1.89  | 0.00 | 0.00 |
| 212325_at   | LIMCH1   | LIM and calponir   | 3.62   | 1.85  | 0.00 | 0.00 |
| 204356_at   | LIMK1    | LIM domain kina    | 3.68   | 1.88  | 0.00 | 0.00 |



|             |              |                    |       |       |      |      |
|-------------|--------------|--------------------|-------|-------|------|------|
| 201847_at   | LIPA         | lipase A, lysosor  | 4.98  | 2.32  | 0.00 | 0.00 |
| 219181_at   | LIPG         | lipase, endotheli  | 6.65  | 2.73  | 0.00 | 0.00 |
| 206123_at   | LLGL1        | lethal giant larva | 4.21  | 2.08  | 0.00 | 0.00 |
| 218574_s_at | LMCD1        | LIM and cysteine   | 5.54  | 2.47  | 0.00 | 0.00 |
| 219136_s_at | LMF1         | lipase maturator   | 0.25  | -2.00 | 0.00 | 0.00 |
| 46142_at    | LMF1         | lipase maturator   | 0.22  | -2.21 | 0.00 | 0.00 |
| 217548_at   | LOC100129502 | hypothetical prot  | 0.30  | -1.73 | 0.00 | 0.00 |
| 214850_at   | LOC100170939 | glucuronidase, b   | 0.17  | -2.60 | 0.00 | 0.00 |
| 213605_s_at | LOC100272216 | hypothetical LOC   | 0.32  | -1.63 | 0.00 | 0.00 |
| 213089_at   | LOC100272216 | hypothetical LOC   | 0.32  | -1.65 | 0.00 | 0.00 |
| 213703_at   | LOC150759    | hypothetical prot  | 0.13  | -2.99 | 0.00 | 0.00 |
| 215978_x_at | LOC152719    | hypothetical prot  | 3.65  | 1.87  | 0.00 | 0.00 |
| 220609_at   | LOC202181    | hypothetical prot  | 0.11  | -3.15 | 0.00 | 0.00 |
| 213510_x_at | LOC220594    | TL132 protein      | 0.31  | -1.67 | 0.00 | 0.00 |
| 217219_at   | LOC26102     | hypothetical LOC   | 3.83  | 1.94  | 0.00 | 0.00 |
| 216387_x_at | LOC399804    | similar to nucleo  | 0.33  | -1.59 | 0.00 | 0.00 |
| 217667_at   | LOC729799    | SEC14-like 1 psr   | 0.27  | -1.91 | 0.00 | 0.00 |
| 214712_at   | LOC730092    | RRN3 RNA poly      | 0.28  | -1.85 | 0.00 | 0.00 |
| 215202_at   | LOC91316     | glucuronidase, b   | 4.00  | 2.00  | 0.00 | 0.00 |
| 213502_x_at | LOC91316     | glucuronidase, b   | 0.32  | -1.64 | 0.01 | 0.02 |
| 215446_s_at | LOX          | lysyl oxidase      | 5.71  | 2.52  | 0.00 | 0.00 |
| 202998_s_at | LOXL2        | lysyl oxidase-like | 3.78  | 1.92  | 0.00 | 0.00 |
| 204037_at   | LPAR1        | lysophosphatidic   | 0.28  | -1.82 | 0.00 | 0.00 |
| 201818_at   | LPCAT1       | lysophosphatidyl   | 3.47  | 1.80  | 0.00 | 0.00 |
| 40472_at    | LPCAT4       | lysophosphatidyl   | 0.27  | -1.88 | 0.00 | 0.00 |
| 215409_at   | LPCAT4       | lysophosphatidyl   | 0.14  | -2.80 | 0.00 | 0.00 |
| 219145_at   | LPHN1        | latrophilin 1      | 0.29  | -1.79 | 0.00 | 0.00 |
| 209867_s_at | LPHN3        | latrophilin 3      | 5.08  | 2.35  | 0.00 | 0.00 |
| 35974_at    | LRMP         | lymphoid-restrict  | 0.33  | -1.60 | 0.00 | 0.00 |
| 204381_at   | LRP3         | low density lipop  | 3.26  | 1.70  | 0.00 | 0.00 |
| 212850_s_at | LRP4         | low density lipop  | 0.13  | -2.92 | 0.00 | 0.00 |
| 34697_at    | LRP6         | low density lipop  | 0.21  | -2.24 | 0.00 | 0.00 |
| 220220_at   | LRR37A4      | leucine rich repe  | 0.26  | -1.92 | 0.00 | 0.00 |
| 208140_s_at | LRR37A4      | leucine rich repe  | 0.26  | -1.97 | 0.00 | 0.00 |
| 222231_s_at | LRR37A4      | leucine rich repe  | 7.40  | 2.89  | 0.00 | 0.00 |
| 218907_s_at | LRR37A4      | leucine rich repe  | 3.55  | 1.83  | 0.00 | 0.00 |
| 212976_at   | LRR37A4      | leucine rich repe  | 0.28  | -1.82 | 0.00 | 0.00 |
| 215375_x_at | LRR37A4      | leucine rich repe  | 0.29  | -1.77 | 0.00 | 0.00 |
| 216164_at   | LRR37A4      | leucine rich repe  | 3.38  | 1.76  | 0.00 | 0.00 |
| 212924_s_at | LRR37A4      | leucine rich repe  | 3.95  | 1.98  | 0.00 | 0.00 |
| 211018_at   | LSS          | lanosterol synthe  | 0.24  | -2.06 | 0.00 | 0.01 |
| 202729_s_at | LTBP1        | latent transformii | 12.93 | 3.69  | 0.00 | 0.00 |
| 202728_s_at | LTBP1        | latent transformii | 3.15  | 1.66  | 0.00 | 0.00 |
| 208835_s_at | LUC7L3       | LUC7-like 3 (S. c  | 0.21  | -2.24 | 0.00 | 0.00 |
| 201744_s_at | LUM          | lumican            | 3.66  | 1.87  | 0.01 | 0.01 |
| 205668_at   | LY75         | lymphocyte antiç   | 0.11  | -3.17 | 0.00 | 0.00 |
| 213975_s_at | LYZ          | lysozyme (renal    | 6.63  | 2.73  | 0.00 | 0.00 |
| 219188_s_at | MACROD1      | MACRO domain       | 0.33  | -1.61 | 0.00 | 0.00 |

|             |         |                   |       |       |      |      |
|-------------|---------|-------------------|-------|-------|------|------|
| 209348_s_at | MAF     | v-maf musculoar   | 0.25  | -1.99 | 0.00 | 0.00 |
| 206144_at   | MAGI1   | membrane assoi    | 0.32  | -1.66 | 0.00 | 0.00 |
| 217282_at   | MAN1A2  | mannosidase, al   | 0.14  | -2.88 | 0.00 | 0.00 |
| 219999_at   | MAN2A2  | mannosidase, al   | 0.10  | -3.34 | 0.00 | 0.00 |
| 204389_at   | MAOA    | monoamine oxid    | 0.23  | -2.14 | 0.00 | 0.00 |
| 215498_s_at | MAP2K3  | mitogen-activate  | 0.28  | -1.85 | 0.00 | 0.00 |
| 216765_at   | MAP2K5  | mitogen-activate  | 0.13  | -2.95 | 0.00 | 0.00 |
| 216206_x_at | MAP2K7  | mitogen-activate  | 0.24  | -2.06 | 0.00 | 0.00 |
| 214786_at   | MAP3K1  | mitogen-activate  | 0.19  | -2.41 | 0.00 | 0.00 |
| 206362_x_at | MAP3K10 | mitogen-activate  | 3.08  | 1.62  | 0.00 | 0.00 |
| 206249_at   | MAP3K13 | mitogen-activate  | 0.33  | -1.59 | 0.00 | 0.00 |
| 205027_s_at | MAP3K8  | mitogen-activate  | 0.25  | -2.03 | 0.00 | 0.00 |
| 218311_at   | MAP4K3  | mitogen-activate  | 0.09  | -3.43 | 0.00 | 0.00 |
| 211081_s_at | MAP4K5  | mitogen-activate  | 0.06  | -4.19 | 0.00 | 0.00 |
| 211500_at   | MAPK11  | mitogen-activate  | 4.76  | 2.25  | 0.00 | 0.00 |
| 211561_x_at | MAPK14  | mitogen-activate  | 4.06  | 2.02  | 0.00 | 0.00 |
| 210570_x_at | MAPK9   | mitogen-activate  | 3.06  | 1.62  | 0.00 | 0.00 |
| 206401_s_at | MAPT    | microtubule-assc  | 0.28  | -1.83 | 0.00 | 0.00 |
| 214048_at   | MBD4    | methyl-CpG binc   | 0.23  | -2.10 | 0.00 | 0.00 |
| 218411_s_at | MBIP    | MAP3K12 bindin    | 0.25  | -2.01 | 0.00 | 0.00 |
| 201151_s_at | MBNL1   | muscleblind-like  | 0.29  | -1.77 | 0.00 | 0.00 |
| 211037_s_at | MBOAT7  | membrane boun     | 3.29  | 1.72  | 0.00 | 0.00 |
| 207115_x_at | MBTD1   | mbt domain cont   | 0.22  | -2.21 | 0.00 | 0.00 |
| 208568_at   | MC2R    | melanocortin 2 r  | 3.39  | 1.76  | 0.00 | 0.00 |
| 211340_s_at | MCAM    | melanoma cell a   | 16.54 | 4.05  | 0.00 | 0.00 |
| 209087_x_at | MCAM    | melanoma cell a   | 7.52  | 2.91  | 0.00 | 0.00 |
| 209086_x_at | MCAM    | melanoma cell a   | 6.01  | 2.59  | 0.00 | 0.00 |
| 210869_s_at | MCAM    | melanoma cell a   | 5.34  | 2.42  | 0.00 | 0.00 |
| 220464_at   | MCF2L   | MCF.2 cell line d | 0.22  | -2.16 | 0.00 | 0.00 |
| 212935_at   | MCF2L   | MCF.2 cell line d | 0.17  | -2.55 | 0.00 | 0.00 |
| 35147_at    | MCF2L   | MCF.2 cell line d | 0.15  | -2.77 | 0.00 | 0.00 |
| 209035_at   | MDK     | midkine (neurite  | 3.37  | 1.75  | 0.00 | 0.00 |
| 213761_at   | MDM1    | Mdm1 nuclear pi   | 0.15  | -2.74 | 0.00 | 0.00 |
| 202616_s_at | MECP2   | methyl CpG binc   | 0.26  | -1.95 | 0.00 | 0.00 |
| 218664_at   | MECR    | mitochondrial tra | 5.62  | 2.49  | 0.00 | 0.00 |
| 203497_at   | MED1    | mediator comple   | 0.23  | -2.15 | 0.00 | 0.00 |
| 212208_at   | MED13L  | mediator comple   | 0.33  | -1.59 | 0.00 | 0.00 |
| 212207_at   | MED13L  | mediator comple   | 0.23  | -2.12 | 0.00 | 0.00 |
| 216109_at   | MED13L  | mediator comple   | 0.12  | -3.06 | 0.00 | 0.00 |
| 202611_s_at | MED14   | mediator comple   | 0.25  | -1.98 | 0.00 | 0.00 |
| 221418_s_at | MED16   | mediator comple   | 3.70  | 1.89  | 0.00 | 0.00 |
| 221517_s_at | MED17   | mediator comple   | 0.33  | -1.59 | 0.00 | 0.00 |
| 51176_at    | MED27   | mediator comple   | 3.44  | 1.78  | 0.00 | 0.00 |
| 207078_at   | MED6    | mediator comple   | 0.08  | -3.69 | 0.00 | 0.00 |
| 208328_s_at | MEF2A   | myocyte enhanc    | 0.27  | -1.89 | 0.00 | 0.00 |
| 212831_at   | MEGF9   | multiple EGF-like | 0.24  | -2.07 | 0.00 | 0.00 |
| 213899_at   | METAP2  | methionyl amino   | 0.33  | -1.61 | 0.00 | 0.00 |
| 220797_at   | METT10D | methyltransferas  | 0.25  | -2.03 | 0.00 | 0.00 |

|             |          |                      |       |       |      |      |
|-------------|----------|----------------------|-------|-------|------|------|
| 213653_at   | METTL3   | methyltransferas     | 0.26  | -1.95 | 0.00 | 0.00 |
| 209703_x_at | METTL7A  | methyltransferas     | 0.26  | -1.94 | 0.00 | 0.00 |
| 211424_x_at | METTL7A  | methyltransferas     | 0.21  | -2.27 | 0.00 | 0.00 |
| 203417_at   | MFAP2    | microfibrillar-ass   | 6.55  | 2.71  | 0.00 | 0.00 |
| 205442_at   | MFAP3L   | microfibrillar-ass   | 0.23  | -2.15 | 0.00 | 0.00 |
| 219858_s_at | MFSD6    | major faciilitator ε | 0.19  | -2.38 | 0.00 | 0.00 |
| 211386_at   | MGC12488 | hypothetical prot    | 0.18  | -2.45 | 0.00 | 0.00 |
| 202291_s_at | MGP      | matrix Gla protei    | 3.87  | 1.95  | 0.01 | 0.01 |
| 212473_s_at | MICAL2   | microtubule assc     | 3.28  | 1.71  | 0.00 | 0.00 |
| 212472_at   | MICAL2   | microtubule assc     | 3.04  | 1.61  | 0.00 | 0.00 |
| 203636_at   | MID1     | midline 1 (Opitz/    | 6.06  | 2.60  | 0.00 | 0.00 |
| 221863_at   | MIER2    | mesoderm induc       | 4.67  | 2.22  | 0.00 | 0.00 |
| 214625_s_at | MINK1    | misshapen-like k     | 4.35  | 2.12  | 0.00 | 0.00 |
| 216845_x_at | MLL2     | myeloid/lymphoi      | 4.68  | 2.23  | 0.00 | 0.00 |
| 216382_s_at | MLL2     | myeloid/lymphoi      | 3.11  | 1.64  | 0.00 | 0.00 |
| 211071_s_at | MLLT11   | myeloid/lymphoi      | 3.02  | 1.59  | 0.01 | 0.01 |
| 204918_s_at | MLLT3    | myeloid/lymphoi      | 0.29  | -1.81 | 0.00 | 0.00 |
| 214939_x_at | MLLT4    | myeloid/lymphoi      | 3.43  | 1.78  | 0.00 | 0.00 |
| 203414_at   | MMD      | monocyte to mar      | 0.27  | -1.87 | 0.00 | 0.00 |
| 204475_at   | MMP1     | matrix metallope     | 16.61 | 4.05  | 0.01 | 0.02 |
| 205680_at   | MMP10    | matrix metallope     | 7.21  | 2.85  | 0.00 | 0.00 |
| 203878_s_at | MMP11    | matrix metallope     | 5.57  | 2.48  | 0.00 | 0.00 |
| 202828_s_at | MMP14    | matrix metallope     | 4.06  | 2.02  | 0.00 | 0.00 |
| 201069_at   | MMP2     | matrix metallope     | 5.85  | 2.55  | 0.00 | 0.00 |
| 203936_s_at | MMP9     | matrix metallope     | 3.85  | 1.94  | 0.01 | 0.01 |
| 219959_at   | MOCOS    | molybdenum cof       | 3.22  | 1.69  | 0.00 | 0.00 |
| 219852_s_at | MORN1    | MORN repeat cc       | 9.09  | 3.19  | 0.00 | 0.00 |
| 221771_s_at | MPHOSPH8 | M-phase phosph       | 0.27  | -1.90 | 0.00 | 0.00 |
| 201874_at   | MPZL1    | myelin protein ze    | 8.32  | 3.06  | 0.00 | 0.00 |
| 210594_x_at | MPZL1    | myelin protein ze    | 5.33  | 2.41  | 0.00 | 0.00 |
| 210087_s_at | MPZL1    | myelin protein ze    | 4.65  | 2.22  | 0.00 | 0.00 |
| 201875_s_at | MPZL1    | myelin protein ze    | 3.21  | 1.68  | 0.00 | 0.00 |
| 203779_s_at | MPZL2    | myelin protein ze    | 3.79  | 1.92  | 0.00 | 0.00 |
| 210528_at   | MR1      | major histocomp      | 0.24  | -2.08 | 0.00 | 0.00 |
| 217919_s_at | MRPL42   | mitochondrial rib    | 3.49  | 1.80  | 0.00 | 0.00 |
| 215919_s_at | MRPS11   | mitochondrial rib    | 0.27  | -1.87 | 0.00 | 0.00 |
| 219666_at   | MS4A6A   | membrane-span        | 9.99  | 3.32  | 0.00 | 0.00 |
| 205887_x_at | MSH3     | mutS homolog 3       | 0.19  | -2.42 | 0.00 | 0.00 |
| 218733_at   | MSL2     | male-specific letl   | 0.23  | -2.14 | 0.00 | 0.00 |
| 207430_s_at | MSMB     | microseminoprof      | 0.26  | -1.96 | 0.02 | 0.04 |
| 219281_at   | MSRA     | methionine sulfo     | 3.42  | 1.77  | 0.00 | 0.00 |
| 218773_s_at | MSRB2    | methionine sulfo     | 3.24  | 1.70  | 0.00 | 0.00 |
| 204326_x_at | MT1X     | metallothionein 1    | 0.29  | -1.78 | 0.00 | 0.00 |
| 204956_at   | MTAP     | methylthioadeno      | 0.24  | -2.05 | 0.00 | 0.00 |
| 203347_s_at | MTF2     | metal response ε     | 0.16  | -2.67 | 0.00 | 0.00 |
| 220346_at   | MTHFD2L  | methylenetetrah      | 0.33  | -1.62 | 0.00 | 0.00 |
| 36920_at    | MTM1     | myotubularin 1       | 0.16  | -2.61 | 0.00 | 0.00 |
| 219822_at   | MTRF1    | mitochondrial tra    | 0.30  | -1.73 | 0.00 | 0.00 |

|             |            |                    |       |       |      |      |
|-------------|------------|--------------------|-------|-------|------|------|
| 203199_s_at | MTRR       | 5-methyltetrahyd   | 0.28  | -1.82 | 0.00 | 0.00 |
| 36907_at    | MVK        | mevalonate kina    | 4.34  | 2.12  | 0.00 | 0.00 |
| 202086_at   | MX1        | myxovirus (influe  | 39.03 | 5.29  | 0.00 | 0.00 |
| 204994_at   | MX2        | myxovirus (influe  | 13.44 | 3.75  | 0.00 | 0.00 |
| 206877_at   | MXD1       | MAX dimerizatio    | 3.24  | 1.70  | 0.00 | 0.00 |
| 212509_s_at | MXRA7      | matrix-remodelli   | 3.05  | 1.61  | 0.00 | 0.00 |
| 213422_s_at | MXRA8      | matrix-remodelli   | 3.20  | 1.68  | 0.00 | 0.00 |
| 204798_at   | MYB        | v-myb myeloblas    | 0.17  | -2.58 | 0.00 | 0.00 |
| 213906_at   | MYBL1      | v-myb myeloblas    | 0.29  | -1.81 | 0.00 | 0.00 |
| 201710_at   | MYBL2      | v-myb myeloblas    | 3.68  | 1.88  | 0.00 | 0.00 |
| 208040_s_at | MYBPC3     | myosin binding p   | 4.15  | 2.05  | 0.00 | 0.00 |
| 212372_at   | MYH10      | myosin, heavy cl   | 3.53  | 1.82  | 0.00 | 0.00 |
| 219946_x_at | MYH14      | myosin, heavy cl   | 7.97  | 3.00  | 0.00 | 0.00 |
| 205940_at   | MYH3       | myosin, heavy cl   | 0.29  | -1.80 | 0.00 | 0.00 |
| 220319_s_at | MYLIP      | myosin regulator   | 0.23  | -2.12 | 0.00 | 0.00 |
| 202555_s_at | MYLK       | myosin light chai  | 6.87  | 2.78  | 0.00 | 0.00 |
| 212365_at   | MYO1B      | myosin IB          | 5.38  | 2.43  | 0.00 | 0.00 |
| 212364_at   | MYO1B      | myosin IB          | 3.13  | 1.65  | 0.00 | 0.00 |
| 204527_at   | MYO5A      | myosin VA (heav    | 4.39  | 2.13  | 0.00 | 0.00 |
| 203215_s_at | MYO6       | myosin VI          | 0.29  | -1.79 | 0.00 | 0.00 |
| 206657_s_at | MYOD1      | myogenic differe   | 3.59  | 1.84  | 0.00 | 0.00 |
| 219509_at   | MYOZ1      | myozenin 1         | 4.93  | 2.30  | 0.00 | 0.00 |
| 213375_s_at | N4BP2L1    | NEDD4 binding p    | 0.16  | -2.63 | 0.00 | 0.00 |
| 202258_s_at | N4BP2L2    | NEDD4 binding p    | 0.32  | -1.65 | 0.00 | 0.00 |
| 221899_at   | N4BP2L2    | NEDD4 binding p    | 0.25  | -1.98 | 0.00 | 0.00 |
| 214753_at   | N4BP2L2    | NEDD4 binding p    | 0.21  | -2.23 | 0.00 | 0.00 |
| 202259_s_at | N4BP2L2    | NEDD4 binding p    | 0.19  | -2.39 | 0.00 | 0.00 |
| 204860_s_at | NAIP       | NLR family, apo    | 0.20  | -2.34 | 0.00 | 0.00 |
| 220184_at   | NANOG      | Nanog homeobo      | 0.27  | -1.90 | 0.00 | 0.00 |
| 219368_at   | NAP1L2     | nucleosome ass     | 0.09  | -3.44 | 0.00 | 0.00 |
| 204749_at   | NAP1L3     | nucleosome ass     | 0.28  | -1.84 | 0.00 | 0.00 |
| 219158_s_at | NARG1      | NMDA receptor i    | 0.31  | -1.68 | 0.00 | 0.00 |
| 219378_at   | NARG1L     | NMDA receptor i    | 0.21  | -2.26 | 0.00 | 0.00 |
| 218330_s_at | NAV2       | neuron navigato    | 4.93  | 2.30  | 0.00 | 0.00 |
| 221207_s_at | NBEA       | neurobeachin       | 0.32  | -1.66 | 0.00 | 0.00 |
| 211685_s_at | NCALD      | neurocalcin deltat | 3.27  | 1.71  | 0.00 | 0.00 |
| 209556_at   | NCDN       | neurochondrin      | 5.68  | 2.51  | 0.00 | 0.00 |
| 209557_s_at | NCDN       | neurochondrin      | 5.15  | 2.36  | 0.00 | 0.00 |
| 203315_at   | NCK2       | NCK adaptor prc    | 3.20  | 1.68  | 0.00 | 0.00 |
| 216114_at   | NCKIPSD    | NCK interacting    | 3.18  | 1.67  | 0.00 | 0.00 |
| 205731_s_at | NCOA2      | nuclear receptor   | 0.23  | -2.13 | 0.00 | 0.00 |
| 209062_x_at | NCOA3      | nuclear receptor   | 3.03  | 1.60  | 0.00 | 0.00 |
| 217045_x_at | NCR2       | natural cytotoxic  | 4.30  | 2.11  | 0.00 | 0.00 |
| 217493_x_at | NCR2       | natural cytotoxic  | 3.77  | 1.92  | 0.00 | 0.00 |
| 203245_s_at | NCRNA00094 | non-protein codi   | 3.32  | 1.73  | 0.00 | 0.00 |
| 218160_at   | NDUFA8     | NADH dehydrog      | 4.12  | 2.04  | 0.00 | 0.00 |
| 214241_at   | NDUFB8     | NADH dehydrog      | 0.25  | -1.98 | 0.00 | 0.00 |
| 214657_s_at | NEAT1      | nuclear paraspe    | 0.25  | -1.99 | 0.00 | 0.00 |

|             |          |                    |       |       |      |      |
|-------------|----------|--------------------|-------|-------|------|------|
| 217585_at   | NEBL     | nebulette          | 0.31  | -1.67 | 0.01 | 0.01 |
| 203962_s_at | NEBL     | nebulette          | 0.29  | -1.79 | 0.02 | 0.04 |
| 203961_at   | NEBL     | nebulette          | 0.23  | -2.12 | 0.00 | 0.00 |
| 213012_at   | NEDD4    | neural precursor   | 0.27  | -1.88 | 0.00 | 0.00 |
| 212445_s_at | NEDD4L   | neural precursor   | 3.64  | 1.86  | 0.00 | 0.00 |
| 213116_at   | NEK3     | NIMA (never in r   | 0.19  | -2.37 | 0.00 | 0.00 |
| 204634_at   | NEK4     | NIMA (never in r   | 0.29  | -1.78 | 0.00 | 0.00 |
| 203413_at   | NELL2    | NEL-like 2 (chick  | 12.19 | 3.61  | 0.00 | 0.00 |
| 214125_s_at | NENF     | neuron derived r   | 3.16  | 1.66  | 0.00 | 0.00 |
| 218678_at   | NES      | nestin             | 6.37  | 2.67  | 0.00 | 0.00 |
| 218888_s_at | NETO2    | neuropilin (NRP)   | 6.42  | 2.68  | 0.00 | 0.00 |
| 204889_s_at | NEURL    | neuralized homo    | 5.24  | 2.39  | 0.00 | 0.00 |
| 213438_at   | NFASC    | neurofascin hom    | 0.14  | -2.89 | 0.00 | 0.00 |
| 208196_x_at | NFATC1   | nuclear factor of  | 3.01  | 1.59  | 0.00 | 0.00 |
| 210556_at   | NFATC3   | nuclear factor of  | 0.18  | -2.45 | 0.00 | 0.00 |
| 213033_s_at | NFIB     | nuclear factor I/E | 0.33  | -1.60 | 0.00 | 0.00 |
| 211466_at   | NFIB     | nuclear factor I/E | 0.27  | -1.91 | 0.00 | 0.00 |
| 209289_at   | NFIB     | nuclear factor I/E | 0.17  | -2.54 | 0.00 | 0.00 |
| 213032_at   | NFIB     | nuclear factor I/E | 0.08  | -3.62 | 0.00 | 0.00 |
| 209973_at   | NFKBIL1  | nuclear factor of  | 3.61  | 1.85  | 0.00 | 0.00 |
| 210268_at   | NFX1     | nuclear transcrip  | 0.15  | -2.72 | 0.00 | 0.00 |
| 204109_s_at | NFYA     | nuclear transcrip  | 4.05  | 2.02  | 0.00 | 0.00 |
| 218128_at   | NFYB     | nuclear transcrip  | 0.24  | -2.05 | 0.00 | 0.00 |
| 216263_s_at | NGDN     | neuroguidin, EIF   | 0.21  | -2.26 | 0.00 | 0.00 |
| 215228_at   | NHLH2    | nescient helix lox | 0.15  | -2.70 | 0.00 | 0.00 |
| 219353_at   | NHLRC2   | NHL repeat cont    | 0.13  | -2.96 | 0.00 | 0.00 |
| 202007_at   | NID1     | nidogen 1          | 5.92  | 2.57  | 0.00 | 0.00 |
| 219594_at   | NINJ2    | ninjurin 2         | 3.53  | 1.82  | 0.00 | 0.00 |
| 212129_at   | NIPA2    | non imprinted in   | 3.74  | 1.90  | 0.00 | 0.00 |
| 212483_at   | NIPBL    | Nipped-B homolo    | 0.29  | -1.78 | 0.00 | 0.00 |
| 207108_s_at | NIPBL    | Nipped-B homolo    | 0.23  | -2.12 | 0.00 | 0.00 |
| 205004_at   | NKRF     | NFKB repressing    | 0.27  | -1.88 | 0.00 | 0.00 |
| 215338_s_at | NKTR     | natural killer-tum | 0.26  | -1.96 | 0.00 | 0.00 |
| 206578_at   | NKX2-5   | NK2 transcrip      | 5.15  | 2.37  | 0.00 | 0.00 |
| 221933_at   | NLGN4X   | neuroligin 4, X-li | 5.84  | 2.55  | 0.00 | 0.00 |
| 205204_at   | NMB      | neuromedin B       | 4.87  | 2.28  | 0.00 | 0.00 |
| 215743_at   | NMT2     | N-myristoyltrans   | 0.28  | -1.84 | 0.00 | 0.00 |
| 215069_at   | NMT2     | N-myristoyltrans   | 0.22  | -2.21 | 0.00 | 0.00 |
| 206023_at   | NMU      | neuromedin U       | 0.21  | -2.23 | 0.00 | 0.00 |
| 202237_at   | NNMT     | nicotinamide N-r   | 5.51  | 2.46  | 0.00 | 0.00 |
| 214722_at   | NOTCH2NL | Notch homolog 2    | 0.25  | -2.03 | 0.00 | 0.00 |
| 204501_at   | NOV      | nephroblastoma     | 0.33  | -1.61 | 0.00 | 0.00 |
| 214321_at   | NOV      | nephroblastoma     | 0.18  | -2.52 | 0.00 | 0.00 |
| 201695_s_at | NP       | nucleoside phos    | 5.24  | 2.39  | 0.00 | 0.00 |
| 211584_s_at | NPAT     | nuclear protein, i | 0.32  | -1.63 | 0.00 | 0.00 |
| 221210_s_at | NPL      | N-acetylneurami    | 3.07  | 1.62  | 0.00 | 0.01 |
| 214066_x_at | NPR2     | natriuretic peptid | 0.32  | -1.63 | 0.00 | 0.00 |
| 205440_s_at | NPY1R    | neuropeptide Y r   | 0.08  | -3.61 | 0.00 | 0.00 |

|             |         |                    |      |       |      |      |
|-------------|---------|--------------------|------|-------|------|------|
| 210519_s_at | NQO1    | NAD(P)H dehydi     | 5.46 | 2.45  | 0.00 | 0.00 |
| 201467_s_at | NQO1    | NAD(P)H dehydi     | 3.97 | 1.99  | 0.00 | 0.00 |
| 201468_s_at | NQO1    | NAD(P)H dehydi     | 3.93 | 1.97  | 0.01 | 0.02 |
| 209119_x_at | NR2F2   | nuclear receptor   | 0.13 | -2.96 | 0.00 | 0.00 |
| 205259_at   | NR3C2   | nuclear receptor   | 0.23 | -2.10 | 0.00 | 0.00 |
| 211143_x_at | NR4A1   | nuclear receptor   | 3.79 | 1.92  | 0.00 | 0.00 |
| 210226_at   | NR4A1   | nuclear receptor   | 3.70 | 1.89  | 0.00 | 0.00 |
| 209959_at   | NR4A3   | nuclear receptor   | 4.68 | 2.23  | 0.00 | 0.00 |
| 219557_s_at | NRIP3   | nuclear receptor   | 3.08 | 1.63  | 0.00 | 0.00 |
| 210510_s_at | NRP1    | neuropilin 1       | 3.51 | 1.81  | 0.00 | 0.00 |
| 210841_s_at | NRP2    | neuropilin 2       | 3.71 | 1.89  | 0.00 | 0.00 |
| 210683_at   | NRTN    | neurturin          | 0.28 | -1.84 | 0.00 | 0.00 |
| 209279_s_at | NSDHL   | NAD(P) dependt     | 4.85 | 2.28  | 0.00 | 0.00 |
| 219067_s_at | NSMCE4A | non-SMC eleme      | 0.27 | -1.90 | 0.00 | 0.00 |
| 222128_at   | NSUN6   | NOL1/NOP2/Sur      | 0.16 | -2.68 | 0.00 | 0.00 |
| 222020_s_at | NTM     | neurotrimin        | 0.33 | -1.62 | 0.00 | 0.00 |
| 221796_at   | NTRK2   | neurotrophic tyrc  | 0.28 | -1.82 | 0.01 | 0.02 |
| 203978_at   | NUBP1   | nucleotide bindir  | 3.44 | 1.78  | 0.00 | 0.00 |
| 214136_at   | NUDT13  | nudix (nucleosid   | 0.10 | -3.36 | 0.00 | 0.00 |
| 213461_at   | NUDT21  | nudix (nucleosid   | 0.23 | -2.13 | 0.00 | 0.00 |
| 220183_s_at | NUDT6   | nudix (nucleosid   | 0.22 | -2.16 | 0.00 | 0.00 |
| 205134_s_at | NUFIP1  | nuclear fragile X  | 0.23 | -2.11 | 0.00 | 0.00 |
| 214250_at   | NUMA1   | nuclear mitotic a  | 0.27 | -1.91 | 0.01 | 0.01 |
| 207545_s_at | NUMB    | numb homolog (     | 0.25 | -2.03 | 0.00 | 0.00 |
| 212709_at   | NUP160  | nucleoporin 160l   | 0.27 | -1.89 | 0.00 | 0.00 |
| 218294_s_at | NUP50   | nucleoporin 50kI   | 0.23 | -2.13 | 0.00 | 0.00 |
| 220520_s_at | NUP62CL | nucleoporin 62kI   | 0.30 | -1.74 | 0.00 | 0.00 |
| 209230_s_at | NUPR1   | nuclear protein, 1 | 0.28 | -1.86 | 0.00 | 0.00 |
| 202869_at   | OAS1    | 2',5'-oligoadenyl: | 6.79 | 2.76  | 0.00 | 0.00 |
| 205552_s_at | OAS1    | 2',5'-oligoadenyl: | 4.97 | 2.31  | 0.00 | 0.00 |
| 204972_at   | OAS2    | 2'-5'-oligoadenyl: | 3.79 | 1.92  | 0.00 | 0.00 |
| 205660_at   | OASL    | 2'-5'-oligoadenyl: | 8.43 | 3.08  | 0.00 | 0.00 |
| 210797_s_at | OASL    | 2'-5'-oligoadenyl: | 5.93 | 2.57  | 0.00 | 0.00 |
| 201364_s_at | OAZ2    | ornithine decarbi  | 4.70 | 2.23  | 0.00 | 0.00 |
| 219100_at   | OBFC1   | oligonucleotide/c  | 4.32 | 2.11  | 0.00 | 0.00 |
| 220848_x_at | OBP2A   | odorant binding    | 3.93 | 1.98  | 0.00 | 0.00 |
| 200790_at   | ODC1    | ornithine decarbi  | 5.27 | 2.40  | 0.00 | 0.00 |
| 44617_at    | OGFOD2  | 2-oxoglutarate a   | 5.05 | 2.34  | 0.00 | 0.00 |
| 219246_s_at | OGFOD2  | 2-oxoglutarate a   | 0.33 | -1.59 | 0.00 | 0.00 |
| 204853_at   | ORC2L   | origin recognitior | 0.29 | -1.78 | 0.00 | 0.00 |
| 211212_s_at | ORC5L   | origin recognitior | 0.29 | -1.80 | 0.00 | 0.00 |
| 209221_s_at | OSBPL2  | oxysterol binding  | 0.33 | -1.59 | 0.00 | 0.00 |
| 212582_at   | OSBPL8  | oxysterol binding  | 0.31 | -1.72 | 0.00 | 0.00 |
| 213568_at   | OSR2    | odd-skipped rela   | 6.60 | 2.72  | 0.00 | 0.00 |
| 38710_at    | OTUB1   | OTU domain, ub     | 3.79 | 1.92  | 0.00 | 0.00 |
| 206604_at   | OVOL1   | ovo-like 1(Droso   | 3.33 | 1.73  | 0.00 | 0.00 |
| 202780_at   | OXCT1   | 3-oxoacid CoA tr   | 0.26 | -1.92 | 0.00 | 0.00 |
| 218197_s_at | OXR1    | oxidation resista  | 0.25 | -1.98 | 0.00 | 0.00 |

|             |         |                    |      |       |      |      |
|-------------|---------|--------------------|------|-------|------|------|
| 207091_at   | P2RX7   | purinergic recept  | 0.33 | -1.62 | 0.00 | 0.00 |
| 206637_at   | P2RY14  | purinergic recept  | 0.22 | -2.17 | 0.00 | 0.00 |
| 214794_at   | PA2G4   | proliferation-ass  | 0.28 | -1.84 | 0.00 | 0.00 |
| 213754_s_at | PAIP1   | poly(A) binding f  | 0.32 | -1.64 | 0.00 | 0.00 |
| 221868_at   | PAIP2B  | poly(A) binding f  | 0.21 | -2.24 | 0.00 | 0.00 |
| 208876_s_at | PAK2    | p21 protein (Cdc   | 0.20 | -2.34 | 0.00 | 0.00 |
| 200906_s_at | PALLD   | palladin, cytoske  | 5.43 | 2.44  | 0.00 | 0.00 |
| 200907_s_at | PALLD   | palladin, cytoske  | 3.52 | 1.81  | 0.00 | 0.00 |
| 200897_s_at | PALLD   | palladin, cytoske  | 3.20 | 1.68  | 0.00 | 0.00 |
| 212958_x_at | PAM     | peptidylglycine a  | 5.12 | 2.36  | 0.00 | 0.00 |
| 202336_s_at | PAM     | peptidylglycine a  | 4.72 | 2.24  | 0.00 | 0.00 |
| 213661_at   | PAMR1   | peptidase domai    | 0.22 | -2.20 | 0.02 | 0.03 |
| 221941_at   | PAOX    | polyamine oxida    | 3.20 | 1.68  | 0.00 | 0.00 |
| 212720_at   | PAPOLA  | poly(A) polymera   | 0.28 | -1.86 | 0.00 | 0.00 |
| 215374_at   | PAPOLA  | poly(A) polymera   | 0.27 | -1.92 | 0.00 | 0.00 |
| 221527_s_at | PARD3   | par-3 partitioning | 0.31 | -1.68 | 0.00 | 0.00 |
| 205245_at   | PARD6A  | par-6 partitioning | 3.85 | 1.94  | 0.00 | 0.00 |
| 218543_s_at | PARP12  | poly (ADP-ribose   | 3.09 | 1.63  | 0.00 | 0.00 |
| 217890_s_at | PARVA   | parvin, alpha      | 3.40 | 1.77  | 0.00 | 0.00 |
| 214237_x_at | PAWR    | PRKC, apoptosis    | 4.10 | 2.04  | 0.00 | 0.00 |
| 205646_s_at | PAX6    | paired box 6       | 3.20 | 1.68  | 0.00 | 0.00 |
| 121_at      | PAX8    | paired box 8       | 5.93 | 2.57  | 0.00 | 0.00 |
| 219543_at   | PBLD    | phenazine biosy    | 0.31 | -1.68 | 0.00 | 0.00 |
| 202876_s_at | PBX2    | pre-B-cell leuker  | 0.20 | -2.35 | 0.00 | 0.00 |
| 212259_s_at | PBXIP1  | pre-B-cell leuker  | 3.28 | 1.71  | 0.00 | 0.00 |
| 204476_s_at | PC      | pyruvate carboxy   | 3.11 | 1.63  | 0.00 | 0.00 |
| 213264_at   | PCBP2   | poly(rC) binding   | 0.31 | -1.70 | 0.00 | 0.00 |
| 213517_at   | PCBP2   | poly(rC) binding   | 0.21 | -2.23 | 0.00 | 0.00 |
| 203860_at   | PCCA    | propionyl Coenz    | 0.29 | -1.77 | 0.00 | 0.00 |
| 213369_at   | PCDH21  | protocadherin 21   | 0.08 | -3.73 | 0.00 | 0.00 |
| 220186_s_at | PCDH24  | protocadherin 24   | 4.56 | 2.19  | 0.00 | 0.00 |
| 208504_x_at | PCDHB11 | protocadherin be   | 3.63 | 1.86  | 0.00 | 0.00 |
| 210368_at   | PCDHGA8 | protocadherin ge   | 0.29 | -1.79 | 0.00 | 0.00 |
| 203378_at   | PCF11   | PCF11, cleavag     | 0.13 | -2.90 | 0.00 | 0.00 |
| 203792_x_at | PCGF2   | polycomb group     | 3.79 | 1.92  | 0.00 | 0.00 |
| 213558_at   | PCLO    | piccolo (presyna   | 0.26 | -1.94 | 0.00 | 0.00 |
| 212406_s_at | PCMTD2  | protein-L-isoasp   | 0.26 | -1.97 | 0.00 | 0.00 |
| 205560_at   | PCSK5   | proprotein conve   | 0.25 | -2.00 | 0.00 | 0.00 |
| 205559_s_at | PCSK5   | proprotein conve   | 0.22 | -2.20 | 0.00 | 0.00 |
| 210553_x_at | PCSK6   | proprotein conve   | 3.14 | 1.65  | 0.00 | 0.00 |
| 207239_s_at | PCTK1   | PCTAIRE protei     | 3.10 | 1.63  | 0.00 | 0.00 |
| 212594_at   | PDCD4   | programmed cel     | 0.27 | -1.90 | 0.00 | 0.00 |
| 222381_at   | PDCD6   | programmed cel     | 3.09 | 1.63  | 0.00 | 0.00 |
| 204134_at   | PDE2A   | phosphodiestera    | 3.67 | 1.88  | 0.00 | 0.00 |
| 209700_x_at | PDE4DIP | phosphodiestera    | 0.21 | -2.27 | 0.00 | 0.00 |
| 213388_at   | PDE4DIP | phosphodiestera    | 0.17 | -2.56 | 0.00 | 0.00 |
| 216867_s_at | PDGFA   | platelet-derived f | 3.15 | 1.66  | 0.00 | 0.00 |
| 221957_at   | PDK3    | pyruvate dehydr    | 7.35 | 2.88  | 0.00 | 0.00 |

|             |          |                     |        |       |      |      |
|-------------|----------|---------------------|--------|-------|------|------|
| 206348_s_at | PDK3     | pyruvate dehydr     | 3.18   | 1.67  | 0.00 | 0.00 |
| 218690_at   | PDLIM4   | PDZ and LIM do      | 4.66   | 2.22  | 0.00 | 0.00 |
| 203242_s_at | PDLIM5   | PDZ and LIM do      | 0.30   | -1.76 | 0.00 | 0.00 |
| 213684_s_at | PDLIM5   | PDZ and LIM do      | 0.18   | -2.52 | 0.00 | 0.00 |
| 32029_at    | PDPK1    | 3-phosphoinositi    | 3.86   | 1.95  | 0.00 | 0.00 |
| 204742_s_at | PDS5B    | PDS5, regulator     | 0.29   | -1.80 | 0.00 | 0.00 |
| 215888_at   | PDS5B    | PDS5, regulator     | 0.25   | -2.01 | 0.00 | 0.00 |
| 221992_at   | PDXDC2   | pyridoxal-depen     | 0.27   | -1.87 | 0.00 | 0.00 |
| 202671_s_at | PDXK     | pyridoxal (pyrido   | 3.18   | 1.67  | 0.00 | 0.00 |
| 209493_at   | PDZD2    | PDZ domain con      | 0.21   | -2.28 | 0.00 | 0.00 |
| 219630_at   | PDZK1IP1 | PDZK1 interactir    | 4.12   | 2.04  | 0.00 | 0.00 |
| 208982_at   | PECAM1   | platelet/endothel   | 3.76   | 1.91  | 0.00 | 0.00 |
| 209242_at   | PEG3     | paternally expres   | 0.13   | -2.94 | 0.00 | 0.00 |
| 219132_at   | PELI2    | pellino homolog     | 0.22   | -2.16 | 0.00 | 0.00 |
| 205251_at   | PER2     | period homolog :    | 0.31   | -1.69 | 0.00 | 0.00 |
| 204300_at   | PET112L  | PET112-like (ye     | 3.45   | 1.79  | 0.00 | 0.00 |
| 215023_s_at | PEX1     | peroxisomal bioç    | 0.26   | -1.95 | 0.00 | 0.00 |
| 204873_at   | PEX1     | peroxisomal bioç    | 0.09   | -3.47 | 0.00 | 0.00 |
| 201706_s_at | PEX19    | peroxisomal bioç    | 7.57   | 2.92  | 0.00 | 0.00 |
| 203969_at   | PEX3     | peroxisomal bioç    | 0.10   | -3.33 | 0.00 | 0.00 |
| 206390_x_at | PF4      | platelet factor 4   | 3.39   | 1.76  | 0.00 | 0.00 |
| 207931_s_at | PFKFB2   | 6-phosphofructo     | 3.53   | 1.82  | 0.00 | 0.00 |
| 204992_s_at | PFN2     | profilin 2          | 4.11   | 2.04  | 0.00 | 0.00 |
| 213469_at   | PGAP1    | post-GPI attachr    | 0.11   | -3.15 | 0.00 | 0.00 |
| 220576_at   | PGAP1    | post-GPI attachr    | 0.08   | -3.67 | 0.00 | 0.00 |
| 219225_at   | PGBD5    | piggyBac transp     | 12.81  | 3.68  | 0.00 | 0.00 |
| 201118_at   | PGD      | phosphoglucona      | 5.04   | 2.33  | 0.00 | 0.00 |
| 209652_s_at | PGF      | placental growth    | 3.76   | 1.91  | 0.00 | 0.00 |
| 218410_s_at | PGP      | phosphoglycolat     | 3.76   | 1.91  | 0.00 | 0.00 |
| 204048_s_at | PHACTR2  | phosphatase an      | 3.43   | 1.78  | 0.00 | 0.00 |
| 218338_at   | PHC1     | polyhomeotic ho     | 3.11   | 1.64  | 0.00 | 0.00 |
| 217951_s_at | PHF3     | PHD finger prote    | 0.15   | -2.79 | 0.00 | 0.00 |
| 215718_s_at | PHF3     | PHD finger prote    | 0.14   | -2.89 | 0.00 | 0.00 |
| 205450_at   | PHKA1    | phosphorylase k     | 4.02   | 2.01  | 0.00 | 0.00 |
| 217996_at   | PHLDA1   | pleckstrin homol    | 4.05   | 2.02  | 0.00 | 0.00 |
| 217997_at   | PHLDA1   | pleckstrin homol    | 3.02   | 1.59  | 0.02 | 0.04 |
| 216102_at   | PHLDB1   | pleckstrin homol    | 5.39   | 2.43  | 0.00 | 0.00 |
| 41469_at    | PI3      | peptidase inhibit   | 112.18 | 6.81  | 0.00 | 0.00 |
| 203691_at   | PI3      | peptidase inhibit   | 100.96 | 6.66  | 0.00 | 0.00 |
| 209346_s_at | PI4K2A   | phosphatidylinos    | 3.36   | 1.75  | 0.00 | 0.00 |
| 214442_s_at | PIAS2    | protein inhibitor ( | 3.79   | 1.92  | 0.00 | 0.00 |
| 37433_at    | PIAS2    | protein inhibitor ( | 0.12   | -3.12 | 0.00 | 0.00 |
| 213239_at   | PIBF1    | progesterone im     | 0.15   | -2.73 | 0.00 | 0.00 |
| 213889_at   | PIGL     | phosphatidylinos    | 0.31   | -1.71 | 0.00 | 0.00 |
| 215129_at   | PIK3C2G  | phosphoinositide    | 0.28   | -1.86 | 0.00 | 0.00 |
| 204369_at   | PIK3CA   | phosphoinositide    | 0.17   | -2.56 | 0.00 | 0.00 |
| 217620_s_at | PIK3CB   | phosphoinositide    | 0.12   | -3.02 | 0.00 | 0.00 |
| 221757_at   | PIK3IP1  | phosphoinositide    | 3.77   | 1.92  | 0.00 | 0.00 |



|             |         |                    |       |       |      |      |
|-------------|---------|--------------------|-------|-------|------|------|
| 213111_at   | PIKFYVE | phosphoinositide   | 0.30  | -1.73 | 0.00 | 0.00 |
| 222218_s_at | PILRA   | paired immunogl    | 0.23  | -2.10 | 0.00 | 0.00 |
| 220954_s_at | PILRB   | paired immunogl    | 0.33  | -1.59 | 0.00 | 0.00 |
| 222150_s_at | PION    | pigeon homolog     | 0.24  | -2.03 | 0.00 | 0.00 |
| 213142_x_at | PION    | pigeon homolog     | 0.22  | -2.19 | 0.00 | 0.00 |
| 205632_s_at | PIP5K1B | phosphatidylinos   | 0.23  | -2.14 | 0.00 | 0.00 |
| 219155_at   | PITPNC1 | phosphatidylinos   | 4.90  | 2.29  | 0.00 | 0.00 |
| 209587_at   | PITX1   | paired-like home   | 11.90 | 3.57  | 0.00 | 0.00 |
| 208502_s_at | PITX1   | paired-like home   | 7.35  | 2.88  | 0.00 | 0.00 |
| 218667_at   | PJA1    | praja ring finger  | 4.01  | 2.00  | 0.00 | 0.00 |
| 203688_at   | PKD2    | polycystic kidney  | 0.32  | -1.63 | 0.00 | 0.00 |
| 221061_at   | PKD2L1  | polycystic kidney  | 5.89  | 2.56  | 0.00 | 0.00 |
| 212629_s_at | PKN2    | protein kinase N.  | 0.31  | -1.70 | 0.00 | 0.00 |
| 205724_at   | PKP1    | plakophilin 1 (ec  | 5.42  | 2.44  | 0.00 | 0.00 |
| 214874_at   | PKP4    | plakophilin 4      | 0.29  | -1.79 | 0.00 | 0.00 |
| 209318_x_at | PLAGL1  | pleiomorphic adt   | 0.10  | -3.33 | 0.00 | 0.00 |
| 207943_x_at | PLAGL1  | pleiomorphic adt   | 0.08  | -3.67 | 0.00 | 0.00 |
| 207002_s_at | PLAGL1  | pleiomorphic adt   | 0.07  | -3.87 | 0.00 | 0.00 |
| 211924_s_at | PLAUR   | plasminogen act    | 3.75  | 1.91  | 0.00 | 0.00 |
| 210845_s_at | PLAUR   | plasminogen act    | 3.02  | 1.60  | 0.00 | 0.00 |
| 219011_at   | PLEKHA4 | pleckstrin homol   | 5.84  | 2.55  | 0.00 | 0.00 |
| 219566_at   | PLEKHF1 | pleckstrin homol   | 7.95  | 2.99  | 0.00 | 0.00 |
| 204436_at   | PLEKHO2 | pleckstrin homol   | 3.52  | 1.82  | 0.00 | 0.00 |
| 204886_at   | PLK4    | polo-like kinase   | 0.23  | -2.13 | 0.00 | 0.00 |
| 204519_s_at | PLLP    | plasma membrai     | 0.16  | -2.61 | 0.00 | 0.00 |
| 205190_at   | PLS1    | plastin 1 (I isofo | 0.22  | -2.21 | 0.00 | 0.00 |
| 202446_s_at | PLSCR1  | phospholipid scr   | 3.05  | 1.61  | 0.00 | 0.00 |
| 56197_at    | PLSCR3  | phospholipid scr   | 5.37  | 2.43  | 0.00 | 0.00 |
| 218828_at   | PLSCR3  | phospholipid scr   | 3.03  | 1.60  | 0.00 | 0.00 |
| 210139_s_at | PMP22   | peripheral myelir  | 0.26  | -1.96 | 0.00 | 0.00 |
| 179_at      | PMS2L11 | postmeiotic segr   | 12.27 | 3.62  | 0.00 | 0.00 |
| 212036_s_at | PNN     | pinin, desmosorr   | 0.18  | -2.47 | 0.00 | 0.00 |
| 39854_r_at  | PNPLA2  | patatin-like phos  | 7.57  | 2.92  | 0.00 | 0.00 |
| 220675_s_at | PNPLA3  | patatin-like phos  | 0.21  | -2.25 | 0.00 | 0.00 |
| 219756_s_at | POF1B   | premature ovaric   | 0.11  | -3.18 | 0.00 | 0.00 |
| 215281_x_at | POGZ    | pogo transposat    | 0.29  | -1.80 | 0.00 | 0.00 |
| 214226_at   | POL3S   | polyserase 3       | 3.16  | 1.66  | 0.00 | 0.00 |
| 202306_at   | POLR2G  | polymerase (RN.    | 3.64  | 1.87  | 0.00 | 0.00 |
| 60815_at    | POLR2J4 | polymerase (RN.    | 0.11  | -3.22 | 0.00 | 0.00 |
| 218866_s_at | POLR3K  | polymerase (RN.    | 3.13  | 1.65  | 0.00 | 0.00 |
| 220632_s_at | POMT2   | protein-O-mannc    | 3.35  | 1.74  | 0.00 | 0.00 |
| 214981_at   | POSTN   | periostin, osteob  | 0.14  | -2.82 | 0.00 | 0.00 |
| 210809_s_at | POSTN   | periostin, osteob  | 0.10  | -3.34 | 0.00 | 0.00 |
| 211660_at   | POU2F2  | POU class 2 hor    | 3.08  | 1.62  | 0.00 | 0.00 |
| 215355_at   | POU2F3  | POU class 2 hor    | 0.09  | -3.50 | 0.00 | 0.00 |
| 207109_at   | POU2F3  | POU class 2 hor    | 0.08  | -3.66 | 0.00 | 0.00 |
| 208345_s_at | POU3F1  | POU class 3 hor    | 0.32  | -1.63 | 0.00 | 0.00 |
| 216332_at   | POU6F1  | POU class 6 hor    | 3.29  | 1.72  | 0.00 | 0.00 |

|             |          |                    |      |       |      |      |
|-------------|----------|--------------------|------|-------|------|------|
| 210771_at   | PPARA    | peroxisome proli   | 0.33 | -1.59 | 0.00 | 0.00 |
| 219195_at   | PPARGC1A | peroxisome proli   | 0.15 | -2.76 | 0.00 | 0.00 |
| 209433_s_at | PPAT     | phosphoribosyl ç   | 0.25 | -2.02 | 0.00 | 0.00 |
| 214374_s_at | PPFIBP1  | PTPRF interactir   | 0.14 | -2.80 | 0.00 | 0.00 |
| 217602_at   | PPIA     | peptidylprolyl iso | 0.06 | -4.09 | 0.00 | 0.00 |
| 204517_at   | PPIC     | peptidylprolyl iso | 3.17 | 1.66  | 0.00 | 0.00 |
| 201490_s_at | PPIF     | peptidylprolyl iso | 3.18 | 1.67  | 0.00 | 0.00 |
| 204788_s_at | PPOX     | protoporphyrinoç   | 0.31 | -1.70 | 0.00 | 0.00 |
| 201604_s_at | PPP1R12A | protein phosphai   | 0.32 | -1.63 | 0.00 | 0.00 |
| 201603_at   | PPP1R12A | protein phosphai   | 0.32 | -1.64 | 0.00 | 0.00 |
| 202165_at   | PPP1R2   | protein phosphai   | 0.33 | -1.60 | 0.00 | 0.00 |
| 204284_at   | PPP1R3C  | protein phosphai   | 5.07 | 2.34  | 0.00 | 0.00 |
| 209632_at   | PPP2R3A  | protein phosphai   | 0.24 | -2.04 | 0.00 | 0.00 |
| 204506_at   | PPP3R1   | protein phosphai   | 3.02 | 1.60  | 0.00 | 0.00 |
| 215705_at   | PPP5C    | protein phosphai   | 3.55 | 1.83  | 0.00 | 0.00 |
| 209826_at   | PPT2     | palmitoyl-protein  | 0.28 | -1.86 | 0.00 | 0.00 |
| 213483_at   | PPWD1    | peptidylprolyl iso | 0.24 | -2.05 | 0.00 | 0.00 |
| 216458_at   | PQLC3    | PQ loop repeat c   | 3.63 | 1.86  | 0.00 | 0.00 |
| 211531_x_at | PRB1     | proline-rich prote | 6.06 | 2.60  | 0.00 | 0.00 |
| 210597_x_at | PRB1     | proline-rich prote | 3.18 | 1.67  | 0.00 | 0.00 |
| 37022_at    | PRELP    | proline/arginine-i | 0.31 | -1.71 | 0.00 | 0.00 |
| 205628_at   | PRIM2    | primase, DNA, p    | 0.25 | -2.03 | 0.00 | 0.00 |
| 214917_at   | PRKAA1   | protein kinase, A  | 0.21 | -2.26 | 0.00 | 0.00 |
| 200604_s_at | PRKAR1A  | protein kinase, c  | 6.18 | 2.63  | 0.00 | 0.00 |
| 204843_s_at | PRKAR2A  | protein kinase, c  | 3.64 | 1.86  | 0.00 | 0.00 |
| 203680_at   | PRKAR2B  | protein kinase, c  | 0.31 | -1.70 | 0.00 | 0.00 |
| 213093_at   | PRKCA    | protein kinase C   | 0.24 | -2.04 | 0.00 | 0.00 |
| 209685_s_at | PRKCB    | protein kinase C   | 0.11 | -3.13 | 0.00 | 0.00 |
| 207957_s_at | PRKCB    | protein kinase C   | 0.11 | -3.21 | 0.00 | 0.00 |
| 211084_x_at | PRKD3    | protein kinase D   | 0.31 | -1.68 | 0.00 | 0.00 |
| 218236_s_at | PRKD3    | protein kinase D   | 0.19 | -2.41 | 0.00 | 0.00 |
| 210476_s_at | PRLR     | prolactin recepto  | 4.47 | 2.16  | 0.00 | 0.00 |
| 206445_s_at | PRMT1    | protein arginine i | 3.75 | 1.91  | 0.00 | 0.00 |
| 214203_s_at | PRODH    | proline dehydrog   | 0.21 | -2.24 | 0.00 | 0.00 |
| 220553_s_at | PRPF39   | PRP39 pre-mRN      | 0.13 | -2.93 | 0.00 | 0.00 |
| 214941_s_at | PRPF40A  | PRP40 pre-mRN      | 6.74 | 2.75  | 0.00 | 0.00 |
| 202127_at   | PRPF4B   | PRP4 pre-mRN/      | 0.29 | -1.81 | 0.00 | 0.00 |
| 211090_s_at | PRPF4B   | PRP4 pre-mRN/      | 0.22 | -2.19 | 0.00 | 0.00 |
| 205402_x_at | PRSS2    | protease, serine,  | 5.88 | 2.56  | 0.00 | 0.00 |
| 202458_at   | PRSS23   | protease, serine,  | 8.48 | 3.08  | 0.00 | 0.00 |
| 200866_s_at | PSAP     | prosaposin         | 3.08 | 1.62  | 0.00 | 0.00 |
| 205961_s_at | PSIP1    | PC4 and SFRS1      | 0.29 | -1.77 | 0.00 | 0.00 |
| 209337_at   | PSIP1    | PC4 and SFRS1      | 0.20 | -2.31 | 0.00 | 0.00 |
| 201274_at   | PSMA5    | proteasome (pro    | 3.70 | 1.89  | 0.00 | 0.00 |
| 204279_at   | PSMB9    | proteasome (pro    | 3.38 | 1.76  | 0.00 | 0.00 |
| 209853_s_at | PSME3    | proteasome (pro    | 4.40 | 2.14  | 0.00 | 0.00 |
| 200987_x_at | PSME3    | proteasome (pro    | 3.74 | 1.90  | 0.00 | 0.00 |
| 205048_s_at | PSPH     | phosphoserine p    | 0.07 | -3.86 | 0.00 | 0.00 |

|             |           |                              |      |       |      |      |
|-------------|-----------|------------------------------|------|-------|------|------|
| 219658_at   | PTCD2     | pentatricopeptid             | 0.19 | -2.40 | 0.00 | 0.00 |
| 211837_s_at | PTCRA     | pre T-cell antigen           | 3.35 | 1.75  | 0.00 | 0.00 |
| 218967_s_at | PTER      | phosphotriester              | 0.11 | -3.15 | 0.00 | 0.00 |
| 211748_x_at | PTGDS     | prostaglandin D <sub>2</sub> | 3.63 | 1.86  | 0.00 | 0.00 |
| 214391_x_at | PTGER1    | prostaglandin E <sub>1</sub> | 7.50 | 2.91  | 0.00 | 0.00 |
| 207650_x_at | PTGER1    | prostaglandin E <sub>1</sub> | 4.27 | 2.09  | 0.00 | 0.00 |
| 210833_at   | PTGER3    | prostaglandin E <sub>1</sub> | 0.28 | -1.82 | 0.00 | 0.00 |
| 210375_at   | PTGER3    | prostaglandin E <sub>1</sub> | 0.27 | -1.88 | 0.00 | 0.00 |
| 211909_x_at | PTGER3    | prostaglandin E <sub>1</sub> | 0.26 | -1.93 | 0.00 | 0.00 |
| 210374_x_at | PTGER3    | prostaglandin E <sub>1</sub> | 0.19 | -2.38 | 0.00 | 0.00 |
| 210832_x_at | PTGER3    | prostaglandin E <sub>1</sub> | 0.15 | -2.71 | 0.00 | 0.00 |
| 205911_at   | PTH1R     | parathyroid horr             | 0.18 | -2.50 | 0.00 | 0.00 |
| 206482_at   | PTK6      | PTK6 protein tyr             | 0.29 | -1.78 | 0.00 | 0.00 |
| 200772_x_at | PTMA      | prothymosin, alp             | 0.30 | -1.72 | 0.00 | 0.00 |
| 204201_s_at | PTPN13    | protein tyrosine j           | 0.17 | -2.57 | 0.00 | 0.00 |
| 203997_at   | PTPN3     | protein tyrosine j           | 0.31 | -1.68 | 0.00 | 0.00 |
| 206687_s_at | PTPN6     | protein tyrosine j           | 0.31 | -1.70 | 0.00 | 0.00 |
| 204960_at   | PTPRCAP   | protein tyrosine j           | 3.07 | 1.62  | 0.00 | 0.00 |
| 215066_at   | PTPRF     | protein tyrosine j           | 0.24 | -2.05 | 0.00 | 0.00 |
| 203029_s_at | PTPRN2    | protein tyrosine j           | 3.84 | 1.94  | 0.00 | 0.00 |
| 211320_s_at | PTPRU     | protein tyrosine j           | 3.85 | 1.94  | 0.00 | 0.00 |
| 212012_at   | PXDN      | peroxidasin hom              | 9.17 | 3.20  | 0.00 | 0.00 |
| 212013_at   | PXDN      | peroxidasin hom              | 7.02 | 2.81  | 0.00 | 0.00 |
| 218944_at   | PYCR1     | pyrroline-5-carbc            | 3.94 | 1.98  | 0.00 | 0.00 |
| 209123_at   | QDPR      | quinoid dihydrop             | 3.35 | 1.75  | 0.00 | 0.00 |
| 212263_at   | QKI       | quaking homolog              | 0.21 | -2.29 | 0.00 | 0.00 |
| 204157_s_at | QSK       | serine/threonine-            | 3.27 | 1.71  | 0.00 | 0.00 |
| 201482_at   | QSOX1     | quiescin Q6 sulfi            | 4.46 | 2.16  | 0.00 | 0.00 |
| 214999_s_at | RAB11FIP3 | RAB11 family int             | 0.15 | -2.74 | 0.00 | 0.00 |
| 200928_s_at | RAB14     | RAB14, member                | 0.31 | -1.68 | 0.00 | 0.00 |
| 211503_s_at | RAB14     | RAB14, member                | 0.21 | -2.26 | 0.00 | 0.00 |
| 219622_at   | RAB20     | RAB20, member                | 4.37 | 2.13  | 0.00 | 0.00 |
| 208733_at   | RAB2A     | RAB2A, membe                 | 0.25 | -2.02 | 0.00 | 0.00 |
| 217764_s_at | RAB31     | RAB31, member                | 5.48 | 2.45  | 0.00 | 0.00 |
| 217763_s_at | RAB31     | RAB31, member                | 3.09 | 1.63  | 0.00 | 0.00 |
| 204214_s_at | RAB32     | RAB32, member                | 4.54 | 2.18  | 0.00 | 0.00 |
| 221014_s_at | RAB33B    | RAB33B, membe                | 0.16 | -2.66 | 0.00 | 0.00 |
| 217597_x_at | RAB40B    | RAB40B, membe                | 3.36 | 1.75  | 0.00 | 0.00 |
| 213466_at   | RAB40C    | RAB40C, memb                 | 5.38 | 2.43  | 0.00 | 0.00 |
| 203136_at   | RABAC1    | Rab acceptor 1 (             | 3.01 | 1.59  | 0.00 | 0.00 |
| 213704_at   | RABGGTB   | Rab geranylgera              | 0.32 | -1.63 | 0.00 | 0.00 |
| 204478_s_at | RABIF     | RAB interacting              | 3.60 | 1.85  | 0.00 | 0.00 |
| 213603_s_at | RAC2      | ras-related C3 br            | 4.17 | 2.06  | 0.00 | 0.00 |
| 205647_at   | RAD52     | RAD52 homolog                | 0.25 | -2.00 | 0.00 | 0.00 |
| 202052_s_at | RAI14     | retinoic acid indu           | 0.20 | -2.36 | 0.00 | 0.00 |
| 209051_s_at | RALGDS    | ral guanine nucl             | 3.37 | 1.75  | 0.00 | 0.00 |
| 209050_s_at | RALGDS    | ral guanine nucl             | 0.19 | -2.36 | 0.00 | 0.00 |
| 204199_at   | RALGPS1   | Ral GEF with Pf              | 0.22 | -2.22 | 0.00 | 0.00 |

|             |          |                        |       |       |      |      |
|-------------|----------|------------------------|-------|-------|------|------|
| 220338_at   | RALGPS2  | Ral GEF with PI        | 0.23  | -2.15 | 0.00 | 0.00 |
| 202639_s_at | RANBP3   | RAN binding pro        | 3.63  | 1.86  | 0.00 | 0.00 |
| 212125_at   | RANGAP1  | Ran GTPase act         | 3.55  | 1.83  | 0.00 | 0.00 |
| 215992_s_at | RAPGEF2  | Rap guanine nuc        | 0.06  | -4.02 | 0.00 | 0.00 |
| 210051_at   | RAPGEF3  | Rap guanine nuc        | 3.28  | 1.71  | 0.00 | 0.00 |
| 205651_x_at | RAPGEF4  | Rap guanine nuc        | 0.20  | -2.32 | 0.00 | 0.00 |
| 218657_at   | RAPGEFL1 | Rap guanine nuc        | 0.22  | -2.16 | 0.00 | 0.00 |
| 204189_at   | RARG     | retinoic acid rece     | 3.07  | 1.62  | 0.00 | 0.00 |
| 212706_at   | RASA4    | RAS p21 protein        | 0.18  | -2.47 | 0.00 | 0.00 |
| 214369_s_at | RASGRP2  | RAS guanyl rele        | 0.19  | -2.44 | 0.00 | 0.00 |
| 220027_s_at | RASIP1   | Ras interacting p      | 3.68  | 1.88  | 0.00 | 0.00 |
| 202034_x_at | RB1CC1   | RB1-inducible cc       | 0.23  | -2.13 | 0.00 | 0.00 |
| 219222_at   | RBKS     | ribokinase             | 6.21  | 2.64  | 0.00 | 0.00 |
| 205296_at   | RBL1     | retinoblastoma-li      | 0.29  | -1.77 | 0.00 | 0.00 |
| 212331_at   | RBL2     | retinoblastoma-li      | 0.23  | -2.12 | 0.00 | 0.00 |
| 51228_at    | RBM12B   | RNA binding mo         | 0.22  | -2.20 | 0.00 | 0.00 |
| 200997_at   | RBM4     | RNA binding mo         | 3.48  | 1.80  | 0.00 | 0.00 |
| 219754_at   | RBM41    | RNA binding mo         | 0.24  | -2.07 | 0.00 | 0.00 |
| 209936_at   | RBM5     | RNA binding mo         | 0.33  | -1.62 | 0.00 | 0.00 |
| 217856_at   | RBM8A    | RNA binding mo         | 0.17  | -2.60 | 0.00 | 0.00 |
| 209487_at   | RBPM5    | RNA binding pro        | 4.99  | 2.32  | 0.00 | 0.00 |
| 203498_at   | RCAN2    | regulator of calci     | 0.26  | -1.92 | 0.00 | 0.00 |
| 218352_at   | RCBTB1   | regulator of chro      | 0.14  | -2.88 | 0.00 | 0.00 |
| 205332_at   | RCE1     | RCE1 homolog,          | 3.21  | 1.68  | 0.00 | 0.00 |
| 212612_at   | RCOR1    | REST corepress         | 0.31  | -1.71 | 0.00 | 0.00 |
| 206753_at   | RDH16    | retinol dehydrog       | 5.74  | 2.52  | 0.00 | 0.00 |
| 212917_x_at | RECQL    | RecQ protein-lik       | 0.31  | -1.67 | 0.00 | 0.00 |
| 204365_s_at | REEP1    | receptor access        | 3.85  | 1.95  | 0.00 | 0.00 |
| 205205_at   | RELB     | v-rel reticuloend      | 3.50  | 1.81  | 0.00 | 0.00 |
| 215201_at   | REPS1    | RALBP1 associ          | 0.23  | -2.12 | 0.00 | 0.00 |
| 214409_at   | RFPL3S   | RFPL3 antisens         | 0.30  | -1.72 | 0.00 | 0.00 |
| 212646_at   | RFTN1    | raftlin, lipid raft li | 4.25  | 2.09  | 0.00 | 0.00 |
| 218430_s_at | RFX7     | regulatory factor      | 0.30  | -1.74 | 0.00 | 0.00 |
| 209568_s_at | RGL1     | ral guanine nuck       | 3.00  | 1.59  | 0.00 | 0.00 |
| 204316_at   | RGS10    | regulator of G-pr      | 4.03  | 2.01  | 0.00 | 0.00 |
| 202388_at   | RGS2     | regulator of G-pr      | 0.21  | -2.26 | 0.00 | 0.00 |
| 203823_at   | RGS3     | regulator of G-pr      | 3.05  | 1.61  | 0.00 | 0.00 |
| 209071_s_at | RGS5     | regulator of G-pr      | 3.49  | 1.81  | 0.00 | 0.00 |
| 219554_at   | RHCG     | Rh family, C glyc      | 56.79 | 5.83  | 0.00 | 0.00 |
| 212651_at   | RHOBTB1  | Rho-related BTB        | 0.28  | -1.85 | 0.00 | 0.00 |
| 202975_s_at | RHOBTB3  | Rho-related BTB        | 0.15  | -2.73 | 0.00 | 0.00 |
| 202976_s_at | RHOBTB3  | Rho-related BTB        | 0.09  | -3.45 | 0.00 | 0.00 |
| 31846_at    | RHOD     | ras homolog gen        | 5.31  | 2.41  | 0.00 | 0.00 |
| 222148_s_at | RHOT1    | ras homolog gen        | 0.27  | -1.89 | 0.00 | 0.00 |
| 218323_at   | RHOT1    | ras homolog gen        | 0.24  | -2.09 | 0.00 | 0.00 |
| 205414_s_at | RICH2    | Rho-type GTPas         | 0.31  | -1.70 | 0.00 | 0.00 |
| 214700_x_at | RIF1     | RAP1 interactin        | 0.22  | -2.18 | 0.00 | 0.00 |
| 206137_at   | RIMS2    | regulating synap       | 4.48  | 2.16  | 0.00 | 0.00 |

|             |               |                     |        |       |      |      |
|-------------|---------------|---------------------|--------|-------|------|------|
| 218598_at   | RINT1         | RAD50 interacto     | 0.28   | -1.81 | 0.00 | 0.00 |
| 209545_s_at | RIPK2         | receptor-interact   | 3.30   | 1.72  | 0.00 | 0.00 |
| 220329_s_at | RMND1         | required for meic   | 0.28   | -1.84 | 0.00 | 0.00 |
| 218497_s_at | RNASEH1       | ribonuclease H1     | 3.10   | 1.63  | 0.00 | 0.00 |
| 203022_at   | RNASEH2A      | ribonuclease H2     | 5.67   | 2.50  | 0.00 | 0.00 |
| 210056_at   | RND1          | Rho family GTPe     | 4.67   | 2.22  | 0.00 | 0.00 |
| 221063_x_at | RNF123        | ring finger protei  | 3.96   | 1.99  | 0.00 | 0.00 |
| 207735_at   | RNF125        | ring finger protei  | 0.08   | -3.69 | 0.00 | 0.00 |
| 219263_at   | RNF128        | ring finger protei  | 0.20   | -2.32 | 0.00 | 0.01 |
| 204040_at   | RNF144A       | ring finger protei  | 3.84   | 1.94  | 0.00 | 0.00 |
| 211387_x_at | RNGTT         | RNA guanylyltra     | 0.22   | -2.17 | 0.00 | 0.00 |
| 219550_at   | ROBO3         | roundabout, axo     | 0.28   | -1.85 | 0.00 | 0.00 |
| 218394_at   | ROGDI         | rogdi homolog (L    | 7.10   | 2.83  | 0.00 | 0.00 |
| 210426_x_at | RORA          | RAR-related orp     | 0.19   | -2.38 | 0.00 | 0.00 |
| 210479_s_at | RORA          | RAR-related orp     | 0.19   | -2.42 | 0.00 | 0.00 |
| 220436_at   | RP11-138L21.1 | similar to cell rec | 0.21   | -2.24 | 0.00 | 0.00 |
| 205191_at   | RP2           | retinitis pigmentc  | 0.12   | -3.07 | 0.00 | 0.00 |
| 218499_at   | RP6-213H19.1  | serine/threonine    | 0.21   | -2.23 | 0.00 | 0.00 |
| 221943_x_at | RPL38         | ribosomal protei    | 0.33   | -1.60 | 0.00 | 0.00 |
| 219143_s_at | RPP25         | ribonuclease P/A    | 3.01   | 1.59  | 0.00 | 0.00 |
| 217723_x_at | RPS12         | ribosomal protei    | 3.70   | 1.89  | 0.00 | 0.00 |
| 221524_s_at | RRAGD         | Ras-related GTF     | 0.32   | -1.64 | 0.00 | 0.00 |
| 221523_s_at | RRAGD         | Ras-related GTF     | 0.21   | -2.28 | 0.00 | 0.00 |
| 212590_at   | RRAS2         | related RAS vira    | 6.80   | 2.77  | 0.00 | 0.00 |
| 212589_at   | RRAS2         | related RAS vira    | 3.48   | 1.80  | 0.00 | 0.00 |
| 201206_s_at | RRBP1         | ribosome binding    | 4.63   | 2.21  | 0.00 | 0.00 |
| 209773_s_at | RRM2          | ribonucleotide re   | 3.95   | 1.98  | 0.02 | 0.03 |
| 218758_s_at | RRP1          | ribosomal RNA r     | 3.22   | 1.69  | 0.00 | 0.00 |
| 214764_at   | RRP15         | ribosomal RNA r     | 0.19   | -2.43 | 0.00 | 0.00 |
| 33307_at    | RRP7A         | ribosomal RNA r     | 4.06   | 2.02  | 0.00 | 0.00 |
| 202937_x_at | RRP7A         | ribosomal RNA r     | 3.45   | 1.79  | 0.00 | 0.00 |
| 213797_at   | RSAD2         | radical S-adenos    | 3.12   | 1.64  | 0.00 | 0.00 |
| 213694_at   | RSBN1         | round spermatid     | 0.20   | -2.32 | 0.00 | 0.00 |
| 203485_at   | RTN1          | reticulon 1         | 0.19   | -2.40 | 0.00 | 0.00 |
| 210222_s_at | RTN1          | reticulon 1         | 0.17   | -2.56 | 0.00 | 0.00 |
| 219684_at   | RTP4          | receptor (chemo     | 9.42   | 3.24  | 0.00 | 0.00 |
| 210251_s_at | RUFY3         | RUN and FYVE        | 0.23   | -2.11 | 0.00 | 0.00 |
| 213939_s_at | RUFY3         | RUN and FYVE        | 0.22   | -2.21 | 0.00 | 0.00 |
| 213430_at   | RUFY3         | RUN and FYVE        | 0.18   | -2.44 | 0.00 | 0.00 |
| 203724_s_at | RUFY3         | RUN and FYVE        | 0.12   | -3.04 | 0.00 | 0.00 |
| 215321_at   | RUNDC3B       | RUN domain cor      | 0.13   | -2.97 | 0.00 | 0.00 |
| 209360_s_at | RUNX1         | runt-related trans  | 18.69  | 4.22  | 0.00 | 0.00 |
| 213066_at   | RUSC2         | RUN and SH3 do      | 3.32   | 1.73  | 0.00 | 0.00 |
| 205087_at   | RWDD3         | RWD domain co       | 0.30   | -1.76 | 0.00 | 0.00 |
| 205863_at   | S100A12       | S100 calcium bir    | 19.42  | 4.28  | 0.00 | 0.00 |
| 205916_at   | S100A7        | S100 calcium bir    | 78.27  | 6.29  | 0.00 | 0.00 |
| 202917_s_at | S100A8        | S100 calcium bir    | 141.07 | 7.14  | 0.00 | 0.00 |
| 214370_at   | S100A8        | S100 calcium bir    | 10.73  | 3.42  | 0.00 | 0.00 |

|             |           |                    |        |       |      |      |
|-------------|-----------|--------------------|--------|-------|------|------|
| 203535_at   | S100A9    | S100 calcium bir   | 540.01 | 9.08  | 0.00 | 0.00 |
| 204351_at   | S100P     | S100 calcium bir   | 8.23   | 3.04  | 0.00 | 0.00 |
| 204642_at   | S1PR1     | sphingosine-1-pl   | 0.32   | -1.67 | 0.00 | 0.00 |
| 213262_at   | SACS      | spastic ataxia of  | 0.29   | -1.79 | 0.00 | 0.00 |
| 213635_s_at | SAFB      | scaffold attachm   | 0.29   | -1.78 | 0.00 | 0.00 |
| 201543_s_at | SAR1A     | SAR1 homolog /     | 3.89   | 1.96  | 0.00 | 0.00 |
| 210790_s_at | SAR1A     | SAR1 homolog /     | 3.52   | 1.81  | 0.00 | 0.00 |
| 213257_at   | SARM1     | sterile alpha and  | 0.32   | -1.63 | 0.00 | 0.00 |
| 218702_at   | SARS2     | seryl-tRNA synt    | 3.10   | 1.63  | 0.00 | 0.00 |
| 215754_at   | SCARB2    | scavenger recep    | 0.30   | -1.73 | 0.00 | 0.00 |
| 201646_at   | SCARB2    | scavenger recep    | 0.29   | -1.78 | 0.00 | 0.00 |
| 206995_x_at | SCARF1    | scavenger recep    | 0.32   | -1.64 | 0.00 | 0.00 |
| 201826_s_at | SCCPDH    | saccharopine de    | 0.31   | -1.67 | 0.00 | 0.00 |
| 200831_s_at | SCD       | stearoyl-CoA de:   | 5.70   | 2.51  | 0.00 | 0.00 |
| 211708_s_at | SCD       | stearoyl-CoA de:   | 4.35   | 2.12  | 0.00 | 0.00 |
| 200832_s_at | SCD       | stearoyl-CoA de:   | 3.30   | 1.72  | 0.01 | 0.01 |
| 206884_s_at | SCEL      | sciellin           | 0.10   | -3.35 | 0.00 | 0.00 |
| 218793_s_at | SCML1     | sex comb on mic    | 0.31   | -1.68 | 0.00 | 0.00 |
| 206381_at   | SCN2A     | sodium channel,    | 4.15   | 2.05  | 0.00 | 0.00 |
| 215026_x_at | SCNN1A    | sodium channel,    | 3.85   | 1.95  | 0.00 | 0.00 |
| 205241_at   | SCO2      | SCO cytochrome     | 3.67   | 1.88  | 0.00 | 0.00 |
| 205695_at   | SDS       | serine dehydrata   | 4.10   | 2.03  | 0.00 | 0.00 |
| 212450_at   | SECISBP2L | SECIS binding p    | 0.25   | -2.02 | 0.00 | 0.00 |
| 213716_s_at | SECTM1    | secreted and tra   | 3.97   | 1.99  | 0.00 | 0.00 |
| 209880_s_at | SELPLG    | selectin P ligand  | 4.24   | 2.08  | 0.00 | 0.00 |
| 205405_at   | SEMA5A    | sema domain, se    | 3.89   | 1.96  | 0.00 | 0.00 |
| 208100_x_at | SEMA6C    | sema domain, tr    | 3.87   | 1.95  | 0.00 | 0.00 |
| 218122_s_at | SENP2     | SUMO1/sentrin/:    | 6.85   | 2.78  | 0.00 | 0.00 |
| 215114_at   | SENP3     | SUMO1/sentrin/:    | 0.28   | -1.82 | 0.00 | 0.00 |
| 202319_at   | SENP6     | SUMO1/sentrin :    | 0.32   | -1.66 | 0.00 | 0.00 |
| 214790_at   | SENP6     | SUMO1/sentrin :    | 0.09   | -3.45 | 0.00 | 0.00 |
| 210076_x_at | SERBP1    | SERPINE1 mRN       | 3.36   | 1.75  | 0.00 | 0.00 |
| 202376_at   | SERPINA3  | serpin peptidase   | 10.59  | 3.40  | 0.00 | 0.00 |
| 212268_at   | SERPINB1  | serpin peptidase   | 5.55   | 2.47  | 0.00 | 0.00 |
| 213572_s_at | SERPINB1  | serpin peptidase   | 4.87   | 2.28  | 0.00 | 0.00 |
| 209719_x_at | SERPINB3  | serpin peptidase   | 38.81  | 5.28  | 0.00 | 0.00 |
| 209720_s_at | SERPINB3  | serpin peptidase   | 21.55  | 4.43  | 0.00 | 0.00 |
| 211906_s_at | SERPINB4  | serpin peptidase   | 31.30  | 4.97  | 0.00 | 0.00 |
| 202628_s_at | SERPINE1  | serpin peptidase   | 3.85   | 1.95  | 0.00 | 0.00 |
| 202627_s_at | SERPINE1  | serpin peptidase   | 3.69   | 1.88  | 0.00 | 0.00 |
| 212190_at   | SERPINE2  | serpin peptidase   | 6.30   | 2.66  | 0.00 | 0.00 |
| 200986_at   | SERPING1  | serpin peptidase   | 5.60   | 2.48  | 0.00 | 0.00 |
| 207714_s_at | SERPINH1  | serpin peptidase   | 3.05   | 1.61  | 0.01 | 0.01 |
| 215038_s_at | SETD2     | SET domain con     | 0.28   | -1.86 | 0.00 | 0.00 |
| 216047_x_at | SEZ6L     | seizure related 6  | 3.17   | 1.66  | 0.00 | 0.00 |
| 210172_at   | SF1       | splicing factor 1  | 0.25   | -2.00 | 0.00 | 0.00 |
| 201585_s_at | SFPQ      | splicing factor pr | 0.31   | -1.67 | 0.00 | 0.00 |
| 214016_s_at | SFPQ      | splicing factor pr | 0.30   | -1.76 | 0.00 | 0.00 |

|             |           |                    |       |       |      |      |
|-------------|-----------|--------------------|-------|-------|------|------|
| 221768_at   | SFPQ      | splicing factor pr | 0.28  | -1.85 | 0.00 | 0.00 |
| 202037_s_at | SFRP1     | secreted frizzled  | 15.42 | 3.95  | 0.00 | 0.00 |
| 202036_s_at | SFRP1     | secreted frizzled  | 12.74 | 3.67  | 0.00 | 0.00 |
| 202035_s_at | SFRP1     | secreted frizzled  | 6.93  | 2.79  | 0.00 | 0.00 |
| 207468_s_at | SFRP5     | secreted frizzled  | 3.93  | 1.98  | 0.00 | 0.00 |
| 208863_s_at | SFRS1     | splicing factor, a | 0.25  | -2.01 | 0.00 | 0.00 |
| 200685_at   | SFRS11    | splicing factor, a | 0.32  | -1.64 | 0.00 | 0.00 |
| 213742_at   | SFRS11    | splicing factor, a | 0.17  | -2.55 | 0.00 | 0.00 |
| 217608_at   | SFRS12IP1 | SFRS12-interact    | 0.10  | -3.32 | 0.00 | 0.00 |
| 222310_at   | SFRS15    | splicing factor, a | 0.16  | -2.63 | 0.00 | 0.00 |
| 203624_at   | SFRS17A   | splicing factor, a | 0.33  | -1.61 | 0.00 | 0.00 |
| 212176_at   | SFRS18    | splicing factor, a | 0.33  | -1.62 | 0.00 | 0.00 |
| 213649_at   | SFRS7     | splicing factor, a | 0.29  | -1.78 | 0.00 | 0.00 |
| 202774_s_at | SFRS8     | splicing factor, a | 0.28  | -1.83 | 0.00 | 0.00 |
| 214838_at   | SFT2D2    | SFT2 domain co     | 4.29  | 2.10  | 0.00 | 0.00 |
| 207302_at   | SGCG      | sarcoglycan, gar   | 0.19  | -2.38 | 0.00 | 0.00 |
| 217538_at   | SGSM2     | small G protein ε  | 0.33  | -1.62 | 0.00 | 0.00 |
| 221269_s_at | SH3BGL3   | SH3 domain bin     | 3.39  | 1.76  | 0.00 | 0.00 |
| 217257_at   | SH3BP2    | SH3-domain bin     | 0.14  | -2.82 | 0.00 | 0.00 |
| 205637_s_at | SH3GL3    | SH3-domain GR      | 10.30 | 3.36  | 0.00 | 0.00 |
| 204019_s_at | SH3YL1    | SH3 domain con     | 0.29  | -1.78 | 0.00 | 0.00 |
| 204657_s_at | SHB       | Src homology 2     | 4.82  | 2.27  | 0.00 | 0.00 |
| 204967_at   | SHROOM2   | shroom family m    | 3.64  | 1.87  | 0.00 | 0.00 |
| 216537_s_at | SIGLEC7   | sialic acid bindin | 4.14  | 2.05  | 0.00 | 0.00 |
| 221705_s_at | SIKE1     | suppressor of IK   | 0.16  | -2.68 | 0.00 | 0.00 |
| 205063_at   | SIP1      | survival of motor  | 0.17  | -2.56 | 0.00 | 0.00 |
| 37831_at    | SIPA1L3   | signal-induced p   | 4.99  | 2.32  | 0.00 | 0.00 |
| 218878_s_at | SIRT1     | sirtuin (silent ma | 0.22  | -2.18 | 0.00 | 0.00 |
| 49327_at    | SIRT3     | sirtuin (silent ma | 6.63  | 2.73  | 0.00 | 0.00 |
| 219613_s_at | SIRT6     | sirtuin (silent ma | 3.49  | 1.80  | 0.00 | 0.00 |
| 204404_at   | SLC12A2   | solute carrier fan | 3.53  | 1.82  | 0.00 | 0.00 |
| 219874_at   | SLC12A8   | solute carrier fan | 3.61  | 1.85  | 0.00 | 0.00 |
| 205243_at   | SLC13A3   | solute carrier fan | 4.33  | 2.11  | 0.00 | 0.00 |
| 202235_at   | SLC16A1   | solute carrier fan | 3.33  | 1.74  | 0.00 | 0.00 |
| 219915_s_at | SLC16A10  | solute carrier fan | 0.24  | -2.09 | 0.00 | 0.00 |
| 210807_s_at | SLC16A7   | solute carrier fan | 0.26  | -1.96 | 0.00 | 0.00 |
| 207057_at   | SLC16A7   | solute carrier fan | 0.05  | -4.32 | 0.00 | 0.00 |
| 205857_at   | SLC18A2   | solute carrier fan | 0.32  | -1.63 | 0.01 | 0.01 |
| 211576_s_at | SLC19A1   | solute carrier fan | 3.04  | 1.60  | 0.00 | 0.00 |
| 209681_at   | SLC19A2   | solute carrier fan | 0.29  | -1.81 | 0.00 | 0.00 |
| 205421_at   | SLC22A3   | solute carrier fan | 0.24  | -2.06 | 0.00 | 0.00 |
| 209237_s_at | SLC23A2   | solute carrier fan | 3.87  | 1.95  | 0.00 | 0.00 |
| 201918_at   | SLC25A36  | solute carrier fan | 0.28  | -1.85 | 0.00 | 0.00 |
| 212683_at   | SLC25A44  | solute carrier fan | 0.30  | -1.72 | 0.00 | 0.00 |
| 219344_at   | SLC29A3   | solute carrier fan | 4.96  | 2.31  | 0.00 | 0.00 |
| 201249_at   | SLC2A1    | solute carrier fan | 4.25  | 2.09  | 0.00 | 0.00 |
| 202497_x_at | SLC2A3    | solute carrier fan | 0.32  | -1.65 | 0.00 | 0.00 |
| 218985_at   | SLC2A8    | solute carrier fan | 3.35  | 1.74  | 0.00 | 0.00 |

|             |         |                    |      |       |      |      |
|-------------|---------|--------------------|------|-------|------|------|
| 219991_at   | SLC2A9  | solute carrier fan | 9.27 | 3.21  | 0.00 | 0.00 |
| 207035_at   | SLC30A3 | solute carrier fan | 6.49 | 2.70  | 0.00 | 0.00 |
| 209865_at   | SLC35A3 | solute carrier fan | 0.23 | -2.13 | 0.00 | 0.00 |
| 218928_s_at | SLC37A1 | solute carrier fan | 0.21 | -2.26 | 0.00 | 0.00 |
| 219175_s_at | SLC41A3 | solute carrier fan | 5.22 | 2.38  | 0.00 | 0.00 |
| 222364_at   | SLC44A1 | solute carrier fan | 0.18 | -2.44 | 0.00 | 0.00 |
| 214719_at   | SLC46A3 | solute carrier fan | 0.27 | -1.91 | 0.00 | 0.00 |
| 219525_at   | SLC47A1 | solute carrier fan | 0.09 | -3.49 | 0.00 | 0.00 |
| 207771_at   | SLC5A2  | solute carrier fan | 3.45 | 1.79  | 0.00 | 0.00 |
| 213164_at   | SLC5A3  | solute carrier fan | 0.30 | -1.75 | 0.00 | 0.00 |
| 211123_at   | SLC5A5  | solute carrier fan | 4.39 | 2.13  | 0.00 | 0.00 |
| 204087_s_at | SLC5A6  | solute carrier fan | 3.17 | 1.66  | 0.00 | 0.00 |
| 208494_at   | SLC6A7  | solute carrier fan | 3.14 | 1.65  | 0.00 | 0.00 |
| 202752_x_at | SLC7A8  | solute carrier fan | 5.72 | 2.52  | 0.00 | 0.00 |
| 216604_s_at | SLC7A8  | solute carrier fan | 4.82 | 2.27  | 0.00 | 0.00 |
| 216092_s_at | SLC7A8  | solute carrier fan | 4.47 | 2.16  | 0.00 | 0.00 |
| 216603_at   | SLC7A8  | solute carrier fan | 3.00 | 1.59  | 0.00 | 0.00 |
| 208015_at   | SMAD1   | SMAD family me     | 0.18 | -2.51 | 0.00 | 0.00 |
| 205398_s_at | SMAD3   | SMAD family me     | 4.18 | 2.06  | 0.00 | 0.00 |
| 202527_s_at | SMAD4   | SMAD family me     | 0.29 | -1.77 | 0.00 | 0.00 |
| 205187_at   | SMAD5   | SMAD family me     | 0.05 | -4.32 | 0.00 | 0.00 |
| 206542_s_at | SMARCA2 | SWI/SNF relatec    | 0.14 | -2.82 | 0.00 | 0.00 |
| 208793_x_at | SMARCA4 | SWI/SNF relatec    | 4.19 | 2.07  | 0.00 | 0.00 |
| 209258_s_at | SMC3    | structural mainte  | 0.26 | -1.96 | 0.00 | 0.00 |
| 212926_at   | SMC5    | structural mainte  | 0.29 | -1.78 | 0.00 | 0.00 |
| 212579_at   | SMCHD1  | structural mainte  | 0.27 | -1.89 | 0.00 | 0.00 |
| 220368_s_at | SMEK1   | SMEK homolog       | 0.21 | -2.26 | 0.00 | 0.00 |
| 222270_at   | SMEK2   | SMEK homolog       | 0.15 | -2.74 | 0.00 | 0.00 |
| 210057_at   | SMG1    | SMG1 homolog,      | 0.08 | -3.70 | 0.00 | 0.00 |
| 219695_at   | SMPD3   | sphingomyelin p    | 5.02 | 2.33  | 0.00 | 0.00 |
| 213624_at   | SMPDL3A | sphingomyelin p    | 0.15 | -2.71 | 0.00 | 0.00 |
| 205596_s_at | SMURF2  | SMAD specific E    | 0.29 | -1.79 | 0.00 | 0.00 |
| 212921_at   | SMYD2   | SET and MYND       | 0.25 | -2.02 | 0.00 | 0.00 |
| 204104_at   | SNAPC2  | small nuclear RN   | 3.38 | 1.76  | 0.00 | 0.00 |
| 222286_at   | SNAPC3  | small nuclear RN   | 0.16 | -2.65 | 0.00 | 0.00 |
| 209481_at   | SNRK    | SNF related kina   | 0.27 | -1.90 | 0.00 | 0.00 |
| 207474_at   | SNRK    | SNF related kina   | 0.19 | -2.39 | 0.00 | 0.00 |
| 218493_at   | SNRNP25 | small nuclear rib  | 3.06 | 1.62  | 0.00 | 0.00 |
| 53912_at    | SNX11   | sorting nexin 11   | 4.03 | 2.01  | 0.00 | 0.00 |
| 220140_s_at | SNX11   | sorting nexin 11   | 3.51 | 1.81  | 0.00 | 0.00 |
| 219793_at   | SNX16   | sorting nexin 16   | 0.19 | -2.37 | 0.00 | 0.00 |
| 221498_at   | SNX27   | sorting nexin fan  | 0.23 | -2.12 | 0.00 | 0.00 |
| 203373_at   | SOCS2   | suppressor of cy   | 4.44 | 2.15  | 0.00 | 0.00 |
| 218087_s_at | SORBS1  | sorbin and SH3     | 0.08 | -3.61 | 0.00 | 0.00 |
| 212807_s_at | SORT1   | sortilin 1         | 4.00 | 2.00  | 0.00 | 0.00 |
| 209843_s_at | SOX10   | SRY (sex determ    | 3.10 | 1.63  | 0.00 | 0.00 |
| 202936_s_at | SOX9    | SRY (sex determ    | 5.89 | 2.56  | 0.00 | 0.00 |
| 202935_s_at | SOX9    | SRY (sex determ    | 4.06 | 2.02  | 0.00 | 0.00 |



|             |          |                    |       |       |      |      |
|-------------|----------|--------------------|-------|-------|------|------|
| 210985_s_at | SP100    | SP100 nuclear a    | 0.31  | -1.70 | 0.00 | 0.00 |
| 208012_x_at | SP110    | SP110 nuclear b    | 3.85  | 1.94  | 0.00 | 0.00 |
| 214791_at   | SP140L   | SP140 nuclear b    | 4.05  | 2.02  | 0.00 | 0.00 |
| 205406_s_at | SPA17    | sperm autoantigi   | 3.80  | 1.92  | 0.00 | 0.00 |
| 219109_at   | SPAG16   | sperm associate    | 0.31  | -1.67 | 0.00 | 0.00 |
| 200665_s_at | SPARC    | secreted protein,  | 3.92  | 1.97  | 0.00 | 0.00 |
| 200795_at   | SPARCL1  | SPARC-like 1 (h    | 7.49  | 2.91  | 0.00 | 0.00 |
| 204433_s_at | SPATA2   | spermatogenesis:   | 3.15  | 1.66  | 0.00 | 0.00 |
| 215694_at   | SPATA5L1 | spermatogenesis:   | 0.30  | -1.74 | 0.00 | 0.00 |
| 220298_s_at | SPATA6   | spermatogenesis:   | 0.20  | -2.33 | 0.00 | 0.00 |
| 219583_s_at | SPATA7   | spermatogenesis:   | 0.21  | -2.24 | 0.00 | 0.00 |
| 213442_x_at | SPDEF    | SAM pointed dor    | 7.69  | 2.94  | 0.00 | 0.00 |
| 213441_x_at | SPDEF    | SAM pointed dor    | 6.70  | 2.75  | 0.00 | 0.00 |
| 220192_x_at | SPDEF    | SAM pointed dor    | 5.85  | 2.55  | 0.00 | 0.00 |
| 214404_x_at | SPDEF    | SAM pointed dor    | 3.71  | 1.89  | 0.00 | 0.00 |
| 212526_at   | SPG20    | spastic parapleg   | 0.21  | -2.29 | 0.00 | 0.00 |
| 217813_s_at | SPIN1    | spindlin 1         | 0.19  | -2.42 | 0.00 | 0.00 |
| 206239_s_at | SPINK1   | serine peptidase   | 0.17  | -2.56 | 0.00 | 0.00 |
| 206057_x_at | SPN      | sialophorin        | 3.39  | 1.76  | 0.00 | 0.00 |
| 202523_s_at | SPOCK2   | sparc/osteonecti   | 4.67  | 2.22  | 0.00 | 0.00 |
| 208927_at   | SPOP     | speckle-type PO    | 0.33  | -1.60 | 0.00 | 0.00 |
| 203458_at   | SPR      | sepiapterin redu   | 4.90  | 2.29  | 0.00 | 0.00 |
| 214549_x_at | SPRR1A   | small proline-ric  | 21.89 | 4.45  | 0.00 | 0.00 |
| 213796_at   | SPRR1A   | small proline-ric  | 12.48 | 3.64  | 0.00 | 0.00 |
| 220664_at   | SPRR2C   | small proline-ric  | 5.37  | 2.42  | 0.00 | 0.00 |
| 218990_s_at | SPRR3    | small proline-ric  | 15.33 | 3.94  | 0.00 | 0.00 |
| 204011_at   | SPRY2    | sprouty homolog    | 0.20  | -2.32 | 0.00 | 0.00 |
| 221489_s_at | SPRY4    | sprouty homolog    | 7.49  | 2.91  | 0.00 | 0.00 |
| 214925_s_at | SPTAN1   | spectrin, alpha, r | 0.17  | -2.59 | 0.00 | 0.00 |
| 214145_s_at | SPTB     | spectrin, beta, er | 3.19  | 1.67  | 0.00 | 0.00 |
| 220185_at   | SPTBN4   | spectrin, beta, nr | 3.88  | 1.96  | 0.00 | 0.00 |
| 220456_at   | SPTLC3   | serine palmitoylt  | 0.22  | -2.17 | 0.00 | 0.00 |
| 212061_at   | SR140    | U2-associated S    | 0.24  | -2.05 | 0.00 | 0.00 |
| 38766_at    | SRCAP    | Snf2-related CRI   | 3.73  | 1.90  | 0.00 | 0.00 |
| 201248_s_at | SREBF2   | sterol regulatory  | 3.45  | 1.79  | 0.00 | 0.00 |
| 213329_at   | SRGAP2   | SLIT-ROBO Rhc      | 0.20  | -2.32 | 0.00 | 0.00 |
| 201859_at   | SRGN     | serglycin          | 6.39  | 2.68  | 0.00 | 0.00 |
| 202199_s_at | SRPK1    | SFRS protein kir   | 3.24  | 1.70  | 0.00 | 0.00 |
| 222046_at   | SRRT     | serrate RNA effe   | 0.30  | -1.73 | 0.00 | 0.00 |
| 202817_s_at | SS18     | synovial sarcom:   | 0.22  | -2.19 | 0.00 | 0.00 |
| 219241_x_at | SSH3     | slingshot homolc   | 3.79  | 1.92  | 0.00 | 0.00 |
| 203114_at   | SSSCA1   | Sjogren syndrom    | 4.57  | 2.19  | 0.00 | 0.00 |
| 217650_x_at | ST3GAL2  | ST3 beta-galact    | 0.22  | -2.18 | 0.00 | 0.00 |
| 38487_at    | STAB1    | stabilin 1         | 3.35  | 1.74  | 0.00 | 0.00 |
| 205743_at   | STAC     | SH3 and cystein    | 3.16  | 1.66  | 0.00 | 0.00 |
| 209023_s_at | STAG2    | stromal antigen ;  | 0.19  | -2.37 | 0.00 | 0.00 |
| 204548_at   | STAR     | steroidogenic ac   | 0.29  | -1.81 | 0.00 | 0.00 |
| 200887_s_at | STAT1    | signal transduce   | 3.55  | 1.83  | 0.00 | 0.00 |

|             |         |                    |       |       |      |      |
|-------------|---------|--------------------|-------|-------|------|------|
| 208992_s_at | STAT3   | signal transduce   | 4.73  | 2.24  | 0.00 | 0.00 |
| 208991_at   | STAT3   | signal transduce   | 3.19  | 1.67  | 0.00 | 0.00 |
| 204595_s_at | STC1    | stanniocalcin 1    | 3.74  | 1.90  | 0.01 | 0.01 |
| 41657_at    | STK11   | serine/threonine   | 5.61  | 2.49  | 0.00 | 0.00 |
| 211085_s_at | STK4    | serine/threonine   | 0.28  | -1.85 | 0.00 | 0.00 |
| 203457_at   | STX7    | syntaxin 7         | 0.29  | -1.77 | 0.00 | 0.00 |
| 203310_at   | STXBP3  | syntaxin binding   | 0.32  | -1.64 | 0.00 | 0.00 |
| 220994_s_at | STXBP6  | syntaxin binding   | 0.20  | -2.34 | 0.00 | 0.00 |
| 214835_s_at | SUCLG2  | succinate-CoA li   | 0.33  | -1.62 | 0.00 | 0.00 |
| 219425_at   | SULT4A1 | sulfotransferase   | 3.25  | 1.70  | 0.00 | 0.00 |
| 206506_s_at | SUPT3H  | suppressor of Ty   | 3.11  | 1.64  | 0.00 | 0.00 |
| 219389_at   | SUSD4   | sushi domain co    | 14.01 | 3.81  | 0.00 | 0.00 |
| 216272_x_at | SYDE1   | synapse defectiv   | 4.23  | 2.08  | 0.00 | 0.00 |
| 44702_at    | SYDE1   | synapse defectiv   | 3.54  | 1.82  | 0.00 | 0.00 |
| 209025_s_at | SYNCRIP | synaptotagmin b    | 3.53  | 1.82  | 0.00 | 0.00 |
| 209447_at   | SYNE1   | spectrin repeat c  | 0.10  | -3.34 | 0.00 | 0.00 |
| 202761_s_at | SYNE2   | spectrin repeat c  | 0.24  | -2.05 | 0.00 | 0.00 |
| 210612_s_at | SYNJ2   | synaptojanin 2     | 0.29  | -1.81 | 0.00 | 0.00 |
| 215865_at   | SYT12   | synaptotagmin X    | 7.01  | 2.81  | 0.00 | 0.00 |
| 205613_at   | SYT17   | synaptotagmin X    | 0.16  | -2.62 | 0.00 | 0.00 |
| 214903_at   | SYT2    | synaptotagmin II   | 3.19  | 1.67  | 0.00 | 0.00 |
| 206552_s_at | TAC1    | tachykinin, precu  | 0.17  | -2.60 | 0.00 | 0.00 |
| 202289_s_at | TACC2   | transforming, aci  | 0.30  | -1.72 | 0.00 | 0.00 |
| 214690_at   | TAF1B   | TATA box bindin    | 0.26  | -1.94 | 0.00 | 0.00 |
| 221617_at   | TAF9B   | TAF9B RNA poly     | 0.33  | -1.60 | 0.00 | 0.00 |
| 204769_s_at | TAP2    | transporter 2, AT  | 5.04  | 2.33  | 0.00 | 0.00 |
| 221264_s_at | TARDBP  | TAR DNA bindin     | 0.23  | -2.11 | 0.00 | 0.00 |
| 212350_at   | TBC1D1  | TBC1 (tre-2/USF    | 3.13  | 1.65  | 0.00 | 0.00 |
| 203387_s_at | TBC1D4  | TBC1 domain fa     | 0.30  | -1.72 | 0.00 | 0.00 |
| 203386_at   | TBC1D4  | TBC1 domain fa     | 0.23  | -2.13 | 0.00 | 0.00 |
| 204526_s_at | TBC1D8  | TBC1 domain fa     | 0.26  | -1.95 | 0.00 | 0.00 |
| 219771_at   | TBC1D8B | TBC1 domain fa     | 0.33  | -1.61 | 0.00 | 0.00 |
| 212956_at   | TBC1D9  | TBC1 domain fa     | 3.09  | 1.63  | 0.01 | 0.02 |
| 219682_s_at | TBX3    | T-box 3            | 0.28  | -1.82 | 0.00 | 0.00 |
| 212762_s_at | TCF7L2  | transcription fact | 0.19  | -2.36 | 0.00 | 0.00 |
| 213780_at   | TCHH    | trichohyalin       | 23.96 | 4.58  | 0.00 | 0.00 |
| 205513_at   | TCN1    | transcobalamin I   | 26.45 | 4.73  | 0.00 | 0.00 |
| 204043_at   | TCN2    | transcobalamin I   | 3.12  | 1.64  | 0.00 | 0.00 |
| 202384_s_at | TCOF1   | Treacher Collins   | 0.28  | -1.85 | 0.00 | 0.00 |
| 205797_s_at | TCP11L1 | t-complex 11 (m    | 3.14  | 1.65  | 0.00 | 0.00 |
| 218584_at   | TCTN1   | tectonic family m  | 4.04  | 2.01  | 0.00 | 0.00 |
| 208089_s_at | TDRD3   | tudor domain coi   | 0.25  | -2.00 | 0.00 | 0.00 |
| 212084_at   | TEX261  | testis expressed   | 3.71  | 1.89  | 0.00 | 0.00 |
| 212083_at   | TEX261  | testis expressed   | 3.04  | 1.60  | 0.00 | 0.00 |
| 203176_s_at | TFAM    | transcription fact | 0.33  | -1.62 | 0.00 | 0.00 |
| 204654_s_at | TFAP2A  | transcription fact | 0.13  | -2.93 | 0.00 | 0.00 |
| 205688_at   | TFAP4   | transcription fact | 3.28  | 1.71  | 0.00 | 0.00 |
| 203588_s_at | TFDP2   | transcription fact | 3.62  | 1.86  | 0.00 | 0.00 |

|             |           |                    |       |       |      |      |
|-------------|-----------|--------------------|-------|-------|------|------|
| 204731_at   | TGFBR3    | transforming gro   | 0.27  | -1.91 | 0.00 | 0.01 |
| 206008_at   | TGM1      | transglutaminase   | 4.34  | 2.12  | 0.01 | 0.01 |
| 1316_at     | THRA      | thyroid hormone    | 0.24  | -2.05 | 0.00 | 0.00 |
| 201148_s_at | TIMP3     | TIMP metallopro    | 13.03 | 3.70  | 0.00 | 0.00 |
| 203222_s_at | TLE1      | transducin-like e  | 0.29  | -1.78 | 0.00 | 0.00 |
| 216997_x_at | TLE4      | transducin-like e  | 0.28  | -1.83 | 0.00 | 0.00 |
| 204924_at   | TLR2      | toll-like receptor | 3.64  | 1.86  | 0.00 | 0.00 |
| 213882_at   | TM2D1     | TM2 domain con     | 0.24  | -2.09 | 0.00 | 0.00 |
| 209387_s_at | TM4SF1    | transmembrane      | 12.06 | 3.59  | 0.00 | 0.00 |
| 215034_s_at | TM4SF1    | transmembrane      | 11.73 | 3.55  | 0.00 | 0.00 |
| 209386_at   | TM4SF1    | transmembrane      | 7.57  | 2.92  | 0.00 | 0.00 |
| 219892_at   | TM6SF1    | transmembrane      | 0.33  | -1.61 | 0.00 | 0.00 |
| 200803_s_at | TMBIM6    | transmembrane      | 3.87  | 1.95  | 0.00 | 0.00 |
| 219580_s_at | TMC5      | transmembrane      | 0.24  | -2.06 | 0.00 | 0.00 |
| 220240_s_at | TMCO3     | transmembrane      | 3.12  | 1.64  | 0.00 | 0.00 |
| 200929_at   | TMED10    | transmembrane      | 5.18  | 2.37  | 0.00 | 0.00 |
| 218834_s_at | TMEM132A  | transmembrane      | 8.04  | 3.01  | 0.00 | 0.00 |
| 218477_at   | TMEM14A   | transmembrane      | 3.73  | 1.90  | 0.00 | 0.00 |
| 213272_s_at | TMEM159   | transmembrane      | 0.22  | -2.16 | 0.00 | 0.00 |
| 218745_x_at | TMEM161A  | transmembrane      | 10.25 | 3.36  | 0.00 | 0.00 |
| 221512_at   | TMEM222   | transmembrane      | 3.22  | 1.69  | 0.00 | 0.00 |
| 219462_at   | TMEM53    | transmembrane      | 3.34  | 1.74  | 0.00 | 0.00 |
| 213024_at   | TMF1      | TATA element r     | 0.27  | -1.88 | 0.00 | 0.00 |
| 207602_at   | TMPRSS11D | transmembrane      | 15.23 | 3.93  | 0.00 | 0.00 |
| 218960_at   | TMPRSS4   | transmembrane      | 5.55  | 2.47  | 0.00 | 0.00 |
| 221032_s_at | TMPRSS5   | transmembrane      | 4.70  | 2.23  | 0.00 | 0.00 |
| 217733_s_at | TMSB10    | thymosin beta 1(   | 3.46  | 1.79  | 0.00 | 0.00 |
| 201645_at   | TNC       | tenascin C         | 4.51  | 2.17  | 0.01 | 0.01 |
| 218368_s_at | TNFRSF12A | tumor necrosis fr  | 5.04  | 2.33  | 0.00 | 0.00 |
| 218856_at   | TNFRSF21  | tumor necrosis fr  | 22.84 | 4.51  | 0.00 | 0.00 |
| 219423_x_at | TNFRSF25  | tumor necrosis fr  | 0.27  | -1.88 | 0.00 | 0.00 |
| 211841_s_at | TNFRSF25  | tumor necrosis fr  | 0.24  | -2.06 | 0.00 | 0.00 |
| 202688_at   | TNFSF10   | tumor necrosis fr  | 3.60  | 1.85  | 0.00 | 0.00 |
| 218228_s_at | TNKS2     | tankyrase, TRF1    | 0.30  | -1.75 | 0.00 | 0.00 |
| 206393_at   | TNNI2     | troponin I type 2  | 0.11  | -3.19 | 0.00 | 0.00 |
| 215389_s_at | TNNT2     | troponin T type 2  | 0.18  | -2.51 | 0.00 | 0.00 |
| 221507_at   | TNPO2     | transportin 2      | 0.27  | -1.88 | 0.00 | 0.00 |
| 206817_x_at | TNRC4     | trinucleotide repr | 5.49  | 2.46  | 0.00 | 0.00 |
| 213254_at   | TNRC6B    | trinucleotide repr | 0.32  | -1.63 | 0.00 | 0.00 |
| 217853_at   | TNS3      | tensin 3           | 4.14  | 2.05  | 0.00 | 0.00 |
| 217413_s_at | TNXB      | tenascin XB        | 3.24  | 1.70  | 0.00 | 0.00 |
| 208609_s_at | TNXB      | tenascin XB        | 0.28  | -1.82 | 0.00 | 0.00 |
| 202807_s_at | TOM1      | target of myb1 (c  | 3.03  | 1.60  | 0.00 | 0.00 |
| 214840_at   | TOM1L2    | target of myb1-lil | 4.23  | 2.08  | 0.00 | 0.00 |
| 217960_s_at | TOMM22    | translocase of oi  | 3.39  | 1.76  | 0.00 | 0.00 |
| 204071_s_at | TOPORS    | topoisomerase I    | 0.29  | -1.79 | 0.00 | 0.00 |
| 210609_s_at | TP53I3    | tumor protein p5   | 3.38  | 1.76  | 0.00 | 0.00 |
| 201691_s_at | TPD52     | tumor protein D5   | 0.18  | -2.47 | 0.00 | 0.00 |

|             |          |                     |       |       |      |      |
|-------------|----------|---------------------|-------|-------|------|------|
| 210987_x_at | TPM1     | tropomyosin 1 (a    | 3.12  | 1.64  | 0.01 | 0.01 |
| 209344_at   | TPM4     | tropomyosin 4       | 4.82  | 2.27  | 0.00 | 0.00 |
| 203375_s_at | TPP2     | tripeptidyl peptid  | 0.23  | -2.10 | 0.00 | 0.00 |
| 218876_at   | TPPP3    | tubulin polymeriz   | 0.08  | -3.73 | 0.00 | 0.00 |
| 215220_s_at | TPR      | translocated proi   | 0.07  | -3.81 | 0.00 | 0.00 |
| 215382_x_at | TPSAB1   | tryptase alpha/b    | 3.19  | 1.67  | 0.01 | 0.02 |
| 210052_s_at | TPX2     | TPX2, microtubu     | 4.92  | 2.30  | 0.00 | 0.00 |
| 213593_s_at | TRA2A    | transformer 2 alç   | 0.20  | -2.30 | 0.00 | 0.00 |
| 221807_s_at | TRABD    | TraB domain cor     | 3.79  | 1.92  | 0.00 | 0.00 |
| 204352_at   | TRAF5    | TNF receptor-as     | 0.33  | -1.59 | 0.00 | 0.00 |
| 209412_at   | TRAPPC10 | trafficking proteir | 0.30  | -1.76 | 0.00 | 0.00 |
| 215269_at   | TRAPPC10 | trafficking proteir | 0.15  | -2.76 | 0.00 | 0.00 |
| 203511_s_at | TRAPPC3  | trafficking proteir | 3.91  | 1.97  | 0.00 | 0.00 |
| 56829_at    | TRAPPC9  | trafficking proteir | 6.69  | 2.74  | 0.00 | 0.00 |
| 221672_s_at | TRAPPC9  | trafficking proteir | 3.44  | 1.78  | 0.00 | 0.00 |
| 219725_at   | TREM2    | triggering recept   | 3.58  | 1.84  | 0.00 | 0.00 |
| 213293_s_at | TRIM22   | tripartite motif-cc | 4.11  | 2.04  | 0.00 | 0.00 |
| 204732_s_at | TRIM23   | tripartite motif-cc | 0.25  | -2.00 | 0.00 | 0.00 |
| 206911_at   | TRIM25   | tripartite motif-cc | 4.21  | 2.07  | 0.00 | 0.00 |
| 212116_at   | TRIM27   | tripartite motif-cc | 4.44  | 2.15  | 0.00 | 0.00 |
| 213885_at   | TRIM3    | tripartite motif-cc | 0.30  | -1.76 | 0.00 | 0.00 |
| 214815_at   | TRIM33   | tripartite motif-cc | 0.26  | -1.93 | 0.00 | 0.00 |
| 212435_at   | TRIM33   | tripartite motif-cc | 0.21  | -2.25 | 0.00 | 0.00 |
| 203610_s_at | TRIM38   | tripartite motif-cc | 7.54  | 2.92  | 0.00 | 0.00 |
| 221897_at   | TRIM52   | tripartite motif-cc | 0.26  | -1.97 | 0.00 | 0.00 |
| 210760_x_at | TRIP11   | thyroid hormone     | 6.28  | 2.65  | 0.00 | 0.00 |
| 218877_s_at | TRMT11   | tRNA methyltran     | 0.17  | -2.60 | 0.00 | 0.00 |
| 205802_at   | TRPC1    | transient receptc   | 0.15  | -2.72 | 0.00 | 0.00 |
| 205803_s_at | TRPC1    | transient receptc   | 0.15  | -2.78 | 0.00 | 0.00 |
| 206528_at   | TRPC6    | transient receptc   | 0.27  | -1.91 | 0.00 | 0.00 |
| 209108_at   | TSPAN6   | tetraspanin 6       | 3.06  | 1.61  | 0.00 | 0.00 |
| 217162_at   | TSPY1    | testis specific pr  | 3.77  | 1.91  | 0.00 | 0.00 |
| 213922_at   | TTBK2    | tau tubulin kinas   | 0.11  | -3.25 | 0.00 | 0.00 |
| 219421_at   | TTC33    | tetratricopeptide   | 0.27  | -1.92 | 0.00 | 0.00 |
| 213172_at   | TTC9     | tetratricopeptide   | 0.29  | -1.80 | 0.00 | 0.00 |
| 213646_x_at | TUBA1B   | tubulin, alpha 1b   | 3.04  | 1.61  | 0.00 | 0.00 |
| 216323_x_at | TUBA3D   | tubulin, alpha 3d   | 3.02  | 1.59  | 0.00 | 0.00 |
| 211714_x_at | TUBB     | tubulin, beta       | 3.54  | 1.82  | 0.00 | 0.00 |
| 214876_s_at | TUBGCP5  | tubulin, gamma c    | 0.17  | -2.53 | 0.00 | 0.00 |
| 203272_s_at | TUSC2    | tumor suppressc     | 3.77  | 1.91  | 0.00 | 0.00 |
| 216609_at   | TXN      | thioredoxin         | 0.18  | -2.48 | 0.00 | 0.00 |
| 209078_s_at | TXN2     | thioredoxin 2       | 4.70  | 2.23  | 0.00 | 0.00 |
| 221253_s_at | TXNDC5   | thioredoxin dom     | 3.35  | 1.75  | 0.00 | 0.00 |
| 201266_at   | TXNRD1   | thioredoxin redu    | 3.21  | 1.68  | 0.00 | 0.00 |
| 211177_s_at | TXNRD2   | thioredoxin redu    | 3.04  | 1.61  | 0.00 | 0.00 |
| 59631_at    | TXNRD3   | thioredoxin redu    | 6.37  | 2.67  | 0.00 | 0.00 |
| 221906_at   | TXNRD3   | thioredoxin redu    | 3.01  | 1.59  | 0.00 | 0.00 |
| 204858_s_at | TYMP     | thymidine phosp     | 14.22 | 3.83  | 0.00 | 0.00 |

|             |        |                    |      |       |      |      |
|-------------|--------|--------------------|------|-------|------|------|
| 218382_s_at | U2AF2  | U2 small nuclea    | 6.07 | 2.60  | 0.00 | 0.00 |
| 209947_at   | UBAP2L | ubiquitin associa  | 0.32 | -1.63 | 0.00 | 0.00 |
| 218837_s_at | UBE2D4 | ubiquitin-conjug   | 7.29 | 2.87  | 0.00 | 0.00 |
| 217799_x_at | UBE2H  | ubiquitin-conjug   | 3.43 | 1.78  | 0.00 | 0.00 |
| 211008_s_at | UBE2I  | ubiquitin-conjug   | 3.36 | 1.75  | 0.00 | 0.00 |
| 203109_at   | UBE2M  | ubiquitin-conjug   | 3.86 | 1.95  | 0.00 | 0.00 |
| 221746_at   | UBL4A  | ubiquitin-like 4A  | 3.57 | 1.83  | 0.00 | 0.00 |
| 207253_s_at | UBN1   | ubinnuclein 1      | 5.12 | 2.36  | 0.00 | 0.00 |
| 215544_s_at | UBOX5  | U-box domain cc    | 3.41 | 1.77  | 0.00 | 0.00 |
| 212074_at   | UNC84A | unc-84 homolog     | 0.31 | -1.68 | 0.00 | 0.00 |
| 206487_at   | UNC84A | unc-84 homolog     | 0.26 | -1.95 | 0.00 | 0.00 |
| 214382_at   | UNC93A | unc-93 homolog     | 0.30 | -1.75 | 0.01 | 0.01 |
| 202330_s_at | UNG    | uracil-DNA glycc   | 0.21 | -2.27 | 0.00 | 0.00 |
| 203234_at   | UPP1   | uridine phospho    | 9.76 | 3.29  | 0.00 | 0.00 |
| 202412_s_at | USP1   | ubiquitin specific | 0.23 | -2.14 | 0.00 | 0.00 |
| 215886_x_at | USP12  | ubiquitin specific | 0.21 | -2.23 | 0.00 | 0.00 |
| 212980_at   | USP34  | ubiquitin specific | 0.28 | -1.82 | 0.00 | 0.00 |
| 215013_s_at | USP34  | ubiquitin specific | 0.26 | -1.95 | 0.00 | 0.00 |
| 212065_s_at | USP34  | ubiquitin specific | 0.17 | -2.56 | 0.00 | 0.00 |
| 205139_s_at | UST    | uronyl-2-sulfotra  | 0.31 | -1.68 | 0.00 | 0.00 |
| 213326_at   | VAMP1  | vesicle-associat   | 0.25 | -2.00 | 0.00 | 0.00 |
| 205586_x_at | VGf    | VGf nerve grow     | 3.01 | 1.59  | 0.00 | 0.00 |
| 205946_at   | VIPR2  | vasoactive intest  | 7.70 | 2.94  | 0.00 | 0.00 |
| 220528_at   | VNN3   | vanin 3            | 5.25 | 2.39  | 0.00 | 0.00 |
| 204376_at   | VPRBP  | Vpr (HIV-1) bind   | 0.30 | -1.74 | 0.00 | 0.00 |
| 204377_s_at | VPRBP  | Vpr (HIV-1) bind   | 0.13 | -2.90 | 0.00 | 0.00 |
| 214785_at   | VPS13A | vacuolar protein   | 0.21 | -2.26 | 0.00 | 0.00 |
| 218396_at   | VPS13C | vacuolar protein   | 0.23 | -2.14 | 0.00 | 0.00 |
| 220221_at   | VPS13D | vacuolar protein   | 0.28 | -1.84 | 0.00 | 0.00 |
| 203797_at   | VSNL1  | visinin-like 1     | 3.85 | 1.95  | 0.01 | 0.01 |
| 202112_at   | VWF    | von Willebrand fi  | 9.73 | 3.28  | 0.00 | 0.00 |
| 200628_s_at | WARS   | tryptophanyl-tRN   | 5.53 | 2.47  | 0.00 | 0.00 |
| 200629_at   | WARS   | tryptophanyl-tRN   | 3.66 | 1.87  | 0.00 | 0.00 |
| 205809_s_at | WASL   | Wiskott-Aldrich s  | 0.32 | -1.64 | 0.00 | 0.00 |
| 201420_s_at | WDR77  | WD repeat dom      | 3.22 | 1.69  | 0.00 | 0.00 |
| 212533_at   | WEE1   | WEE1 homolog       | 0.27 | -1.88 | 0.00 | 0.00 |
| 203892_at   | WFDC2  | WAP four-disulfu   | 3.13 | 1.65  | 0.00 | 0.00 |
| 39313_at    | WNK1   | WNK lysine defic   | 0.12 | -3.10 | 0.00 | 0.00 |
| 205648_at   | WNT2   | wingless-type MI   | 0.25 | -2.01 | 0.00 | 0.00 |
| 208606_s_at | WNT4   | wingless-type MI   | 0.29 | -1.80 | 0.00 | 0.00 |
| 205990_s_at | WNT5A  | wingless-type MI   | 4.47 | 2.16  | 0.00 | 0.00 |
| 212637_s_at | WWP1   | WW domain con      | 0.20 | -2.35 | 0.00 | 0.00 |
| 206133_at   | XAF1   | XIAP associated    | 3.67 | 1.88  | 0.00 | 0.00 |
| 207598_x_at | XRCC2  | X-ray repair com   | 0.26 | -1.93 | 0.00 | 0.00 |
| 213725_x_at | XYLT1  | xylosyltransferas  | 0.28 | -1.83 | 0.00 | 0.00 |
| 218911_at   | YEATS4 | YEATS domain c     | 0.17 | -2.60 | 0.00 | 0.00 |
| 202418_at   | YIF1A  | Yip1 interacting i | 3.20 | 1.68  | 0.00 | 0.00 |
| 65086_at    | YIPF2  | Yip1 domain farr   | 3.28 | 1.71  | 0.00 | 0.00 |

|             |         |                    |      |       |      |      |
|-------------|---------|--------------------|------|-------|------|------|
| 212343_at   | YIPF6   | Yip1 domain farr   | 0.31 | -1.68 | 0.00 | 0.00 |
| 214814_at   | YTHDC1  | YTH domain cor     | 0.12 | -3.12 | 0.00 | 0.00 |
| 219836_at   | ZBED2   | zinc finger, BED-  | 8.21 | 3.04  | 0.00 | 0.00 |
| 205092_x_at | ZBTB1   | zinc finger and B  | 0.21 | -2.28 | 0.00 | 0.00 |
| 205883_at   | ZBTB16  | zinc finger and B  | 0.08 | -3.67 | 0.00 | 0.00 |
| 220391_at   | ZBTB3   | zinc finger and B  | 0.25 | -2.03 | 0.00 | 0.00 |
| 218810_at   | ZC3H12A | zinc finger CCCC   | 6.03 | 2.59  | 0.00 | 0.00 |
| 213064_at   | ZC3H14  | zinc finger CCCC   | 0.33 | -1.60 | 0.00 | 0.00 |
| 219062_s_at | ZCCHC2  | zinc finger, CCH   | 0.32 | -1.63 | 0.00 | 0.00 |
| 212419_at   | ZCCHC24 | zinc finger, CCH   | 6.02 | 2.59  | 0.00 | 0.00 |
| 221646_s_at | ZDHHC11 | zinc finger, DHH   | 0.02 | -5.60 | 0.00 | 0.00 |
| 219296_at   | ZDHHC13 | zinc finger, DHH   | 0.25 | -2.00 | 0.00 | 0.00 |
| 220261_s_at | ZDHHC4  | zinc finger, DHH   | 4.17 | 2.06  | 0.00 | 0.00 |
| 218020_s_at | ZFAND3  | zinc finger, AN1-  | 3.10 | 1.63  | 0.00 | 0.00 |
| 222186_at   | ZFAND6  | zinc finger, AN1-  | 0.27 | -1.90 | 0.00 | 0.00 |
| 211965_at   | ZFP36L1 | zinc finger protei | 0.33 | -1.61 | 0.00 | 0.00 |
| 201369_s_at | ZFP36L2 | zinc finger protei | 0.32 | -1.64 | 0.01 | 0.01 |
| 33148_at    | ZFR     | zinc finger RNA    | 0.30 | -1.72 | 0.00 | 0.00 |
| 214678_x_at | ZFX     | zinc finger protei | 0.21 | -2.23 | 0.00 | 0.00 |
| 219929_s_at | ZFYVE21 | zinc finger, FYVF  | 0.24 | -2.08 | 0.00 | 0.00 |
| 214900_at   | ZKSCAN1 | zinc finger with k | 0.27 | -1.88 | 0.00 | 0.00 |
| 218752_at   | ZMAT5   | zinc finger, matri | 4.27 | 2.10  | 0.00 | 0.00 |
| 221924_at   | ZMIZ2   | zinc finger, MIZ-1 | 0.30 | -1.72 | 0.00 | 0.00 |
| 206652_at   | ZMYM5   | zinc finger, MYM   | 0.13 | -2.96 | 0.00 | 0.00 |
| 219925_at   | ZMYM6   | zinc finger, MYM   | 0.19 | -2.39 | 0.00 | 0.00 |
| 202137_s_at | ZMYND11 | zinc finger, MYN   | 0.21 | -2.23 | 0.00 | 0.00 |
| 209049_s_at | ZMYND8  | zinc finger, MYN   | 0.24 | -2.06 | 0.00 | 0.00 |
| 205739_x_at | ZNF107  | zinc finger protei | 0.29 | -1.78 | 0.00 | 0.00 |
| 219571_s_at | ZNF12   | zinc finger protei | 0.21 | -2.28 | 0.00 | 0.00 |
| 219495_s_at | ZNF180  | zinc finger protei | 0.32 | -1.65 | 0.00 | 0.00 |
| 214823_at   | ZNF204  | zinc finger protei | 0.08 | -3.69 | 0.00 | 0.00 |
| 207128_s_at | ZNF223  | zinc finger protei | 0.25 | -2.01 | 0.00 | 0.00 |
| 220019_s_at | ZNF224  | zinc finger protei | 0.31 | -1.70 | 0.00 | 0.00 |
| 216983_s_at | ZNF224  | zinc finger protei | 0.13 | -2.97 | 0.00 | 0.00 |
| 205791_x_at | ZNF230  | zinc finger protei | 0.17 | -2.54 | 0.00 | 0.00 |
| 219171_s_at | ZNF236  | zinc finger protei | 0.22 | -2.18 | 0.00 | 0.00 |
| 212774_at   | ZNF238  | zinc finger protei | 0.24 | -2.04 | 0.00 | 0.00 |
| 203247_s_at | ZNF24   | zinc finger protei | 0.28 | -1.84 | 0.00 | 0.00 |
| 215239_x_at | ZNF273  | zinc finger protei | 0.15 | -2.70 | 0.00 | 0.00 |
| 221213_s_at | ZNF280D | zinc finger protei | 0.20 | -2.33 | 0.00 | 0.00 |
| 212368_at   | ZNF292  | zinc finger protei | 0.15 | -2.72 | 0.00 | 0.00 |
| 203521_s_at | ZNF318  | zinc finger protei | 0.32 | -1.63 | 0.00 | 0.00 |
| 222016_s_at | ZNF323  | zinc finger protei | 5.45 | 2.45  | 0.00 | 0.00 |
| 215358_x_at | ZNF37B  | zinc finger protei | 0.27 | -1.89 | 0.00 | 0.00 |
| 215429_s_at | ZNF428  | zinc finger protei | 5.09 | 2.35  | 0.00 | 0.00 |
| 222136_x_at | ZNF43   | zinc finger protei | 0.30 | -1.74 | 0.00 | 0.00 |
| 215892_at   | ZNF440  | zinc finger protei | 0.22 | -2.21 | 0.00 | 0.00 |
| 213124_at   | ZNF473  | zinc finger protei | 3.07 | 1.62  | 0.00 | 0.00 |

|             |         |                    |        |       |      |      |
|-------------|---------|--------------------|--------|-------|------|------|
| 204291_at   | ZNF518A | zinc finger protei | 0.16   | -2.61 | 0.00 | 0.00 |
| 211721_s_at | ZNF551  | zinc finger protei | 0.17   | -2.56 | 0.00 | 0.00 |
| 217627_at   | ZNF573  | zinc finger protei | 0.12   | -3.04 | 0.00 | 0.00 |
| 205594_at   | ZNF652  | zinc finger protei | 0.10   | -3.35 | 0.00 | 0.00 |
| 206180_x_at | ZNF747  | zinc finger protei | 5.89   | 2.56  | 0.00 | 0.00 |
| 219995_s_at | ZNF750  | zinc finger protei | 0.20   | -2.31 | 0.00 | 0.00 |
| 219781_s_at | ZNF771  | zinc finger protei | 8.61   | 3.11  | 0.00 | 0.00 |
| 214138_at   | ZNF79   | zinc finger protei | 3.86   | 1.95  | 0.00 | 0.00 |
| 60794_f_at  | ZNF814  | zinc finger protei | 0.31   | -1.68 | 0.00 | 0.00 |
| 219050_s_at | ZNHIT2  | zinc finger, HIT t | 3.79   | 1.92  | 0.00 | 0.00 |
| 218312_s_at | ZSCAN18 | zinc finger and S  | 0.30   | -1.76 | 0.00 | 0.00 |
| 217593_at   | ZSCAN18 | zinc finger and S  | 0.16   | -2.65 | 0.00 | 0.00 |
| 214580_x_at |         |                    | 281.05 | 8.14  | 0.00 | 0.00 |
| 210413_x_at |         |                    | 37.70  | 5.24  | 0.00 | 0.00 |
| 208539_x_at |         |                    | 30.87  | 4.95  | 0.00 | 0.00 |
| 215504_x_at |         |                    | 10.90  | 3.45  | 0.00 | 0.00 |
| 214463_x_at |         |                    | 8.92   | 3.16  | 0.00 | 0.00 |
| 218822_s_at |         |                    | 8.68   | 3.12  | 0.00 | 0.00 |
| 216745_x_at |         |                    | 8.67   | 3.12  | 0.00 | 0.00 |
| 217619_x_at |         |                    | 7.02   | 2.81  | 0.00 | 0.00 |
| 222114_x_at |         |                    | 5.84   | 2.55  | 0.00 | 0.00 |
| 219489_s_at |         |                    | 5.59   | 2.48  | 0.00 | 0.00 |
| 208580_x_at |         |                    | 5.43   | 2.44  | 0.00 | 0.00 |
| 216474_x_at |         |                    | 5.39   | 2.43  | 0.00 | 0.00 |
| 211691_x_at |         |                    | 5.34   | 2.42  | 0.00 | 0.00 |
| 205114_s_at |         |                    | 5.20   | 2.38  | 0.00 | 0.00 |
| 216499_at   |         |                    | 4.85   | 2.28  | 0.00 | 0.00 |
| 57540_at    |         |                    | 4.85   | 2.28  | 0.00 | 0.00 |
| 216535_at   |         |                    | 4.59   | 2.20  | 0.00 | 0.00 |
| 209372_x_at |         |                    | 4.40   | 2.14  | 0.00 | 0.00 |
| 217516_x_at |         |                    | 4.39   | 2.13  | 0.00 | 0.00 |
| 217055_x_at |         |                    | 4.14   | 2.05  | 0.00 | 0.00 |
| 216565_x_at |         |                    | 4.09   | 2.03  | 0.00 | 0.00 |
| 205717_x_at |         |                    | 4.05   | 2.02  | 0.00 | 0.00 |
| 216554_s_at |         |                    | 3.89   | 1.96  | 0.00 | 0.00 |
| 202632_at   |         |                    | 3.86   | 1.95  | 0.00 | 0.00 |
| 216694_at   |         |                    | 3.82   | 1.93  | 0.00 | 0.00 |
| 213690_s_at |         |                    | 3.82   | 1.93  | 0.00 | 0.00 |
| 213655_at   |         |                    | 3.68   | 1.88  | 0.00 | 0.00 |
| 213689_x_at |         |                    | 3.58   | 1.84  | 0.00 | 0.00 |
| 210474_s_at |         |                    | 3.57   | 1.84  | 0.00 | 0.00 |
| 217981_s_at |         |                    | 3.39   | 1.76  | 0.00 | 0.00 |
| 216138_at   |         |                    | 3.38   | 1.76  | 0.00 | 0.00 |
| 221792_at   |         |                    | 3.33   | 1.74  | 0.00 | 0.00 |
| 215489_x_at |         |                    | 3.32   | 1.73  | 0.00 | 0.00 |
| 215949_x_at |         |                    | 3.31   | 1.73  | 0.00 | 0.00 |
| 213808_at   |         |                    | 3.30   | 1.72  | 0.00 | 0.00 |
| 216371_at   |         |                    | 3.29   | 1.72  | 0.00 | 0.00 |

|             |      |       |      |      |
|-------------|------|-------|------|------|
| 216112_at   | 3.22 | 1.69  | 0.00 | 0.00 |
| 205144_at   | 3.18 | 1.67  | 0.00 | 0.00 |
| 220167_s_at | 3.16 | 1.66  | 0.00 | 0.00 |
| 210387_at   | 3.15 | 1.65  | 0.00 | 0.00 |
| 215353_at   | 3.14 | 1.65  | 0.00 | 0.00 |
| 216043_x_at | 3.12 | 1.64  | 0.00 | 0.00 |
| 206889_at   | 3.05 | 1.61  | 0.00 | 0.00 |
| 208811_s_at | 3.05 | 1.61  | 0.00 | 0.00 |
| 221715_at   | 3.03 | 1.60  | 0.00 | 0.00 |
| 216542_x_at | 3.03 | 1.60  | 0.00 | 0.00 |
| 216853_x_at | 3.01 | 1.59  | 0.00 | 0.00 |
| 210598_at   | 0.33 | -1.59 | 0.00 | 0.00 |
| 222365_at   | 0.33 | -1.59 | 0.00 | 0.00 |
| 217679_x_at | 0.33 | -1.59 | 0.00 | 0.00 |
| 220987_s_at | 0.33 | -1.60 | 0.00 | 0.00 |
| 205955_at   | 0.33 | -1.60 | 0.00 | 0.00 |
| 217621_at   | 0.33 | -1.61 | 0.00 | 0.00 |
| 31799_at    | 0.33 | -1.61 | 0.00 | 0.00 |
| 207953_at   | 0.33 | -1.62 | 0.00 | 0.00 |
| 220905_at   | 0.32 | -1.62 | 0.00 | 0.00 |
| 222319_at   | 0.32 | -1.63 | 0.00 | 0.00 |
| 217713_x_at | 0.32 | -1.65 | 0.00 | 0.00 |
| 217317_s_at | 0.32 | -1.66 | 0.00 | 0.00 |
| 222277_at   | 0.32 | -1.66 | 0.00 | 0.00 |
| 215370_at   | 0.32 | -1.67 | 0.00 | 0.00 |
| 213648_at   | 0.31 | -1.68 | 0.00 | 0.00 |
| 215147_at   | 0.31 | -1.68 | 0.00 | 0.00 |
| 216022_at   | 0.31 | -1.68 | 0.00 | 0.00 |
| 215802_at   | 0.31 | -1.68 | 0.00 | 0.00 |
| 220809_at   | 0.31 | -1.69 | 0.00 | 0.00 |
| 220912_at   | 0.31 | -1.70 | 0.00 | 0.00 |
| 206655_s_at | 0.30 | -1.72 | 0.00 | 0.00 |
| 222344_at   | 0.30 | -1.72 | 0.00 | 0.00 |
| 222335_at   | 0.30 | -1.73 | 0.00 | 0.00 |
| 216000_at   | 0.30 | -1.73 | 0.00 | 0.00 |
| 217617_at   | 0.30 | -1.73 | 0.00 | 0.00 |
| 209084_s_at | 0.30 | -1.75 | 0.00 | 0.00 |
| 214871_x_at | 0.30 | -1.75 | 0.00 | 0.00 |
| 221833_at   | 0.29 | -1.78 | 0.00 | 0.00 |
| 206548_at   | 0.29 | -1.81 | 0.00 | 0.00 |
| 216214_at   | 0.29 | -1.81 | 0.00 | 0.00 |
| 215059_at   | 0.29 | -1.81 | 0.00 | 0.00 |
| 215928_at   | 0.29 | -1.81 | 0.00 | 0.00 |
| 222149_x_at | 0.29 | -1.81 | 0.00 | 0.00 |
| 215164_at   | 0.28 | -1.82 | 0.00 | 0.00 |
| 215597_x_at | 0.28 | -1.83 | 0.00 | 0.00 |
| 216769_x_at | 0.28 | -1.83 | 0.00 | 0.00 |
| 217588_at   | 0.28 | -1.83 | 0.00 | 0.00 |



|             |      |       |      |      |
|-------------|------|-------|------|------|
| 222358_x_at | 0.28 | -1.83 | 0.00 | 0.00 |
| 217152_at   | 0.28 | -1.86 | 0.00 | 0.00 |
| 217519_at   | 0.28 | -1.86 | 0.00 | 0.00 |
| 217014_s_at | 0.27 | -1.88 | 0.00 | 0.00 |
| 221079_s_at | 0.27 | -1.87 | 0.00 | 0.00 |
| 215304_at   | 0.27 | -1.88 | 0.00 | 0.00 |
| 216783_at   | 0.27 | -1.90 | 0.00 | 0.00 |
| 222371_at   | 0.27 | -1.90 | 0.00 | 0.00 |
| 216211_at   | 0.27 | -1.91 | 0.00 | 0.00 |
| 214807_at   | 0.27 | -1.92 | 0.00 | 0.00 |
| 215956_at   | 0.27 | -1.92 | 0.00 | 0.00 |
| 216142_at   | 0.26 | -1.93 | 0.00 | 0.00 |
| 213156_at   | 0.26 | -1.93 | 0.00 | 0.00 |
| 214857_at   | 0.26 | -1.96 | 0.00 | 0.00 |
| 216069_at   | 0.25 | -1.98 | 0.00 | 0.00 |
| 216497_at   | 0.25 | -2.00 | 0.00 | 0.00 |
| 220696_at   | 0.25 | -2.00 | 0.00 | 0.00 |
| 213158_at   | 0.25 | -2.02 | 0.00 | 0.00 |
| 216411_s_at | 0.25 | -2.02 | 0.00 | 0.00 |
| 222341_x_at | 0.25 | -2.02 | 0.00 | 0.00 |
| 214375_at   | 0.24 | -2.06 | 0.00 | 0.00 |
| 222111_at   | 0.24 | -2.06 | 0.00 | 0.00 |
| 217659_at   | 0.24 | -2.07 | 0.00 | 0.00 |
| 222275_at   | 0.24 | -2.06 | 0.00 | 0.00 |
| 215172_at   | 0.23 | -2.10 | 0.00 | 0.00 |
| 215390_at   | 0.23 | -2.11 | 0.00 | 0.00 |
| 215576_at   | 0.23 | -2.12 | 0.00 | 0.00 |
| 206088_at   | 0.23 | -2.13 | 0.00 | 0.00 |
| 220612_at   | 0.23 | -2.14 | 0.00 | 0.00 |
| 203240_at   | 0.22 | -2.18 | 0.00 | 0.00 |
| 213931_at   | 0.22 | -2.19 | 0.00 | 0.00 |
| 221834_at   | 0.22 | -2.21 | 0.00 | 0.00 |
| 222290_at   | 0.22 | -2.22 | 0.00 | 0.00 |
| 215029_at   | 0.21 | -2.23 | 0.00 | 0.00 |
| 208154_at   | 0.21 | -2.25 | 0.00 | 0.00 |
| 217604_at   | 0.21 | -2.26 | 0.00 | 0.00 |
| 203852_s_at | 0.21 | -2.28 | 0.00 | 0.00 |
| 220969_s_at | 0.21 | -2.28 | 0.00 | 0.00 |
| 217137_x_at | 0.20 | -2.31 | 0.00 | 0.00 |
| 216173_at   | 0.20 | -2.33 | 0.00 | 0.00 |
| 217019_at   | 0.20 | -2.33 | 0.00 | 0.00 |
| 215287_at   | 0.20 | -2.34 | 0.00 | 0.00 |
| 215133_s_at | 0.20 | -2.34 | 0.00 | 0.00 |
| 217164_at   | 0.19 | -2.40 | 0.00 | 0.00 |
| 216756_at   | 0.19 | -2.41 | 0.00 | 0.00 |
| 222313_at   | 0.19 | -2.43 | 0.00 | 0.00 |
| 215212_at   | 0.18 | -2.50 | 0.00 | 0.00 |
| 215344_at   | 0.18 | -2.51 | 0.00 | 0.00 |

|             |      |       |      |      |
|-------------|------|-------|------|------|
| 222282_at   | 0.17 | -2.55 | 0.00 | 0.00 |
| 222214_at   | 0.17 | -2.58 | 0.00 | 0.00 |
| 216006_at   | 0.17 | -2.60 | 0.00 | 0.00 |
| 217671_at   | 0.17 | -2.60 | 0.00 | 0.00 |
| 214234_s_at | 0.16 | -2.67 | 0.00 | 0.00 |
| 217643_x_at | 0.16 | -2.69 | 0.00 | 0.00 |
| 214235_at   | 0.15 | -2.71 | 0.00 | 0.00 |
| 215629_s_at | 0.15 | -2.74 | 0.00 | 0.00 |
| 213686_at   | 0.15 | -2.75 | 0.00 | 0.00 |
| 215123_at   | 0.14 | -2.80 | 0.00 | 0.00 |
| 216278_at   | 0.14 | -2.80 | 0.00 | 0.00 |
| 215378_at   | 0.14 | -2.82 | 0.00 | 0.00 |
| 215322_at   | 0.14 | -2.84 | 0.00 | 0.00 |
| 217336_at   | 0.14 | -2.87 | 0.00 | 0.00 |
| 217536_x_at | 0.14 | -2.87 | 0.00 | 0.00 |
| 215626_at   | 0.14 | -2.88 | 0.00 | 0.00 |
| 213930_at   | 0.14 | -2.89 | 0.00 | 0.00 |
| 216527_at   | 0.14 | -2.89 | 0.00 | 0.00 |
| 215555_at   | 0.13 | -2.90 | 0.00 | 0.00 |
| 217353_at   | 0.13 | -2.90 | 0.00 | 0.00 |
| 222366_at   | 0.13 | -2.90 | 0.00 | 0.00 |
| 220728_at   | 0.13 | -2.98 | 0.00 | 0.00 |
| 215083_at   | 0.12 | -3.08 | 0.00 | 0.00 |
| 215768_at   | 0.12 | -3.12 | 0.00 | 0.00 |
| 215385_at   | 0.11 | -3.13 | 0.00 | 0.00 |
| 212913_at   | 0.11 | -3.16 | 0.00 | 0.00 |
| 220711_at   | 0.11 | -3.19 | 0.00 | 0.00 |
| 222308_x_at | 0.11 | -3.18 | 0.00 | 0.00 |
| 215599_at   | 0.11 | -3.24 | 0.00 | 0.00 |
| 222316_at   | 0.10 | -3.27 | 0.00 | 0.00 |
| 205728_at   | 0.10 | -3.29 | 0.00 | 0.00 |
| 213397_x_at | 0.10 | -3.30 | 0.00 | 0.00 |
| 205871_at   | 0.10 | -3.30 | 0.00 | 0.00 |
| 222368_at   | 0.10 | -3.32 | 0.00 | 0.00 |
| 220855_at   | 0.10 | -3.34 | 0.00 | 0.00 |
| 215392_at   | 0.10 | -3.36 | 0.00 | 0.00 |
| 214415_at   | 0.09 | -3.44 | 0.00 | 0.00 |
| 215635_at   | 0.08 | -3.64 | 0.00 | 0.00 |
| 216614_at   | 0.06 | -4.02 | 0.00 | 0.00 |
| 208498_s_at | 0.06 | -4.08 | 0.00 | 0.00 |
| 220038_at   | 0.06 | -4.12 | 0.00 | 0.00 |

**Table S4. SCC invasion vs. normal epidermis (FCH>3.0 and FDR<0.05)**

1325 up- and 1461 down-regulated probestes

| Probe       | Symbol  | Description         | FCH   | lgFCH | P    | fdr  | fdr  |
|-------------|---------|---------------------|-------|-------|------|------|------|
| 219574_at   |         | 1-Mar membrane-asso | 0.32  | -1.63 | 0.00 | 0.00 | 0.00 |
| 213256_at   |         | 3-Mar membrane-asso | 0.21  | -2.27 | 0.00 | 0.00 | 0.00 |
| 201737_s_at |         | 6-Mar membrane-asso | 0.09  | -3.43 | 0.00 | 0.00 | 0.00 |
| 200778_s_at |         | 2-Sep septin 2      | 3.09  | 1.63  | 0.00 | 0.00 | 0.00 |
| 208999_at   |         | 8-Sep septin 8      | 0.30  | -1.74 | 0.00 | 0.00 | 0.00 |
| 201307_at   |         | 11-Sep septin 11    | 3.25  | 1.70  | 0.01 | 0.01 | 0.01 |
| 217757_at   | A2M     | alpha-2-macrogli    | 5.41  | 2.44  | 0.00 | 0.00 | 0.00 |
| 219488_at   | A4GALT  | alpha 1,4-galact    | 3.77  | 1.91  | 0.00 | 0.00 | 0.00 |
| 205969_at   | AADAC   | arylacetamide de    | 0.16  | -2.62 | 0.00 | 0.00 | 0.00 |
| 201511_at   | AAMP    | angio-associater    | 3.16  | 1.66  | 0.00 | 0.00 | 0.00 |
| 214829_at   | AASS    | aminoadipate-se     | 0.32  | -1.62 | 0.00 | 0.00 | 0.00 |
| 205986_at   | AATK    | apoptosis-assoc     | 3.27  | 1.71  | 0.00 | 0.00 | 0.00 |
| 203504_s_at | ABCA1   | ATP-binding cas     | 0.28  | -1.82 | 0.00 | 0.00 | 0.00 |
| 220159_at   | ABCA11P | ATP-binding cas     | 0.31  | -1.70 | 0.00 | 0.00 | 0.00 |
| 210082_at   | ABCA4   | ATP-binding cas     | 7.64  | 2.93  | 0.00 | 0.00 | 0.00 |
| 213353_at   | ABCA5   | ATP-binding cas     | 0.11  | -3.16 | 0.00 | 0.00 | 0.00 |
| 204719_at   | ABCA8   | ATP-binding cas     | 0.24  | -2.09 | 0.00 | 0.00 | 0.00 |
| 208161_s_at | ABCC3   | ATP-binding cas     | 0.33  | -1.59 | 0.00 | 0.00 | 0.00 |
| 203196_at   | ABCC4   | ATP-binding cas     | 0.18  | -2.51 | 0.00 | 0.00 | 0.00 |
| 205142_x_at | ABCD1   | ATP-binding cas     | 3.21  | 1.68  | 0.00 | 0.00 | 0.00 |
| 202850_at   | ABCD3   | ATP-binding cas     | 0.28  | -1.84 | 0.00 | 0.00 | 0.00 |
| 203981_s_at | ABCD4   | ATP-binding cas     | 0.33  | -1.61 | 0.00 | 0.00 | 0.00 |
| 209247_s_at | ABCF2   | ATP-binding cas     | 3.82  | 1.94  | 0.00 | 0.00 | 0.00 |
| 207623_at   | ABCF2   | ATP-binding cas     | 0.13  | -2.99 | 0.00 | 0.00 | 0.00 |
| 207593_at   | ABCG4   | ATP-binding cas     | 3.48  | 1.80  | 0.00 | 0.00 | 0.00 |
| 205566_at   | ABHD2   | abhydrolase don     | 4.80  | 2.26  | 0.00 | 0.00 | 0.00 |
| 221679_s_at | ABHD6   | abhydrolase don     | 0.26  | -1.96 | 0.00 | 0.00 | 0.00 |
| 209028_s_at | ABI1    | abl-interactor 1    | 0.31  | -1.69 | 0.00 | 0.00 | 0.00 |
| 202025_x_at | ACAA1   | acetyl-Coenzym      | 4.14  | 2.05  | 0.00 | 0.00 | 0.00 |
| 43427_at    | ACACB   | acetyl-Coenzym      | 0.33  | -1.59 | 0.00 | 0.00 | 0.00 |
| 49452_at    | ACACB   | acetyl-Coenzym      | 0.25  | -1.98 | 0.00 | 0.00 | 0.00 |
| 206069_s_at | ACADL   | acyl-Coenzyme ,     | 0.16  | -2.61 | 0.00 | 0.00 | 0.00 |
| 206068_s_at | ACADL   | acyl-Coenzyme ,     | 0.04  | -4.54 | 0.00 | 0.00 | 0.00 |
| 205355_at   | ACADSB  | acyl-Coenzyme ,     | 0.19  | -2.42 | 0.00 | 0.00 | 0.00 |
| 212476_at   | ACAP2   | ArfGAP with coil    | 0.29  | -1.77 | 0.00 | 0.00 | 0.00 |
| 202323_s_at | ACBD3   | acyl-Coenzyme ,     | 0.29  | -1.80 | 0.00 | 0.00 | 0.00 |
| 210337_s_at | ACLY    | ATP citrate lyase   | 5.08  | 2.34  | 0.00 | 0.00 | 0.00 |
| 200793_s_at | ACO2    | aconitase 2, mitc   | 4.26  | 2.09  | 0.00 | 0.00 | 0.00 |
| 214763_at   | ACOT11  | acyl-CoA thioest    | 10.54 | 3.40  | 0.00 | 0.00 | 0.00 |
| 221641_s_at | ACOT9   | acyl-CoA thioest    | 3.67  | 1.88  | 0.00 | 0.00 | 0.00 |
| 215227_x_at | ACP1    | acid phosphatas     | 3.03  | 1.60  | 0.00 | 0.00 | 0.00 |

|             |          |                   |       |       |      |      |
|-------------|----------|-------------------|-------|-------|------|------|
| 206465_at   | ACSBG1   | acyl-CoA synthe   | 0.15  | -2.71 | 0.00 | 0.00 |
| 201661_s_at | ACSL3    | acyl-CoA synthe   | 0.28  | -1.84 | 0.00 | 0.00 |
| 202422_s_at | ACSL4    | acyl-CoA synthe   | 0.28  | -1.85 | 0.00 | 0.00 |
| 208636_at   | ACTN1    | actinin, alpha 1  | 14.27 | 3.84  | 0.00 | 0.00 |
| 208637_x_at | ACTN1    | actinin, alpha 1  | 8.62  | 3.11  | 0.00 | 0.00 |
| 211160_x_at | ACTN1    | actinin, alpha 1  | 8.06  | 3.01  | 0.00 | 0.00 |
| 205209_at   | ACVR1B   | activin A recepto | 0.19  | -2.43 | 0.00 | 0.00 |
| 202604_x_at | ADAM10   | ADAM metallope    | 3.93  | 1.98  | 0.00 | 0.00 |
| 206046_at   | ADAM23   | ADAM metallope    | 11.11 | 3.47  | 0.00 | 0.00 |
| 208268_at   | ADAM28   | ADAM metallope    | 0.30  | -1.76 | 0.00 | 0.00 |
| 220208_at   | ADAMTS13 | ADAM metallope    | 4.15  | 2.05  | 0.00 | 0.00 |
| 220705_s_at | ADAMTS7  | ADAM metallope    | 3.04  | 1.60  | 0.00 | 0.00 |
| 213217_at   | ADCY2    | adenylate cyclas  | 0.18  | -2.51 | 0.00 | 0.00 |
| 204497_at   | ADCY9    | adenylate cyclas  | 3.80  | 1.93  | 0.00 | 0.00 |
| 204498_s_at | ADCY9    | adenylate cyclas  | 3.74  | 1.90  | 0.00 | 0.00 |
| 201034_at   | ADD3     | adducin 3 (gamn   | 0.32  | -1.66 | 0.00 | 0.00 |
| 201753_s_at | ADD3     | adducin 3 (gamn   | 0.27  | -1.92 | 0.00 | 0.00 |
| 201752_s_at | ADD3     | adducin 3 (gamn   | 0.24  | -2.05 | 0.00 | 0.00 |
| 205882_x_at | ADD3     | adducin 3 (gamn   | 0.23  | -2.13 | 0.00 | 0.00 |
| 202912_at   | ADM      | adrenomedullin    | 4.52  | 2.18  | 0.00 | 0.00 |
| 220538_at   | ADM2     | adrenomedullin ;  | 5.40  | 2.43  | 0.00 | 0.00 |
| 38447_at    | ADRBK1   | adrenergic, beta  | 11.31 | 3.50  | 0.00 | 0.00 |
| 201402_at   | ADRBK1   | adrenergic, beta  | 8.72  | 3.13  | 0.00 | 0.00 |
| 201792_at   | AEBP1    | AE binding prote  | 3.92  | 1.97  | 0.00 | 0.00 |
| 201924_at   | AFF1     | AF4/FMR2 famil    | 0.27  | -1.89 | 0.00 | 0.00 |
| 222362_at   | AGFG2    | ArfGAP with FG    | 0.27  | -1.88 | 0.00 | 0.00 |
| 208042_at   | AGGF1    | angiogenic facto  | 0.27  | -1.87 | 0.00 | 0.00 |
| 219693_at   | AGPAT4   | 1-acylglycerol-3- | 3.01  | 1.59  | 0.00 | 0.00 |
| 200903_s_at | AHCY     | adenosylhomocy    | 3.86  | 1.95  | 0.00 | 0.00 |
| 220016_at   | AHNAK    | AHNAK nucleop     | 0.21  | -2.25 | 0.00 | 0.00 |
| 209901_x_at | AIF1     | allograft inflam  | 3.16  | 1.66  | 0.00 | 0.00 |
| 206513_at   | AIM2     | absent in melanc  | 14.61 | 3.87  | 0.00 | 0.00 |
| 215789_s_at | AJAP1    | adherens junctio  | 4.85  | 2.28  | 0.00 | 0.00 |
| 206460_at   | AJAP1    | adherens junctio  | 3.18  | 1.67  | 0.00 | 0.00 |
| 208967_s_at | AK2      | adenylate kinase  | 3.15  | 1.66  | 0.00 | 0.00 |
| 208325_s_at | AKAP13   | A kinase (PRKA,   | 0.30  | -1.73 | 0.00 | 0.00 |
| 222024_s_at | AKAP13   | A kinase (PRKA,   | 0.21  | -2.23 | 0.00 | 0.00 |
| 205771_s_at | AKAP7    | A kinase (PRKA,   | 0.18  | -2.48 | 0.00 | 0.00 |
| 215741_x_at | AKAP8L   | A kinase (PRKA,   | 4.43  | 2.15  | 0.00 | 0.00 |
| 215483_at   | AKAP9    | A kinase (PRKA,   | 0.08  | -3.57 | 0.00 | 0.00 |
| 201272_at   | AKR1B1   | aldo-keto reduct  | 3.04  | 1.61  | 0.00 | 0.00 |
| 206561_s_at | AKR1B10  | aldo-keto reduct  | 17.57 | 4.14  | 0.00 | 0.00 |
| 218487_at   | ALAD     | aminolevulinate,  | 0.33  | -1.59 | 0.00 | 0.00 |
| 205633_s_at | ALAS1    | aminolevulinate,  | 3.36  | 1.75  | 0.00 | 0.00 |
| 201951_at   | ALCAM    | activated leukoc  | 0.17  | -2.60 | 0.00 | 0.00 |
| 217791_s_at | ALDH18A1 | aldehyde dehydr   | 3.29  | 1.72  | 0.00 | 0.00 |
| 203180_at   | ALDH1A3  | aldehyde dehydr   | 4.38  | 2.13  | 0.00 | 0.00 |
| 202053_s_at | ALDH3A2  | aldehyde dehydr   | 0.23  | -2.13 | 0.00 | 0.00 |

|             |          |                    |       |       |      |      |
|-------------|----------|--------------------|-------|-------|------|------|
| 202054_s_at | ALDH3A2  | aldehyde dehydr    | 0.19  | -2.39 | 0.00 | 0.00 |
| 211552_s_at | ALDH4A1  | aldehyde dehydr    | 5.16  | 2.37  | 0.00 | 0.00 |
| 203608_at   | ALDH5A1  | aldehyde dehydr    | 0.20  | -2.33 | 0.00 | 0.00 |
| 220148_at   | ALDH8A1  | aldehyde dehydr    | 0.26  | -1.96 | 0.00 | 0.00 |
| 218444_at   | ALG12    | asparagine-link    | 3.45  | 1.79  | 0.00 | 0.00 |
| 205583_s_at | ALG13    | asparagine-link    | 0.28  | -1.82 | 0.00 | 0.00 |
| 205584_at   | ALG13    | asparagine-link    | 0.27  | -1.90 | 0.00 | 0.00 |
| 214707_x_at | ALMS1    | Alstrom syndrom    | 0.27  | -1.92 | 0.00 | 0.00 |
| 207206_s_at | ALOX12   | arachidonate 12-   | 0.14  | -2.84 | 0.00 | 0.00 |
| 206714_at   | ALOX15B  | arachidonate 15-   | 3.08  | 1.62  | 0.01 | 0.01 |
| 222383_s_at | ALOXE3   | arachidonate lip   | 0.13  | -2.98 | 0.00 | 0.00 |
| 201196_s_at | AMD1     | adenosylmethior    | 3.15  | 1.66  | 0.00 | 0.00 |
| 202204_s_at | AMFR     | autocrine motility | 5.02  | 2.33  | 0.00 | 0.00 |
| 202203_s_at | AMFR     | autocrine motility | 0.24  | -2.05 | 0.00 | 0.00 |
| 222108_at   | AMIGO2   | adhesion molecul   | 24.55 | 4.62  | 0.00 | 0.00 |
| 203002_at   | AMOTL2   | angiomotin like 2  | 0.21  | -2.26 | 0.00 | 0.00 |
| 218555_at   | ANAPC2   | anaphase promc     | 0.28  | -1.86 | 0.00 | 0.00 |
| 205141_at   | ANG      | angiogenin, ribos  | 0.17  | -2.59 | 0.00 | 0.00 |
| 221825_at   | ANGEL2   | angel homolog 2    | 0.33  | -1.60 | 0.00 | 0.00 |
| 221009_s_at | ANGPTL4  | angiopoietin-like  | 5.49  | 2.46  | 0.00 | 0.00 |
| 215314_at   | ANK3     | ankyrin 3, node c  | 0.24  | -2.08 | 0.00 | 0.00 |
| 218769_s_at | ANKRA2   | ankyrin repeat, fi | 0.23  | -2.11 | 0.00 | 0.00 |
| 218093_s_at | ANKRD10  | ankyrin repeat di  | 0.29  | -1.77 | 0.00 | 0.00 |
| 212289_at   | ANKRD12  | ankyrin repeat di  | 0.31  | -1.68 | 0.00 | 0.00 |
| 216563_at   | ANKRD12  | ankyrin repeat di  | 0.27  | -1.88 | 0.00 | 0.00 |
| 216550_x_at | ANKRD12  | ankyrin repeat di  | 0.22  | -2.20 | 0.00 | 0.00 |
| 214723_x_at | ANKRD36  | ankyrin repeat di  | 0.09  | -3.54 | 0.00 | 0.00 |
| 220940_at   | ANKRD36B | ankyrin repeat di  | 0.20  | -2.33 | 0.00 | 0.00 |
| 212731_at   | ANKRD46  | ankyrin repeat di  | 0.26  | -1.94 | 0.00 | 0.00 |
| 218804_at   | ANO1     | anoctamin 1, cal   | 0.19  | -2.41 | 0.00 | 0.00 |
| 201012_at   | ANXA1    | annexin A1         | 4.35  | 2.12  | 0.00 | 0.00 |
| 209369_at   | ANXA3    | annexin A3         | 10.94 | 3.45  | 0.00 | 0.00 |
| 211712_s_at | ANXA9    | annexin A9         | 0.13  | -2.95 | 0.00 | 0.00 |
| 218261_at   | AP1M2    | adaptor-related f  | 3.21  | 1.68  | 0.00 | 0.00 |
| 200615_s_at | AP2B1    | adaptor-related f  | 7.28  | 2.86  | 0.00 | 0.00 |
| 200613_at   | AP2M1    | adaptor-related f  | 4.39  | 2.13  | 0.00 | 0.00 |
| 209870_s_at | APBA2    | amyloid beta (A4   | 3.95  | 1.98  | 0.00 | 0.00 |
| 211404_s_at | APLP2    | amyloid beta (A4   | 5.82  | 2.54  | 0.00 | 0.00 |
| 208702_x_at | APLP2    | amyloid beta (A4   | 4.06  | 2.02  | 0.00 | 0.00 |
| 214875_x_at | APLP2    | amyloid beta (A4   | 3.58  | 1.84  | 0.00 | 0.00 |
| 210873_x_at | APOBEC3A | apolipoprotein B   | 25.04 | 4.65  | 0.00 | 0.00 |
| 204205_at   | APOBEC3G | apolipoprotein B   | 6.96  | 2.80  | 0.00 | 0.00 |
| 215579_at   | APOBEC3G | apolipoprotein B   | 4.10  | 2.04  | 0.00 | 0.00 |
| 212884_x_at | APOE     | apolipoprotein E   | 0.33  | -1.60 | 0.00 | 0.00 |
| 203382_s_at | APOE     | apolipoprotein E   | 0.18  | -2.44 | 0.00 | 0.00 |
| 203381_s_at | APOE     | apolipoprotein E   | 0.18  | -2.52 | 0.00 | 0.00 |
| 209546_s_at | APOL1    | apolipoprotein L,  | 5.06  | 2.34  | 0.00 | 0.00 |
| 219716_at   | APOL6    | apolipoprotein L,  | 5.54  | 2.47  | 0.00 | 0.00 |

|             |          |                    |       |       |      |      |
|-------------|----------|--------------------|-------|-------|------|------|
| 221620_s_at | APOO     | apolipoprotein O   | 4.49  | 2.17  | 0.00 | 0.00 |
| 214953_s_at | APP      | amyloid beta (A4   | 3.88  | 1.96  | 0.00 | 0.00 |
| 218218_at   | APPL2    | adaptor protein,   | 0.12  | -3.02 | 0.00 | 0.00 |
| 212583_at   | AQR      | aquarius homolo    | 0.30  | -1.76 | 0.00 | 0.00 |
| 214102_at   | ARAP2    | ArfGAP with Rhc    | 0.16  | -2.66 | 0.00 | 0.00 |
| 205239_at   | AREG     | amphiregulin       | 26.87 | 4.75  | 0.00 | 0.00 |
| 202955_s_at | ARFGEF1  | ADP-ribosylation   | 4.70  | 2.23  | 0.00 | 0.00 |
| 218098_at   | ARFGEF2  | ADP-ribosylation   | 0.26  | -1.94 | 0.00 | 0.00 |
| 218067_s_at | ARGLU1   | arginine and glut  | 0.24  | -2.07 | 0.00 | 0.00 |
| 207606_s_at | ARHGAP12 | Rho GTPase act     | 0.27  | -1.91 | 0.00 | 0.00 |
| 206298_at   | ARHGAP22 | Rho GTPase act     | 3.62  | 1.86  | 0.00 | 0.00 |
| 221030_s_at | ARHGAP24 | Rho GTPase act     | 0.30  | -1.72 | 0.00 | 0.00 |
| 204882_at   | ARHGAP25 | Rho GTPase act     | 5.82  | 2.54  | 0.00 | 0.00 |
| 203910_at   | ARHGAP29 | Rho GTPase act     | 0.20  | -2.33 | 0.00 | 0.00 |
| 217936_at   | ARHGAP5  | Rho GTPase act     | 0.27  | -1.90 | 0.00 | 0.00 |
| 218964_at   | ARID3B   | AT rich interactiv | 3.38  | 1.76  | 0.00 | 0.00 |
| 220468_at   | ARL14    | ADP-ribosylation   | 9.32  | 3.22  | 0.00 | 0.00 |
| 202092_s_at | ARL2BP   | ADP-ribosylation   | 3.31  | 1.73  | 0.00 | 0.00 |
| 202208_s_at | ARL4C    | ADP-ribosylation   | 3.36  | 1.75  | 0.00 | 0.00 |
| 219094_at   | ARMC8    | armadillo repeat   | 0.24  | -2.06 | 0.00 | 0.00 |
| 218694_at   | ARMCX1   | armadillo repeat   | 0.24  | -2.07 | 0.00 | 0.00 |
| 210971_s_at | ARNTL    | aryl hydrocarbon   | 0.20  | -2.33 | 0.00 | 0.00 |
| 220658_s_at | ARNTL2   | aryl hydrocarbon   | 4.32  | 2.11  | 0.00 | 0.00 |
| 201954_at   | ARPC1B   | actin related proi | 12.43 | 3.64  | 0.00 | 0.00 |
| 217818_s_at | ARPC4    | actin related proi | 3.75  | 1.91  | 0.00 | 0.00 |
| 205784_x_at | ARVCF    | armadillo repeat   | 3.62  | 1.86  | 0.00 | 0.00 |
| 210980_s_at | ASAH1    | N-acylsphingosir   | 0.33  | -1.60 | 0.00 | 0.00 |
| 219103_at   | ASAP3    | ArfGAP with SH:    | 0.18  | -2.44 | 0.00 | 0.00 |
| 203427_at   | ASF1A    | ASF1 anti-silenc   | 0.17  | -2.58 | 0.00 | 0.00 |
| 218115_at   | ASF1B    | ASF1 anti-silenc   | 4.00  | 2.00  | 0.00 | 0.00 |
| 206030_at   | ASPA     | aspartoacylase (   | 0.18  | -2.45 | 0.00 | 0.00 |
| 209135_at   | ASPH     | aspartate beta-h   | 0.30  | -1.75 | 0.00 | 0.00 |
| 219918_s_at | ASPM     | asp (abnormal sj   | 0.33  | -1.62 | 0.01 | 0.02 |
| 213387_at   | ATAD2B   | ATPase family, /   | 0.23  | -2.13 | 0.00 | 0.00 |
| 219068_x_at | ATAD3A   | ATPase family, /   | 4.72  | 2.24  | 0.00 | 0.00 |
| 217550_at   | ATF6     | activating transc  | 0.30  | -1.76 | 0.00 | 0.00 |
| 216197_at   | ATF7IP   | activating transc  | 0.14  | -2.83 | 0.00 | 0.00 |
| 204833_at   | ATG12    | ATG12 autophag     | 3.83  | 1.94  | 0.00 | 0.00 |
| 219164_s_at | ATG2B    | ATG2 autophagy     | 0.21  | -2.29 | 0.00 | 0.00 |
| 40489_at    | ATN1     | atrophin 1         | 5.88  | 2.56  | 0.00 | 0.00 |
| 203454_s_at | ATOX1    | ATX1 antioxidant   | 4.93  | 2.30  | 0.00 | 0.00 |
| 220920_at   | ATP10B   | ATPase, class V    | 0.27  | -1.87 | 0.00 | 0.00 |
| 213582_at   | ATP11A   | ATPase, class V    | 0.19  | -2.42 | 0.00 | 0.00 |
| 207367_at   | ATP12A   | ATPase, H+/K+ :    | 17.76 | 4.15  | 0.00 | 0.00 |
| 201243_s_at | ATP1B1   | ATPase, Na+/K+     | 3.34  | 1.74  | 0.01 | 0.01 |
| 209281_s_at | ATP2B1   | ATPase, Ca++ tr    | 0.30  | -1.75 | 0.00 | 0.00 |
| 215716_s_at | ATP2B1   | ATPase, Ca++ tr    | 0.17  | -2.57 | 0.00 | 0.00 |
| 212930_at   | ATP2B1   | ATPase, Ca++ tr    | 0.12  | -3.06 | 0.00 | 0.00 |

|             |          |                    |       |       |      |      |
|-------------|----------|--------------------|-------|-------|------|------|
| 206043_s_at | ATP2C2   | ATPase, Ca++ tr    | 0.22  | -2.18 | 0.00 | 0.00 |
| 217603_at   | ATP6V0A2 | ATPase, H+ tran    | 0.28  | -1.86 | 0.00 | 0.00 |
| 200078_s_at | ATP6V0B  | ATPase, H+ tran    | 3.32  | 1.73  | 0.00 | 0.00 |
| 212041_at   | ATP6V0D1 | ATPase, H+ tran    | 3.21  | 1.68  | 0.00 | 0.00 |
| 200096_s_at | ATP6V0E1 | ATPase, H+ tran    | 3.93  | 1.98  | 0.00 | 0.00 |
| 213587_s_at | ATP6V0E2 | ATPase, H+ tran    | 0.17  | -2.59 | 0.00 | 0.00 |
| 205197_s_at | ATP7A    | ATPase, Cu++ tr    | 0.22  | -2.21 | 0.00 | 0.00 |
| 205198_s_at | ATP7A    | ATPase, Cu++ tr    | 0.14  | -2.86 | 0.00 | 0.00 |
| 213106_at   | ATP8A1   | ATPase, aminop     | 0.07  | -3.77 | 0.00 | 0.00 |
| 208859_s_at | ATRX     | alpha thalasse     | 0.31  | -1.69 | 0.00 | 0.00 |
| 208860_s_at | ATRX     | alpha thalasse     | 0.27  | -1.89 | 0.00 | 0.00 |
| 209964_s_at | ATXN7    | ataxin 7           | 0.16  | -2.64 | 0.00 | 0.00 |
| 204516_at   | ATXN7    | ataxin 7           | 0.08  | -3.59 | 0.00 | 0.00 |
| 205539_at   | AVIL     | advillin           | 0.21  | -2.27 | 0.00 | 0.00 |
| 208260_at   | AVPR1B   | arginine vasopre   | 8.66  | 3.11  | 0.00 | 0.00 |
| 209309_at   | AZGP1    | alpha-2-glycoprc   | 0.08  | -3.64 | 0.00 | 0.00 |
| 204856_at   | B3GNT3   | UDP-GlcNAc:be      | 3.84  | 1.94  | 0.00 | 0.00 |
| 213589_s_at | B3GNTL1  | UDP-GlcNAc:be      | 0.25  | -1.98 | 0.00 | 0.00 |
| 210540_s_at | B4GALT4  | UDP-Gal:betaGl     | 0.29  | -1.79 | 0.00 | 0.00 |
| 221484_at   | B4GALT5  | UDP-Gal:betaGl     | 4.14  | 2.05  | 0.00 | 0.00 |
| 209364_at   | BAD      | BCL2-associater    | 3.16  | 1.66  | 0.00 | 0.00 |
| 202984_s_at | BAG5     | BCL2-associater    | 0.15  | -2.79 | 0.00 | 0.00 |
| 203728_at   | BAK1     | BCL2-antagonisi    | 3.55  | 1.83  | 0.00 | 0.00 |
| 205345_at   | BARD1    | BRCA1 associat     | 0.13  | -2.91 | 0.00 | 0.00 |
| 210419_at   | BARX2    | BARX homeobo:      | 3.30  | 1.72  | 0.00 | 0.00 |
| 202391_at   | BASP1    | brain abundant, i  | 10.50 | 3.39  | 0.00 | 0.00 |
| 200041_s_at | BAT1     | HLA-B associate    | 0.29  | -1.80 | 0.00 | 0.00 |
| 212384_at   | BAT1     | HLA-B associate    | 0.27  | -1.90 | 0.00 | 0.00 |
| 201355_s_at | BAZ2A    | bromodomain ac     | 3.26  | 1.71  | 0.00 | 0.00 |
| 91920_at    | BCAN     | brevican           | 6.23  | 2.64  | 0.00 | 0.00 |
| 204032_at   | BCAR3    | breast cancer an   | 0.27  | -1.87 | 0.00 | 0.00 |
| 219498_s_at | BCL11A   | B-cell CLL/lymph   | 0.23  | -2.11 | 0.00 | 0.00 |
| 219497_s_at | BCL11A   | B-cell CLL/lymph   | 0.20  | -2.36 | 0.00 | 0.00 |
| 203685_at   | BCL2     | B-cell CLL/lymph   | 0.09  | -3.47 | 0.00 | 0.00 |
| 203140_at   | BCL6     | B-cell CLL/lymph   | 0.32  | -1.66 | 0.00 | 0.00 |
| 215990_s_at | BCL6     | B-cell CLL/lymph   | 0.15  | -2.70 | 0.00 | 0.00 |
| 219072_at   | BCL7C    | B-cell CLL/lymph   | 3.17  | 1.67  | 0.00 | 0.00 |
| 204129_at   | BCL9     | B-cell CLL/lymph   | 3.71  | 1.89  | 0.00 | 0.00 |
| 214499_s_at | BCLAF1   | BCL2-associater    | 0.27  | -1.89 | 0.00 | 0.00 |
| 219433_at   | BCOR     | BCL6 co-repress    | 0.29  | -1.81 | 0.00 | 0.00 |
| 217223_s_at | BCR      | breakpoint cluste  | 4.14  | 2.05  | 0.00 | 0.00 |
| 202315_s_at | BCR      | breakpoint cluste  | 3.83  | 1.94  | 0.00 | 0.00 |
| 205870_at   | BDKRB2   | bradykinin recep   | 3.28  | 1.71  | 0.00 | 0.00 |
| 215440_s_at | BEX4     | brain expressed,   | 0.19  | -2.42 | 0.00 | 0.00 |
| 213709_at   | BHLHB9   | basic helix-loop-i | 0.33  | -1.59 | 0.00 | 0.00 |
| 206119_at   | BHMT     | betaine-homocys    | 3.06  | 1.61  | 0.00 | 0.00 |
| 211725_s_at | BID      | BH3 interacting c  | 10.26 | 3.36  | 0.00 | 0.00 |
| 204493_at   | BID      | BH3 interacting c  | 6.10  | 2.61  | 0.00 | 0.00 |

|             |           |                   |       |       |      |      |
|-------------|-----------|-------------------|-------|-------|------|------|
| 214439_x_at | BIN1      | bridging integrat | 7.63  | 2.93  | 0.00 | 0.00 |
| 202931_x_at | BIN1      | bridging integrat | 5.74  | 2.52  | 0.00 | 0.00 |
| 210201_x_at | BIN1      | bridging integrat | 3.72  | 1.89  | 0.00 | 0.00 |
| 219191_s_at | BIN2      | bridging integrat | 4.71  | 2.24  | 0.00 | 0.00 |
| 202179_at   | BLMH      | bleomycin hydro   | 0.21  | -2.25 | 0.00 | 0.00 |
| 206725_x_at | BMP1      | bone morphoger    | 4.76  | 2.25  | 0.00 | 0.00 |
| 205574_x_at | BMP1      | bone morphoger    | 3.11  | 1.64  | 0.00 | 0.00 |
| 207595_s_at | BMP1      | bone morphoger    | 3.10  | 1.63  | 0.00 | 0.00 |
| 205289_at   | BMP2      | bone morphoger    | 0.19  | -2.39 | 0.00 | 0.00 |
| 209591_s_at | BMP7      | bone morphoger    | 0.25  | -2.01 | 0.00 | 0.00 |
| 220203_at   | BMP8A     | bone morphoger    | 8.22  | 3.04  | 0.00 | 0.00 |
| 201848_s_at | BNIP3     | BCL2/adenoviru:   | 3.12  | 1.64  | 0.00 | 0.00 |
| 203502_at   | BPGM      | 2,3-bisphosphog   | 3.93  | 1.97  | 0.00 | 0.00 |
| 204520_x_at | BRD1      | bromodomain cc    | 0.25  | -1.98 | 0.00 | 0.00 |
| 215460_x_at | BRD1      | bromodomain cc    | 0.25  | -2.01 | 0.00 | 0.00 |
| 214820_at   | BRWD1     | bromodomain ar    | 0.28  | -1.83 | 0.00 | 0.00 |
| 218090_s_at | BRWD2     | bromodomain ar    | 0.31  | -1.67 | 0.00 | 0.00 |
| 208677_s_at | BSG       | basigin (Ok bloo  | 3.23  | 1.69  | 0.00 | 0.00 |
| 201641_at   | BST2      | bone marrow str   | 14.79 | 3.89  | 0.00 | 0.00 |
| 209430_at   | BTAF1     | BTAF1 RNA poly    | 0.21  | -2.26 | 0.00 | 0.00 |
| 202946_s_at | BTBD3     | BTB (POZ) domi    | 0.27  | -1.89 | 0.00 | 0.00 |
| 207326_at   | BTC       | betacellulin      | 0.04  | -4.63 | 0.00 | 0.00 |
| 215425_at   | BTG3      | BTG family, men   | 0.27  | -1.91 | 0.00 | 0.00 |
| 204821_at   | BTN3A3    | butyrophilin, sub | 0.29  | -1.76 | 0.00 | 0.00 |
| 38241_at    | BTN3A3    | butyrophilin, sub | 0.21  | -2.25 | 0.00 | 0.00 |
| 204901_at   | BTRC      | beta-transducin   | 5.09  | 2.35  | 0.00 | 0.00 |
| 209183_s_at | C10orf10  | chromosome 10     | 3.31  | 1.73  | 0.00 | 0.00 |
| 219953_s_at | C11orf17  | chromosome 11     | 4.33  | 2.11  | 0.00 | 0.00 |
| 218299_at   | C11orf24  | chromosome 11     | 6.52  | 2.71  | 0.00 | 0.00 |
| 52164_at    | C11orf24  | chromosome 11     | 3.51  | 1.81  | 0.00 | 0.00 |
| 204218_at   | C11orf51  | chromosome 11     | 3.84  | 1.94  | 0.00 | 0.00 |
| 221208_s_at | C11orf61  | chromosome 11     | 0.21  | -2.23 | 0.00 | 0.00 |
| 220141_at   | C11orf63  | chromosome 11     | 0.31  | -1.71 | 0.00 | 0.00 |
| 221599_at   | C11orf67  | chromosome 11     | 0.26  | -1.96 | 0.00 | 0.00 |
| 218789_s_at | C11orf71  | chromosome 11     | 0.22  | -2.16 | 0.00 | 0.00 |
| 64432_at    | C12orf47  | chromosome 12     | 0.14  | -2.83 | 0.00 | 0.00 |
| 218867_s_at | C12orf49  | chromosome 12     | 3.74  | 1.90  | 0.00 | 0.00 |
| 219099_at   | C12orf5   | chromosome 12     | 4.02  | 2.01  | 0.00 | 0.00 |
| 221777_at   | C12orf52  | chromosome 12     | 3.82  | 1.93  | 0.00 | 0.00 |
| 219166_at   | C14orf104 | chromosome 14     | 0.30  | -1.75 | 0.00 | 0.00 |
| 206500_s_at | C14orf106 | chromosome 14     | 0.15  | -2.71 | 0.00 | 0.00 |
| 218820_at   | C14orf132 | chromosome 14     | 0.07  | -3.76 | 0.00 | 0.00 |
| 208109_s_at | C15orf5   | chromosome 15     | 0.24  | -2.09 | 0.00 | 0.00 |
| 218060_s_at | C16orf57  | chromosome 16     | 3.18  | 1.67  | 0.00 | 0.00 |
| 219556_at   | C16orf59  | chromosome 16     | 4.60  | 2.20  | 0.00 | 0.00 |
| 203830_at   | C17orf75  | chromosome 17     | 0.20  | -2.31 | 0.00 | 0.00 |
| 221621_at   | C17orf86  | chromosome 17     | 0.29  | -1.81 | 0.00 | 0.00 |
| 207996_s_at | C18orf1   | chromosome 18     | 5.81  | 2.54  | 0.00 | 0.00 |



|             |           |                |       |       |      |      |
|-------------|-----------|----------------|-------|-------|------|------|
| 217539_at   | C18orf25  | chromosome 18  | 0.33  | -1.59 | 0.00 | 0.00 |
| 222266_at   | C19orf2   | chromosome 19  | 0.22  | -2.20 | 0.00 | 0.00 |
| 212925_at   | C19orf21  | chromosome 19  | 11.10 | 3.47  | 0.00 | 0.00 |
| 55705_at    | C19orf22  | chromosome 19  | 4.54  | 2.18  | 0.00 | 0.00 |
| 200076_s_at | C19orf50  | chromosome 19  | 3.95  | 1.98  | 0.00 | 0.00 |
| 206901_at   | C19orf57  | chromosome 19  | 4.78  | 2.26  | 0.00 | 0.00 |
| 218429_s_at | C19orf66  | chromosome 19  | 3.20  | 1.68  | 0.00 | 0.00 |
| 218712_at   | C1orf109  | chromosome 1 c | 0.23  | -2.11 | 0.00 | 0.00 |
| 220011_at   | C1orf135  | chromosome 1 c | 3.24  | 1.70  | 0.00 | 0.00 |
| 212003_at   | C1orf144  | chromosome 1 c | 5.76  | 2.53  | 0.00 | 0.00 |
| 212004_at   | C1orf144  | chromosome 1 c | 3.79  | 1.92  | 0.00 | 0.00 |
| 210711_at   | C1orf217  | chromosome 1 c | 0.21  | -2.25 | 0.00 | 0.00 |
| 216935_at   | C1orf46   | chromosome 1 c | 0.20  | -2.30 | 0.00 | 0.00 |
| 209006_s_at | C1orf63   | chromosome 1 c | 0.23  | -2.10 | 0.00 | 0.00 |
| 217087_at   | C1orf68   | chromosome 1 c | 0.26  | -1.95 | 0.00 | 0.00 |
| 202953_at   | C1QB      | complement con | 4.11  | 2.04  | 0.00 | 0.00 |
| 212067_s_at | C1R       | complement con | 5.69  | 2.51  | 0.00 | 0.00 |
| 218983_at   | C1RL      | complement con | 0.24  | -2.09 | 0.00 | 0.00 |
| 208747_s_at | C1S       | complement con | 11.24 | 3.49  | 0.00 | 0.00 |
| 203052_at   | C2        | complement con | 3.18  | 1.67  | 0.00 | 0.00 |
| 219463_at   | C20orf103 | chromosome 20  | 3.60  | 1.85  | 0.00 | 0.00 |
| 215852_x_at | C20orf117 | chromosome 20  | 0.33  | -1.61 | 0.00 | 0.00 |
| 219961_s_at | C20orf19  | chromosome 20  | 5.10  | 2.35  | 0.00 | 0.00 |
| 217835_x_at | C20orf24  | chromosome 20  | 3.13  | 1.65  | 0.00 | 0.00 |
| 219706_at   | C20orf29  | chromosome 20  | 3.37  | 1.75  | 0.00 | 0.00 |
| 219617_at   | C2orf34   | chromosome 2 c | 0.28  | -1.85 | 0.00 | 0.00 |
| 220149_at   | C2orf54   | chromosome 2 c | 0.16  | -2.66 | 0.00 | 0.00 |
| 220943_s_at | C2orf56   | chromosome 2 c | 0.24  | -2.07 | 0.00 | 0.00 |
| 215046_at   | C2orf67   | chromosome 2 c | 0.17  | -2.59 | 0.00 | 0.00 |
| 221878_at   | C2orf68   | chromosome 2 c | 0.20  | -2.31 | 0.00 | 0.00 |
| 65472_at    | C2orf68   | chromosome 2 c | 0.15  | -2.76 | 0.00 | 0.00 |
| 209906_at   | C3AR1     | complement con | 5.11  | 2.35  | 0.00 | 0.00 |
| 209285_s_at | C3orf63   | chromosome 3 c | 0.33  | -1.62 | 0.00 | 0.00 |
| 219023_at   | C4orf16   | chromosome 4 c | 0.17  | -2.59 | 0.00 | 0.00 |
| 218179_s_at | C4orf41   | chromosome 4 c | 0.28  | -1.83 | 0.00 | 0.00 |
| 218513_at   | C4orf43   | chromosome 4 c | 0.14  | -2.83 | 0.00 | 0.00 |
| 205500_at   | C5        | complement con | 0.17  | -2.53 | 0.00 | 0.00 |
| 201310_s_at | C5orf13   | chromosome 5 c | 4.10  | 2.04  | 0.00 | 0.00 |
| 221823_at   | C5orf30   | chromosome 5 c | 0.33  | -1.60 | 0.00 | 0.00 |
| 48030_i_at  | C5orf4    | chromosome 5 c | 13.20 | 3.72  | 0.00 | 0.00 |
| 218674_at   | C5orf44   | chromosome 5 c | 0.24  | -2.08 | 0.00 | 0.00 |
| 217924_at   | C6orf106  | chromosome 6 c | 3.32  | 1.73  | 0.00 | 0.00 |
| 210409_at   | C6orf124  | chromosome 6 c | 0.26  | -1.96 | 0.00 | 0.00 |
| 221100_at   | C6orf15   | chromosome 6 c | 3.57  | 1.84  | 0.00 | 0.00 |
| 220755_s_at | C6orf48   | chromosome 6 c | 3.55  | 1.83  | 0.00 | 0.00 |
| 219655_at   | C7orf10   | chromosome 7 c | 4.29  | 2.10  | 0.00 | 0.00 |
| 215024_at   | C7orf28B  | chromosome 7 c | 0.18  | -2.51 | 0.00 | 0.00 |
| 206497_at   | C7orf44   | chromosome 7 c | 0.31  | -1.71 | 0.00 | 0.00 |

|             |          |                     |       |       |      |      |
|-------------|----------|---------------------|-------|-------|------|------|
| 220949_s_at | C7orf49  | chromosome 7 c      | 3.79  | 1.92  | 0.00 | 0.00 |
| 210109_at   | C7orf54  | chromosome 7 c      | 0.30  | -1.74 | 0.00 | 0.00 |
| 221596_s_at | C7orf64  | chromosome 7 c      | 0.15  | -2.72 | 0.00 | 0.00 |
| 221629_x_at | C8orf30A | chromosome 8 c      | 3.94  | 1.98  | 0.00 | 0.00 |
| 61874_at    | C9orf7   | chromosome 9 c      | 3.02  | 1.60  | 0.00 | 0.00 |
| 204865_at   | CA3      | carbonic anhydr     | 0.21  | -2.29 | 0.00 | 0.00 |
| 207504_at   | CA7      | carbonic anhydr     | 3.45  | 1.79  | 0.00 | 0.00 |
| 211592_s_at | CACNA1C  | calcium channel     | 0.25  | -2.01 | 0.00 | 0.00 |
| 211802_x_at | CACNA1G  | calcium channel     | 4.04  | 2.02  | 0.00 | 0.00 |
| 62987_r_at  | CACNG4   | calcium channel     | 27.05 | 4.76  | 0.00 | 0.00 |
| 209030_s_at | CADM1    | cell adhesion mc    | 0.30  | -1.72 | 0.00 | 0.00 |
| 209031_at   | CADM1    | cell adhesion mc    | 0.10  | -3.32 | 0.00 | 0.00 |
| 205428_s_at | CALB2    | calbindin 2         | 4.94  | 2.30  | 0.00 | 0.00 |
| 221565_s_at | CALHM2   | calcium homeos      | 3.42  | 1.78  | 0.00 | 0.00 |
| 200622_x_at | CALM3    | calmodulin 3 (ph    | 5.20  | 2.38  | 0.00 | 0.00 |
| 64408_s_at  | CALML4   | calmodulin-like 4   | 0.32  | -1.64 | 0.00 | 0.00 |
| 200757_s_at | CALU     | calumenin           | 7.09  | 2.83  | 0.00 | 0.00 |
| 200755_s_at | CALU     | calumenin           | 3.85  | 1.95  | 0.00 | 0.00 |
| 34846_at    | CAMK2B   | calcium/calmodu     | 4.49  | 2.17  | 0.00 | 0.00 |
| 218309_at   | CAMK2N1  | calcium/calmodu     | 6.00  | 2.59  | 0.00 | 0.00 |
| 213547_at   | CAND2    | cullin-associated   | 0.23  | -2.16 | 0.00 | 0.00 |
| 221732_at   | CANT1    | calcium activate    | 3.08  | 1.62  | 0.00 | 0.00 |
| 200625_s_at | CAP1     | CAP, adenylate      | 3.36  | 1.75  | 0.00 | 0.00 |
| 208683_at   | CAPN2    | calpain 2, (m/II) I | 8.91  | 3.16  | 0.00 | 0.00 |
| 203356_at   | CAPN7    | calpain 7           | 0.30  | -1.76 | 0.00 | 0.00 |
| 203357_s_at | CAPN7    | calpain 7           | 0.29  | -1.81 | 0.00 | 0.00 |
| 200001_at   | CAPNS1   | calpain, small su   | 7.20  | 2.85  | 0.00 | 0.00 |
| 204950_at   | CARD8    | caspase recruitr    | 0.32  | -1.66 | 0.00 | 0.00 |
| 218384_at   | CARHSP1  | calcium regulate    | 4.39  | 2.14  | 0.00 | 0.00 |
| 61297_at    | CASKIN2  | CASK interactin     | 0.28  | -1.83 | 0.00 | 0.00 |
| 211366_x_at | CASP1    | caspase 1, apop     | 3.86  | 1.95  | 0.00 | 0.00 |
| 211368_s_at | CASP1    | caspase 1, apop     | 3.22  | 1.69  | 0.00 | 0.00 |
| 222201_s_at | CASP8AP2 | caspase 8 assoc     | 0.28  | -1.82 | 0.00 | 0.00 |
| 215573_at   | CAT      | catalase            | 0.30  | -1.74 | 0.00 | 0.00 |
| 208204_s_at | CAV3     | caveolin 3          | 3.57  | 1.84  | 0.00 | 0.00 |
| 213626_at   | CBR4     | carbonyl reducta    | 0.12  | -3.03 | 0.00 | 0.00 |
| 219611_s_at | CCDC21   | coiled-coil doma    | 3.59  | 1.85  | 0.00 | 0.00 |
| 219644_at   | CCDC41   | coiled-coil doma    | 0.15  | -2.74 | 0.00 | 0.00 |
| 218175_at   | CCDC92   | coiled-coil doma    | 6.13  | 2.62  | 0.00 | 0.00 |
| 209689_at   | CCDC93   | coiled-coil doma    | 0.27  | -1.90 | 0.00 | 0.00 |
| 32128_at    | CCL18    | chemokine (C-C      | 3.09  | 1.63  | 0.02 | 0.03 |
| 205476_at   | CCL20    | chemokine (C-C      | 4.96  | 2.31  | 0.00 | 0.00 |
| 207861_at   | CCL22    | chemokine (C-C      | 3.62  | 1.86  | 0.00 | 0.00 |
| 207955_at   | CCL27    | chemokine (C-C      | 0.01  | -6.30 | 0.00 | 0.00 |
| 204103_at   | CCL4     | chemokine (C-C      | 4.13  | 2.05  | 0.00 | 0.00 |
| 1405_i_at   | CCL5     | chemokine (C-C      | 5.61  | 2.49  | 0.00 | 0.00 |
| 204655_at   | CCL5     | chemokine (C-C      | 3.45  | 1.78  | 0.01 | 0.02 |
| 208712_at   | CCND1    | cyclin D1           | 0.24  | -2.04 | 0.00 | 0.00 |

|             |          |                    |       |       |      |      |
|-------------|----------|--------------------|-------|-------|------|------|
| 208711_s_at | CCND1    | cyclin D1          | 0.23  | -2.15 | 0.00 | 0.00 |
| 200951_s_at | CCND2    | cyclin D2          | 4.73  | 2.24  | 0.00 | 0.00 |
| 205034_at   | CCNE2    | cyclin E2          | 0.29  | -1.80 | 0.00 | 0.00 |
| 204645_at   | CCNT2    | cyclin T2          | 0.19  | -2.37 | 0.00 | 0.00 |
| 222156_x_at | CCPG1    | cell cycle progre  | 0.27  | -1.90 | 0.00 | 0.00 |
| 221156_x_at | CCPG1    | cell cycle progre  | 0.20  | -2.33 | 0.00 | 0.00 |
| 206983_at   | CCR6     | chemokine (C-C     | 0.32  | -1.66 | 0.00 | 0.00 |
| 220351_at   | CCRL1    | chemokine (C-C     | 0.30  | -1.72 | 0.02 | 0.03 |
| 201743_at   | CD14     | CD14 molecule      | 5.64  | 2.50  | 0.00 | 0.00 |
| 204306_s_at | CD151    | CD151 molecule     | 4.22  | 2.08  | 0.00 | 0.00 |
| 208653_s_at | CD164    | CD164 molecule     | 5.43  | 2.44  | 0.00 | 0.00 |
| 219669_at   | CD177    | CD177 molecule     | 3.53  | 1.82  | 0.00 | 0.00 |
| 206749_at   | CD1B     | CD1b molecule      | 3.49  | 1.81  | 0.01 | 0.01 |
| 205831_at   | CD2      | CD2 molecule       | 3.11  | 1.64  | 0.00 | 0.00 |
| 220428_at   | CD207    | CD207 molecule     | 0.29  | -1.81 | 0.00 | 0.00 |
| 209772_s_at | CD24     | CD24 molecule      | 17.78 | 4.15  | 0.00 | 0.00 |
| 209771_x_at | CD24     | CD24 molecule      | 4.46  | 2.16  | 0.01 | 0.02 |
| 208651_x_at | CD24     | CD24 molecule      | 4.02  | 2.01  | 0.01 | 0.01 |
| 216379_x_at | CD24     | CD24 molecule      | 3.98  | 1.99  | 0.02 | 0.03 |
| 219025_at   | CD248    | CD248 molecule     | 3.06  | 1.61  | 0.00 | 0.00 |
| 203799_at   | CD302    | CD302 molecule     | 0.16  | -2.65 | 0.00 | 0.00 |
| 35150_at    | CD40     | CD40 molecule,     | 8.42  | 3.07  | 0.00 | 0.00 |
| 222292_at   | CD40     | CD40 molecule,     | 0.24  | -2.09 | 0.00 | 0.00 |
| 217523_at   | CD44     | CD44 molecule (    | 0.26  | -1.96 | 0.00 | 0.00 |
| 211075_s_at | CD47     | CD47 molecule      | 8.48  | 3.08  | 0.00 | 0.00 |
| 213055_at   | CD47     | CD47 molecule      | 4.38  | 2.13  | 0.00 | 0.00 |
| 203416_at   | CD53     | CD53 molecule      | 3.25  | 1.70  | 0.00 | 0.00 |
| 222061_at   | CD58     | CD58 molecule      | 0.13  | -2.98 | 0.00 | 0.00 |
| 200983_x_at | CD59     | CD59 molecule,     | 7.55  | 2.92  | 0.00 | 0.00 |
| 200984_s_at | CD59     | CD59 molecule,     | 3.09  | 1.63  | 0.00 | 0.00 |
| 204440_at   | CD83     | CD83 molecule      | 3.35  | 1.74  | 0.00 | 0.00 |
| 205988_at   | CD84     | CD84 molecule      | 3.40  | 1.77  | 0.00 | 0.00 |
| 205627_at   | CDA      | cytidine deamina   | 11.29 | 3.50  | 0.00 | 0.00 |
| 205288_at   | CDC14A   | CDC14 cell divis   | 0.20  | -2.35 | 0.00 | 0.00 |
| 210742_at   | CDC14A   | CDC14 cell divis   | 0.17  | -2.58 | 0.00 | 0.00 |
| 211347_at   | CDC14B   | CDC14 cell divis   | 0.30  | -1.76 | 0.00 | 0.00 |
| 203213_at   | CDC2     | cell division cycl | 0.32  | -1.63 | 0.00 | 0.00 |
| 201853_s_at | CDC25B   | cell division cycl | 7.72  | 2.95  | 0.00 | 0.00 |
| 217879_at   | CDC27    | cell division cycl | 3.02  | 1.59  | 0.00 | 0.00 |
| 209288_s_at | CDC42EP3 | CDC42 effector     | 3.46  | 1.79  | 0.00 | 0.00 |
| 209057_x_at | CDC5L    | CDC5 cell divisic  | 4.21  | 2.08  | 0.00 | 0.00 |
| 221520_s_at | CDCA8    | cell division cycl | 3.65  | 1.87  | 0.00 | 0.00 |
| 206898_at   | CDH19    | cadherin 19, typ   | 0.33  | -1.60 | 0.00 | 0.00 |
| 203256_at   | CDH3     | cadherin 3, type   | 19.30 | 4.27  | 0.00 | 0.00 |
| 204252_at   | CDK2     | cyclin-dependen    | 0.28  | -1.86 | 0.00 | 0.00 |
| 203252_at   | CDK2AP2  | cyclin-dependen    | 3.01  | 1.59  | 0.00 | 0.00 |
| 204247_s_at | CDK5     | cyclin-dependen    | 7.10  | 2.83  | 0.00 | 0.00 |
| 202284_s_at | CDKN1A   | cyclin-dependen    | 3.19  | 1.67  | 0.00 | 0.00 |

|             |          |                    |       |       |      |      |
|-------------|----------|--------------------|-------|-------|------|------|
| 209112_at   | CDKN1B   | cyclin-dependen    | 0.24  | -2.08 | 0.00 | 0.00 |
| 213348_at   | CDKN1C   | cyclin-dependen    | 3.45  | 1.79  | 0.00 | 0.00 |
| 207039_at   | CDKN2A   | cyclin-dependen    | 15.64 | 3.97  | 0.00 | 0.00 |
| 209644_x_at | CDKN2A   | cyclin-dependen    | 3.98  | 1.99  | 0.00 | 0.00 |
| 218929_at   | CDKN2AIP | CDKN2A interac     | 0.30  | -1.75 | 0.00 | 0.00 |
| 204159_at   | CDKN2C   | cyclin-dependen    | 0.31  | -1.70 | 0.00 | 0.00 |
| 213230_at   | CDR2L    | cerebellar degen   | 4.57  | 2.19  | 0.00 | 0.00 |
| 206430_at   | CDX1     | caudal type hom    | 5.67  | 2.50  | 0.00 | 0.00 |
| 201884_at   | CEACAM5  | carcinoembryoni    | 7.67  | 2.94  | 0.00 | 0.00 |
| 203757_s_at | CEACAM6  | carcinoembryoni    | 24.09 | 4.59  | 0.00 | 0.00 |
| 211657_at   | CEACAM6  | carcinoembryoni    | 23.43 | 4.55  | 0.00 | 0.00 |
| 219505_at   | CECR1    | cat eye syndrom    | 3.33  | 1.73  | 0.00 | 0.00 |
| 219591_at   | CEND1    | cell cycle exit an | 4.69  | 2.23  | 0.00 | 0.00 |
| 204739_at   | CENPC1   | centromere prote   | 0.17  | -2.54 | 0.00 | 0.00 |
| 219294_at   | CENPQ    | centromere prote   | 0.21  | -2.22 | 0.00 | 0.00 |
| 215170_s_at | CEP152   | centrosomal proi   | 0.24  | -2.04 | 0.00 | 0.00 |
| 218827_s_at | CEP192   | centrosomal proi   | 0.32  | -1.67 | 0.00 | 0.00 |
| 221683_s_at | CEP290   | centrosomal proi   | 0.12  | -3.02 | 0.00 | 0.00 |
| 203493_s_at | CEP57    | centrosomal proi   | 0.30  | -1.76 | 0.00 | 0.00 |
| 203494_s_at | CEP57    | centrosomal proi   | 0.26  | -1.96 | 0.00 | 0.00 |
| 222151_s_at | CEP63    | centrosomal proi   | 0.20  | -2.33 | 0.00 | 0.00 |
| 212677_s_at | CEP68    | centrosomal proi   | 0.26  | -1.93 | 0.00 | 0.00 |
| 52285_f_at  | CEP76    | centrosomal proi   | 0.14  | -2.80 | 0.00 | 0.00 |
| 220335_x_at | CES3     | carboxylesterase   | 6.47  | 2.69  | 0.00 | 0.00 |
| 209194_at   | CETN2    | centrin, EF-hand   | 3.24  | 1.70  | 0.00 | 0.00 |
| 210701_at   | CFDP1    | craniofacial deve  | 0.14  | -2.82 | 0.00 | 0.00 |
| 213800_at   | CFH      | complement fact    | 7.12  | 2.83  | 0.00 | 0.00 |
| 206380_s_at | CFP      | complement fact    | 0.25  | -2.02 | 0.00 | 0.00 |
| 215318_at   | CG012    | hypothetical gen   | 0.20  | -2.29 | 0.00 | 0.00 |
| 203975_s_at | CHAF1A   | chromatin assen    | 0.29  | -1.80 | 0.00 | 0.00 |
| 201183_s_at | CHD4     | chromodomain h     | 0.27  | -1.91 | 0.00 | 0.00 |
| 220586_at   | CHD9     | chromodomain h     | 0.31  | -1.70 | 0.00 | 0.00 |
| 210416_s_at | CHEK2    | CHK2 checkpoin     | 3.03  | 1.60  | 0.00 | 0.00 |
| 202229_s_at | CHERP    | calcium homeos     | 3.40  | 1.77  | 0.00 | 0.00 |
| 209395_at   | CHI3L1   | chitinase 3-like 1 | 0.12  | -3.03 | 0.00 | 0.00 |
| 213060_s_at | CHI3L2   | chitinase 3-like 2 | 18.42 | 4.20  | 0.00 | 0.00 |
| 204591_at   | CHL1     | cell adhesion mc   | 0.31  | -1.68 | 0.01 | 0.01 |
| 218178_s_at | CHMP1B   | chromatin modifi   | 4.84  | 2.27  | 0.00 | 0.00 |
| 212624_s_at | CHN1     | chimerin (chima    | 4.18  | 2.06  | 0.00 | 0.00 |
| 206149_at   | CHP2     | calcineurin B hor  | 0.05  | -4.29 | 0.00 | 0.00 |
| 202175_at   | CHPF     | chondroitin polyr  | 3.84  | 1.94  | 0.00 | 0.00 |
| 221675_s_at | CHPT1    | choline phospho    | 0.20  | -2.30 | 0.00 | 0.00 |
| 211248_s_at | CHRD     | chordin            | 0.16  | -2.69 | 0.00 | 0.00 |
| 219634_at   | CHST11   | carbohydrate (cf   | 5.11  | 2.35  | 0.00 | 0.00 |
| 209834_at   | CHST3    | carbohydrate (cf   | 10.38 | 3.38  | 0.00 | 0.00 |
| 32094_at    | CHST3    | carbohydrate (cf   | 3.47  | 1.80  | 0.00 | 0.00 |
| 221065_s_at | CHST8    | carbohydrate (N-   | 3.12  | 1.64  | 0.00 | 0.00 |
| 201953_at   | CIB1     | calcium and inte   | 4.52  | 2.18  | 0.00 | 0.00 |

|             |         |                     |      |       |      |      |
|-------------|---------|---------------------|------|-------|------|------|
| 205007_s_at | CIB2    | calcium and inte    | 5.79 | 2.53  | 0.00 | 0.00 |
| 205008_s_at | CIB2    | calcium and inte    | 3.93 | 1.98  | 0.00 | 0.00 |
| 209571_at   | CIR1    | corepressor inter   | 0.19 | -2.37 | 0.00 | 0.00 |
| 221223_x_at | CISH    | cytokine inducibl   | 3.97 | 1.99  | 0.00 | 0.00 |
| 209357_at   | CITED2  | Cbp/p300-intera     | 0.30 | -1.73 | 0.00 | 0.00 |
| 207980_s_at | CITED2  | Cbp/p300-intera     | 0.29 | -1.80 | 0.00 | 0.00 |
| 211358_s_at | CIZ1    | CDKN1A interac      | 0.32 | -1.63 | 0.00 | 0.00 |
| 200998_s_at | CKAP4   | cytoskeleton-ass    | 3.83 | 1.94  | 0.00 | 0.00 |
| 201897_s_at | CKS1B   | CDC28 protein k     | 3.05 | 1.61  | 0.00 | 0.00 |
| 204170_s_at | CKS2    | CDC28 protein k     | 3.01 | 1.59  | 0.02 | 0.02 |
| 212308_at   | CLASP2  | cytoplasmic linke   | 0.13 | -2.90 | 0.00 | 0.00 |
| 206164_at   | CLCA2   | chloride channel    | 6.41 | 2.68  | 0.00 | 0.00 |
| 206166_s_at | CLCA2   | chloride channel    | 4.28 | 2.10  | 0.00 | 0.00 |
| 206165_s_at | CLCA2   | chloride channel    | 4.23 | 2.08  | 0.01 | 0.01 |
| 220026_at   | CLCA4   | chloride channel    | 0.06 | -3.97 | 0.00 | 0.00 |
| 201733_at   | CLCN3   | chloride channel    | 0.31 | -1.71 | 0.00 | 0.00 |
| 204482_at   | CLDN5   | claudin 5           | 0.26 | -1.97 | 0.00 | 0.00 |
| 202790_at   | CLDN7   | claudin 7           | 4.50 | 2.17  | 0.00 | 0.00 |
| 214598_at   | CLDN8   | claudin 8           | 0.04 | -4.63 | 0.00 | 0.00 |
| 209732_at   | CLEC2B  | C-type lectin dor   | 0.21 | -2.28 | 0.00 | 0.00 |
| 221698_s_at | CLEC7A  | C-type lectin dor   | 4.69 | 2.23  | 0.00 | 0.00 |
| 221881_s_at | CLIC4   | chloride intracell  | 4.87 | 2.29  | 0.00 | 0.00 |
| 201975_at   | CLIP1   | CAP-GLY domai       | 0.33 | -1.60 | 0.00 | 0.00 |
| 210716_s_at | CLIP1   | CAP-GLY domai       | 0.32 | -1.65 | 0.00 | 0.00 |
| 214683_s_at | CLK1    | CDC-like kinase     | 0.26 | -1.92 | 0.00 | 0.00 |
| 210346_s_at | CLK4    | CDC-like kinase     | 0.24 | -2.09 | 0.00 | 0.00 |
| 219341_at   | CLN8    | ceroid-lipofuscin   | 0.32 | -1.64 | 0.00 | 0.00 |
| 221845_s_at | CLPB    | ClpB caseinolytic   | 3.75 | 1.91  | 0.00 | 0.00 |
| 201640_x_at | CLPTM1  | cleft lip and pala  | 5.33 | 2.41  | 0.00 | 0.00 |
| 216293_at   | CLTA    | clathrin, light che | 3.01 | 1.59  | 0.00 | 0.00 |
| 205944_s_at | CLTCL1  | clathrin, heavy c   | 3.18 | 1.67  | 0.00 | 0.00 |
| 222043_at   | CLU     | clusterin           | 0.10 | -3.26 | 0.00 | 0.00 |
| 210571_s_at | CMAH    | cytidine monoph     | 0.31 | -1.68 | 0.00 | 0.00 |
| 205518_s_at | CMAH    | cytidine monoph     | 0.03 | -5.28 | 0.00 | 0.00 |
| 218111_s_at | CMAS    | cytidine monoph     | 0.23 | -2.11 | 0.00 | 0.00 |
| 206417_at   | CNGA1   | cyclic nucleotide   | 0.19 | -2.38 | 0.00 | 0.00 |
| 207342_at   | CNGB1   | cyclic nucleotide   | 8.29 | 3.05  | 0.00 | 0.00 |
| 209874_x_at | CNNM2   | cyclin M2           | 3.68 | 1.88  | 0.00 | 0.00 |
| 203239_s_at | CNOT3   | CCR4-NOT tran:      | 0.33 | -1.62 | 0.00 | 0.00 |
| 210867_at   | CNOT4   | CCR4-NOT tran:      | 0.14 | -2.86 | 0.00 | 0.00 |
| 202163_s_at | CNOT8   | CCR4-NOT tran:      | 0.29 | -1.80 | 0.00 | 0.00 |
| 208912_s_at | CNP     | 2',3'-cyclic nucle  | 3.11 | 1.64  | 0.00 | 0.00 |
| 220323_at   | CNTD2   | cyclin N-terminal   | 5.28 | 2.40  | 0.00 | 0.00 |
| 206970_at   | CNTN2   | contactin 2 (axor   | 3.02 | 1.59  | 0.00 | 0.00 |
| 213050_at   | COBL    | cordons-bleu hor    | 0.18 | -2.47 | 0.00 | 0.00 |
| 205229_s_at | COCH    | coagulation fact    | 0.15 | -2.74 | 0.00 | 0.00 |
| 211809_x_at | COL13A1 | collagen, type XI   | 0.30 | -1.75 | 0.00 | 0.00 |
| 204636_at   | COL17A1 | collagen, type X'   | 3.29 | 1.72  | 0.00 | 0.00 |

|             |            |                      |       |       |      |      |
|-------------|------------|----------------------|-------|-------|------|------|
| 202310_s_at | COL1A1     | collagen, type I,    | 4.88  | 2.29  | 0.00 | 0.00 |
| 202404_s_at | COL1A2     | collagen, type I,    | 19.51 | 4.29  | 0.00 | 0.00 |
| 202403_s_at | COL1A2     | collagen, type I,    | 12.32 | 3.62  | 0.00 | 0.00 |
| 208096_s_at | COL21A1    | collagen, type X,    | 0.05  | -4.48 | 0.00 | 0.00 |
| 215076_s_at | COL3A1     | collagen, type III   | 18.75 | 4.23  | 0.00 | 0.00 |
| 211161_s_at | COL3A1     | collagen, type III   | 10.43 | 3.38  | 0.00 | 0.00 |
| 201852_x_at | COL3A1     | collagen, type III   | 8.50  | 3.09  | 0.00 | 0.00 |
| 211980_at   | COL4A1     | collagen, type IV    | 14.34 | 3.84  | 0.00 | 0.00 |
| 211964_at   | COL4A2     | collagen, type IV    | 18.27 | 4.19  | 0.00 | 0.00 |
| 222073_at   | COL4A3     | collagen, type IV    | 0.29  | -1.77 | 0.00 | 0.00 |
| 212488_at   | COL5A1     | collagen, type V,    | 8.23  | 3.04  | 0.00 | 0.00 |
| 52255_s_at  | COL5A3     | collagen, type V,    | 0.21  | -2.23 | 0.00 | 0.00 |
| 213290_at   | COL6A2     | collagen, type VI    | 0.31  | -1.69 | 0.00 | 0.00 |
| 201438_at   | COL6A3     | collagen, type VI    | 27.71 | 4.79  | 0.00 | 0.00 |
| 204724_s_at | COL9A3     | collagen, type IX    | 0.33  | -1.60 | 0.00 | 0.00 |
| 221019_s_at | COLEC12    | collectin sub-farr   | 0.31  | -1.72 | 0.00 | 0.00 |
| 218439_s_at | COMMMD10   | COMM domain c        | 5.58  | 2.48  | 0.00 | 0.00 |
| 206441_s_at | COMMMD4    | COMM domain c        | 3.23  | 1.69  | 0.00 | 0.00 |
| 219561_at   | COPZ2      | coatomer proteir     | 4.67  | 2.22  | 0.00 | 0.00 |
| 64486_at    | CORO1B     | coronin, actin bir   | 3.99  | 2.00  | 0.00 | 0.00 |
| 203858_s_at | COX10      | COX10 homolog        | 3.48  | 1.80  | 0.00 | 0.00 |
| 221550_at   | COX15      | COX15 homolog        | 0.15  | -2.75 | 0.00 | 0.00 |
| 213758_at   | COX4I1     | cytochrome c ox      | 0.18  | -2.47 | 0.00 | 0.00 |
| 217249_x_at | COX7A2     | cytochrome c ox      | 4.29  | 2.10  | 0.00 | 0.00 |
| 205624_at   | CPA3       | carboxypeptidas      | 4.13  | 2.05  | 0.02 | 0.03 |
| 205773_at   | CPEB3      | cytoplasmic poly     | 0.30  | -1.75 | 0.00 | 0.00 |
| 211062_s_at | CPZ        | carboxypeptidas      | 3.51  | 1.81  | 0.00 | 0.00 |
| 202575_at   | CRABP2     | cellular retinoic ε  | 3.08  | 1.63  | 0.01 | 0.02 |
| 209833_at   | CRADD      | CASP2 and RIPI       | 4.64  | 2.22  | 0.00 | 0.00 |
| 209432_s_at | CREB3      | cAMP responsiv       | 3.15  | 1.66  | 0.00 | 0.00 |
| 212345_s_at | CREB3L2    | cAMP responsiv       | 3.22  | 1.69  | 0.00 | 0.00 |
| 202979_s_at | CREBZF     | CREB/ATF bZIP        | 0.18  | -2.49 | 0.00 | 0.00 |
| 214508_x_at | CREM       | cAMP responsiv       | 3.61  | 1.85  | 0.00 | 0.00 |
| 205081_at   | CRIP1      | cysteine-rich pro    | 0.04  | -4.66 | 0.00 | 0.00 |
| 221541_at   | CRISPLD2   | cysteine-rich sec    | 3.40  | 1.77  | 0.00 | 0.00 |
| 206274_s_at | CROCC      | ciliary rootlet coil | 0.33  | -1.62 | 0.00 | 0.00 |
| 211038_s_at | CROCCL1    | ciliary rootlet coil | 0.31  | -1.72 | 0.00 | 0.00 |
| 209674_at   | CRY1       | cryptochrome 1       | 0.15  | -2.73 | 0.00 | 0.00 |
| 212695_at   | CRY2       | cryptochrome 2       | 0.23  | -2.11 | 0.00 | 0.00 |
| 206778_at   | CRYBB2     | crystallin, beta B   | 3.35  | 1.74  | 0.00 | 0.00 |
| 205159_at   | CSF2RB     | colony stimulat      | 4.40  | 2.14  | 0.00 | 0.00 |
| 219049_at   | CSGALNACT1 | chondroitin sulfa    | 4.86  | 2.28  | 0.00 | 0.00 |
| 208866_at   | CSNK1A1    | casein kinase 1,     | 0.21  | -2.23 | 0.00 | 0.00 |
| 203575_at   | CSNK2A2    | casein kinase 2,     | 0.33  | -1.59 | 0.00 | 0.00 |
| 39966_at    | CSPG5      | chondroitin sulfa    | 0.25  | -1.99 | 0.00 | 0.00 |
| 207030_s_at | CSRP2      | cysteine and gly     | 5.04  | 2.34  | 0.00 | 0.00 |
| 210140_at   | CST7       | cystatin F (leuko    | 4.69  | 2.23  | 0.00 | 0.00 |
| 201201_at   | CSTB       | cystatin B (stefin   | 6.34  | 2.67  | 0.00 | 0.00 |

|             |          |                        |       |       |      |      |
|-------------|----------|------------------------|-------|-------|------|------|
| 204459_at   | CSTF2    | cleavage stimula       | 3.00  | 1.59  | 0.00 | 0.00 |
| 215930_s_at | CTAGE5   | CTAGE family, n        | 0.23  | -2.15 | 0.00 | 0.00 |
| 218923_at   | CTBS     | chitobiase, di-N-      | 0.25  | -1.99 | 0.00 | 0.00 |
| 208735_s_at | CTDSP2   | CTD (carboxy-te        | 3.03  | 1.60  | 0.00 | 0.00 |
| 201533_at   | CTNNB1   | catenin (cadheri       | 0.25  | -2.00 | 0.00 | 0.00 |
| 204925_at   | CTNS     | cystinosis, neph       | 3.42  | 1.78  | 0.00 | 0.00 |
| 213274_s_at | CTSB     | cathepsin B            | 5.48  | 2.46  | 0.00 | 0.00 |
| 200839_s_at | CTSB     | cathepsin B            | 4.48  | 2.17  | 0.00 | 0.00 |
| 200838_at   | CTSB     | cathepsin B            | 3.51  | 1.81  | 0.00 | 0.00 |
| 201487_at   | CTSC     | cathepsin C            | 5.90  | 2.56  | 0.00 | 0.00 |
| 202087_s_at | CTSL1    | cathepsin L1           | 4.72  | 2.24  | 0.00 | 0.00 |
| 202901_x_at | CTSS     | cathepsin S            | 0.19  | -2.39 | 0.00 | 0.00 |
| 212562_s_at | CTSZ     | cathepsin Z            | 4.05  | 2.02  | 0.00 | 0.00 |
| 214073_at   | CTTN     | cortactin              | 3.52  | 1.82  | 0.00 | 0.00 |
| 214782_at   | CTTN     | cortactin              | 0.17  | -2.58 | 0.00 | 0.00 |
| 202157_s_at | CUGBP2   | CUG triplet repe       | 0.30  | -1.75 | 0.00 | 0.00 |
| 202158_s_at | CUGBP2   | CUG triplet repe       | 0.25  | -2.03 | 0.00 | 0.00 |
| 203078_at   | CUL2     | cullin 2               | 0.19  | -2.40 | 0.00 | 0.00 |
| 203533_s_at | CUL5     | cullin 5               | 0.19  | -2.36 | 0.00 | 0.00 |
| 218787_x_at | CWF19L1  | CWF19-like 1, $\alpha$ | 3.96  | 1.99  | 0.00 | 0.00 |
| 204470_at   | CXCL1    | chemokine (C-X-        | 6.26  | 2.65  | 0.00 | 0.00 |
| 204533_at   | CXCL10   | chemokine (C-X-        | 9.44  | 3.24  | 0.02 | 0.02 |
| 203915_at   | CXCL9    | chemokine (C-X-        | 13.85 | 3.79  | 0.01 | 0.01 |
| 217028_at   | CXCR4    | chemokine (C-X-        | 6.16  | 2.62  | 0.00 | 0.00 |
| 220252_x_at | CXorf21  | chromosome X c         | 0.28  | -1.81 | 0.00 | 0.00 |
| 219355_at   | CXorf57  | chromosome X c         | 0.30  | -1.72 | 0.00 | 0.00 |
| 202263_at   | CYB5R1   | cytochrome b5 r        | 3.15  | 1.65  | 0.00 | 0.00 |
| 203028_s_at | CYBA     | cytochrome b-24        | 8.95  | 3.16  | 0.00 | 0.00 |
| 212133_at   | CYFIP1   | cytoplasmic FMF        | 3.17  | 1.67  | 0.00 | 0.00 |
| 213295_at   | CYLD     | cyliindromatosis i     | 0.33  | -1.60 | 0.00 | 0.00 |
| 221905_at   | CYLD     | cyliindromatosis i     | 0.31  | -1.72 | 0.00 | 0.00 |
| 39582_at    | CYLD     | cyliindromatosis i     | 0.29  | -1.80 | 0.00 | 0.00 |
| 214131_at   | CYorf15B | chromosome Y c         | 0.11  | -3.18 | 0.01 | 0.02 |
| 202435_s_at | CYP1B1   | cytochrome P45         | 0.21  | -2.23 | 0.00 | 0.00 |
| 202436_s_at | CYP1B1   | cytochrome P45         | 0.19  | -2.43 | 0.00 | 0.00 |
| 219825_at   | CYP26B1  | cytochrome P45         | 0.28  | -1.86 | 0.00 | 0.00 |
| 205676_at   | CYP27B1  | cytochrome P45         | 6.17  | 2.63  | 0.00 | 0.00 |
| 208327_at   | CYP2A13  | cytochrome P45         | 3.62  | 1.86  | 0.00 | 0.00 |
| 205073_at   | CYP2J2   | cytochrome P45         | 0.29  | -1.77 | 0.00 | 0.00 |
| 207786_at   | CYP2R1   | cytochrome P45         | 0.27  | -1.89 | 0.00 | 0.00 |
| 220432_s_at | CYP39A1  | cytochrome P45         | 0.10  | -3.32 | 0.00 | 0.00 |
| 205765_at   | CYP3A5   | cytochrome P45         | 0.06  | -4.14 | 0.00 | 0.00 |
| 210096_at   | CYP4B1   | cytochrome P45         | 0.05  | -4.38 | 0.00 | 0.00 |
| 206539_s_at | CYP4F12  | cytochrome P45         | 0.20  | -2.31 | 0.00 | 0.00 |
| 206515_at   | CYP4F3   | cytochrome P45         | 0.23  | -2.15 | 0.00 | 0.00 |
| 202879_s_at | CYTH1    | cytohesin 1            | 3.69  | 1.88  | 0.00 | 0.00 |
| 216060_s_at | DAAM1    | dishevelled asso       | 0.22  | -2.17 | 0.00 | 0.00 |
| 218808_at   | DALRD3   | DALR anticodon         | 0.33  | -1.60 | 0.00 | 0.00 |

|             |              |                   |        |       |      |      |
|-------------|--------------|-------------------|--------|-------|------|------|
| 202806_at   | DBN1         | drebrin 1         | 7.54   | 2.92  | 0.00 | 0.00 |
| 219001_s_at | DCAF10       | DDB1 and CUL4     | 0.30   | -1.76 | 0.00 | 0.00 |
| 221849_s_at | DCAF15       | DDB1 and CUL4     | 0.32   | -1.64 | 0.00 | 0.00 |
| 219717_at   | DCAF16       | DDB1 and CUL4     | 0.28   | -1.86 | 0.00 | 0.00 |
| 205338_s_at | DCT          | dopachrome tau    | 0.08   | -3.58 | 0.00 | 0.00 |
| 205337_at   | DCT          | dopachrome tau    | 0.03   | -5.24 | 0.00 | 0.00 |
| 209231_s_at | DCTN5        | dynactin 5 (p25)  | 4.91   | 2.29  | 0.00 | 0.00 |
| 209094_at   | DDAH1        | dimethylarginine  | 0.12   | -3.05 | 0.00 | 0.00 |
| 202887_s_at | DDIT4        | DNA-damage-in     | 6.71   | 2.75  | 0.00 | 0.00 |
| 213998_s_at | DDX17        | DEAD (Asp-Glu-    | 0.33   | -1.60 | 0.00 | 0.00 |
| 212515_s_at | DDX3X        | DEAD (Asp-Glu-    | 0.22   | -2.20 | 0.00 | 0.00 |
| 204909_at   | DDX6         | DEAD (Asp-Glu-    | 0.27   | -1.89 | 0.00 | 0.00 |
| 207356_at   | DEFB4        | defensin, beta 4  | 123.71 | 6.95  | 0.00 | 0.00 |
| 219763_at   | DENND1A      | DENN/MADD dc      | 10.89  | 3.45  | 0.00 | 0.00 |
| 205684_s_at | DENND4C      | DENN/MADD dc      | 0.21   | -2.22 | 0.00 | 0.00 |
| 218858_at   | DEPDC6       | DEP domain cor    | 0.21   | -2.23 | 0.00 | 0.00 |
| 203695_s_at | DFNA5        | deafness, autosc  | 14.06  | 3.81  | 0.00 | 0.00 |
| 221887_s_at | DFNB31       | deafness, autosc  | 3.31   | 1.73  | 0.00 | 0.00 |
| 217285_at   | DGCR14       | DiGeorge syndrc   | 3.63   | 1.86  | 0.00 | 0.00 |
| 201790_s_at | DHCR7        | 7-dehydrocholes   | 3.79   | 1.92  | 0.00 | 0.00 |
| 201791_s_at | DHCR7        | 7-dehydrocholes   | 3.49   | 1.80  | 0.00 | 0.00 |
| 219799_s_at | DHRS9        | dehydrogenase/i   | 3.65   | 1.87  | 0.00 | 0.00 |
| 201386_s_at | DHX15        | DEAH (Asp-Glu-    | 0.32   | -1.63 | 0.00 | 0.00 |
| 219350_s_at | DIABLO       | diablo homolog (  | 3.28   | 1.71  | 0.00 | 0.00 |
| 205603_s_at | DIAPH2       | diaphanous hom    | 0.21   | -2.27 | 0.00 | 0.00 |
| 213229_at   | DICER1       | dicer 1, ribonuck | 0.32   | -1.63 | 0.00 | 0.00 |
| 220572_at   | DKFZp547G183 | hypothetical LOC  | 0.14   | -2.83 | 0.00 | 0.00 |
| 206253_at   | DLG2         | discs, large hom  | 0.33   | -1.61 | 0.00 | 0.00 |
| 202571_s_at | DLGAP4       | discs, large (Dro | 4.40   | 2.14  | 0.00 | 0.00 |
| 207147_at   | DLX2         | distal-less home  | 4.93   | 2.30  | 0.00 | 0.00 |
| 203881_s_at | DMD          | dystrophin        | 0.25   | -2.02 | 0.00 | 0.00 |
| 203791_at   | DMXL1        | Dmx-like 1        | 0.19   | -2.40 | 0.00 | 0.00 |
| 214229_at   | DNAH17       | dynein, axonem:   | 7.64   | 2.93  | 0.00 | 0.00 |
| 215266_at   | DNAH3        | dynein, axonem:   | 3.54   | 1.82  | 0.00 | 0.00 |
| 220395_at   | DNAJA4       | DnaJ (Hsp40) hc   | 4.54   | 2.18  | 0.00 | 0.00 |
| 203810_at   | DNAJB4       | DnaJ (Hsp40) hc   | 0.23   | -2.09 | 0.00 | 0.00 |
| 212817_at   | DNAJB5       | DnaJ (Hsp40) hc   | 3.21   | 1.68  | 0.00 | 0.00 |
| 218435_at   | DNAJC15      | DnaJ (Hsp40) hc   | 3.21   | 1.68  | 0.00 | 0.00 |
| 212911_at   | DNAJC16      | DnaJ (Hsp40) hc   | 0.21   | -2.29 | 0.00 | 0.00 |
| 219861_at   | DNAJC17      | DnaJ (Hsp40) hc   | 0.28   | -1.85 | 0.00 | 0.00 |
| 204008_at   | DNAL4        | dynein, axonem:   | 4.00   | 2.00  | 0.00 | 0.00 |
| 205554_s_at | DNASE1L3     | deoxyribonuclea   | 0.24   | -2.09 | 0.00 | 0.00 |
| 203187_at   | DOCK1        | dedicator of cyto | 0.16   | -2.67 | 0.00 | 0.00 |
| 213482_at   | DOCK3        | dedicator of cyto | 0.24   | -2.05 | 0.00 | 0.00 |
| 221677_s_at | DONSON       | downstream neiç   | 0.25   | -1.99 | 0.00 | 0.00 |
| 40612_at    | DOPEY1       | dopey family me   | 0.20   | -2.35 | 0.00 | 0.00 |
| 213267_at   | DOPEY1       | dopey family me   | 0.11   | -3.15 | 0.00 | 0.00 |
| 214301_s_at | DPYSL4       | dihydropyrimidin  | 3.42   | 1.78  | 0.00 | 0.00 |



|             |         |                     |       |       |      |      |
|-------------|---------|---------------------|-------|-------|------|------|
| 206590_x_at | DRD2    | dopamine recept     | 3.33  | 1.74  | 0.00 | 0.00 |
| 207648_at   | DRP2    | dystrophin relate   | 4.79  | 2.26  | 0.00 | 0.00 |
| 204751_x_at | DSC2    | desmocollin 2       | 69.34 | 6.12  | 0.00 | 0.00 |
| 204750_s_at | DSC2    | desmocollin 2       | 17.80 | 4.15  | 0.00 | 0.00 |
| 205595_at   | DSG3    | desmoglein 3 (pr    | 26.79 | 4.74  | 0.00 | 0.00 |
| 221681_s_at | DSPP    | dentin sialophos    | 0.24  | -2.06 | 0.00 | 0.00 |
| 214663_at   | DSTYK   | dual serine/threc   | 0.31  | -1.71 | 0.00 | 0.00 |
| 218585_s_at | DTL     | denticleless hom    | 0.27  | -1.90 | 0.00 | 0.00 |
| 214253_s_at | DTNB    | dystrobrevin, bet   | 6.06  | 2.60  | 0.00 | 0.00 |
| 203270_at   | DTYMK   | deoxythymidylat     | 3.08  | 1.62  | 0.00 | 0.00 |
| 205762_s_at | DUS4L   | dihydrouridine sy   | 0.26  | -1.94 | 0.00 | 0.00 |
| 208892_s_at | DUSP6   | dual specificity p  | 4.36  | 2.12  | 0.00 | 0.00 |
| 220774_at   | DYM     | dymeclin            | 0.14  | -2.79 | 0.00 | 0.00 |
| 205348_s_at | DYNC111 | dynein, cytoplas    | 0.25  | -2.00 | 0.00 | 0.00 |
| 203762_s_at | DYNC2L1 | dynein, cytoplas    | 0.29  | -1.78 | 0.00 | 0.00 |
| 201999_s_at | DYNLT1  | dynein, light cha   | 3.11  | 1.64  | 0.00 | 0.00 |
| 202971_s_at | DYRK2   | dual-specificity ty | 0.26  | -1.94 | 0.00 | 0.00 |
| 218660_at   | DYSF    | dysferlin, limb gii | 4.73  | 2.24  | 0.00 | 0.00 |
| 204556_s_at | DZIP1   | DAZ interacting j   | 3.93  | 1.97  | 0.00 | 0.00 |
| 38707_r_at  | E2F4    | E2F transcription   | 16.08 | 4.01  | 0.00 | 0.00 |
| 202248_at   | E2F4    | E2F transcription   | 3.07  | 1.62  | 0.00 | 0.00 |
| 219990_at   | E2F8    | E2F transcription   | 0.32  | -1.64 | 0.01 | 0.01 |
| 206101_at   | ECM2    | extracellular mat   | 0.31  | -1.68 | 0.00 | 0.00 |
| 211129_x_at | EDA     | ectodysplasin A     | 0.30  | -1.76 | 0.00 | 0.00 |
| 206758_at   | EDN2    | endothelin 2        | 4.58  | 2.19  | 0.00 | 0.00 |
| 204464_s_at | EDNRA   | endothelin recep    | 3.18  | 1.67  | 0.01 | 0.02 |
| 204840_s_at | EEA1    | early endosome      | 0.14  | -2.81 | 0.00 | 0.00 |
| 210656_at   | EED     | embryonic ectod     | 0.21  | -2.24 | 0.00 | 0.00 |
| 219833_s_at | EFHC1   | EF-hand domain      | 0.26  | -1.95 | 0.00 | 0.00 |
| 220591_s_at | EFHC2   | EF-hand domain      | 0.12  | -3.11 | 0.00 | 0.00 |
| 206254_at   | EGF     | epidermal growtl    | 0.22  | -2.16 | 0.00 | 0.00 |
| 206115_at   | EGR3    | early growth resj   | 0.05  | -4.48 | 0.00 | 0.00 |
| 221755_at   | EHBP1L1 | EH domain bindi     | 3.87  | 1.95  | 0.00 | 0.00 |
| 91703_at    | EHBP1L1 | EH domain bindi     | 3.29  | 1.72  | 0.00 | 0.00 |
| 221870_at   | EHD2    | EH-domain cont:     | 3.05  | 1.61  | 0.00 | 0.00 |
| 218935_at   | EHD3    | EH-domain cont:     | 6.54  | 2.71  | 0.00 | 0.00 |
| 205222_at   | EHHADH  | enoyl-Coenzyme      | 0.31  | -1.67 | 0.00 | 0.00 |
| 211698_at   | EID1    | EP300 interactin    | 0.32  | -1.64 | 0.00 | 0.00 |
| 219190_s_at | EIF2C4  | eukaryotic transl   | 0.24  | -2.07 | 0.00 | 0.00 |
| 205321_at   | EIF2S3  | eukaryotic transl   | 0.20  | -2.34 | 0.00 | 0.00 |
| 215190_at   | EIF3M   | eukaryotic transl   | 0.24  | -2.05 | 0.00 | 0.00 |
| 208290_s_at | EIF5    | eukaryotic transl   | 3.31  | 1.73  | 0.01 | 0.01 |
| 208708_x_at | EIF5    | eukaryotic transl   | 3.08  | 1.63  | 0.00 | 0.00 |
| 201123_s_at | EIF5A   | eukaryotic transl   | 3.22  | 1.69  | 0.00 | 0.00 |
| 210361_s_at | ELF2    | E74-like factor 2   | 0.18  | -2.52 | 0.00 | 0.00 |
| 210827_s_at | ELF3    | E74-like factor 3   | 8.67  | 3.12  | 0.00 | 0.00 |
| 203490_at   | ELF4    | E74-like factor 4   | 6.66  | 2.74  | 0.00 | 0.00 |
| 204095_s_at | ELL     | elongation factor   | 4.36  | 2.13  | 0.00 | 0.00 |

|             |          |                    |       |       |      |      |
|-------------|----------|--------------------|-------|-------|------|------|
| 219518_s_at | ELL3     | elongation factor  | 0.31  | -1.69 | 0.01 | 0.02 |
| 219517_at   | ELL3     | elongation factor  | 0.25  | -2.03 | 0.00 | 0.00 |
| 219532_at   | ELOVL4   | elongation of ver  | 0.11  | -3.24 | 0.00 | 0.00 |
| 204256_at   | ELOVL6   | ELOVL family m     | 0.27  | -1.92 | 0.00 | 0.00 |
| 210868_s_at | ELOVL6   | ELOVL family m     | 0.15  | -2.78 | 0.00 | 0.00 |
| 204796_at   | EML1     | echinoderm micr    | 0.27  | -1.89 | 0.00 | 0.00 |
| 204797_s_at | EML1     | echinoderm micr    | 0.22  | -2.21 | 0.00 | 0.00 |
| 204397_at   | EML2     | echinoderm micr    | 3.29  | 1.72  | 0.00 | 0.00 |
| 213895_at   | EMP1     | epithelial membr   | 0.26  | -1.97 | 0.00 | 0.00 |
| 204975_at   | EMP2     | epithelial membr   | 0.31  | -1.71 | 0.00 | 0.00 |
| 221950_at   | EMX2     | empty spiracles    | 0.20  | -2.30 | 0.00 | 0.00 |
| 220559_at   | EN1      | engrailed homec    | 0.17  | -2.56 | 0.00 | 0.00 |
| 201341_at   | ENC1     | ectodermal-neur    | 5.13  | 2.36  | 0.00 | 0.00 |
| 201340_s_at | ENC1     | ectodermal-neur    | 3.46  | 1.79  | 0.00 | 0.00 |
| 202221_s_at | EP300    | E1A binding prot   | 0.28  | -1.85 | 0.00 | 0.00 |
| 201719_s_at | EPB41L2  | erythrocyte mem    | 0.28  | -1.84 | 0.00 | 0.00 |
| 201839_s_at | EPCAM    | epithelial cell ad | 0.24  | -2.07 | 0.00 | 0.00 |
| 209588_at   | EPHB2    | EPH receptor Bz    | 6.50  | 2.70  | 0.00 | 0.00 |
| 209589_s_at | EPHB2    | EPH receptor Bz    | 4.22  | 2.08  | 0.00 | 0.00 |
| 204718_at   | EPHB6    | EPH receptor Bf    | 0.13  | -2.93 | 0.00 | 0.00 |
| 209368_at   | EPHX2    | epoxide hydrolas   | 0.24  | -2.03 | 0.00 | 0.00 |
| 202909_at   | EPM2AIP1 | EPM2A (laforin)    | 0.30  | -1.72 | 0.00 | 0.00 |
| 203464_s_at | EPN2     | epsin 2            | 0.20  | -2.34 | 0.00 | 0.00 |
| 396_f_at    | EPOR     | erythropoietin re  | 9.95  | 3.32  | 0.00 | 0.00 |
| 217886_at   | EPS15    | epidermal growtl   | 0.22  | -2.19 | 0.00 | 0.00 |
| 221056_x_at | EPS15L1  | epidermal growtl   | 4.55  | 2.19  | 0.00 | 0.00 |
| 202609_at   | EPS8     | epidermal growtl   | 0.09  | -3.44 | 0.00 | 0.00 |
| 218778_x_at | EPS8L1   | EPS8-like 1        | 3.34  | 1.74  | 0.00 | 0.00 |
| 214012_at   | ERAP1    | endoplasmic reti   | 0.09  | -3.53 | 0.00 | 0.00 |
| 217941_s_at | ERBB2IP  | erbb2 interacting  | 0.27  | -1.88 | 0.00 | 0.00 |
| 205767_at   | EREG     | epiregulin         | 0.33  | -1.62 | 0.02 | 0.04 |
| 213541_s_at | ERG      | v-ets erythroblas  | 3.31  | 1.73  | 0.00 | 0.00 |
| 215095_at   | ESD      | esterase D/formy   | 0.26  | -1.94 | 0.00 | 0.00 |
| 205225_at   | ESR1     | estrogen receptc   | 3.44  | 1.78  | 0.00 | 0.00 |
| 211234_x_at | ESR1     | estrogen receptc   | 3.11  | 1.64  | 0.00 | 0.00 |
| 211627_x_at | ESR1     | estrogen receptc   | 0.22  | -2.17 | 0.00 | 0.00 |
| 204034_at   | ETHE1    | ethylmalonic enc   | 15.37 | 3.94  | 0.00 | 0.00 |
| 210887_s_at | EVC      | Ellis van Creveld  | 4.35  | 2.12  | 0.00 | 0.00 |
| 210012_s_at | EWSR1    | Ewing sarcoma l    | 0.21  | -2.27 | 0.00 | 0.00 |
| 91684_g_at  | EXOSC4   | exosome compo      | 3.25  | 1.70  | 0.00 | 0.00 |
| 214734_at   | EXPH5    | exophilin 5        | 0.14  | -2.83 | 0.00 | 0.00 |
| 213929_at   | EXPH5    | exophilin 5        | 0.06  | -4.07 | 0.00 | 0.00 |
| 214985_at   | EXT1     | exostoses (multi   | 0.28  | -1.85 | 0.00 | 0.00 |
| 203249_at   | EZH1     | enhancer of zest   | 0.31  | -1.69 | 0.00 | 0.00 |
| 211310_at   | EZH1     | enhancer of zest   | 0.17  | -2.58 | 0.00 | 0.00 |
| 203989_x_at | F2R      | coagulation fact   | 0.09  | -3.45 | 0.00 | 0.00 |
| 210445_at   | FABP6    | fatty acid binding | 6.52  | 2.70  | 0.00 | 0.00 |
| 205029_s_at | FABP7    | fatty acid binding | 0.11  | -3.22 | 0.00 | 0.00 |

|             |          |                    |       |       |      |      |
|-------------|----------|--------------------|-------|-------|------|------|
| 205030_at   | FABP7    | fatty acid binding | 0.02  | -6.08 | 0.00 | 0.00 |
| 202218_s_at | FADS2    | fatty acid desatu  | 3.42  | 1.77  | 0.00 | 0.00 |
| 221602_s_at | FAIM3    | Fas apoptotic int  | 4.86  | 2.28  | 0.00 | 0.00 |
| 204403_x_at | FAM115A  | family with sequ   | 0.31  | -1.67 | 0.00 | 0.00 |
| 212981_s_at | FAM115A  | family with sequ   | 0.25  | -2.01 | 0.00 | 0.00 |
| 221249_s_at | FAM117A  | family with sequ   | 0.15  | -2.77 | 0.00 | 0.00 |
| 222129_at   | FAM134A  | family with sequ   | 0.17  | -2.53 | 0.00 | 0.00 |
| 218532_s_at | FAM134B  | family with sequ   | 0.09  | -3.48 | 0.00 | 0.00 |
| 202972_s_at | FAM13A   | family with sequ   | 0.31  | -1.67 | 0.00 | 0.00 |
| 217047_s_at | FAM13A   | family with sequ   | 0.13  | -2.94 | 0.00 | 0.00 |
| 202973_x_at | FAM13A   | family with sequ   | 0.10  | -3.37 | 0.00 | 0.00 |
| 218337_at   | FAM160B2 | family with sequ   | 3.11  | 1.64  | 0.00 | 0.00 |
| 205308_at   | FAM164A  | family with sequ   | 0.14  | -2.81 | 0.00 | 0.00 |
| 36612_at    | FAM168A  | family with sequ   | 0.32  | -1.65 | 0.00 | 0.00 |
| 212936_at   | FAM172A  | family with sequ   | 0.25  | -2.03 | 0.00 | 0.00 |
| 51158_at    | FAM174B  | family with sequ   | 0.18  | -2.51 | 0.00 | 0.00 |
| 203482_at   | FAM178A  | family with sequ   | 0.28  | -1.85 | 0.00 | 0.00 |
| 213304_at   | FAM179B  | family with sequ   | 0.24  | -2.09 | 0.00 | 0.00 |
| 220150_s_at | FAM184A  | family with sequ   | 0.23  | -2.11 | 0.00 | 0.00 |
| 213900_at   | FAM189A2 | family with sequ   | 0.11  | -3.19 | 0.00 | 0.00 |
| 202915_s_at | FAM20B   | family with sequ   | 0.26  | -1.96 | 0.00 | 0.00 |
| 201889_at   | FAM3C    | family with sequ   | 0.28  | -1.83 | 0.00 | 0.00 |
| 216682_s_at | FAM48A   | family with sequ   | 0.15  | -2.72 | 0.00 | 0.00 |
| 208092_s_at | FAM49A   | family with sequ   | 3.94  | 1.98  | 0.00 | 0.00 |
| 45749_at    | FAM65A   | family with sequ   | 4.96  | 2.31  | 0.00 | 0.00 |
| 218029_at   | FAM65A   | family with sequ   | 4.38  | 2.13  | 0.00 | 0.00 |
| 219895_at   | FAM70A   | family with sequ   | 0.21  | -2.25 | 0.00 | 0.00 |
| 204511_at   | FARP2    | FERM, RhoGEF       | 0.32  | -1.67 | 0.00 | 0.00 |
| 204781_s_at | FAS      | Fas (TNF recept    | 0.30  | -1.74 | 0.00 | 0.00 |
| 215719_x_at | FAS      | Fas (TNF recept    | 0.28  | -1.84 | 0.00 | 0.00 |
| 210975_x_at | FASTK    | Fas-activated se   | 3.23  | 1.69  | 0.00 | 0.00 |
| 202766_s_at | FBN1     | fibrillin 1        | 5.89  | 2.56  | 0.00 | 0.00 |
| 203184_at   | FBN2     | fibrillin 2        | 8.47  | 3.08  | 0.00 | 0.00 |
| 220896_at   | FBXL18   | F-box and leucin   | 4.18  | 2.06  | 0.00 | 0.00 |
| 209630_s_at | FBXW2    | F-box and WD re    | 0.31  | -1.71 | 0.00 | 0.00 |
| 218751_s_at | FBXW7    | F-box and WD re    | 0.23  | -2.11 | 0.00 | 0.00 |
| 215567_at   | FCF1     | FCF1 small sub     | 0.20  | -2.36 | 0.00 | 0.00 |
| 211396_at   | FCGR2C   | Fc fragment of Iç  | 4.59  | 2.20  | 0.00 | 0.00 |
| 209210_s_at | FERMT2   | fermitin family hc | 3.37  | 1.75  | 0.01 | 0.02 |
| 203562_at   | FEZ1     | fasciculation and  | 12.19 | 3.61  | 0.00 | 0.00 |
| 222164_at   | FGFR1    | fibroblast growth  | 0.09  | -3.42 | 0.00 | 0.00 |
| 203638_s_at | FGFR2    | fibroblast growth  | 0.32  | -1.67 | 0.00 | 0.00 |
| 204834_at   | FGL2     | fibrinogen-like 2  | 3.73  | 1.90  | 0.00 | 0.00 |
| 210299_s_at | FHL1     | four and a half L  | 0.27  | -1.91 | 0.00 | 0.00 |
| 201540_at   | FHL1     | four and a half L  | 0.07  | -3.84 | 0.00 | 0.00 |
| 202949_s_at | FHL2     | four and a half L  | 4.24  | 2.08  | 0.00 | 0.00 |
| 214119_s_at | FKBP1A   | FK506 binding p    | 7.86  | 2.97  | 0.00 | 0.00 |
| 210186_s_at | FKBP1A   | FK506 binding p    | 5.41  | 2.43  | 0.00 | 0.00 |

|             |          |                       |      |       |      |      |
|-------------|----------|-----------------------|------|-------|------|------|
| 205283_at   | FKTN     | fukutin               | 0.24 | -2.08 | 0.00 | 0.00 |
| 215645_at   | FLCN     | folliculin            | 0.27 | -1.87 | 0.00 | 0.00 |
| 215704_at   | FLG      | flaggrin              | 0.04 | -4.67 | 0.00 | 0.00 |
| 212025_s_at | FLII     | flightless I homo     | 3.16 | 1.66  | 0.00 | 0.00 |
| 205511_at   | FLJ10038 | hypothetical prot     | 0.11 | -3.18 | 0.00 | 0.00 |
| 220828_s_at | FLJ11292 | hypothetical prot     | 0.21 | -2.22 | 0.00 | 0.00 |
| 219871_at   | FLJ13197 | hypothetical FLJ      | 0.20 | -2.29 | 0.00 | 0.00 |
| 64900_at    | FLJ22167 | hypothetical prot     | 0.20 | -2.33 | 0.00 | 0.00 |
| 208613_s_at | FLNB     | filamin B, beta       | 5.23 | 2.39  | 0.00 | 0.00 |
| 210142_x_at | FLOT1    | flotillin 1           | 5.06 | 2.34  | 0.00 | 0.00 |
| 208749_x_at | FLOT1    | flotillin 1           | 4.53 | 2.18  | 0.00 | 0.00 |
| 201350_at   | FLOT2    | flotillin 2           | 4.61 | 2.21  | 0.00 | 0.00 |
| 210316_at   | FLT4     | fms-related tyros     | 0.27 | -1.91 | 0.00 | 0.00 |
| 205666_at   | FMO1     | flavin containing     | 0.28 | -1.84 | 0.00 | 0.00 |
| 215300_s_at | FMO5     | flavin containing     | 0.09 | -3.45 | 0.00 | 0.00 |
| 203689_s_at | FMR1     | fragile X mental      | 0.24 | -2.04 | 0.00 | 0.00 |
| 216442_x_at | FN1      | fibronectin 1         | 7.31 | 2.87  | 0.00 | 0.00 |
| 212464_s_at | FN1      | fibronectin 1         | 7.06 | 2.82  | 0.00 | 0.00 |
| 210495_x_at | FN1      | fibronectin 1         | 6.90 | 2.79  | 0.00 | 0.00 |
| 211719_x_at | FN1      | fibronectin 1         | 5.54 | 2.47  | 0.01 | 0.01 |
| 204420_at   | FOSL1    | FOS-like antigen      | 7.34 | 2.88  | 0.00 | 0.00 |
| 213260_at   | FOXC1    | forkhead box C1       | 8.01 | 3.00  | 0.00 | 0.00 |
| 206912_at   | FOXE1    | forkhead box E1       | 5.20 | 2.38  | 0.00 | 0.00 |
| 205021_s_at | FOXN3    | forkhead box N3       | 4.92 | 2.30  | 0.00 | 0.00 |
| 205022_s_at | FOXN3    | forkhead box N3       | 0.31 | -1.70 | 0.00 | 0.00 |
| 218031_s_at | FOXN3    | forkhead box N3       | 0.24 | -2.06 | 0.00 | 0.00 |
| 205119_s_at | FPR1     | formyl peptide re     | 6.11 | 2.61  | 0.00 | 0.00 |
| 209864_at   | FRAT2    | frequently rearra     | 0.27 | -1.89 | 0.00 | 0.00 |
| 208476_s_at | FRMD4A   | FERM domain ci        | 0.17 | -2.54 | 0.00 | 0.00 |
| 214319_at   | FRY      | furry homolog (D      | 0.22 | -2.18 | 0.00 | 0.00 |
| 204072_s_at | FRY      | furry homolog (D      | 0.20 | -2.35 | 0.00 | 0.00 |
| 212546_s_at | FRYL     | FRY-like              | 0.28 | -1.86 | 0.00 | 0.00 |
| 201564_s_at | FSCN1    | fascin homolog 1      | 6.46 | 2.69  | 0.00 | 0.00 |
| 204948_s_at | FST      | follistatin           | 6.18 | 2.63  | 0.00 | 0.00 |
| 208782_at   | FSTL1    | follistatin-like 1    | 8.39 | 3.07  | 0.00 | 0.00 |
| 203592_s_at | FSTL3    | follistatin-like 3 (: | 5.03 | 2.33  | 0.00 | 0.00 |
| 220604_x_at | FTCD     | formiminotransfe      | 3.28 | 1.72  | 0.00 | 0.00 |
| 214211_at   | FTH1     | ferritin, heavy po    | 3.28 | 1.71  | 0.00 | 0.00 |
| 213187_x_at | FTL      | ferritin, light poly  | 5.78 | 2.53  | 0.00 | 0.00 |
| 212788_x_at | FTL      | ferritin, light poly  | 4.24 | 2.08  | 0.00 | 0.00 |
| 214093_s_at | FUBP1    | far upstream ele      | 0.16 | -2.62 | 0.00 | 0.00 |
| 212847_at   | FUBP1    | far upstream ele      | 0.16 | -2.65 | 0.00 | 0.00 |
| 204299_at   | FUSIP1   | FUS interacting p     | 0.29 | -1.80 | 0.00 | 0.00 |
| 210608_s_at | FUT2     | fucosyltransfera      | 8.93 | 3.16  | 0.00 | 0.00 |
| 214088_s_at | FUT3     | fucosyltransfera      | 5.55 | 2.47  | 0.00 | 0.00 |
| 210399_x_at | FUT6     | fucosyltransfera      | 6.30 | 2.66  | 0.00 | 0.00 |
| 211465_x_at | FUT6     | fucosyltransfera      | 5.48 | 2.45  | 0.00 | 0.00 |
| 203988_s_at | FUT8     | fucosyltransfera      | 0.23 | -2.15 | 0.00 | 0.00 |

|             |           |                    |       |       |      |      |
|-------------|-----------|--------------------|-------|-------|------|------|
| 201636_at   | FXR1      | fragile X mental   | 0.29  | -1.78 | 0.00 | 0.00 |
| 218084_x_at | FXYD5     | FXYD domain cc     | 12.10 | 3.60  | 0.00 | 0.00 |
| 221245_s_at | FZD5      | frizzled homolog   | 4.42  | 2.15  | 0.00 | 0.00 |
| 222187_x_at | G3BP1     | GTPase activatir   | 0.27  | -1.91 | 0.00 | 0.00 |
| 208869_s_at | GABARAPL1 | GABA(A) recepti    | 0.32  | -1.67 | 0.00 | 0.00 |
| 219815_at   | GAL3ST4   | galactose-3-O-si   | 0.22  | -2.18 | 0.00 | 0.00 |
| 204417_at   | GALC      | galactosylceram    | 0.29  | -1.80 | 0.00 | 0.00 |
| 202528_at   | GALE      | UDP-galactose-4    | 4.37  | 2.13  | 0.00 | 0.00 |
| 212256_at   | GALNT10   | UDP-N-acetyl-al    | 3.29  | 1.72  | 0.00 | 0.00 |
| 218885_s_at | GALNT12   | UDP-N-acetyl-al    | 0.30  | -1.73 | 0.00 | 0.00 |
| 219271_at   | GALNT14   | UDP-N-acetyl-al    | 19.00 | 4.25  | 0.00 | 0.00 |
| 217787_s_at | GALNT2    | UDP-N-acetyl-al    | 3.43  | 1.78  | 0.00 | 0.00 |
| 219956_at   | GALNT6    | UDP-N-acetyl-al    | 12.22 | 3.61  | 0.00 | 0.00 |
| 33579_i_at  | GALR3     | galanin receptor   | 5.51  | 2.46  | 0.00 | 0.00 |
| 220124_at   | GAN       | gigaxonin          | 0.13  | -2.99 | 0.00 | 0.00 |
| 214626_s_at | GANAB     | glucosidase, alpl  | 3.24  | 1.70  | 0.00 | 0.00 |
| 214855_s_at | GARNL1    | GTPase activatir   | 0.28  | -1.82 | 0.00 | 0.00 |
| 202192_s_at | GAS7      | growth arrest-sp   | 0.21  | -2.26 | 0.00 | 0.00 |
| 202191_s_at | GAS7      | growth arrest-sp   | 0.16  | -2.65 | 0.00 | 0.00 |
| 209603_at   | GATA3     | GATA binding pr    | 0.11  | -3.14 | 0.00 | 0.00 |
| 209604_s_at | GATA3     | GATA binding pr    | 0.11  | -3.19 | 0.00 | 0.00 |
| 209602_s_at | GATA3     | GATA binding pr    | 0.11  | -3.22 | 0.00 | 0.00 |
| 216733_s_at | GATM      | glycine amidinoti  | 0.17  | -2.52 | 0.00 | 0.00 |
| 203178_at   | GATM      | glycine amidinoti  | 0.05  | -4.26 | 0.00 | 0.00 |
| 203765_at   | GCA       | grancalcin, EF-h   | 0.22  | -2.19 | 0.00 | 0.00 |
| 203925_at   | GCLM      | glutamate-cystei   | 4.88  | 2.29  | 0.00 | 0.00 |
| 221136_at   | GDF2      | growth differentia | 3.05  | 1.61  | 0.00 | 0.00 |
| 219539_at   | GEMIN6    | gem (nuclear orç   | 4.41  | 2.14  | 0.00 | 0.00 |
| 221028_s_at | GFOD2     | glucose-fructose   | 3.45  | 1.79  | 0.00 | 0.00 |
| 202721_s_at | GFPT1     | glutamine-fructo:  | 3.66  | 1.87  | 0.00 | 0.00 |
| 209919_x_at | GGT1      | gamma-glutamyl     | 3.22  | 1.69  | 0.00 | 0.00 |
| 64064_at    | GIMAP5    | GTPase, IMAP f.    | 3.23  | 1.69  | 0.00 | 0.00 |
| 219970_at   | GIPC2     | GIPC PDZ doma      | 0.06  | -3.98 | 0.00 | 0.00 |
| 206540_at   | GLB1L     | galactosidase, b   | 3.24  | 1.69  | 0.00 | 0.00 |
| 205531_s_at | GLS2      | glutaminase 2 (li  | 0.21  | -2.27 | 0.00 | 0.00 |
| 200648_s_at | GLUL      | glutamate-ammc     | 3.15  | 1.66  | 0.00 | 0.00 |
| 218506_x_at | GLYR1     | glyoxylate reduc   | 0.28  | -1.84 | 0.00 | 0.00 |
| 201040_at   | GNAI2     | guanine nucleoti   | 3.37  | 1.75  | 0.00 | 0.00 |
| 206355_at   | GNAL      | guanine nucleoti   | 0.29  | -1.81 | 0.00 | 0.00 |
| 214071_at   | GNAL      | guanine nucleoti   | 0.21  | -2.25 | 0.00 | 0.00 |
| 207987_s_at | GNRH1     | gonadotropin-rel   | 0.23  | -2.13 | 0.00 | 0.00 |
| 208519_x_at | GNRH2     | gonadotropin-rel   | 3.95  | 1.98  | 0.00 | 0.00 |
| 201567_s_at | GOLGA4    | golgi autoantiger  | 0.25  | -1.99 | 0.00 | 0.00 |
| 215203_at   | GOLGA4    | golgi autoantiger  | 0.08  | -3.71 | 0.00 | 0.00 |
| 208798_x_at | GOLGA8A   | golgi autoantiger  | 0.28  | -1.83 | 0.00 | 0.00 |
| 208797_s_at | GOLGA8A   | golgi autoantiger  | 0.19  | -2.38 | 0.00 | 0.00 |
| 213737_x_at | GOLGA9P   | golgi autoantiger  | 0.26  | -1.94 | 0.00 | 0.00 |
| 204322_at   | GOLIM4    | golgi integral me  | 3.97  | 1.99  | 0.00 | 0.00 |

|             |         |                    |       |       |      |      |
|-------------|---------|--------------------|-------|-------|------|------|
| 218692_at   | GOLSYN  | Golgi-localized p  | 0.11  | -3.23 | 0.00 | 0.00 |
| 219846_at   | GON4L   | gon-4-like (C. elk | 0.30  | -1.75 | 0.00 | 0.00 |
| 213180_s_at | GOSR2   | golgi SNAP rece    | 5.18  | 2.37  | 0.00 | 0.00 |
| 213144_at   | GOSR2   | golgi SNAP rece    | 3.84  | 1.94  | 0.00 | 0.00 |
| 200708_at   | GOT2    | glutamic-oxaloac   | 3.09  | 1.63  | 0.00 | 0.00 |
| 209769_s_at | GP1BB   | glycoprotein Ib (I | 4.22  | 2.08  | 0.00 | 0.00 |
| 206883_x_at | GP9     | glycoprotein IX (I | 3.28  | 1.72  | 0.00 | 0.00 |
| 212510_at   | GPD1L   | glycerol-3-phosp   | 0.33  | -1.60 | 0.00 | 0.00 |
| 210007_s_at | GPD2    | glycerol-3-phosp   | 0.26  | -1.96 | 0.00 | 0.00 |
| 215554_at   | GPLD1   | glycosylphospha    | 0.03  | -4.98 | 0.00 | 0.00 |
| 209169_at   | GPM6B   | glycoprotein M6f   | 0.21  | -2.26 | 0.00 | 0.00 |
| 213094_at   | GPR126  | G protein-couple   | 0.23  | -2.15 | 0.00 | 0.00 |
| 220901_at   | GPR157  | G protein-couple   | 0.23  | -2.15 | 0.00 | 0.00 |
| 221958_s_at | GPR177  | G protein-couple   | 0.23  | -2.09 | 0.00 | 0.00 |
| 209631_s_at | GPR37   | G protein-couple   | 0.31  | -1.71 | 0.00 | 0.00 |
| 204793_at   | GPRASP1 | G protein-couple   | 0.19  | -2.39 | 0.00 | 0.00 |
| 203108_at   | GPRC5A  | G protein-couple   | 14.91 | 3.90  | 0.00 | 0.00 |
| 200736_s_at | GPX1    | glutathione pero:  | 3.84  | 1.94  | 0.00 | 0.00 |
| 202831_at   | GPX2    | glutathione pero:  | 11.52 | 3.53  | 0.00 | 0.00 |
| 201348_at   | GPX3    | glutathione pero:  | 13.28 | 3.73  | 0.00 | 0.00 |
| 214091_s_at | GPX3    | glutathione pero:  | 7.98  | 3.00  | 0.00 | 0.00 |
| 213170_at   | GPX7    | glutathione pero:  | 3.85  | 1.95  | 0.00 | 0.00 |
| 219313_at   | GRAMD1C | GRAM domain c      | 0.10  | -3.30 | 0.00 | 0.00 |
| 218706_s_at | GRAMD3  | GRAM domain c      | 0.17  | -2.55 | 0.00 | 0.00 |
| 216481_at   | GRIP2   | glutamate recept   | 5.10  | 2.35  | 0.00 | 0.00 |
| 218154_at   | GSDMD   | gasdermin D        | 3.38  | 1.76  | 0.00 | 0.00 |
| 222102_at   | GSTA3   | glutathione S-tra  | 0.11  | -3.20 | 0.00 | 0.00 |
| 200824_at   | GSTP1   | glutathione S-tra  | 3.32  | 1.73  | 0.00 | 0.00 |
| 209595_at   | GTF2F2  | general transcrip  | 0.28  | -1.82 | 0.00 | 0.00 |
| 205276_s_at | GTPBP1  | GTP binding pro    | 5.04  | 2.33  | 0.00 | 0.00 |
| 221942_s_at | GUCY1A3 | guanylate cyclas   | 4.04  | 2.02  | 0.00 | 0.00 |
| 204237_at   | GULP1   | GULP, engulfme     | 0.14  | -2.84 | 0.00 | 0.00 |
| 204235_s_at | GULP1   | GULP, engulfme     | 0.09  | -3.52 | 0.00 | 0.00 |
| 201554_x_at | GYG1    | glycogenin 1       | 3.94  | 1.98  | 0.00 | 0.00 |
| 205488_at   | GZMA    | granzyme A (gra    | 4.03  | 2.01  | 0.00 | 0.00 |
| 210164_at   | GZMB    | granzyme B (gra    | 4.60  | 2.20  | 0.00 | 0.00 |
| 208579_x_at | H2BFS   | H2B histone fam    | 5.03  | 2.33  | 0.00 | 0.00 |
| 211998_at   | H3F3B   | H3 histone, fami   | 0.29  | -1.77 | 0.00 | 0.00 |
| 221892_at   | H6PD    | hexose-6-phospl    | 0.16  | -2.61 | 0.00 | 0.00 |
| 213054_at   | HAUS5   | HAUS augmin-lil    | 0.25  | -2.01 | 0.00 | 0.00 |
| 218602_s_at | HAUS6   | HAUS augmin-lil    | 0.19  | -2.44 | 0.00 | 0.00 |
| 217232_x_at | HBB     | hemoglobin, bet:   | 6.01  | 2.59  | 0.00 | 0.00 |
| 209116_x_at | HBB     | hemoglobin, bet:   | 4.20  | 2.07  | 0.03 | 0.04 |
| 38037_at    | HBEGF   | heparin-binding I  | 10.71 | 3.42  | 0.00 | 0.00 |
| 203821_at   | HBEGF   | heparin-binding I  | 5.46  | 2.45  | 0.00 | 0.00 |
| 209314_s_at | HBS1L   | HBS1-like (S. ce   | 0.18  | -2.51 | 0.00 | 0.00 |
| 209315_at   | HBS1L   | HBS1-like (S. ce   | 0.12  | -3.09 | 0.00 | 0.00 |
| 203746_s_at | HCCS    | holocytochrome     | 4.12  | 2.04  | 0.00 | 0.00 |

|             |           |                   |       |       |      |      |
|-------------|-----------|-------------------|-------|-------|------|------|
| 214893_x_at | HCN2      | hyperpolarizati   | 3.09  | 1.63  | 0.00 | 0.00 |
| 216224_s_at | HDAC6     | histone deacetyl  | 3.78  | 1.92  | 0.00 | 0.00 |
| 207067_s_at | HDC       | histidine decarbc | 3.14  | 1.65  | 0.00 | 0.00 |
| 213069_at   | HEG1      | HEG homolog 1     | 3.85  | 1.94  | 0.00 | 0.00 |
| 220085_at   | HELLS     | helicase, lymphc  | 0.23  | -2.11 | 0.00 | 0.00 |
| 218306_s_at | HERC1     | hect (homologou   | 0.33  | -1.59 | 0.00 | 0.00 |
| 219352_at   | HERC6     | hect domain and   | 9.74  | 3.28  | 0.00 | 0.00 |
| 214308_s_at | HGD       | homogentisate 1   | 3.46  | 1.79  | 0.00 | 0.00 |
| 221162_at   | HHLA1     | HERV-H LTR-as     | 3.31  | 1.73  | 0.00 | 0.00 |
| 216911_s_at | HIC2      | hypermethylated   | 3.30  | 1.72  | 0.00 | 0.00 |
| 212293_at   | HIPK1     | homeodomain in    | 0.15  | -2.77 | 0.00 | 0.00 |
| 214542_x_at | HIST1H2AI | histone cluster 1 | 7.37  | 2.88  | 0.00 | 0.00 |
| 208583_x_at | HIST1H2AJ | histone cluster 1 | 10.93 | 3.45  | 0.00 | 0.00 |
| 214455_at   | HIST1H2BC | histone cluster 1 | 4.14  | 2.05  | 0.00 | 0.00 |
| 208527_x_at | HIST1H2BE | histone cluster 1 | 3.10  | 1.63  | 0.00 | 0.00 |
| 208490_x_at | HIST1H2BF | histone cluster 1 | 4.95  | 2.31  | 0.00 | 0.00 |
| 209806_at   | HIST1H2BK | histone cluster 1 | 4.34  | 2.12  | 0.00 | 0.00 |
| 204512_at   | HIVEP1    | human immunoc     | 0.24  | -2.04 | 0.00 | 0.00 |
| 220042_x_at | HIVEP3    | human immunoc     | 4.48  | 2.16  | 0.00 | 0.00 |
| 222305_at   | HK2       | hexokinase 2      | 3.27  | 1.71  | 0.00 | 0.00 |
| 205671_s_at | HLA-DOB   | major histocomp   | 3.10  | 1.63  | 0.00 | 0.00 |
| 213537_at   | HLA-DPA1  | major histocomp   | 3.70  | 1.89  | 0.00 | 0.00 |
| 204755_x_at | HLF       | hepatic leukemia  | 0.17  | -2.54 | 0.00 | 0.00 |
| 204754_at   | HLF       | hepatic leukemia  | 0.12  | -3.01 | 0.00 | 0.00 |
| 204753_s_at | HLF       | hepatic leukemia  | 0.09  | -3.43 | 0.00 | 0.00 |
| 216548_x_at | HMGB3L1   | high-mobility gro | 3.25  | 1.70  | 0.00 | 0.00 |
| 207353_s_at | HMX1      | H6 family homec   | 3.94  | 1.98  | 0.00 | 0.00 |
| 217755_at   | HN1       | hematological ar  | 5.31  | 2.41  | 0.00 | 0.00 |
| 222040_at   | HNRNPA1   | heterogeneous r   | 0.32  | -1.65 | 0.01 | 0.01 |
| 221919_at   | HNRNPA1   | heterogeneous r   | 0.07  | -3.79 | 0.00 | 0.00 |
| 211930_at   | HNRNPA3   | heterogeneous r   | 0.28  | -1.82 | 0.00 | 0.00 |
| 221480_at   | HNRNPD    | heterogeneous r   | 0.33  | -1.61 | 0.00 | 0.00 |
| 213359_at   | HNRNPD    | heterogeneous r   | 0.25  | -2.03 | 0.00 | 0.00 |
| 213472_at   | HNRNPH1   | heterogeneous r   | 0.21  | -2.27 | 0.00 | 0.00 |
| 202072_at   | HNRNPL    | heterogeneous r   | 4.27  | 2.09  | 0.00 | 0.00 |
| 221860_at   | HNRNPL    | heterogeneous r   | 0.30  | -1.72 | 0.00 | 0.00 |
| 66053_at    | HNRNPUL2  | heterogeneous r   | 0.26  | -1.94 | 0.00 | 0.00 |
| 212454_x_at | HNRPDL    | heterogeneous r   | 0.22  | -2.16 | 0.00 | 0.00 |
| 222222_s_at | HOMER3    | homer homolog     | 5.57  | 2.48  | 0.00 | 0.00 |
| 204647_at   | HOMER3    | homer homolog     | 3.25  | 1.70  | 0.00 | 0.00 |
| 213150_at   | HOXA10    | homeobox A10      | 0.31  | -1.69 | 0.00 | 0.00 |
| 209905_at   | HOXA9     | homeobox A9       | 0.13  | -2.91 | 0.00 | 0.00 |
| 214651_s_at | HOXA9     | homeobox A9       | 0.10  | -3.33 | 0.00 | 0.00 |
| 208224_at   | HOXB1     | homeobox B1       | 4.46  | 2.16  | 0.00 | 0.00 |
| 204779_s_at | HOXB7     | homeobox B7       | 7.90  | 2.98  | 0.00 | 0.00 |
| 216973_s_at | HOXB7     | homeobox B7       | 3.51  | 1.81  | 0.00 | 0.00 |
| 204778_x_at | HOXB7     | homeobox B7       | 3.28  | 1.72  | 0.00 | 0.00 |
| 219832_s_at | HOXC13    | homeobox C13      | 3.47  | 1.79  | 0.00 | 0.00 |

|             |          |                    |       |       |      |      |
|-------------|----------|--------------------|-------|-------|------|------|
| 206858_s_at | HOXC6    | homeobox C6        | 0.17  | -2.57 | 0.00 | 0.00 |
| 221350_at   | HOXC8    | homeobox C8        | 0.16  | -2.64 | 0.00 | 0.00 |
| 214604_at   | HOXD11   | homeobox D11       | 7.88  | 2.98  | 0.00 | 0.00 |
| 205522_at   | HOXD4    | homeobox D4        | 6.49  | 2.70  | 0.00 | 0.00 |
| 220633_s_at | HP1BP3   | heterochromatin    | 3.75  | 1.91  | 0.00 | 0.00 |
| 211549_s_at | HPGD     | hydroxyprostagl    | 0.28  | -1.83 | 0.00 | 0.00 |
| 203913_s_at | HPGD     | hydroxyprostagl    | 0.18  | -2.46 | 0.00 | 0.00 |
| 203914_x_at | HPGD     | hydroxyprostagl    | 0.14  | -2.80 | 0.00 | 0.00 |
| 211548_s_at | HPGD     | hydroxyprostagl    | 0.08  | -3.66 | 0.00 | 0.00 |
| 206726_at   | HPGDS    | hematopoietic pr   | 0.15  | -2.72 | 0.00 | 0.00 |
| 54037_at    | HPS4     | Hermansky-Pudl     | 0.22  | -2.20 | 0.00 | 0.00 |
| 219984_s_at | HRASLS   | HRAS-like suppr    | 0.12  | -3.09 | 0.00 | 0.00 |
| 219983_at   | HRASLS   | HRAS-like suppr    | 0.04  | -4.71 | 0.00 | 0.00 |
| 221663_x_at | HRH3     | histamine recept   | 4.60  | 2.20  | 0.00 | 0.00 |
| 205466_s_at | HS3ST1   | heparan sulfate    | 3.92  | 1.97  | 0.00 | 0.00 |
| 205404_at   | HSD11B1  | hydroxysteroid (   | 0.26  | -1.95 | 0.00 | 0.00 |
| 219113_x_at | HSD17B14 | hydroxysteroid (   | 5.20  | 2.38  | 0.00 | 0.00 |
| 204818_at   | HSD17B2  | hydroxysteroid (   | 3.86  | 1.95  | 0.00 | 0.00 |
| 205700_at   | HSD17B6  | hydroxysteroid (   | 3.56  | 1.83  | 0.00 | 0.00 |
| 209512_at   | HSDL2    | hydroxysteroid d   | 0.33  | -1.61 | 0.01 | 0.01 |
| 209657_s_at | HSF2     | heat shock trans   | 0.15  | -2.74 | 0.00 | 0.00 |
| 210338_s_at | HSPA8    | heat shock 70kD    | 4.13  | 2.05  | 0.01 | 0.01 |
| 208687_x_at | HSPA8    | heat shock 70kD    | 3.56  | 1.83  | 0.00 | 0.00 |
| 214163_at   | HSPB11   | heat shock prote   | 0.31  | -1.69 | 0.00 | 0.00 |
| 219998_at   | HSPC159  | galectin-related   | 0.28  | -1.83 | 0.00 | 0.00 |
| 201655_s_at | HSPG2    | heparan sulfate    | 3.27  | 1.71  | 0.00 | 0.00 |
| 208744_x_at | HSPH1    | heat shock 105k    | 3.58  | 1.84  | 0.00 | 0.00 |
| 206976_s_at | HSPH1    | heat shock 105k    | 3.49  | 1.80  | 0.00 | 0.00 |
| 207578_s_at | HTR4     | 5-hydroxytryptan   | 3.64  | 1.86  | 0.00 | 0.00 |
| 204883_s_at | HUS1     | HUS1 checkpoin     | 3.33  | 1.74  | 0.00 | 0.00 |
| 215513_at   | HYMA1    | hydatidiform mol   | 0.06  | -4.03 | 0.00 | 0.00 |
| 202637_s_at | ICAM1    | intercellular adhe | 4.63  | 2.21  | 0.00 | 0.00 |
| 204569_at   | ICK      | intestinal cell (M | 0.12  | -3.08 | 0.00 | 0.00 |
| 201609_x_at | ICMT     | isoprenylcysteine  | 3.20  | 1.68  | 0.00 | 0.00 |
| 208937_s_at | ID1      | inhibitor of DNA   | 8.60  | 3.10  | 0.00 | 0.00 |
| 209293_x_at | ID4      | inhibitor of DNA   | 0.10  | -3.32 | 0.00 | 0.00 |
| 209291_at   | ID4      | inhibitor of DNA   | 0.04  | -4.82 | 0.00 | 0.00 |
| 209292_at   | ID4      | inhibitor of DNA   | 0.03  | -5.35 | 0.00 | 0.00 |
| 210029_at   | IDO1     | indoleamine 2,3-   | 7.24  | 2.86  | 0.00 | 0.00 |
| 202438_x_at | IDS      | iduronate 2-sulfa  | 0.26  | -1.94 | 0.00 | 0.00 |
| 209721_s_at | IFFO1    | intermediate filar | 3.09  | 1.63  | 0.00 | 0.00 |
| 202411_at   | IFI27    | interferon, alpha  | 21.64 | 4.44  | 0.00 | 0.00 |
| 201422_at   | IFI30    | interferon, gamm   | 3.06  | 1.62  | 0.00 | 0.00 |
| 209417_s_at | IFI35    | interferon-induce  | 3.95  | 1.98  | 0.00 | 0.00 |
| 214453_s_at | IFI44    | interferon-induce  | 9.37  | 3.23  | 0.00 | 0.00 |
| 204439_at   | IFI44L   | interferon-induce  | 6.62  | 2.73  | 0.00 | 0.00 |
| 204415_at   | IFI6     | interferon, alpha  | 10.31 | 3.37  | 0.00 | 0.00 |
| 203153_at   | IFIT1    | interferon-induce  | 7.44  | 2.90  | 0.00 | 0.00 |



|             |         |                     |       |       |      |      |
|-------------|---------|---------------------|-------|-------|------|------|
| 204747_at   | IFIT3   | interferon-induce   | 4.01  | 2.00  | 0.00 | 0.00 |
| 214022_s_at | IFITM1  | interferon induce   | 12.07 | 3.59  | 0.00 | 0.00 |
| 201601_x_at | IFITM1  | interferon induce   | 11.06 | 3.47  | 0.00 | 0.00 |
| 201315_x_at | IFITM2  | interferon induce   | 8.01  | 3.00  | 0.00 | 0.00 |
| 212203_x_at | IFITM3  | interferon induce   | 8.52  | 3.09  | 0.00 | 0.00 |
| 201642_at   | IFNGR2  | interferon gamm     | 3.38  | 1.76  | 0.00 | 0.00 |
| 219174_at   | IFT74   | intraflagellar tran | 0.20  | -2.33 | 0.00 | 0.00 |
| 61732_r_at  | IFT74   | intraflagellar tran | 0.19  | -2.41 | 0.00 | 0.00 |
| 202718_at   | IGFBP2  | insulin-like growt  | 5.64  | 2.50  | 0.00 | 0.00 |
| 203424_s_at | IGFBP5  | insulin-like growt  | 0.23  | -2.10 | 0.00 | 0.00 |
| 211959_at   | IGFBP5  | insulin-like growt  | 0.19  | -2.36 | 0.01 | 0.02 |
| 203851_at   | IGFBP6  | insulin-like growt  | 18.12 | 4.18  | 0.00 | 0.00 |
| 201163_s_at | IGFBP7  | insulin-like growt  | 5.07  | 2.34  | 0.00 | 0.00 |
| 201162_at   | IGFBP7  | insulin-like growt  | 3.25  | 1.70  | 0.01 | 0.01 |
| 31861_at    | IGHMBP2 | immunoglobulin      | 9.62  | 3.27  | 0.00 | 0.00 |
| 217148_x_at | IGL@    | immunoglobulin      | 3.36  | 1.75  | 0.00 | 0.00 |
| 215255_at   | IGSF9B  | immunoglobulin      | 0.29  | -1.78 | 0.00 | 0.00 |
| 202490_at   | IKBKAP  | inhibitor of kapp   | 0.30  | -1.75 | 0.00 | 0.00 |
| 36004_at    | IKBKG   | inhibitor of kapp   | 7.78  | 2.96  | 0.00 | 0.00 |
| 209929_s_at | IKBKG   | inhibitor of kapp   | 4.53  | 2.18  | 0.00 | 0.00 |
| 201888_s_at | IL13RA1 | interleukin 13 rec  | 6.32  | 2.66  | 0.00 | 0.00 |
| 211612_s_at | IL13RA1 | interleukin 13 rec  | 5.01  | 2.33  | 0.00 | 0.00 |
| 201887_at   | IL13RA1 | interleukin 13 rec  | 3.10  | 1.63  | 0.00 | 0.00 |
| 64440_at    | IL17RC  | interleukin 17 rec  | 7.45  | 2.90  | 0.00 | 0.00 |
| 206295_at   | IL18    | interleukin 18 (in  | 0.27  | -1.90 | 0.00 | 0.00 |
| 219323_s_at | IL18BP  | interleukin 18 bir  | 3.71  | 1.89  | 0.00 | 0.00 |
| 205067_at   | IL1B    | interleukin 1, bet  | 8.77  | 3.13  | 0.00 | 0.00 |
| 39402_at    | IL1B    | interleukin 1, bet  | 8.47  | 3.08  | 0.00 | 0.00 |
| 221470_s_at | IL1F7   | interleukin 1 fam   | 0.08  | -3.72 | 0.00 | 0.00 |
| 220322_at   | IL1F9   | interleukin 1 fam   | 4.62  | 2.21  | 0.00 | 0.00 |
| 202948_at   | IL1R1   | interleukin 1 rec   | 0.26  | -1.97 | 0.00 | 0.00 |
| 205403_at   | IL1R2   | interleukin 1 rec   | 0.28  | -1.86 | 0.00 | 0.00 |
| 211372_s_at | IL1R2   | interleukin 1 rec   | 0.27  | -1.92 | 0.00 | 0.00 |
| 207526_s_at | IL1RL1  | interleukin 1 rec   | 3.33  | 1.74  | 0.00 | 0.00 |
| 212659_s_at | IL1RN   | interleukin 1 rec   | 5.81  | 2.54  | 0.00 | 0.00 |
| 219115_s_at | IL20RA  | interleukin 20 rec  | 0.17  | -2.56 | 0.00 | 0.00 |
| 206569_at   | IL24    | interleukin 24      | 6.74  | 2.75  | 0.00 | 0.00 |
| 203233_at   | IL4R    | interleukin 4 rec   | 5.92  | 2.57  | 0.00 | 0.00 |
| 206693_at   | IL7     | interleukin 7       | 0.05  | -4.35 | 0.00 | 0.00 |
| 205798_at   | IL7R    | interleukin 7 rec   | 9.45  | 3.24  | 0.00 | 0.00 |
| 202859_x_at | IL8     | interleukin 8       | 4.96  | 2.31  | 0.01 | 0.01 |
| 207094_at   | IL8RA   | interleukin 8 rec   | 4.14  | 2.05  | 0.00 | 0.00 |
| 208930_s_at | ILF3    | interleukin enhar   | 0.22  | -2.22 | 0.00 | 0.00 |
| 204465_s_at | INA     | intermexin neuroi   | 3.38  | 1.76  | 0.00 | 0.00 |
| 214705_at   | INADL   | InaD-like (Droso    | 0.06  | -4.03 | 0.00 | 0.00 |
| 210511_s_at | INHBA   | inhibin, beta A     | 10.89 | 3.44  | 0.00 | 0.00 |
| 205258_at   | INHBB   | inhibin, beta B     | 6.38  | 2.67  | 0.00 | 0.00 |
| 202781_s_at | INPP5K  | inositol polyphos   | 3.01  | 1.59  | 0.00 | 0.00 |

|             |         |                     |      |       |      |      |
|-------------|---------|---------------------|------|-------|------|------|
| 218783_at   | INTS7   | integrator compl    | 0.26 | -1.93 | 0.00 | 0.00 |
| 221185_s_at | IQCG    | IQ motif containi   | 9.26 | 3.21  | 0.00 | 0.00 |
| 203907_s_at | IQSEC1  | IQ motif and Sec    | 4.22 | 2.08  | 0.00 | 0.00 |
| 202531_at   | IRF1    | interferon regula   | 4.25 | 2.09  | 0.00 | 0.00 |
| 209184_s_at | IRS2    | insulin receptor ε  | 0.26 | -1.94 | 0.00 | 0.00 |
| 209185_s_at | IRS2    | insulin receptor ε  | 0.25 | -2.00 | 0.00 | 0.00 |
| 210239_at   | IRX5    | iroquois homeob     | 0.22 | -2.22 | 0.00 | 0.00 |
| 205483_s_at | ISG15   | ISG15 ubiquitin-l   | 7.16 | 2.84  | 0.00 | 0.00 |
| 33304_at    | ISG20   | interferon stimul   | 4.59 | 2.20  | 0.00 | 0.00 |
| 204698_at   | ISG20   | interferon stimul   | 4.16 | 2.06  | 0.00 | 0.00 |
| 207191_s_at | ISLR    | immunoglobulin      | 3.01 | 1.59  | 0.00 | 0.00 |
| 218170_at   | ISOC1   | isochorismatase     | 0.16 | -2.69 | 0.00 | 0.00 |
| 218893_at   | ISOC2   | isochorismatase     | 5.24 | 2.39  | 0.00 | 0.00 |
| 205032_at   | ITGA2   | integrin, alpha 2   | 4.84 | 2.27  | 0.00 | 0.00 |
| 201474_s_at | ITGA3   | integrin, alpha 3   | 5.99 | 2.58  | 0.00 | 0.00 |
| 201389_at   | ITGA5   | integrin, alpha 5   | 3.73 | 1.90  | 0.00 | 0.00 |
| 215177_s_at | ITGA6   | integrin, alpha 6   | 6.48 | 2.70  | 0.00 | 0.00 |
| 202747_s_at | ITM2A   | integral membra     | 0.21 | -2.22 | 0.00 | 0.00 |
| 202746_at   | ITM2A   | integral membra     | 0.11 | -3.19 | 0.00 | 0.00 |
| 211360_s_at | ITPR2   | inositol 1,4,5-trip | 0.30 | -1.73 | 0.00 | 0.00 |
| 202661_at   | ITPR2   | inositol 1,4,5-trip | 0.23 | -2.15 | 0.00 | 0.00 |
| 202660_at   | ITPR2   | inositol 1,4,5-trip | 0.15 | -2.78 | 0.00 | 0.00 |
| 202662_s_at | ITPR2   | inositol 1,4,5-trip | 0.13 | -2.92 | 0.00 | 0.00 |
| 209298_s_at | ITSN1   | intersectin 1 (SH   | 0.25 | -2.02 | 0.00 | 0.00 |
| 216495_x_at | IVD     | isovaleryl Coenz    | 5.30 | 2.41  | 0.00 | 0.00 |
| 214599_at   | IVL     | involucrin          | 6.13 | 2.62  | 0.01 | 0.01 |
| 205841_at   | JAK2    | Janus kinase 2      | 0.19 | -2.37 | 0.00 | 0.00 |
| 201466_s_at | JUN     | jun oncogene        | 7.88 | 2.98  | 0.00 | 0.00 |
| 201464_x_at | JUN     | jun oncogene        | 4.44 | 2.15  | 0.00 | 0.00 |
| 201465_s_at | JUN     | jun oncogene        | 3.56 | 1.83  | 0.00 | 0.00 |
| 203845_at   | KAT2B   | K(lysine) acetyltr  | 0.31 | -1.68 | 0.00 | 0.00 |
| 219106_s_at | KBTBD10 | kelch repeat and    | 0.24 | -2.08 | 0.00 | 0.00 |
| 210078_s_at | KCNAB1  | potassium voltaç    | 0.17 | -2.57 | 0.00 | 0.00 |
| 210119_at   | KCNJ15  | potassium inwar     | 8.35 | 3.06  | 0.00 | 0.00 |
| 206765_at   | KCNJ2   | potassium inwar     | 0.15 | -2.72 | 0.00 | 0.00 |
| 220727_at   | KCNK10  | potassium chanr     | 3.13 | 1.65  | 0.00 | 0.00 |
| 220412_x_at | KCNK7   | potassium chanr     | 0.33 | -1.60 | 0.00 | 0.00 |
| 221584_s_at | KCNMA1  | potassium large     | 9.41 | 3.24  | 0.00 | 0.00 |
| 206231_at   | KCNN1   | potassium intern    | 5.58 | 2.48  | 0.00 | 0.00 |
| 211217_s_at | KCNQ1   | potassium voltaç    | 3.49 | 1.81  | 0.00 | 0.00 |
| 207366_at   | KCNS1   | potassium voltaç    | 3.38 | 1.76  | 0.00 | 0.00 |
| 212188_at   | KCTD12  | potassium chanr     | 0.32 | -1.65 | 0.00 | 0.00 |
| 45653_at    | KCTD13  | potassium chanr     | 0.25 | -2.00 | 0.00 | 0.00 |
| 217894_at   | KCTD3   | potassium chanr     | 0.10 | -3.29 | 0.00 | 0.00 |
| 200922_at   | KDEL1   | KDEL (Lys-Asp-l     | 3.72 | 1.89  | 0.00 | 0.00 |
| 204017_at   | KDEL3   | KDEL (Lys-Asp-l     | 4.25 | 2.09  | 0.00 | 0.00 |
| 212689_s_at | KDM3A   | lysine (K)-specifi  | 0.33 | -1.59 | 0.00 | 0.00 |
| 209984_at   | KDM4C   | lysine (K)-specifi  | 0.18 | -2.47 | 0.00 | 0.00 |

|             |          |                    |        |       |      |      |
|-------------|----------|--------------------|--------|-------|------|------|
| 202383_at   | KDM5C    | lysine (K)-specifi | 3.40   | 1.76  | 0.00 | 0.00 |
| 203991_s_at | KDM6A    | lysine (K)-specifi | 0.20   | -2.33 | 0.00 | 0.00 |
| 41387_r_at  | KDM6B    | lysine (K)-specifi | 3.08   | 1.62  | 0.00 | 0.00 |
| 212523_s_at | KIAA0146 | KIAA0146           | 0.20   | -2.35 | 0.00 | 0.00 |
| 212057_at   | KIAA0182 | KIAA0182           | 0.19   | -2.40 | 0.00 | 0.00 |
| 38892_at    | KIAA0240 | KIAA0240           | 0.22   | -2.18 | 0.00 | 0.00 |
| 213208_at   | KIAA0240 | KIAA0240           | 0.19   | -2.39 | 0.00 | 0.00 |
| 212427_at   | KIAA0368 | KIAA0368           | 0.19   | -2.43 | 0.00 | 0.00 |
| 202386_s_at | KIAA0430 | KIAA0430           | 0.28   | -1.85 | 0.00 | 0.00 |
| 203900_at   | KIAA0467 | KIAA0467           | 0.24   | -2.04 | 0.00 | 0.00 |
| 214295_at   | KIAA0485 | hypothetical LOC   | 0.20   | -2.32 | 0.00 | 0.00 |
| 213340_s_at | KIAA0495 | KIAA0495           | 0.21   | -2.24 | 0.00 | 0.00 |
| 212943_at   | KIAA0528 | KIAA0528           | 0.16   | -2.61 | 0.00 | 0.00 |
| 204075_s_at | KIAA0562 | KIAA0562           | 0.11   | -3.17 | 0.00 | 0.00 |
| 212314_at   | KIAA0746 | KIAA0746 protei    | 4.96   | 2.31  | 0.00 | 0.00 |
| 215268_at   | KIAA0754 | KIAA0754           | 0.09   | -3.46 | 0.00 | 0.00 |
| 212633_at   | KIAA0776 | KIAA0776           | 0.22   | -2.16 | 0.00 | 0.00 |
| 213358_at   | KIAA0802 | KIAA0802           | 8.24   | 3.04  | 0.00 | 0.00 |
| 213424_at   | KIAA0895 | KIAA0895           | 0.04   | -4.68 | 0.00 | 0.00 |
| 214098_at   | KIAA1107 | KIAA1107           | 0.28   | -1.86 | 0.00 | 0.00 |
| 212942_s_at | KIAA1199 | KIAA1199           | 3.35   | 1.74  | 0.00 | 0.00 |
| 220911_s_at | KIAA1305 | KIAA1305           | 0.24   | -2.06 | 0.00 | 0.00 |
| 221901_at   | KIAA1644 | KIAA1644           | 6.32   | 2.66  | 0.00 | 0.00 |
| 52837_at    | KIAA1644 | KIAA1644           | 5.24   | 2.39  | 0.00 | 0.00 |
| 204444_at   | KIF11    | kinesin family m   | 0.29   | -1.81 | 0.01 | 0.01 |
| 220777_at   | KIF13A   | kinesin family m   | 0.31   | -1.72 | 0.01 | 0.02 |
| 202962_at   | KIF13B   | kinesin family m   | 0.31   | -1.72 | 0.00 | 0.00 |
| 208128_x_at | KIF25    | kinesin family m   | 4.15   | 2.05  | 0.00 | 0.00 |
| 203390_s_at | KIF3C    | kinesin family m   | 3.60   | 1.85  | 0.00 | 0.00 |
| 203130_s_at | KIF5C    | kinesin family m   | 0.24   | -2.09 | 0.00 | 0.00 |
| 205051_s_at | KIT      | v-kit Hardy-Zuck   | 0.16   | -2.65 | 0.00 | 0.00 |
| 221302_at   | KLF15    | Kruppel-like fact  | 4.22   | 2.08  | 0.00 | 0.00 |
| 220266_s_at | KLF4     | Kruppel-like fact  | 0.16   | -2.69 | 0.00 | 0.00 |
| 209212_s_at | KLF5     | Kruppel-like fact  | 0.25   | -2.00 | 0.00 | 0.00 |
| 209211_at   | KLF5     | Kruppel-like fact  | 0.17   | -2.55 | 0.00 | 0.00 |
| 204334_at   | KLF7     | Kruppel-like fact  | 9.98   | 3.32  | 0.00 | 0.00 |
| 219930_at   | KLF8     | Kruppel-like fact  | 0.21   | -2.27 | 0.00 | 0.00 |
| 203543_s_at | KLF9     | Kruppel-like fact  | 0.15   | -2.73 | 0.00 | 0.00 |
| 204176_at   | KLHL20   | kelch-like 20 (Dr  | 0.21   | -2.28 | 0.00 | 0.00 |
| 221986_s_at | KLHL24   | kelch-like 24 (Dr  | 0.22   | -2.21 | 0.00 | 0.00 |
| 220238_s_at | KLHL7    | kelch-like 7 (Dro  | 0.26   | -1.95 | 0.00 | 0.00 |
| 209792_s_at | KLK10    | kallikrein-related | 3.81   | 1.93  | 0.01 | 0.01 |
| 220782_x_at | KLK12    | kallikrein-related | 10.13  | 3.34  | 0.00 | 0.00 |
| 205783_at   | KLK13    | kallikrein-related | 5.14   | 2.36  | 0.00 | 0.00 |
| 204733_at   | KLK6     | kallikrein-related | 108.10 | 6.76  | 0.00 | 0.00 |
| 206316_s_at | KNTC1    | kinetochore assc   | 0.29   | -1.77 | 0.00 | 0.00 |
| 204010_s_at | KRAS     | v-Ki-ras2 Kirsten  | 0.11   | -3.18 | 0.00 | 0.00 |
| 216713_at   | KRIT1    | KRIT1, ankyrin r   | 0.27   | -1.87 | 0.00 | 0.00 |

|             |          |                    |        |       |      |      |
|-------------|----------|--------------------|--------|-------|------|------|
| 34031_i_at  | KRIT1    | KRIT1, ankyrin r   | 0.22   | -2.17 | 0.00 | 0.00 |
| 203203_s_at | KRR1     | KRR1, small sub    | 0.26   | -1.96 | 0.00 | 0.00 |
| 207023_x_at | KRT10    | keratin 10         | 0.31   | -1.70 | 0.01 | 0.02 |
| 207935_s_at | KRT13    | keratin 13         | 40.47  | 5.34  | 0.00 | 0.00 |
| 209800_at   | KRT16    | keratin 16         | 79.28  | 6.31  | 0.00 | 0.00 |
| 205157_s_at | KRT17    | keratin 17         | 37.76  | 5.24  | 0.00 | 0.00 |
| 212236_x_at | KRT17    | keratin 17         | 29.54  | 4.89  | 0.00 | 0.00 |
| 201596_x_at | KRT18    | keratin 18         | 7.69   | 2.94  | 0.00 | 0.00 |
| 201650_at   | KRT19    | keratin 19         | 11.33  | 3.50  | 0.00 | 0.00 |
| 207908_at   | KRT2     | keratin 2          | 0.02   | -5.69 | 0.00 | 0.00 |
| 218963_s_at | KRT23    | keratin 23 (histor | 0.29   | -1.78 | 0.02 | 0.03 |
| 206677_at   | KRT31    | keratin 31         | 0.20   | -2.29 | 0.00 | 0.00 |
| 206969_at   | KRT34    | keratin 34         | 5.42   | 2.44  | 0.00 | 0.00 |
| 209125_at   | KRT6A    | keratin 6A         | 644.60 | 9.33  | 0.00 | 0.00 |
| 213680_at   | KRT6B    | keratin 6B         | 725.86 | 9.50  | 0.00 | 0.00 |
| 209126_x_at | KRT6B    | keratin 6B         | 138.17 | 7.11  | 0.00 | 0.00 |
| 207065_at   | KRT75    | keratin 75         | 49.63  | 5.63  | 0.00 | 0.00 |
| 208532_x_at | KRTAP5-8 | keratin associate  | 7.75   | 2.95  | 0.00 | 0.00 |
| 217388_s_at | KYNU     | kynureninase (L-   | 15.95  | 4.00  | 0.00 | 0.00 |
| 204385_at   | KYNU     | kynureninase (L-   | 7.36   | 2.88  | 0.00 | 0.00 |
| 210663_s_at | KYNU     | kynureninase (L-   | 5.02   | 2.33  | 0.00 | 0.00 |
| 220089_at   | L2HGDH   | L-2-hydroxygluta   | 0.19   | -2.37 | 0.00 | 0.00 |
| 216076_at   | L3MBTL   | l(3)mbt-like (Dro: | 3.54   | 1.82  | 0.00 | 0.00 |
| 210306_at   | L3MBTL   | l(3)mbt-like (Dro: | 0.17   | -2.52 | 0.00 | 0.00 |
| 218701_at   | LACTB2   | lactamase, beta    | 0.25   | -2.00 | 0.00 | 0.00 |
| 216641_s_at | LAD1     | ladinin 1          | 4.12   | 2.04  | 0.00 | 0.00 |
| 207509_s_at | LAIR2    | leukocyte-associ   | 3.13   | 1.64  | 0.00 | 0.00 |
| 203726_s_at | LAMA3    | laminin, alpha 3   | 4.72   | 2.24  | 0.00 | 0.00 |
| 210089_s_at | LAMA4    | laminin, alpha 4   | 0.29   | -1.80 | 0.00 | 0.00 |
| 209270_at   | LAMB3    | laminin, beta 3    | 16.20  | 4.02  | 0.00 | 0.00 |
| 216622_at   | LAMB4    | laminin, beta 4    | 0.32   | -1.66 | 0.00 | 0.00 |
| 215516_at   | LAMB4    | laminin, beta 4    | 0.02   | -5.39 | 0.00 | 0.00 |
| 200770_s_at | LAMC1    | laminin, gamma     | 5.28   | 2.40  | 0.00 | 0.00 |
| 202267_at   | LAMC2    | laminin, gamma     | 6.77   | 2.76  | 0.00 | 0.00 |
| 202019_s_at | LANCL1   | LanC lantibiotic s | 4.04   | 2.01  | 0.00 | 0.00 |
| 201720_s_at | LAPTM5   | lysosomal protei   | 3.16   | 1.66  | 0.00 | 0.00 |
| 218651_s_at | LARP6    | La ribonucleoprc   | 3.15   | 1.65  | 0.00 | 0.00 |
| 222212_s_at | LASS2    | LAG1 homolog, i    | 3.75   | 1.91  | 0.00 | 0.00 |
| 212442_s_at | LASS6    | LAG1 homolog, i    | 0.23   | -2.15 | 0.00 | 0.00 |
| 212446_s_at | LASS6    | LAG1 homolog, i    | 0.18   | -2.44 | 0.00 | 0.00 |
| 207734_at   | LAX1     | lymphocyte trans   | 0.28   | -1.84 | 0.00 | 0.00 |
| 221011_s_at | LBH      | limb bud and hei   | 3.22   | 1.69  | 0.01 | 0.01 |
| 207710_at   | LCE2B    | late cornified env | 0.13   | -2.96 | 0.00 | 0.00 |
| 212531_at   | LCN2     | lipocalin 2        | 61.65  | 5.95  | 0.00 | 0.00 |
| 201030_x_at | LDHB     | lactate dehydrog   | 3.11   | 1.64  | 0.01 | 0.01 |
| 202068_s_at | LDLR     | low density lipop  | 3.95   | 1.98  | 0.00 | 0.00 |
| 202067_s_at | LDLR     | low density lipop  | 3.39   | 1.76  | 0.00 | 0.00 |
| 204454_at   | LDLOC1   | leucine zipper, d  | 0.21   | -2.24 | 0.00 | 0.00 |

|             |              |                    |      |       |      |      |
|-------------|--------------|--------------------|------|-------|------|------|
| 201105_at   | LGALS1       | lectin, galactosid | 7.83 | 2.97  | 0.00 | 0.00 |
| 208450_at   | LGALS2       | lectin, galactosid | 3.06 | 1.61  | 0.01 | 0.02 |
| 200923_at   | LGALS3BP     | lectin, galactosid | 7.26 | 2.86  | 0.00 | 0.00 |
| 219699_at   | LGI2         | leucine-rich repe  | 3.25 | 1.70  | 0.00 | 0.00 |
| 218326_s_at | LGR4         | leucine-rich repe  | 0.16 | -2.69 | 0.00 | 0.00 |
| 214471_x_at | LHB          | luteinizing hormc  | 3.48 | 1.80  | 0.00 | 0.00 |
| 212658_at   | LHFPL2       | lipoma HMGIC fi    | 9.80 | 3.29  | 0.00 | 0.00 |
| 208333_at   | LHX5         | LIM homeobox 5     | 3.15 | 1.66  | 0.00 | 0.00 |
| 205266_at   | LIF          | leukemia inhibitc  | 0.26 | -1.92 | 0.00 | 0.00 |
| 211336_x_at | LILRB1       | leukocyte immur    | 4.03 | 2.01  | 0.00 | 0.00 |
| 207104_x_at | LILRB1       | leukocyte immur    | 3.20 | 1.68  | 0.00 | 0.00 |
| 217892_s_at | LIMA1        | LIM domain and     | 4.09 | 2.03  | 0.00 | 0.00 |
| 204356_at   | LIMK1        | LIM domain kina    | 3.79 | 1.92  | 0.00 | 0.00 |
| 204357_s_at | LIMK1        | LIM domain kina    | 3.21 | 1.68  | 0.00 | 0.00 |
| 201847_at   | LIPA         | lipase A, lysosor  | 6.62 | 2.73  | 0.00 | 0.00 |
| 219181_at   | LIPG         | lipase, endotheli  | 6.07 | 2.60  | 0.00 | 0.00 |
| 206123_at   | LLGL1        | lethal giant larva | 4.21 | 2.07  | 0.00 | 0.00 |
| 46142_at    | LMF1         | lipase maturator   | 0.26 | -1.96 | 0.00 | 0.00 |
| 31837_at    | LMF2         | lipase maturator   | 3.69 | 1.88  | 0.00 | 0.00 |
| 212682_s_at | LMF2         | lipase maturator   | 3.02 | 1.59  | 0.00 | 0.00 |
| 217548_at   | LOC100129502 | hypothetical prot  | 0.31 | -1.70 | 0.00 | 0.00 |
| 214850_at   | LOC100170939 | glucuronidase, b   | 0.21 | -2.25 | 0.00 | 0.00 |
| 213089_at   | LOC100272216 | hypothetical LOC   | 0.22 | -2.18 | 0.00 | 0.00 |
| 213605_s_at | LOC100272216 | hypothetical LOC   | 0.18 | -2.51 | 0.00 | 0.00 |
| 213703_at   | LOC150759    | hypothetical prot  | 0.13 | -2.99 | 0.00 | 0.00 |
| 215978_x_at | LOC152719    | hypothetical prot  | 3.14 | 1.65  | 0.00 | 0.00 |
| 220609_at   | LOC202181    | hypothetical prot  | 0.06 | -4.02 | 0.00 | 0.00 |
| 213510_x_at | LOC220594    | TL132 protein      | 0.29 | -1.77 | 0.00 | 0.00 |
| 221949_at   | LOC222070    | hypothetical prot  | 0.27 | -1.87 | 0.00 | 0.00 |
| 217219_at   | LOC26102     | hypothetical LOC   | 3.62 | 1.86  | 0.00 | 0.00 |
| 217506_at   | LOC339290    | hypothetical LOC   | 0.27 | -1.89 | 0.00 | 0.00 |
| 216387_x_at | LOC399804    | similar to nucleo  | 0.33 | -1.61 | 0.00 | 0.00 |
| 222347_at   | LOC644450    | hypothetical prot  | 0.27 | -1.92 | 0.01 | 0.02 |
| 222054_at   | LOC728448    | peptidylprolyl iso | 0.30 | -1.76 | 0.00 | 0.00 |
| 217667_at   | LOC729799    | SEC14-like 1 psi   | 0.17 | -2.53 | 0.00 | 0.00 |
| 214712_at   | LOC730092    | RRN3 RNA poly      | 0.27 | -1.88 | 0.00 | 0.00 |
| 215202_at   | LOC91316     | glucuronidase, b   | 4.29 | 2.10  | 0.00 | 0.00 |
| 213502_x_at | LOC91316     | glucuronidase, b   | 0.23 | -2.13 | 0.00 | 0.00 |
| 207720_at   | LOR          | loricrin           | 0.07 | -3.85 | 0.01 | 0.01 |
| 215446_s_at | LOX          | lysyl oxidase      | 6.98 | 2.80  | 0.00 | 0.00 |
| 202998_s_at | LOXL2        | lysyl oxidase-like | 5.86 | 2.55  | 0.00 | 0.00 |
| 201818_at   | LPCAT1       | lysophosphatidyl   | 5.54 | 2.47  | 0.00 | 0.00 |
| 215409_at   | LPCAT4       | lysophosphatidyl   | 0.14 | -2.84 | 0.00 | 0.00 |
| 216250_s_at | LPXN         | leupaxin           | 3.71 | 1.89  | 0.00 | 0.00 |
| 90610_at    | LRCH4        | leucine-rich repe  | 3.20 | 1.68  | 0.00 | 0.00 |
| 37796_at    | LRCH4        | leucine-rich repe  | 3.02 | 1.60  | 0.00 | 0.00 |
| 211596_s_at | LRIG1        | leucine-rich repe  | 0.27 | -1.90 | 0.00 | 0.00 |
| 220254_at   | LRP12        | low density lipop  | 0.31 | -1.68 | 0.00 | 0.00 |

|             |          |                    |       |       |      |      |
|-------------|----------|--------------------|-------|-------|------|------|
| 220253_s_at | LRP12    | low density lipop  | 0.22  | -2.18 | 0.00 | 0.00 |
| 212850_s_at | LRP4     | low density lipop  | 0.09  | -3.52 | 0.00 | 0.00 |
| 34697_at    | LRP6     | low density lipop  | 0.21  | -2.25 | 0.00 | 0.00 |
| 221740_x_at | LRRC37A2 | leucine rich repe  | 0.29  | -1.80 | 0.00 | 0.00 |
| 220220_at   | LRRC37A4 | leucine rich repe  | 0.26  | -1.96 | 0.00 | 0.00 |
| 208140_s_at | LRRC48   | leucine rich repe  | 0.21  | -2.25 | 0.00 | 0.00 |
| 222231_s_at | LRRC59   | leucine rich repe  | 9.77  | 3.29  | 0.00 | 0.00 |
| 218907_s_at | LRRC61   | leucine rich repe  | 3.78  | 1.92  | 0.00 | 0.00 |
| 212976_at   | LRRC8B   | leucine rich repe  | 0.24  | -2.07 | 0.00 | 0.00 |
| 215375_x_at | LRRFIP1  | leucine rich repe  | 0.29  | -1.79 | 0.00 | 0.00 |
| 216164_at   | LRRN2    | leucine rich repe  | 3.47  | 1.80  | 0.00 | 0.00 |
| 212924_s_at | LSM4     | LSM4 homolog,      | 3.95  | 1.98  | 0.00 | 0.00 |
| 211018_at   | LSS      | lanosterol synth   | 0.15  | -2.78 | 0.00 | 0.00 |
| 207339_s_at | LTB      | lymphotoxin beta   | 3.79  | 1.92  | 0.00 | 0.00 |
| 202729_s_at | LTBP1    | latent transformii | 18.66 | 4.22  | 0.00 | 0.00 |
| 202728_s_at | LTBP1    | latent transformii | 3.49  | 1.80  | 0.00 | 0.00 |
| 204682_at   | LTBP2    | latent transformii | 3.94  | 1.98  | 0.00 | 0.00 |
| 208835_s_at | LUC7L3   | LUC7-like 3 (S. c  | 0.23  | -2.16 | 0.00 | 0.00 |
| 201744_s_at | LUM      | lumican            | 13.07 | 3.71  | 0.00 | 0.00 |
| 205668_at   | LY75     | lymphocyte antiç   | 0.23  | -2.10 | 0.00 | 0.00 |
| 202626_s_at | LYN      | v-yes-1 Yamagu     | 3.79  | 1.92  | 0.00 | 0.00 |
| 210754_s_at | LYN      | v-yes-1 Yamagu     | 3.11  | 1.64  | 0.00 | 0.00 |
| 213975_s_at | LYZ      | lysozyme (renal    | 25.59 | 4.68  | 0.00 | 0.00 |
| 219188_s_at | MACROD1  | MACRO domain       | 0.20  | -2.36 | 0.00 | 0.00 |
| 209348_s_at | MAF      | v-maf musculoaf    | 0.28  | -1.86 | 0.00 | 0.00 |
| 209942_x_at | MAGEA3   | melanoma antig     | 5.27  | 2.40  | 0.00 | 0.00 |
| 214254_at   | MAGEA4   | melanoma antig     | 3.56  | 1.83  | 0.00 | 0.00 |
| 214612_x_at | MAGEA6   | melanoma antig     | 5.52  | 2.46  | 0.00 | 0.00 |
| 206144_at   | MAGI1    | membrane assoi     | 0.23  | -2.13 | 0.00 | 0.00 |
| 217282_at   | MAN1A2   | mannosidase, al    | 0.14  | -2.87 | 0.00 | 0.00 |
| 218918_at   | MAN1C1   | mannosidase, al    | 0.28  | -1.82 | 0.00 | 0.00 |
| 219999_at   | MAN2A2   | mannosidase, al    | 0.09  | -3.45 | 0.00 | 0.00 |
| 215498_s_at | MAP2K3   | mitogen-activate   | 0.33  | -1.62 | 0.00 | 0.00 |
| 216765_at   | MAP2K5   | mitogen-activate   | 0.12  | -3.03 | 0.00 | 0.00 |
| 216206_x_at | MAP2K7   | mitogen-activate   | 0.24  | -2.06 | 0.00 | 0.00 |
| 214786_at   | MAP3K1   | mitogen-activate   | 0.20  | -2.33 | 0.00 | 0.00 |
| 206362_x_at | MAP3K10  | mitogen-activate   | 3.80  | 1.92  | 0.00 | 0.00 |
| 205027_s_at | MAP3K8   | mitogen-activate   | 0.11  | -3.14 | 0.00 | 0.00 |
| 218311_at   | MAP4K3   | mitogen-activate   | 0.10  | -3.39 | 0.00 | 0.00 |
| 203552_at   | MAP4K5   | mitogen-activate   | 0.27  | -1.88 | 0.00 | 0.00 |
| 211081_s_at | MAP4K5   | mitogen-activate   | 0.10  | -3.36 | 0.00 | 0.00 |
| 204813_at   | MAPK10   | mitogen-activate   | 3.84  | 1.94  | 0.00 | 0.00 |
| 211500_at   | MAPK11   | mitogen-activate   | 5.42  | 2.44  | 0.00 | 0.00 |
| 210570_x_at | MAPK9    | mitogen-activate   | 3.31  | 1.73  | 0.00 | 0.00 |
| 206401_s_at | MAPT     | microtubule-assc   | 0.25  | -1.98 | 0.00 | 0.00 |
| 200644_at   | MARCKSL1 | MARCKS-like 1      | 4.84  | 2.28  | 0.00 | 0.00 |
| 214048_at   | MBD4     | methyl-CpG binc    | 0.17  | -2.54 | 0.00 | 0.00 |
| 218411_s_at | MBIP     | MAP3K12 bindin     | 0.16  | -2.63 | 0.00 | 0.00 |

|             |          |                     |       |       |      |      |
|-------------|----------|---------------------|-------|-------|------|------|
| 201151_s_at | MBNL1    | muscleblind-like    | 0.27  | -1.90 | 0.00 | 0.00 |
| 211037_s_at | MBOAT7   | membrane boun       | 3.24  | 1.70  | 0.00 | 0.00 |
| 207115_x_at | MBTD1    | mbt domain cont     | 0.21  | -2.22 | 0.00 | 0.00 |
| 208568_at   | MC2R     | melanocortin 2 r    | 3.44  | 1.78  | 0.00 | 0.00 |
| 211340_s_at | MCAM     | melanoma cell a     | 10.97 | 3.46  | 0.00 | 0.00 |
| 209087_x_at | MCAM     | melanoma cell a     | 4.93  | 2.30  | 0.00 | 0.00 |
| 209086_x_at | MCAM     | melanoma cell a     | 4.13  | 2.05  | 0.00 | 0.00 |
| 210869_s_at | MCAM     | melanoma cell a     | 3.61  | 1.85  | 0.01 | 0.01 |
| 220464_at   | MCF2L    | MCF.2 cell line d   | 0.22  | -2.19 | 0.00 | 0.00 |
| 212935_at   | MCF2L    | MCF.2 cell line d   | 0.13  | -2.95 | 0.00 | 0.00 |
| 35147_at    | MCF2L    | MCF.2 cell line d   | 0.11  | -3.26 | 0.00 | 0.00 |
| 213761_at   | MDM1     | Mdm1 nuclear pi     | 0.13  | -2.98 | 0.00 | 0.00 |
| 217542_at   | MDM2     | Mdm2 p53 bindi      | 0.33  | -1.62 | 0.00 | 0.00 |
| 212693_at   | MDN1     | MDN1, midasin I     | 0.32  | -1.67 | 0.00 | 0.00 |
| 202618_s_at | MECP2    | methyl CpG binc     | 3.11  | 1.64  | 0.00 | 0.00 |
| 202616_s_at | MECP2    | methyl CpG binc     | 0.30  | -1.74 | 0.00 | 0.00 |
| 218664_at   | MECR     | mitochondrial tra   | 5.94  | 2.57  | 0.00 | 0.00 |
| 203497_at   | MED1     | mediator comple     | 0.18  | -2.48 | 0.00 | 0.00 |
| 212208_at   | MED13L   | mediator comple     | 0.33  | -1.59 | 0.00 | 0.00 |
| 212209_at   | MED13L   | mediator comple     | 0.32  | -1.66 | 0.00 | 0.00 |
| 212207_at   | MED13L   | mediator comple     | 0.16  | -2.69 | 0.00 | 0.00 |
| 216109_at   | MED13L   | mediator comple     | 0.12  | -3.09 | 0.00 | 0.00 |
| 202611_s_at | MED14    | mediator comple     | 0.32  | -1.65 | 0.00 | 0.00 |
| 221650_s_at | MED18    | mediator comple     | 3.11  | 1.64  | 0.00 | 0.00 |
| 209363_s_at | MED21    | mediator comple     | 3.68  | 1.88  | 0.00 | 0.00 |
| 51176_at    | MED27    | mediator comple     | 3.74  | 1.90  | 0.00 | 0.00 |
| 207078_at   | MED6     | mediator comple     | 0.05  | -4.27 | 0.00 | 0.00 |
| 208328_s_at | MEF2A    | myocyte enhanc      | 0.25  | -2.03 | 0.00 | 0.00 |
| 212831_at   | MEGF9    | multiple EGF-like   | 0.21  | -2.28 | 0.00 | 0.00 |
| 204069_at   | MEIS1    | Meis homeobox       | 0.21  | -2.26 | 0.00 | 0.00 |
| 213899_at   | METAP2   | methionyl amino     | 0.29  | -1.78 | 0.00 | 0.00 |
| 220797_at   | METT10D  | methyltransferas    | 0.24  | -2.08 | 0.00 | 0.00 |
| 213653_at   | METTL3   | methyltransferas    | 0.22  | -2.20 | 0.00 | 0.00 |
| 211424_x_at | METTL7A  | methyltransferas    | 0.20  | -2.32 | 0.00 | 0.00 |
| 209703_x_at | METTL7A  | methyltransferas    | 0.20  | -2.35 | 0.00 | 0.00 |
| 203417_at   | MFAP2    | microfibrillar-ass  | 10.05 | 3.33  | 0.00 | 0.00 |
| 205442_at   | MFAP3L   | microfibrillar-ass  | 0.12  | -3.09 | 0.00 | 0.00 |
| 219858_s_at | MFSD6    | major facilitator s | 0.12  | -3.06 | 0.00 | 0.00 |
| 213403_at   | MFSD9    | major facilitator s | 0.31  | -1.67 | 0.00 | 0.00 |
| 211386_at   | MGC12488 | hypothetical prot   | 0.13  | -2.97 | 0.00 | 0.00 |
| 217553_at   | MGC87042 | STEAP family pr     | 7.67  | 2.94  | 0.00 | 0.00 |
| 211026_s_at | MGLL     | monoglyceride li    | 3.07  | 1.62  | 0.00 | 0.00 |
| 212473_s_at | MICAL2   | microtubule assc    | 4.19  | 2.07  | 0.00 | 0.00 |
| 212472_at   | MICAL2   | microtubule assc    | 3.59  | 1.84  | 0.00 | 0.00 |
| 203636_at   | MID1     | midline 1 (Opitz/   | 7.07  | 2.82  | 0.00 | 0.00 |
| 221863_at   | MIER2    | mesoderm induc      | 3.93  | 1.98  | 0.00 | 0.00 |
| 214625_s_at | MINK1    | misshapen-like k    | 3.86  | 1.95  | 0.00 | 0.00 |
| 209672_s_at | MIOS     | missing oocyte, i   | 0.31  | -1.69 | 0.00 | 0.00 |

|             |          |                    |        |       |      |      |
|-------------|----------|--------------------|--------|-------|------|------|
| 206427_s_at | MLANA    | melan-A            | 0.24   | -2.07 | 0.01 | 0.02 |
| 206426_at   | MLANA    | melan-A            | 0.20   | -2.31 | 0.02 | 0.03 |
| 212079_s_at | MLL      | myeloid/lymphoi    | 0.24   | -2.05 | 0.00 | 0.00 |
| 216845_x_at | MLL2     | myeloid/lymphoi    | 5.50   | 2.46  | 0.00 | 0.00 |
| 216382_s_at | MLL2     | myeloid/lymphoi    | 3.72   | 1.89  | 0.00 | 0.00 |
| 211071_s_at | MLLT11   | myeloid/lymphoi    | 3.91   | 1.97  | 0.00 | 0.00 |
| 204918_s_at | MLLT3    | myeloid/lymphoi    | 0.25   | -2.00 | 0.00 | 0.00 |
| 214939_x_at | MLLT4    | myeloid/lymphoi    | 3.38   | 1.76  | 0.00 | 0.00 |
| 203414_at   | MMD      | monocyte to mac    | 0.26   | -1.95 | 0.00 | 0.00 |
| 204475_at   | MMP1     | matrix metallope   | 107.82 | 6.75  | 0.00 | 0.00 |
| 205680_at   | MMP10    | matrix metallope   | 48.35  | 5.60  | 0.00 | 0.00 |
| 203878_s_at | MMP11    | matrix metallope   | 5.77   | 2.53  | 0.00 | 0.00 |
| 204580_at   | MMP12    | matrix metallope   | 32.97  | 5.04  | 0.00 | 0.00 |
| 205959_at   | MMP13    | matrix metallope   | 12.53  | 3.65  | 0.00 | 0.00 |
| 202828_s_at | MMP14    | matrix metallope   | 3.91   | 1.97  | 0.00 | 0.00 |
| 206234_s_at | MMP17    | matrix metallope   | 3.50   | 1.81  | 0.00 | 0.00 |
| 201069_at   | MMP2     | matrix metallope   | 10.50  | 3.39  | 0.00 | 0.00 |
| 205828_at   | MMP3     | matrix metallope   | 16.38  | 4.03  | 0.00 | 0.00 |
| 204259_at   | MMP7     | matrix metallope   | 5.43   | 2.44  | 0.00 | 0.00 |
| 203936_s_at | MMP9     | matrix metallope   | 19.31  | 4.27  | 0.00 | 0.00 |
| 205330_at   | MN1      | meningioma (dis    | 3.81   | 1.93  | 0.00 | 0.00 |
| 219265_at   | MOBK2B   | MOB1, Mps One      | 3.62   | 1.86  | 0.00 | 0.00 |
| 219959_at   | MOCOS    | molybdenum cof     | 4.69   | 2.23  | 0.00 | 0.00 |
| 219852_s_at | MORN1    | MORN repeat cc     | 8.14   | 3.02  | 0.00 | 0.00 |
| 221771_s_at | MPHOSPH8 | M-phase phosph     | 0.31   | -1.69 | 0.00 | 0.00 |
| 201874_at   | MPZL1    | myelin protein ze  | 11.28  | 3.50  | 0.00 | 0.00 |
| 210594_x_at | MPZL1    | myelin protein ze  | 6.93   | 2.79  | 0.00 | 0.00 |
| 210087_s_at | MPZL1    | myelin protein ze  | 6.44   | 2.69  | 0.00 | 0.00 |
| 201875_s_at | MPZL1    | myelin protein ze  | 4.40   | 2.14  | 0.00 | 0.00 |
| 203779_s_at | MPZL2    | myelin protein ze  | 3.50   | 1.81  | 0.00 | 0.00 |
| 210528_at   | MR1      | major histocomp    | 0.21   | -2.24 | 0.00 | 0.00 |
| 221692_s_at | MRPL34   | mitochondrial rib  | 0.33   | -1.60 | 0.00 | 0.00 |
| 217919_s_at | MRPL42   | mitochondrial rib  | 3.71   | 1.89  | 0.00 | 0.00 |
| 218281_at   | MRPL48   | mitochondrial rib  | 3.15   | 1.66  | 0.00 | 0.00 |
| 215919_s_at | MRPS11   | mitochondrial rib  | 0.26   | -1.95 | 0.00 | 0.00 |
| 204331_s_at | MRPS12   | mitochondrial rib  | 4.32   | 2.11  | 0.00 | 0.00 |
| 219666_at   | MS4A6A   | membrane-span      | 14.27  | 3.84  | 0.00 | 0.00 |
| 209421_at   | MSH2     | mutS homolog 2     | 0.31   | -1.69 | 0.00 | 0.00 |
| 205887_x_at | MSH3     | mutS homolog 3     | 0.17   | -2.57 | 0.00 | 0.00 |
| 218733_at   | MSL2     | male-specific letl | 0.18   | -2.47 | 0.00 | 0.00 |
| 219281_at   | MSRA     | methionine sulfo   | 3.81   | 1.93  | 0.00 | 0.00 |
| 218773_s_at | MSRB2    | methionine sulfo   | 3.70   | 1.89  | 0.00 | 0.00 |
| 213380_x_at | MSTP9    | macrophage stin    | 0.30   | -1.72 | 0.00 | 0.01 |
| 204956_at   | MTAP     | methylthioadeno    | 0.29   | -1.80 | 0.00 | 0.00 |
| 203347_s_at | MTF2     | metal response ε   | 0.22   | -2.16 | 0.00 | 0.00 |
| 220346_at   | MTHFD2L  | methylenetetrah    | 0.32   | -1.64 | 0.00 | 0.00 |
| 36920_at    | MTM1     | myotubularin 1     | 0.16   | -2.67 | 0.00 | 0.00 |
| 203212_s_at | MTMR2    | myotubularin rel   | 3.29   | 1.72  | 0.00 | 0.00 |



|             |         |                   |       |       |      |      |
|-------------|---------|-------------------|-------|-------|------|------|
| 212277_at   | MTMR4   | myotubularin rel  | 0.29  | -1.79 | 0.00 | 0.00 |
| 203774_at   | MTR     | 5-methyltetrahyc  | 0.28  | -1.85 | 0.00 | 0.00 |
| 215560_x_at | MTRF1L  | mitochondrial tra | 0.30  | -1.72 | 0.00 | 0.00 |
| 213693_s_at | MUC1    | mucin 1, cell sur | 3.82  | 1.93  | 0.00 | 0.00 |
| 216671_x_at | MUC8    | mucin 8           | 3.11  | 1.64  | 0.00 | 0.00 |
| 218246_at   | MUL1    | mitochondrial E3  | 3.31  | 1.73  | 0.00 | 0.00 |
| 36907_at    | MVK     | mevalonate kina   | 4.52  | 2.18  | 0.00 | 0.00 |
| 202086_at   | MX1     | myxovirus (influe | 34.04 | 5.09  | 0.00 | 0.00 |
| 204994_at   | MX2     | myxovirus (influe | 10.08 | 3.33  | 0.00 | 0.00 |
| 206877_at   | MXD1    | MAX dimerizatio   | 3.81  | 1.93  | 0.00 | 0.00 |
| 212509_s_at | MXRA7   | matrix-remodellin | 3.52  | 1.81  | 0.00 | 0.00 |
| 204798_at   | MYB     | v-myb myeloblas   | 0.12  | -3.11 | 0.00 | 0.00 |
| 201710_at   | MYBL2   | v-myb myeloblas   | 4.35  | 2.12  | 0.00 | 0.00 |
| 208040_s_at | MYBPC3  | myosin binding p  | 4.65  | 2.22  | 0.00 | 0.00 |
| 201960_s_at | MYCBP2  | MYC binding prc   | 0.26  | -1.92 | 0.00 | 0.00 |
| 214058_at   | MYCL1   | v-myc myelocyt    | 0.30  | -1.73 | 0.00 | 0.00 |
| 212372_at   | MYH10   | myosin, heavy cl  | 3.60  | 1.85  | 0.00 | 0.00 |
| 219946_x_at | MYH14   | myosin, heavy cl  | 8.08  | 3.02  | 0.00 | 0.00 |
| 205940_at   | MYH3    | myosin, heavy cl  | 0.28  | -1.82 | 0.00 | 0.00 |
| 220319_s_at | MYLIP   | myosin regulator  | 0.12  | -3.03 | 0.00 | 0.00 |
| 202555_s_at | MYLK    | myosin light chai | 4.98  | 2.32  | 0.01 | 0.01 |
| 212365_at   | MYO1B   | myosin IB         | 7.69  | 2.94  | 0.00 | 0.00 |
| 212364_at   | MYO1B   | myosin IB         | 4.31  | 2.11  | 0.00 | 0.00 |
| 204527_at   | MYO5A   | myosin VA (heav   | 3.63  | 1.86  | 0.00 | 0.00 |
| 203216_s_at | MYO6    | myosin VI         | 0.33  | -1.61 | 0.00 | 0.00 |
| 208452_x_at | MYO9B   | myosin IXB        | 3.15  | 1.66  | 0.00 | 0.00 |
| 206657_s_at | MYOD1   | myogenic differe  | 3.30  | 1.72  | 0.00 | 0.00 |
| 205826_at   | MYOM2   | myomesin (M-pr    | 0.24  | -2.04 | 0.00 | 0.00 |
| 219509_at   | MYOZ1   | myozenin 1        | 4.52  | 2.18  | 0.00 | 0.00 |
| 213375_s_at | N4BP2L1 | NEDD4 binding p   | 0.09  | -3.50 | 0.00 | 0.00 |
| 202258_s_at | N4BP2L2 | NEDD4 binding p   | 0.23  | -2.10 | 0.00 | 0.00 |
| 221899_at   | N4BP2L2 | NEDD4 binding p   | 0.23  | -2.10 | 0.00 | 0.00 |
| 202259_s_at | N4BP2L2 | NEDD4 binding p   | 0.15  | -2.72 | 0.00 | 0.00 |
| 214753_at   | N4BP2L2 | NEDD4 binding p   | 0.14  | -2.80 | 0.00 | 0.00 |
| 208047_s_at | NAB1    | NGFI-A binding p  | 0.33  | -1.61 | 0.00 | 0.00 |
| 204860_s_at | NAIP    | NLR family, apo   | 0.20  | -2.36 | 0.00 | 0.00 |
| 220184_at   | NANOG   | Nanog homeobo     | 0.18  | -2.52 | 0.00 | 0.00 |
| 219368_at   | NAP1L2  | nucleosome ass    | 0.09  | -3.50 | 0.00 | 0.00 |
| 204749_at   | NAP1L3  | nucleosome ass    | 0.16  | -2.66 | 0.00 | 0.00 |
| 219378_at   | NARG1L  | NMDA receptor s   | 0.25  | -1.99 | 0.00 | 0.00 |
| 221207_s_at | NBEA    | neurobeachin      | 0.28  | -1.82 | 0.00 | 0.00 |
| 212443_at   | NBEAL2  | neurobeachin-lik  | 0.24  | -2.03 | 0.00 | 0.00 |
| 201621_at   | NBL1    | neuroblastoma, s  | 3.10  | 1.63  | 0.00 | 0.00 |
| 211685_s_at | NCALD   | neurocalcin delte | 3.97  | 1.99  | 0.00 | 0.00 |
| 209556_at   | NCDN    | neurochondrin     | 6.07  | 2.60  | 0.00 | 0.00 |
| 209557_s_at | NCDN    | neurochondrin     | 5.48  | 2.46  | 0.00 | 0.00 |
| 216114_at   | NCKIPSD | NCK interacting   | 3.38  | 1.76  | 0.00 | 0.00 |
| 205731_s_at | NCOA2   | nuclear receptor  | 0.17  | -2.57 | 0.00 | 0.00 |

|             |         |                    |       |       |      |      |
|-------------|---------|--------------------|-------|-------|------|------|
| 209062_x_at | NCOA3   | nuclear receptor   | 3.16  | 1.66  | 0.00 | 0.00 |
| 217045_x_at | NCR2    | natural cytotoxic  | 4.41  | 2.14  | 0.00 | 0.00 |
| 217493_x_at | NCR2    | natural cytotoxic  | 4.16  | 2.06  | 0.00 | 0.00 |
| 218160_at   | NDUFA8  | NADH dehydrog      | 3.81  | 1.93  | 0.00 | 0.00 |
| 214241_at   | NDUFB8  | NADH dehydrog      | 0.22  | -2.17 | 0.00 | 0.00 |
| 214657_s_at | NEAT1   | nuclear paraspe    | 0.32  | -1.64 | 0.02 | 0.02 |
| 205054_at   | NEB     | nebulin            | 0.13  | -2.90 | 0.00 | 0.00 |
| 203961_at   | NEBL    | nebulette          | 0.23  | -2.10 | 0.00 | 0.00 |
| 215005_at   | NECAB2  | N-terminal EF-h    | 3.07  | 1.62  | 0.00 | 0.00 |
| 209300_s_at | NECAP1  | NECAP endocyt      | 0.31  | -1.69 | 0.00 | 0.00 |
| 212445_s_at | NEDD4L  | neural precursor   | 4.66  | 2.22  | 0.00 | 0.00 |
| 221805_at   | NEFL    | neurofilament, li  | 13.34 | 3.74  | 0.00 | 0.00 |
| 221916_at   | NEFL    | neurofilament, li  | 12.16 | 3.60  | 0.00 | 0.00 |
| 205113_at   | NEFM    | neurofilament, m   | 5.51  | 2.46  | 0.00 | 0.00 |
| 213116_at   | NEK3    | NIMA (never in r   | 0.32  | -1.64 | 0.00 | 0.00 |
| 204634_at   | NEK4    | NIMA (never in r   | 0.24  | -2.05 | 0.00 | 0.00 |
| 203413_at   | NELL2   | NEL-like 2 (chick  | 16.67 | 4.06  | 0.00 | 0.00 |
| 214125_s_at | NENF    | neuron derived r   | 3.38  | 1.76  | 0.00 | 0.00 |
| 218678_at   | NES     | nestin             | 12.01 | 3.59  | 0.00 | 0.00 |
| 218888_s_at | NETO2   | neuropilin (NRP)   | 8.61  | 3.11  | 0.00 | 0.00 |
| 204889_s_at | NEURL   | neuralized homo    | 5.47  | 2.45  | 0.00 | 0.00 |
| 216115_at   | NF1     | neurofibromin 1    | 0.24  | -2.09 | 0.00 | 0.00 |
| 214799_at   | NFASC   | neurofascin hom    | 0.16  | -2.65 | 0.00 | 0.00 |
| 213438_at   | NFASC   | neurofascin hom    | 0.13  | -2.94 | 0.00 | 0.00 |
| 208003_s_at | NFAT5   | nuclear factor of  | 0.28  | -1.86 | 0.00 | 0.00 |
| 208196_x_at | NFATC1  | nuclear factor of  | 3.04  | 1.60  | 0.00 | 0.00 |
| 210556_at   | NFATC3  | nuclear factor of  | 0.20  | -2.31 | 0.00 | 0.00 |
| 213033_s_at | NFIB    | nuclear factor I/E | 0.19  | -2.42 | 0.00 | 0.00 |
| 213029_at   | NFIB    | nuclear factor I/E | 0.17  | -2.58 | 0.00 | 0.00 |
| 211466_at   | NFIB    | nuclear factor I/E | 0.11  | -3.14 | 0.00 | 0.00 |
| 209290_s_at | NFIB    | nuclear factor I/E | 0.10  | -3.36 | 0.00 | 0.00 |
| 209289_at   | NFIB    | nuclear factor I/E | 0.05  | -4.26 | 0.00 | 0.00 |
| 213032_at   | NFIB    | nuclear factor I/E | 0.03  | -5.18 | 0.00 | 0.00 |
| 213298_at   | NFIC    | nuclear factor I/C | 0.22  | -2.16 | 0.00 | 0.00 |
| 203574_at   | NFIL3   | nuclear factor, in | 3.11  | 1.64  | 0.00 | 0.00 |
| 214062_x_at | NFKBIB  | nuclear factor of  | 3.02  | 1.59  | 0.00 | 0.00 |
| 209973_at   | NFKBIL1 | nuclear factor of  | 3.27  | 1.71  | 0.00 | 0.00 |
| 210268_at   | NFX1    | nuclear transcrip  | 0.17  | -2.57 | 0.00 | 0.00 |
| 204109_s_at | NFYA    | nuclear transcrip  | 4.29  | 2.10  | 0.00 | 0.00 |
| 218128_at   | NFYB    | nuclear transcrip  | 0.21  | -2.26 | 0.00 | 0.00 |
| 216263_s_at | NGDN    | neuroguidin, EIF   | 0.20  | -2.32 | 0.00 | 0.00 |
| 219418_at   | NHEJ1   | nonhomologous      | 3.85  | 1.95  | 0.00 | 0.00 |
| 215228_at   | NHLH2   | nescient helix lo  | 0.16  | -2.64 | 0.00 | 0.00 |
| 219353_at   | NHLRC2  | NHL repeat cont    | 0.14  | -2.86 | 0.00 | 0.00 |
| 202007_at   | NID1    | nidogen 1          | 5.73  | 2.52  | 0.00 | 0.00 |
| 219594_at   | NINJ2   | ninjurin 2         | 3.36  | 1.75  | 0.00 | 0.00 |
| 212129_at   | NIPA2   | non imprinted in   | 4.25  | 2.09  | 0.00 | 0.00 |
| 212483_at   | NIPBL   | Nipped-B homol     | 0.28  | -1.83 | 0.00 | 0.00 |

|             |          |                    |      |       |      |      |
|-------------|----------|--------------------|------|-------|------|------|
| 207108_s_at | NIPBL    | Nipped-B homol     | 0.27 | -1.88 | 0.00 | 0.00 |
| 201591_s_at | NISCH    | nischarin          | 0.30 | -1.73 | 0.00 | 0.00 |
| 205004_at   | NKRF     | NFKB repressinç    | 0.27 | -1.90 | 0.00 | 0.00 |
| 202379_s_at | NKTR     | natural killer-tum | 0.32 | -1.64 | 0.00 | 0.00 |
| 215338_s_at | NKTR     | natural killer-tum | 0.19 | -2.42 | 0.00 | 0.00 |
| 206578_at   | NKX2-5   | NK2 transcrip      | 4.70 | 2.23  | 0.00 | 0.00 |
| 221933_at   | NLGN4X   | neuroligin 4, X-li | 4.26 | 2.09  | 0.01 | 0.02 |
| 210113_s_at | NLRP1    | NLR family, pyrir  | 0.33 | -1.61 | 0.00 | 0.00 |
| 205204_at   | NMB      | neuromedin B       | 5.20 | 2.38  | 0.00 | 0.00 |
| 205005_s_at | NMT2     | N-myristoyltrans   | 0.26 | -1.92 | 0.00 | 0.00 |
| 215069_at   | NMT2     | N-myristoyltrans   | 0.24 | -2.05 | 0.00 | 0.00 |
| 215743_at   | NMT2     | N-myristoyltrans   | 0.24 | -2.09 | 0.00 | 0.00 |
| 206023_at   | NMU      | neuromedin U       | 0.23 | -2.11 | 0.00 | 0.00 |
| 202237_at   | NNMT     | nicotinamide N-r   | 8.42 | 3.07  | 0.00 | 0.00 |
| 202238_s_at | NNMT     | nicotinamide N-r   | 3.15 | 1.66  | 0.02 | 0.03 |
| 59625_at    | NOL3     | nucleolar protein  | 0.33 | -1.61 | 0.00 | 0.00 |
| 205895_s_at | NOLC1    | nucleolar and co   | 3.59 | 1.84  | 0.00 | 0.00 |
| 214011_s_at | NOP16    | NOP16 nucleola     | 3.18 | 1.67  | 0.00 | 0.00 |
| 207310_s_at | NOS1     | nitric oxide synth | 3.20 | 1.68  | 0.00 | 0.00 |
| 214722_at   | NOTCH2NL | Notch homolog 2    | 0.19 | -2.39 | 0.00 | 0.00 |
| 203238_s_at | NOTCH3   | Notch homolog 3    | 0.26 | -1.96 | 0.00 | 0.00 |
| 204501_at   | NOV      | nephroblastoma     | 0.27 | -1.92 | 0.00 | 0.00 |
| 214321_at   | NOV      | nephroblastoma     | 0.07 | -3.82 | 0.00 | 0.00 |
| 201695_s_at | NP       | nucleoside phos,   | 7.72 | 2.95  | 0.00 | 0.00 |
| 39549_at    | NPAS2    | neuronal PAS dc    | 0.28 | -1.82 | 0.00 | 0.00 |
| 211584_s_at | NPAT     | nuclear protein, i | 0.32 | -1.64 | 0.00 | 0.00 |
| 214066_x_at | NPR2     | natriuretic peptid | 0.20 | -2.32 | 0.00 | 0.00 |
| 204310_s_at | NPR2     | natriuretic peptid | 0.17 | -2.53 | 0.00 | 0.00 |
| 205440_s_at | NPY1R    | neuropeptide Y r   | 0.04 | -4.58 | 0.00 | 0.00 |
| 210519_s_at | NQO1     | NAD(P)H dehydi     | 7.00 | 2.81  | 0.00 | 0.00 |
| 201467_s_at | NQO1     | NAD(P)H dehydi     | 5.72 | 2.52  | 0.00 | 0.00 |
| 201468_s_at | NQO1     | NAD(P)H dehydi     | 4.31 | 2.11  | 0.01 | 0.01 |
| 206410_at   | NR0B2    | nuclear receptor   | 3.03 | 1.60  | 0.00 | 0.00 |
| 209119_x_at | NR2F2    | nuclear receptor   | 0.12 | -3.05 | 0.00 | 0.00 |
| 205259_at   | NR3C2    | nuclear receptor   | 0.22 | -2.20 | 0.00 | 0.00 |
| 211143_x_at | NR4A1    | nuclear receptor   | 3.75 | 1.91  | 0.00 | 0.00 |
| 202340_x_at | NR4A1    | nuclear receptor   | 3.25 | 1.70  | 0.00 | 0.00 |
| 210226_at   | NR4A1    | nuclear receptor   | 3.24 | 1.69  | 0.00 | 0.00 |
| 209959_at   | NR4A3    | nuclear receptor   | 7.03 | 2.81  | 0.00 | 0.00 |
| 219557_s_at | NRIP3    | nuclear receptor   | 5.24 | 2.39  | 0.00 | 0.00 |
| 210841_s_at | NRP2     | neuropilin 2       | 3.69 | 1.88  | 0.00 | 0.00 |
| 210683_at   | NRTN     | neurturin          | 0.11 | -3.20 | 0.00 | 0.00 |
| 221606_s_at | NSBP1    | nucleosomal bin    | 0.22 | -2.19 | 0.00 | 0.00 |
| 209279_s_at | NSDHL    | NAD(P) dependt     | 4.79 | 2.26  | 0.00 | 0.00 |
| 217831_s_at | NSFL1C   | NSFL1 (p97) cof    | 3.26 | 1.71  | 0.00 | 0.00 |
| 219067_s_at | NSMCE4A  | non-SMC eleme      | 0.31 | -1.70 | 0.00 | 0.00 |
| 222128_at   | NSUN6    | NOL1/NOP2/Sun      | 0.15 | -2.73 | 0.00 | 0.00 |
| 203939_at   | NT5E     | 5'-nucleotidase, i | 5.04 | 2.33  | 0.00 | 0.00 |

|             |        |                    |      |       |      |      |
|-------------|--------|--------------------|------|-------|------|------|
| 221796_at   | NTRK2  | neurotrophic tyrc  | 0.24 | -2.04 | 0.01 | 0.01 |
| 203978_at   | NUBP1  | nucleotide bindir  | 3.90 | 1.96  | 0.00 | 0.00 |
| 214136_at   | NUDT13 | nudix (nucleosid   | 0.13 | -2.93 | 0.00 | 0.00 |
| 213461_at   | NUDT21 | nudix (nucleosid   | 0.27 | -1.87 | 0.00 | 0.00 |
| 206303_s_at | NUDT4  | nudix (nucleosid   | 4.19 | 2.07  | 0.00 | 0.00 |
| 220183_s_at | NUDT6  | nudix (nucleosid   | 0.20 | -2.30 | 0.00 | 0.00 |
| 205134_s_at | NUFIP1 | nuclear fragile X  | 0.24 | -2.09 | 0.00 | 0.00 |
| 207545_s_at | NUMB   | numb homolog (     | 0.26 | -1.96 | 0.00 | 0.00 |
| 212709_at   | NUP160 | nucleoporin 160l   | 0.23 | -2.13 | 0.00 | 0.00 |
| 218295_s_at | NUP50  | nucleoporin 50kI   | 3.39 | 1.76  | 0.00 | 0.00 |
| 209230_s_at | NUPR1  | nuclear protein, 1 | 0.19 | -2.40 | 0.00 | 0.00 |
| 202869_at   | OAS1   | 2',5'-oligoadenyl: | 8.02 | 3.00  | 0.00 | 0.00 |
| 205552_s_at | OAS1   | 2',5'-oligoadenyl: | 5.26 | 2.39  | 0.00 | 0.00 |
| 204972_at   | OAS2   | 2'-5'-oligoadenyl: | 4.04 | 2.01  | 0.00 | 0.00 |
| 205660_at   | OASL   | 2'-5'-oligoadenyl: | 6.42 | 2.68  | 0.00 | 0.00 |
| 210797_s_at | OASL   | 2'-5'-oligoadenyl: | 5.29 | 2.40  | 0.00 | 0.00 |
| 201364_s_at | OAZ2   | ornithine decarbi  | 4.16 | 2.06  | 0.00 | 0.00 |
| 219100_at   | OBFC1  | oligonucleotide/c  | 5.31 | 2.41  | 0.00 | 0.00 |
| 220848_x_at | OBP2A  | odorant binding    | 3.93 | 1.98  | 0.00 | 0.00 |
| 206498_at   | OCA2   | oculocutaneous     | 0.32 | -1.64 | 0.01 | 0.01 |
| 200790_at   | ODC1   | ornithine decarbi  | 7.70 | 2.95  | 0.00 | 0.00 |
| 44617_at    | OGFOD2 | 2-oxoglutarate a   | 6.38 | 2.67  | 0.00 | 0.00 |
| 210443_x_at | OGFR   | opioid growth fac  | 3.10 | 1.63  | 0.00 | 0.00 |
| 212307_s_at | OGT    | O-linked N-acety   | 0.25 | -2.01 | 0.00 | 0.00 |
| 207564_x_at | OGT    | O-linked N-acety   | 0.17 | -2.55 | 0.00 | 0.00 |
| 213131_at   | OLFM1  | olfactomedin 1     | 3.94 | 1.98  | 0.01 | 0.01 |
| 218556_at   | ORMDL2 | ORM1-like 2 (S.    | 3.46 | 1.79  | 0.00 | 0.00 |
| 212582_at   | OSBPL8 | oxysterol binding  | 0.32 | -1.64 | 0.00 | 0.00 |
| 38710_at    | OTUB1  | OTU domain, ub     | 3.69 | 1.88  | 0.00 | 0.00 |
| 206604_at   | OVOL1  | ovo-like 1(Droso   | 3.36 | 1.75  | 0.00 | 0.00 |
| 202780_at   | OXCT1  | 3-oxoacid CoA tr   | 0.16 | -2.68 | 0.00 | 0.00 |
| 218197_s_at | OXR1   | oxidation resista  | 0.12 | -3.10 | 0.00 | 0.00 |
| 207091_at   | P2RX7  | purinergic recept  | 0.24 | -2.07 | 0.00 | 0.00 |
| 200654_at   | P4HB   | prolyl 4-hydroxyl  | 3.38 | 1.76  | 0.00 | 0.00 |
| 222125_s_at | P4HTM  | prolyl 4-hydroxyl  | 0.20 | -2.35 | 0.00 | 0.00 |
| 214794_at   | PA2G4  | proliferation-assr | 0.24 | -2.05 | 0.00 | 0.00 |
| 221868_at   | PAIP2B | poly(A) binding p  | 0.21 | -2.29 | 0.00 | 0.00 |
| 208876_s_at | PAK2   | p21 protein (Cdc   | 0.17 | -2.60 | 0.00 | 0.00 |
| 200906_s_at | PALLD  | palladin, cytoske  | 4.31 | 2.11  | 0.00 | 0.00 |
| 200907_s_at | PALLD  | palladin, cytoske  | 3.09 | 1.63  | 0.00 | 0.00 |
| 203859_s_at | PALM   | paralemmin         | 0.32 | -1.62 | 0.00 | 0.00 |
| 212958_x_at | PAM    | peptidylglycine a  | 5.37 | 2.42  | 0.00 | 0.00 |
| 202336_s_at | PAM    | peptidylglycine a  | 4.55 | 2.19  | 0.00 | 0.00 |
| 213661_at   | PAMR1  | peptidase domai    | 0.06 | -4.16 | 0.00 | 0.00 |
| 203117_s_at | PAN2   | PAN2 poly(A) sp    | 0.22 | -2.19 | 0.00 | 0.00 |
| 221941_at   | PAOX   | polyamine oxida    | 3.11 | 1.64  | 0.00 | 0.00 |
| 212720_at   | PAPOLA | poly(A) polymera   | 0.32 | -1.64 | 0.00 | 0.00 |
| 215374_at   | PAPOLA | poly(A) polymera   | 0.28 | -1.86 | 0.00 | 0.00 |

|             |         |                    |      |       |      |      |
|-------------|---------|--------------------|------|-------|------|------|
| 203060_s_at | PAPSS2  | 3'-phosphoadeni    | 5.18 | 2.37  | 0.00 | 0.00 |
| 203058_s_at | PAPSS2  | 3'-phosphoadeni    | 3.01 | 1.59  | 0.00 | 0.00 |
| 213372_at   | PAQR3   | progesterin and ad | 0.25 | -2.02 | 0.00 | 0.00 |
| 221527_s_at | PARD3   | par-3 partitioning | 0.23 | -2.09 | 0.00 | 0.00 |
| 205245_at   | PARD6A  | par-6 partitioning | 3.82 | 1.93  | 0.00 | 0.00 |
| 218543_s_at | PARP12  | poly (ADP-ribose   | 3.88 | 1.96  | 0.00 | 0.00 |
| 214086_s_at | PARP2   | poly (ADP-ribose   | 0.30 | -1.74 | 0.00 | 0.00 |
| 217890_s_at | PARVA   | parvin, alpha      | 6.67 | 2.74  | 0.00 | 0.00 |
| 214237_x_at | PAWR    | PRKC, apoptosis    | 5.19 | 2.38  | 0.00 | 0.00 |
| 121_at      | PAX8    | paired box 8       | 8.54 | 3.09  | 0.00 | 0.00 |
| 212825_at   | PAXIP1  | PAX interacting i  | 0.31 | -1.71 | 0.00 | 0.00 |
| 202876_s_at | PBX2    | pre-B-cell leuker  | 0.18 | -2.50 | 0.00 | 0.00 |
| 212259_s_at | PBXIP1  | pre-B-cell leuker  | 3.24 | 1.70  | 0.00 | 0.00 |
| 204476_s_at | PC      | pyruvate carboxy   | 5.70 | 2.51  | 0.00 | 0.00 |
| 203557_s_at | PCBD1   | pterin-4 alpha-ce  | 3.48 | 1.80  | 0.00 | 0.00 |
| 213264_at   | PCBP2   | poly(rC) binding   | 0.30 | -1.72 | 0.00 | 0.00 |
| 213517_at   | PCBP2   | poly(rC) binding   | 0.22 | -2.17 | 0.00 | 0.00 |
| 203860_at   | PCCA    | propionyl Coenz    | 0.18 | -2.49 | 0.00 | 0.00 |
| 213369_at   | PCDH21  | protocadherin 21   | 0.09 | -3.52 | 0.00 | 0.00 |
| 220186_s_at | PCDH24  | protocadherin 24   | 4.31 | 2.11  | 0.00 | 0.00 |
| 205534_at   | PCDH7   | protocadherin 7    | 3.23 | 1.69  | 0.01 | 0.02 |
| 210368_at   | PCDHGA8 | protocadherin ge   | 0.29 | -1.81 | 0.00 | 0.00 |
| 203378_at   | PCF11   | PCF11, cleavag     | 0.13 | -2.98 | 0.00 | 0.00 |
| 210022_at   | PCGF1   | polycomb group     | 3.13 | 1.65  | 0.00 | 0.00 |
| 203792_x_at | PCGF2   | polycomb group     | 3.73 | 1.90  | 0.00 | 0.00 |
| 213558_at   | PCLO    | piccolo (presyna   | 0.25 | -2.01 | 0.00 | 0.00 |
| 214937_x_at | PCM1    | pericentriolar ma  | 0.27 | -1.89 | 0.00 | 0.00 |
| 212406_s_at | PCMTD2  | protein-L-isoasp   | 0.16 | -2.65 | 0.00 | 0.00 |
| 215175_at   | PCNX    | pecanex homolo     | 0.33 | -1.60 | 0.00 | 0.00 |
| 205560_at   | PCSK5   | proprotein conve   | 0.25 | -2.00 | 0.00 | 0.00 |
| 205559_s_at | PCSK5   | proprotein conve   | 0.17 | -2.60 | 0.00 | 0.00 |
| 210553_x_at | PCSK6   | proprotein conve   | 3.24 | 1.70  | 0.00 | 0.00 |
| 207239_s_at | PCTK1   | PCTAIRE protei     | 3.35 | 1.75  | 0.00 | 0.00 |
| 212594_at   | PDCD4   | programmed cel     | 0.30 | -1.73 | 0.00 | 0.00 |
| 222381_at   | PDCD6   | programmed cel     | 3.23 | 1.69  | 0.00 | 0.00 |
| 204134_at   | PDE2A   | phosphodiestera    | 3.05 | 1.61  | 0.00 | 0.00 |
| 206791_s_at | PDE4C   | phosphodiestera    | 3.16 | 1.66  | 0.00 | 0.00 |
| 213388_at   | PDE4DIP | phosphodiestera    | 0.23 | -2.15 | 0.00 | 0.00 |
| 209700_x_at | PDE4DIP | phosphodiestera    | 0.21 | -2.28 | 0.00 | 0.00 |
| 203857_s_at | PDIA5   | protein disulfide  | 3.77 | 1.92  | 0.00 | 0.00 |
| 221957_at   | PKD3    | pyruvate dehydr    | 3.49 | 1.80  | 0.00 | 0.00 |
| 219165_at   | PDLIM2  | PDZ and LIM do     | 0.33 | -1.60 | 0.00 | 0.00 |
| 218690_at   | PDLIM4  | PDZ and LIM do     | 4.59 | 2.20  | 0.00 | 0.00 |
| 211564_s_at | PDLIM4  | PDZ and LIM do     | 3.58 | 1.84  | 0.00 | 0.00 |
| 203242_s_at | PDLIM5  | PDZ and LIM do     | 0.29 | -1.80 | 0.00 | 0.00 |
| 213684_s_at | PDLIM5  | PDZ and LIM do     | 0.18 | -2.51 | 0.00 | 0.00 |
| 32029_at    | PDPK1   | 3-phosphoinositi   | 3.83 | 1.94  | 0.00 | 0.00 |
| 221898_at   | PDPN    | podoplanin         | 8.04 | 3.01  | 0.00 | 0.00 |

|             |          |                   |        |       |      |      |
|-------------|----------|-------------------|--------|-------|------|------|
| 215888_at   | PDS5B    | PDS5, regulator   | 0.27   | -1.88 | 0.00 | 0.00 |
| 204742_s_at | PDS5B    | PDS5, regulator   | 0.21   | -2.29 | 0.00 | 0.00 |
| 220865_s_at | PDSS1    | prenyl (decapr    | 3.73   | 1.90  | 0.00 | 0.00 |
| 221992_at   | PDXDC2   | pyridoxal-depen   | 0.30   | -1.75 | 0.00 | 0.00 |
| 202671_s_at | PDXK     | pyridoxal (pyrido | 4.68   | 2.23  | 0.00 | 0.00 |
| 218018_at   | PDXK     | pyridoxal (pyrido | 3.84   | 1.94  | 0.00 | 0.00 |
| 209493_at   | PDZD2    | PDZ domain con    | 0.06   | -4.14 | 0.00 | 0.00 |
| 219630_at   | PDZK1IP1 | PDZK1 interactir  | 7.44   | 2.89  | 0.00 | 0.00 |
| 208982_at   | PECAM1   | platelet/endothel | 4.45   | 2.15  | 0.00 | 0.00 |
| 209242_at   | PEG3     | paternally expres | 0.10   | -3.32 | 0.00 | 0.00 |
| 219132_at   | PELI2    | pellino homolog   | 0.11   | -3.25 | 0.00 | 0.00 |
| 205251_at   | PER2     | period homolog ;  | 0.25   | -1.98 | 0.00 | 0.00 |
| 204300_at   | PET112L  | PET112-like (ye   | 4.53   | 2.18  | 0.00 | 0.00 |
| 215023_s_at | PEX1     | peroxisomal bioç  | 0.24   | -2.06 | 0.00 | 0.00 |
| 204873_at   | PEX1     | peroxisomal bioç  | 0.06   | -4.04 | 0.00 | 0.00 |
| 201706_s_at | PEX19    | peroxisomal bioç  | 5.22   | 2.38  | 0.00 | 0.00 |
| 203969_at   | PEX3     | peroxisomal bioç  | 0.09   | -3.48 | 0.00 | 0.00 |
| 207931_s_at | PFKFB2   | 6-phosphofructo   | 3.45   | 1.79  | 0.00 | 0.00 |
| 204992_s_at | PFN2     | profilin 2        | 4.42   | 2.14  | 0.00 | 0.00 |
| 213469_at   | PGAP1    | post-GPI attachr  | 0.09   | -3.53 | 0.00 | 0.00 |
| 220576_at   | PGAP1    | post-GPI attachr  | 0.03   | -4.87 | 0.00 | 0.00 |
| 219225_at   | PGBD5    | piggyBac transp   | 11.03  | 3.46  | 0.00 | 0.00 |
| 201118_at   | PGD      | phosphoglucona    | 4.26   | 2.09  | 0.00 | 0.00 |
| 209652_s_at | PGF      | placental growth  | 3.52   | 1.82  | 0.00 | 0.00 |
| 220944_at   | PGLYRP4  | peptidoglycan re  | 3.41   | 1.77  | 0.00 | 0.00 |
| 201968_s_at | PGM1     | phosphoglucom     | 3.26   | 1.70  | 0.00 | 0.00 |
| 218410_s_at | PGP      | phosphoglycolat   | 3.99   | 2.00  | 0.00 | 0.00 |
| 213227_at   | PGRMC2   | progesterone rec  | 0.23   | -2.15 | 0.00 | 0.00 |
| 218338_at   | PHC1     | polyhomeotic ho   | 3.11   | 1.64  | 0.00 | 0.00 |
| 204866_at   | PHF16    | PHD finger prote  | 0.24   | -2.05 | 0.00 | 0.00 |
| 217952_x_at | PHF3     | PHD finger prote  | 0.28   | -1.83 | 0.00 | 0.00 |
| 217951_s_at | PHF3     | PHD finger prote  | 0.13   | -2.96 | 0.00 | 0.00 |
| 215718_s_at | PHF3     | PHD finger prote  | 0.11   | -3.21 | 0.00 | 0.00 |
| 201397_at   | PHGDH    | phosphoglycerat   | 0.21   | -2.28 | 0.00 | 0.00 |
| 205450_at   | PHKA1    | phosphorylase k   | 3.74   | 1.90  | 0.00 | 0.00 |
| 217996_at   | PHLDA1   | pleckstrin homol  | 6.96   | 2.80  | 0.00 | 0.00 |
| 217997_at   | PHLDA1   | pleckstrin homol  | 6.16   | 2.62  | 0.00 | 0.00 |
| 216102_at   | PHLDB1   | pleckstrin homol  | 5.85   | 2.55  | 0.00 | 0.00 |
| 212719_at   | PHLPP1   | PH domain and l   | 0.24   | -2.05 | 0.00 | 0.00 |
| 41469_at    | PI3      | peptidase inhibit | 173.44 | 7.44  | 0.00 | 0.00 |
| 203691_at   | PI3      | peptidase inhibit | 150.23 | 7.23  | 0.00 | 0.00 |
| 209346_s_at | PI4K2A   | phosphatidylinos  | 3.42   | 1.77  | 0.00 | 0.00 |
| 217862_at   | PIAS1    | protein inhibitor | 0.32   | -1.63 | 0.00 | 0.00 |
| 37433_at    | PIAS2    | protein inhibitor | 0.12   | -3.11 | 0.00 | 0.00 |
| 213239_at   | PIBF1    | progesterone im   | 0.24   | -2.05 | 0.00 | 0.00 |
| 205281_s_at | PIGA     | phosphatidylinos  | 0.33   | -1.62 | 0.00 | 0.00 |
| 215242_at   | PIGC     | phosphatidylinos  | 0.26   | -1.96 | 0.00 | 0.00 |
| 215129_at   | PIK3C2G  | phosphoinositide  | 0.14   | -2.82 | 0.00 | 0.00 |

|             |         |                     |       |       |      |      |
|-------------|---------|---------------------|-------|-------|------|------|
| 204369_at   | PIK3CA  | phosphoinositide    | 0.17  | -2.55 | 0.00 | 0.00 |
| 217620_s_at | PIK3CB  | phosphoinositide    | 0.08  | -3.57 | 0.00 | 0.00 |
| 221757_at   | PIK3IP1 | phosphoinositide    | 4.31  | 2.11  | 0.00 | 0.00 |
| 202743_at   | PIK3R3  | phosphoinositide    | 4.31  | 2.11  | 0.00 | 0.00 |
| 213111_at   | PIKFYVE | phosphoinositide    | 0.26  | -1.93 | 0.00 | 0.00 |
| 222218_s_at | PILRA   | paired immunogl     | 0.27  | -1.88 | 0.00 | 0.00 |
| 220954_s_at | PILRB   | paired immunogl     | 0.29  | -1.78 | 0.00 | 0.00 |
| 222150_s_at | PION    | pigeon homolog      | 0.17  | -2.54 | 0.00 | 0.00 |
| 213142_x_at | PION    | pigeon homolog      | 0.13  | -2.92 | 0.00 | 0.00 |
| 205632_s_at | PIP5K1B | phosphatidylinos    | 0.23  | -2.12 | 0.00 | 0.00 |
| 219155_at   | PITPNC1 | phosphatidylinos    | 9.65  | 3.27  | 0.00 | 0.00 |
| 209587_at   | PITX1   | paired-like home    | 15.25 | 3.93  | 0.00 | 0.00 |
| 208502_s_at | PITX1   | paired-like home    | 10.99 | 3.46  | 0.00 | 0.00 |
| 218667_at   | PJA1    | praja ring finger   | 4.11  | 2.04  | 0.00 | 0.00 |
| 203688_at   | PKD2    | polycystic kidney   | 0.22  | -2.20 | 0.00 | 0.00 |
| 221061_at   | PKD2L1  | polycystic kidney   | 5.68  | 2.51  | 0.00 | 0.00 |
| 204267_x_at | PKMYT1  | protein kinase, n   | 3.85  | 1.95  | 0.00 | 0.00 |
| 212629_s_at | PKN2    | protein kinase N.   | 0.27  | -1.88 | 0.00 | 0.00 |
| 205724_at   | PKP1    | plakophilin 1 (ec   | 4.36  | 2.12  | 0.00 | 0.00 |
| 201929_s_at | PKP4    | plakophilin 4       | 0.28  | -1.85 | 0.00 | 0.00 |
| 207943_x_at | PLAGL1  | pleiomorphic adk    | 0.07  | -3.80 | 0.00 | 0.00 |
| 209318_x_at | PLAGL1  | pleiomorphic adk    | 0.06  | -3.96 | 0.00 | 0.00 |
| 207002_s_at | PLAGL1  | pleiomorphic adk    | 0.05  | -4.38 | 0.00 | 0.00 |
| 201860_s_at | PLAT    | plasminogen act     | 5.03  | 2.33  | 0.00 | 0.00 |
| 205479_s_at | PLAU    | plasminogen act     | 8.45  | 3.08  | 0.00 | 0.00 |
| 210845_s_at | PLAUR   | plasminogen act     | 8.47  | 3.08  | 0.00 | 0.00 |
| 211924_s_at | PLAUR   | plasminogen act     | 7.69  | 2.94  | 0.00 | 0.00 |
| 219011_at   | PLEKHA4 | pleckstrin homol    | 4.72  | 2.24  | 0.00 | 0.00 |
| 220952_s_at | PLEKHA5 | pleckstrin homol    | 0.33  | -1.62 | 0.00 | 0.00 |
| 219566_at   | PLEKHF1 | pleckstrin homol    | 8.15  | 3.03  | 0.00 | 0.00 |
| 212823_s_at | PLEKHG3 | pleckstrin homol    | 3.01  | 1.59  | 0.00 | 0.00 |
| 204436_at   | PLEKHO2 | pleckstrin homol    | 5.39  | 2.43  | 0.00 | 0.00 |
| 204519_s_at | PLLP    | plasma membrai      | 0.12  | -3.12 | 0.00 | 0.00 |
| 202185_at   | PLOD3   | procollagen-lysir   | 3.82  | 1.93  | 0.00 | 0.00 |
| 205190_at   | PLS1    | plastin 1 (I isofor | 0.17  | -2.53 | 0.00 | 0.00 |
| 202446_s_at | PLSCR1  | phospholipid scr    | 5.15  | 2.37  | 0.00 | 0.00 |
| 202430_s_at | PLSCR1  | phospholipid scr    | 3.00  | 1.59  | 0.00 | 0.00 |
| 56197_at    | PLSCR3  | phospholipid scr    | 5.47  | 2.45  | 0.00 | 0.00 |
| 213030_s_at | PLXNA2  | plexin A2           | 0.32  | -1.63 | 0.00 | 0.00 |
| 217875_s_at | PMEPA1  | prostate transme    | 3.15  | 1.66  | 0.00 | 0.00 |
| 206503_x_at | PML     | promyelocytic lei   | 3.09  | 1.63  | 0.00 | 0.00 |
| 179_at      | PMS2L11 | postmeiotic segr    | 12.81 | 3.68  | 0.00 | 0.00 |
| 215412_x_at | PMS2L2  | postmeiotic segr    | 0.29  | -1.77 | 0.00 | 0.00 |
| 212037_at   | PNN     | pinin, desmosorr    | 0.31  | -1.70 | 0.00 | 0.00 |
| 212036_s_at | PNN     | pinin, desmosorr    | 0.12  | -3.02 | 0.00 | 0.00 |
| 39854_r_at  | PNPLA2  | patatin-like phos   | 8.10  | 3.02  | 0.00 | 0.00 |
| 220675_s_at | PNPLA3  | patatin-like phos   | 0.19  | -2.38 | 0.00 | 0.00 |
| 219756_s_at | POF1B   | premature ovaric    | 0.11  | -3.14 | 0.00 | 0.00 |

|             |          |                    |      |       |      |      |
|-------------|----------|--------------------|------|-------|------|------|
| 215281_x_at | POGZ     | pogo transposab    | 0.27 | -1.92 | 0.00 | 0.00 |
| 214226_at   | POL3S    | polyserase 3       | 4.40 | 2.14  | 0.00 | 0.00 |
| 219380_x_at | POLH     | polymerase (DN.    | 0.23 | -2.12 | 0.00 | 0.00 |
| 219317_at   | POLI     | polymerase (DN.    | 0.24 | -2.05 | 0.00 | 0.00 |
| 202306_at   | POLR2G   | polymerase (RN.    | 3.37 | 1.75  | 0.00 | 0.00 |
| 60815_at    | POLR2J4  | polymerase (RN.    | 0.08 | -3.74 | 0.00 | 0.00 |
| 218866_s_at | POLR3K   | polymerase (RN.    | 3.03 | 1.60  | 0.00 | 0.00 |
| 217769_s_at | POMP     | proteasome mat     | 3.07 | 1.62  | 0.00 | 0.00 |
| 220632_s_at | POMT2    | protein-O-mann     | 3.79 | 1.92  | 0.00 | 0.00 |
| 219926_at   | POPDC3   | popeye domain c    | 3.64 | 1.86  | 0.00 | 0.00 |
| 210809_s_at | POSTN    | periostin, osteob  | 0.28 | -1.82 | 0.01 | 0.02 |
| 214981_at   | POSTN    | periostin, osteob  | 0.15 | -2.71 | 0.00 | 0.00 |
| 211660_at   | POU2F2   | POU class 2 hor    | 3.19 | 1.67  | 0.00 | 0.00 |
| 215355_at   | POU2F3   | POU class 2 hor    | 0.07 | -3.92 | 0.00 | 0.00 |
| 207109_at   | POU2F3   | POU class 2 hor    | 0.04 | -4.53 | 0.00 | 0.00 |
| 208345_s_at | POU3F1   | POU class 3 hor    | 0.23 | -2.13 | 0.00 | 0.00 |
| 216332_at   | POU6F1   | POU class 6 hor    | 3.50 | 1.81  | 0.00 | 0.00 |
| 212226_s_at | PPAP2B   | phosphatidic aci   | 3.05 | 1.61  | 0.01 | 0.01 |
| 219195_at   | PPARGC1A | peroxisome proli   | 0.11 | -3.17 | 0.00 | 0.00 |
| 214374_s_at | PPFIBP1  | PTPRF interactir   | 0.18 | -2.46 | 0.00 | 0.00 |
| 217602_at   | PPIA     | peptidylprolyl iso | 0.06 | -4.01 | 0.00 | 0.00 |
| 204517_at   | PPIC     | peptidylprolyl iso | 3.63 | 1.86  | 0.00 | 0.00 |
| 204518_s_at | PPIC     | peptidylprolyl iso | 3.06 | 1.61  | 0.00 | 0.00 |
| 204788_s_at | PPOX     | protoporphyrinoç   | 0.31 | -1.70 | 0.00 | 0.00 |
| 201604_s_at | PPP1R12A | protein phosphal   | 0.31 | -1.68 | 0.00 | 0.00 |
| 201603_at   | PPP1R12A | protein phosphal   | 0.29 | -1.78 | 0.00 | 0.00 |
| 216347_s_at | PPP1R13B | protein phosphal   | 0.25 | -2.01 | 0.00 | 0.00 |
| 202165_at   | PPP1R2   | protein phosphal   | 0.25 | -2.00 | 0.00 | 0.00 |
| 204284_at   | PPP1R3C  | protein phosphal   | 3.24 | 1.70  | 0.01 | 0.01 |
| 204554_at   | PPP1R3D  | protein phosphal   | 0.27 | -1.88 | 0.00 | 0.00 |
| 202886_s_at | PPP2R1B  | protein phosphal   | 3.43 | 1.78  | 0.00 | 0.00 |
| 209632_at   | PPP2R3A  | protein phosphal   | 0.25 | -2.02 | 0.00 | 0.00 |
| 219264_s_at | PPP2R3B  | protein phosphal   | 0.27 | -1.90 | 0.00 | 0.00 |
| 215705_at   | PPP5C    | protein phosphal   | 3.54 | 1.82  | 0.00 | 0.00 |
| 209826_at   | PPT2     | palmitoyl-protein  | 0.17 | -2.58 | 0.00 | 0.00 |
| 213483_at   | PPWD1    | peptidylprolyl iso | 0.24 | -2.05 | 0.00 | 0.00 |
| 216458_at   | PQLC3    | PQ loop repeat c   | 4.88 | 2.29  | 0.00 | 0.00 |
| 211531_x_at | PRB1     | proline-rich prote | 7.08 | 2.82  | 0.00 | 0.00 |
| 210597_x_at | PRB1     | proline-rich prote | 3.50 | 1.81  | 0.00 | 0.00 |
| 207752_x_at | PRB1     | proline-rich prote | 3.18 | 1.67  | 0.00 | 0.00 |
| 37022_at    | PRELP    | proline/arginine-i | 0.26 | -1.92 | 0.00 | 0.00 |
| 205628_at   | PRIM2    | primase, DNA, p    | 0.22 | -2.19 | 0.00 | 0.00 |
| 214917_at   | PRKAA1   | protein kinase, A  | 0.17 | -2.56 | 0.00 | 0.00 |
| 200604_s_at | PRKAR1A  | protein kinase, c  | 7.74 | 2.95  | 0.00 | 0.00 |
| 204843_s_at | PRKAR2A  | protein kinase, c  | 3.69 | 1.89  | 0.00 | 0.00 |
| 203680_at   | PRKAR2B  | protein kinase, c  | 0.30 | -1.75 | 0.00 | 0.00 |
| 209685_s_at | PRKCB    | protein kinase C   | 0.21 | -2.27 | 0.00 | 0.00 |
| 207957_s_at | PRKCB    | protein kinase C   | 0.13 | -2.91 | 0.00 | 0.00 |



|             |         |                    |       |       |      |      |
|-------------|---------|--------------------|-------|-------|------|------|
| 213010_at   | PRKCDBP | protein kinase C   | 4.40  | 2.14  | 0.00 | 0.00 |
| 210038_at   | PRKCQ   | protein kinase C   | 5.19  | 2.38  | 0.00 | 0.00 |
| 211084_x_at | PRKD3   | protein kinase D   | 0.22  | -2.22 | 0.00 | 0.00 |
| 218236_s_at | PRKD3   | protein kinase D   | 0.17  | -2.55 | 0.00 | 0.00 |
| 210476_s_at | PRLR    | prolactin recepto  | 3.80  | 1.93  | 0.00 | 0.00 |
| 206445_s_at | PRMT1   | protein arginine i | 4.49  | 2.17  | 0.00 | 0.00 |
| 214203_s_at | PRODH   | proline dehydrog   | 0.20  | -2.36 | 0.00 | 0.00 |
| 220553_s_at | PRPF39  | PRP39 pre-mRN      | 0.12  | -3.02 | 0.00 | 0.00 |
| 214941_s_at | PRPF40A | PRP40 pre-mRN      | 6.22  | 2.64  | 0.00 | 0.00 |
| 202127_at   | PRPF4B  | PRP4 pre-mRN/      | 0.31  | -1.69 | 0.00 | 0.00 |
| 211090_s_at | PRPF4B  | PRP4 pre-mRN/      | 0.22  | -2.16 | 0.00 | 0.00 |
| 205402_x_at | PRSS2   | protease, serine,  | 5.87  | 2.55  | 0.00 | 0.00 |
| 202458_at   | PRSS23  | protease, serine,  | 11.77 | 3.56  | 0.00 | 0.00 |
| 200866_s_at | PSAP    | prosaposin         | 3.59  | 1.85  | 0.00 | 0.00 |
| 218613_at   | PSD3    | pleckstrin and St  | 0.29  | -1.80 | 0.01 | 0.01 |
| 205961_s_at | PSIP1   | PC4 and SFRS1      | 0.22  | -2.18 | 0.00 | 0.00 |
| 209337_at   | PSIP1   | PC4 and SFRS1      | 0.11  | -3.25 | 0.00 | 0.00 |
| 201274_at   | PSMA5   | proteasome (pro    | 4.12  | 2.04  | 0.00 | 0.00 |
| 202659_at   | PSMB10  | proteasome (pro    | 6.07  | 2.60  | 0.00 | 0.00 |
| 204279_at   | PSMB9   | proteasome (pro    | 4.94  | 2.30  | 0.00 | 0.00 |
| 209334_s_at | PSMD9   | proteasome (pro    | 3.60  | 1.85  | 0.00 | 0.00 |
| 209853_s_at | PSME3   | proteasome (pro    | 4.60  | 2.20  | 0.00 | 0.00 |
| 200987_x_at | PSME3   | proteasome (pro    | 3.89  | 1.96  | 0.00 | 0.00 |
| 205194_at   | PSPH    | phosphoserine p    | 0.31  | -1.68 | 0.00 | 0.00 |
| 205048_s_at | PSPH    | phosphoserine p    | 0.06  | -4.12 | 0.00 | 0.00 |
| 219658_at   | PTCD2   | pentatricopeptid   | 0.17  | -2.57 | 0.00 | 0.00 |
| 209815_at   | PTCH1   | patched homoloq    | 0.22  | -2.17 | 0.00 | 0.00 |
| 218967_s_at | PTER    | phosphotriester    | 0.17  | -2.58 | 0.00 | 0.00 |
| 214391_x_at | PTGER1  | prostaglandin E    | 8.15  | 3.03  | 0.00 | 0.00 |
| 207650_x_at | PTGER1  | prostaglandin E    | 4.37  | 2.13  | 0.00 | 0.00 |
| 211909_x_at | PTGER3  | prostaglandin E    | 0.26  | -1.93 | 0.00 | 0.00 |
| 210833_at   | PTGER3  | prostaglandin E    | 0.26  | -1.94 | 0.00 | 0.00 |
| 210834_s_at | PTGER3  | prostaglandin E    | 0.24  | -2.06 | 0.00 | 0.00 |
| 213933_at   | PTGER3  | prostaglandin E    | 0.21  | -2.25 | 0.00 | 0.00 |
| 210374_x_at | PTGER3  | prostaglandin E    | 0.16  | -2.63 | 0.00 | 0.00 |
| 210832_x_at | PTGER3  | prostaglandin E    | 0.12  | -3.07 | 0.00 | 0.00 |
| 210375_at   | PTGER3  | prostaglandin E    | 0.12  | -3.09 | 0.00 | 0.00 |
| 205128_x_at | PTGS1   | prostaglandin-en   | 0.29  | -1.78 | 0.00 | 0.00 |
| 205911_at   | PTH1R   | parathyroid horr   | 0.20  | -2.33 | 0.00 | 0.00 |
| 211756_at   | PTH1H   | parathyroid horr   | 17.89 | 4.16  | 0.00 | 0.00 |
| 206300_s_at | PTH1H   | parathyroid horr   | 6.37  | 2.67  | 0.00 | 0.00 |
| 210355_at   | PTH1H   | parathyroid horr   | 4.49  | 2.17  | 0.00 | 0.00 |
| 200772_x_at | PTMA    | prothymosin, alp   | 0.31  | -1.71 | 0.00 | 0.00 |
| 219654_at   | PTPLA   | protein tyrosine j | 4.75  | 2.25  | 0.00 | 0.00 |
| 204201_s_at | PTPN13  | protein tyrosine j | 0.16  | -2.69 | 0.00 | 0.00 |
| 203997_at   | PTPN3   | protein tyrosine j | 0.31  | -1.70 | 0.00 | 0.00 |
| 204960_at   | PTPRCAP | protein tyrosine j | 3.65  | 1.87  | 0.00 | 0.00 |
| 215066_at   | PTPRF   | protein tyrosine j | 0.18  | -2.49 | 0.00 | 0.00 |

|             |           |                    |       |       |      |      |
|-------------|-----------|--------------------|-------|-------|------|------|
| 204944_at   | PTPRG     | protein tyrosine p | 3.21  | 1.68  | 0.00 | 0.00 |
| 211320_s_at | PTPRU     | protein tyrosine p | 4.09  | 2.03  | 0.00 | 0.00 |
| 212012_at   | PXDN      | peroxidasin hom    | 14.13 | 3.82  | 0.00 | 0.00 |
| 212013_at   | PXDN      | peroxidasin hom    | 14.13 | 3.82  | 0.00 | 0.00 |
| 201087_at   | PXN       | paxillin           | 3.78  | 1.92  | 0.00 | 0.00 |
| 218944_at   | PYCRL     | pyrroline-5-carbc  | 4.02  | 2.01  | 0.00 | 0.00 |
| 202990_at   | PYGL      | phosphorylase, ζ   | 4.00  | 2.00  | 0.00 | 0.00 |
| 220209_at   | PYY2      | peptide YY, 2 (s   | 3.49  | 1.80  | 0.00 | 0.00 |
| 209123_at   | QDPR      | quinoid dihydrop   | 3.57  | 1.83  | 0.00 | 0.00 |
| 212263_at   | QKI       | quaking homolog    | 0.18  | -2.45 | 0.00 | 0.00 |
| 205174_s_at | QPCT      | glutaminy-peptic   | 0.30  | -1.72 | 0.00 | 0.00 |
| 201482_at   | QSOX1     | quiescin Q6 sulfi  | 3.78  | 1.92  | 0.00 | 0.00 |
| 200864_s_at | RAB11A    | RAB11A, membe      | 0.33  | -1.60 | 0.00 | 0.00 |
| 214999_s_at | RAB11FIP3 | RAB11 family int   | 0.16  | -2.63 | 0.00 | 0.00 |
| 200928_s_at | RAB14     | RAB14, member      | 0.33  | -1.62 | 0.00 | 0.00 |
| 211503_s_at | RAB14     | RAB14, member      | 0.31  | -1.69 | 0.00 | 0.00 |
| 219622_at   | RAB20     | RAB20, member      | 5.80  | 2.54  | 0.00 | 0.00 |
| 207018_s_at | RAB27B    | RAB27B, membe      | 0.32  | -1.64 | 0.00 | 0.00 |
| 208733_at   | RAB2A     | RAB2A, member      | 0.25  | -2.02 | 0.00 | 0.00 |
| 217764_s_at | RAB31     | RAB31, member      | 7.76  | 2.96  | 0.00 | 0.00 |
| 217763_s_at | RAB31     | RAB31, member      | 4.92  | 2.30  | 0.00 | 0.00 |
| 204214_s_at | RAB32     | RAB32, member      | 5.58  | 2.48  | 0.00 | 0.00 |
| 221014_s_at | RAB33B    | RAB33B, membe      | 0.13  | -2.95 | 0.00 | 0.00 |
| 217597_x_at | RAB40B    | RAB40B, membe      | 4.28  | 2.10  | 0.00 | 0.00 |
| 213466_at   | RAB40C    | RAB40C, memb       | 5.24  | 2.39  | 0.00 | 0.00 |
| 219210_s_at | RAB8B     | RAB8B, member      | 3.52  | 1.82  | 0.00 | 0.00 |
| 203136_at   | RABAC1    | Rab acceptor 1 (   | 3.27  | 1.71  | 0.00 | 0.00 |
| 203020_at   | RABGAP1L  | RAB GTPase ac      | 0.32  | -1.67 | 0.00 | 0.00 |
| 215342_s_at | RABGAP1L  | RAB GTPase ac      | 0.24  | -2.04 | 0.00 | 0.00 |
| 204478_s_at | RABIF     | RAB interacting    | 4.67  | 2.22  | 0.00 | 0.00 |
| 213603_s_at | RAC2      | ras-related C3 b   | 10.56 | 3.40  | 0.00 | 0.00 |
| 204146_at   | RAD51AP1  | RAD51 associati    | 0.20  | -2.33 | 0.00 | 0.00 |
| 205647_at   | RAD52     | RAD52 homolog      | 0.19  | -2.38 | 0.00 | 0.00 |
| 202052_s_at | RAI14     | retinoic acid ind  | 0.24  | -2.07 | 0.00 | 0.00 |
| 209051_s_at | RALGDS    | ral guanine nuck   | 3.27  | 1.71  | 0.00 | 0.00 |
| 209050_s_at | RALGDS    | ral guanine nuck   | 0.18  | -2.46 | 0.00 | 0.00 |
| 210552_s_at | RALGPS1   | Ral GEF with PI    | 0.28  | -1.84 | 0.00 | 0.00 |
| 204199_at   | RALGPS1   | Ral GEF with PI    | 0.15  | -2.78 | 0.00 | 0.00 |
| 220338_at   | RALGPS2   | Ral GEF with PI    | 0.22  | -2.21 | 0.00 | 0.00 |
| 202639_s_at | RANBP3    | RAN binding pro    | 3.80  | 1.92  | 0.00 | 0.00 |
| 202583_s_at | RANBP9    | RAN binding pro    | 0.29  | -1.81 | 0.00 | 0.00 |
| 212125_at   | RANGAP1   | Ran GTPase act     | 3.67  | 1.88  | 0.00 | 0.00 |
| 215992_s_at | RAPGEF2   | Rap guanine nuc    | 0.06  | -4.02 | 0.00 | 0.00 |
| 210051_at   | RAPGEF3   | Rap guanine nuc    | 3.52  | 1.82  | 0.00 | 0.00 |
| 205651_x_at | RAPGEF4   | Rap guanine nuc    | 0.12  | -3.01 | 0.00 | 0.00 |
| 219112_at   | RAPGEF6   | Rap guanine nuc    | 0.33  | -1.61 | 0.00 | 0.00 |
| 218657_at   | RAPGEFL1  | Rap guanine nuc    | 0.19  | -2.36 | 0.00 | 0.00 |
| 204189_at   | RARG      | retinoic acid rece | 3.21  | 1.68  | 0.00 | 0.00 |

|             |          |                        |        |       |      |      |
|-------------|----------|------------------------|--------|-------|------|------|
| 221872_at   | RARRES1  | retinoic acid rece     | 3.39   | 1.76  | 0.01 | 0.02 |
| 212706_at   | RASA4    | RAS p21 protein        | 0.13   | -2.94 | 0.00 | 0.00 |
| 214369_s_at | RASGRP2  | RAS guanyl rele        | 0.19   | -2.38 | 0.00 | 0.00 |
| 220027_s_at | RASIP1   | Ras interacting p      | 3.98   | 1.99  | 0.00 | 0.00 |
| 202033_s_at | RB1CC1   | RB1-inducible cc       | 0.29   | -1.78 | 0.00 | 0.00 |
| 202034_x_at | RB1CC1   | RB1-inducible cc       | 0.22   | -2.18 | 0.00 | 0.00 |
| 219222_at   | RBKS     | ribokinase             | 5.27   | 2.40  | 0.00 | 0.00 |
| 205296_at   | RBL1     | retinoblastoma-li      | 0.24   | -2.06 | 0.00 | 0.00 |
| 212332_at   | RBL2     | retinoblastoma-li      | 0.30   | -1.72 | 0.00 | 0.00 |
| 212331_at   | RBL2     | retinoblastoma-li      | 0.24   | -2.04 | 0.00 | 0.00 |
| 51228_at    | RBM12B   | RNA binding mo         | 0.20   | -2.33 | 0.00 | 0.00 |
| 212027_at   | RBM25    | RNA binding mo         | 0.32   | -1.64 | 0.00 | 0.00 |
| 219754_at   | RBM41    | RNA binding mo         | 0.24   | -2.04 | 0.00 | 0.00 |
| 209936_at   | RBM5     | RNA binding mo         | 0.32   | -1.64 | 0.00 | 0.00 |
| 217856_at   | RBM8A    | RNA binding mo         | 0.26   | -1.97 | 0.00 | 0.00 |
| 203423_at   | RBP1     | retinol binding pr     | 5.19   | 2.38  | 0.00 | 0.00 |
| 220201_at   | RC3H2    | ring finger and C      | 4.03   | 2.01  | 0.00 | 0.00 |
| 203498_at   | RCAN2    | regulator of calci     | 0.30   | -1.73 | 0.00 | 0.00 |
| 218352_at   | RCBTB1   | regulator of chro      | 0.18   | -2.47 | 0.00 | 0.00 |
| 205332_at   | RCE1     | RCE1 homolog,          | 3.32   | 1.73  | 0.00 | 0.00 |
| 206753_at   | RDH16    | retinol dehydrog       | 7.03   | 2.81  | 0.00 | 0.00 |
| 212917_x_at | RECQL    | RecQ protein-lik       | 0.30   | -1.72 | 0.00 | 0.00 |
| 205205_at   | RELB     | v-rel reticuloend      | 6.08   | 2.60  | 0.00 | 0.00 |
| 215201_at   | REPS1    | RALBP1 associ          | 0.11   | -3.18 | 0.00 | 0.00 |
| 214409_at   | RFPL3S   | RFPL3 antisense        | 0.25   | -1.98 | 0.00 | 0.00 |
| 212646_at   | RFTN1    | raftlin, lipid raft li | 4.71   | 2.24  | 0.00 | 0.00 |
| 218564_at   | RFWD3    | ring finger and V      | 0.27   | -1.88 | 0.00 | 0.00 |
| 218430_s_at | RFX7     | regulatory factor      | 0.27   | -1.91 | 0.00 | 0.00 |
| 216834_at   | RGS1     | regulator of G-pr      | 4.05   | 2.02  | 0.02 | 0.04 |
| 204316_at   | RGS10    | regulator of G-pr      | 5.73   | 2.52  | 0.00 | 0.00 |
| 202388_at   | RGS2     | regulator of G-pr      | 0.24   | -2.04 | 0.00 | 0.00 |
| 210138_at   | RGS20    | regulator of G-pr      | 4.30   | 2.10  | 0.00 | 0.00 |
| 203823_at   | RGS3     | regulator of G-pr      | 3.58   | 1.84  | 0.00 | 0.00 |
| 219554_at   | RHCG     | Rh family, C glyc      | 100.83 | 6.66  | 0.00 | 0.00 |
| 212651_at   | RHOBTB1  | Rho-related BTB        | 0.27   | -1.87 | 0.00 | 0.00 |
| 202975_s_at | RHOBTB3  | Rho-related BTB        | 0.18   | -2.52 | 0.00 | 0.00 |
| 202976_s_at | RHOBTB3  | Rho-related BTB        | 0.07   | -3.84 | 0.00 | 0.00 |
| 31846_at    | RHOD     | ras homolog gen        | 7.26   | 2.86  | 0.00 | 0.00 |
| 218323_at   | RHOT1    | ras homolog gen        | 0.18   | -2.50 | 0.00 | 0.00 |
| 222148_s_at | RHOT1    | ras homolog gen        | 0.17   | -2.53 | 0.00 | 0.00 |
| 205414_s_at | RICH2    | Rho-type GTPas         | 0.28   | -1.84 | 0.00 | 0.00 |
| 214700_x_at | RIF1     | RAP1 interactin        | 0.19   | -2.39 | 0.00 | 0.00 |
| 206137_at   | RIMS2    | regulating synap       | 3.31   | 1.73  | 0.00 | 0.00 |
| 218598_at   | RINT1    | RAD50 interacto        | 0.23   | -2.10 | 0.00 | 0.00 |
| 205158_at   | RNASE4   | ribonuclease, RN       | 0.33   | -1.62 | 0.00 | 0.00 |
| 213566_at   | RNASE6   | ribonuclease, RN       | 4.84   | 2.28  | 0.00 | 0.00 |
| 203022_at   | RNASEH2A | ribonuclease H2        | 4.83   | 2.27  | 0.00 | 0.00 |
| 210056_at   | RND1     | Rho family GTPe        | 5.20   | 2.38  | 0.00 | 0.00 |

|             |               |                     |       |       |      |      |
|-------------|---------------|---------------------|-------|-------|------|------|
| 200868_s_at | RNF114        | ring finger protei  | 4.25  | 2.09  | 0.00 | 0.00 |
| 221063_x_at | RNF123        | ring finger protei  | 3.85  | 1.94  | 0.00 | 0.00 |
| 207735_at   | RNF125        | ring finger protei  | 0.08  | -3.65 | 0.00 | 0.00 |
| 219263_at   | RNF128        | ring finger protei  | 0.26  | -1.93 | 0.02 | 0.03 |
| 219104_at   | RNF141        | ring finger protei  | 3.11  | 1.64  | 0.00 | 0.00 |
| 220985_s_at | RNF170        | ring finger protei  | 0.19  | -2.41 | 0.00 | 0.00 |
| 211387_x_at | RNGTT         | RNA guanylyltra     | 0.28  | -1.82 | 0.00 | 0.00 |
| 214697_s_at | ROD1          | ROD1 regulator      | 3.10  | 1.63  | 0.02 | 0.03 |
| 218394_at   | ROGDI         | rogdi homolog (L    | 7.61  | 2.93  | 0.00 | 0.00 |
| 210479_s_at | RORA          | RAR-related orp     | 0.09  | -3.46 | 0.00 | 0.00 |
| 210426_x_at | RORA          | RAR-related orp     | 0.09  | -3.48 | 0.00 | 0.00 |
| 220436_at   | RP11-138L21.1 | similar to cell rec | 0.21  | -2.23 | 0.00 | 0.00 |
| 205191_at   | RP2           | retinitis pigmentc  | 0.13  | -2.90 | 0.00 | 0.00 |
| 218499_at   | RP6-213H19.1  | serine/threonine    | 0.28  | -1.83 | 0.00 | 0.00 |
| 207624_s_at | RPGR          | retinitis pigmentc  | 0.23  | -2.14 | 0.00 | 0.00 |
| 213959_s_at | RPGRIP1L      | RPGRIP1-like        | 0.32  | -1.65 | 0.00 | 0.00 |
| 213223_at   | RPL28         | ribosomal protei    | 3.88  | 1.96  | 0.00 | 0.00 |
| 214041_x_at | RPL37A        | ribosomal protei    | 0.25  | -2.02 | 0.01 | 0.01 |
| 221943_x_at | RPL38         | ribosomal protei    | 0.30  | -1.72 | 0.00 | 0.00 |
| 219143_s_at | RPP25         | ribonuclease P/l    | 3.26  | 1.70  | 0.00 | 0.00 |
| 217723_x_at | RPS12         | ribosomal protei    | 4.01  | 2.01  | 0.00 | 0.00 |
| 203379_at   | RPS6KA1       | ribosomal protei    | 3.01  | 1.59  | 0.00 | 0.00 |
| 204632_at   | RPS6KA4       | ribosomal protei    | 3.53  | 1.82  | 0.00 | 0.00 |
| 204633_s_at | RPS6KA5       | ribosomal protei    | 0.28  | -1.86 | 0.00 | 0.00 |
| 204635_at   | RPS6KA5       | ribosomal protei    | 0.24  | -2.09 | 0.00 | 0.00 |
| 213098_at   | RQCD1         | RCD1 required f     | 3.56  | 1.83  | 0.00 | 0.00 |
| 221524_s_at | RRAGD         | Ras-related GTF     | 0.21  | -2.25 | 0.00 | 0.00 |
| 221523_s_at | RRAGD         | Ras-related GTF     | 0.12  | -3.01 | 0.00 | 0.00 |
| 212590_at   | RRAS2         | related RAS vira    | 11.77 | 3.56  | 0.00 | 0.00 |
| 212589_at   | RRAS2         | related RAS vira    | 3.33  | 1.73  | 0.00 | 0.00 |
| 201206_s_at | RRBP1         | ribosome binding    | 6.52  | 2.71  | 0.00 | 0.00 |
| 218758_s_at | RRP1          | ribosomal RNA r     | 4.00  | 2.00  | 0.00 | 0.00 |
| 214764_at   | RRP15         | ribosomal RNA r     | 0.22  | -2.16 | 0.00 | 0.00 |
| 33307_at    | RRP7A         | ribosomal RNA r     | 3.17  | 1.67  | 0.00 | 0.00 |
| 213694_at   | RSBN1         | round spermatid     | 0.33  | -1.59 | 0.00 | 0.00 |
| 218166_s_at | RSF1          | remodeling and :    | 0.23  | -2.11 | 0.00 | 0.00 |
| 203485_at   | RTN1          | reticulon 1         | 0.21  | -2.23 | 0.00 | 0.00 |
| 210222_s_at | RTN1          | reticulon 1         | 0.18  | -2.52 | 0.00 | 0.00 |
| 34408_at    | RTN2          | reticulon 2         | 3.19  | 1.67  | 0.00 | 0.00 |
| 219684_at   | RTP4          | receptor (chemo     | 6.90  | 2.79  | 0.00 | 0.00 |
| 210251_s_at | RUFY3         | RUN and FYVE        | 0.22  | -2.22 | 0.00 | 0.00 |
| 213430_at   | RUFY3         | RUN and FYVE        | 0.16  | -2.62 | 0.00 | 0.00 |
| 203724_s_at | RUFY3         | RUN and FYVE        | 0.12  | -3.05 | 0.00 | 0.00 |
| 213939_s_at | RUFY3         | RUN and FYVE        | 0.09  | -3.44 | 0.00 | 0.00 |
| 215321_at   | RUND3B        | RUN domain cor      | 0.11  | -3.16 | 0.00 | 0.00 |
| 209360_s_at | RUNX1         | runt-related trans  | 24.26 | 4.60  | 0.00 | 0.00 |
| 200660_at   | S100A11       | S100 calcium bir    | 3.40  | 1.77  | 0.00 | 0.00 |
| 205863_at   | S100A12       | S100 calcium bir    | 71.58 | 6.16  | 0.00 | 0.00 |

|             |           |                    |        |       |      |      |
|-------------|-----------|--------------------|--------|-------|------|------|
| 202598_at   | S100A13   | S100 calcium bir   | 3.13   | 1.65  | 0.00 | 0.00 |
| 204268_at   | S100A2    | S100 calcium bir   | 6.70   | 2.75  | 0.00 | 0.00 |
| 206027_at   | S100A3    | S100 calcium bir   | 6.42   | 2.68  | 0.00 | 0.00 |
| 217728_at   | S100A6    | S100 calcium bir   | 6.35   | 2.67  | 0.00 | 0.00 |
| 205916_at   | S100A7    | S100 calcium bir   | 90.38  | 6.50  | 0.00 | 0.00 |
| 202917_s_at | S100A8    | S100 calcium bir   | 197.39 | 7.63  | 0.00 | 0.00 |
| 214370_at   | S100A8    | S100 calcium bir   | 6.48   | 2.70  | 0.00 | 0.00 |
| 203535_at   | S100A9    | S100 calcium bir   | 803.72 | 9.65  | 0.00 | 0.00 |
| 204351_at   | S100P     | S100 calcium bir   | 33.19  | 5.05  | 0.00 | 0.00 |
| 204642_at   | S1PR1     | sphingosine-1-pl   | 0.31   | -1.69 | 0.00 | 0.00 |
| 213635_s_at | SAFB      | scaffold attachm   | 0.31   | -1.70 | 0.00 | 0.00 |
| 213283_s_at | SALL2     | sal-like 2 (Droso  | 0.30   | -1.76 | 0.00 | 0.00 |
| 219691_at   | SAMD9     | sterile alpha mot  | 3.68   | 1.88  | 0.00 | 0.00 |
| 204900_x_at | SAP30     | Sin3A-associate    | 0.30   | -1.72 | 0.00 | 0.00 |
| 201543_s_at | SAR1A     | SAR1 homolog /     | 3.59   | 1.84  | 0.00 | 0.00 |
| 213257_at   | SARM1     | sterile alpha and  | 0.31   | -1.68 | 0.00 | 0.00 |
| 214997_at   | SCAI      | suppressor of ca   | 0.31   | -1.69 | 0.00 | 0.00 |
| 212417_at   | SCAMP1    | secretory carrier  | 0.30   | -1.76 | 0.00 | 0.00 |
| 215754_at   | SCARB2    | scavenger recep    | 0.27   | -1.90 | 0.00 | 0.00 |
| 206995_x_at | SCARF1    | scavenger recep    | 0.31   | -1.67 | 0.00 | 0.00 |
| 201826_s_at | SCCPDH    | saccharopine de    | 0.26   | -1.96 | 0.00 | 0.00 |
| 200831_s_at | SCD       | stearoyl-CoA de:   | 5.44   | 2.44  | 0.00 | 0.00 |
| 211708_s_at | SCD       | stearoyl-CoA de:   | 4.13   | 2.05  | 0.00 | 0.00 |
| 206884_s_at | SCEL      | sciellin           | 0.12   | -3.12 | 0.00 | 0.00 |
| 215548_s_at | SCFD1     | sec1 family dom    | 0.30   | -1.73 | 0.00 | 0.00 |
| 203889_at   | SCG5      | secretogranin V    | 6.19   | 2.63  | 0.00 | 0.00 |
| 204030_s_at | SCHIP1    | schwannomin inl    | 3.12   | 1.64  | 0.00 | 0.00 |
| 218793_s_at | SCML1     | sex comb on mic    | 0.15   | -2.77 | 0.00 | 0.00 |
| 215026_x_at | SCNN1A    | sodium channel,    | 3.85   | 1.95  | 0.00 | 0.00 |
| 205241_at   | SCO2      | SCO cytochrom      | 5.92   | 2.57  | 0.00 | 0.00 |
| 219197_s_at | SCUBE2    | signal peptide, C  | 0.25   | -1.97 | 0.00 | 0.00 |
| 218681_s_at | SDF2L1    | stromal cell-deriv | 3.43   | 1.78  | 0.00 | 0.00 |
| 205695_at   | SDS       | serine dehydrata   | 4.60   | 2.20  | 0.00 | 0.00 |
| 204541_at   | SEC14L2   | SEC14-like 2 (S.   | 4.36   | 2.12  | 0.00 | 0.00 |
| 215009_s_at | SEC31A    | SEC31 homolog      | 0.27   | -1.92 | 0.00 | 0.00 |
| 212450_at   | SECISBP2L | SECIS binding p    | 0.20   | -2.32 | 0.00 | 0.00 |
| 213716_s_at | SECTM1    | secreted and tra   | 4.50   | 2.17  | 0.00 | 0.00 |
| 209880_s_at | SELPLG    | selectin P ligand  | 4.07   | 2.02  | 0.00 | 0.00 |
| 203789_s_at | SEMA3C    | sema domain, in    | 3.90   | 1.96  | 0.01 | 0.01 |
| 203528_at   | SEMA4D    | sema domain, in    | 0.32   | -1.64 | 0.00 | 0.00 |
| 208100_x_at | SEMA6C    | sema domain, tr    | 4.42   | 2.14  | 0.00 | 0.00 |
| 218122_s_at | SENP2     | SUMO1/sentrin/     | 4.70   | 2.23  | 0.00 | 0.00 |
| 215114_at   | SENP3     | SUMO1/sentrin/     | 0.29   | -1.80 | 0.00 | 0.00 |
| 202319_at   | SENP6     | SUMO1/sentrin :    | 0.24   | -2.06 | 0.00 | 0.00 |
| 214790_at   | SENP6     | SUMO1/sentrin :    | 0.08   | -3.70 | 0.00 | 0.00 |
| 217977_at   | SEPX1     | selenoprotein X,   | 3.32   | 1.73  | 0.00 | 0.00 |
| 210076_x_at | SERBP1    | SERPINE1 mRN       | 3.40   | 1.77  | 0.00 | 0.00 |
| 200971_s_at | SERP1     | stress-associate   | 3.18   | 1.67  | 0.00 | 0.00 |

|             |           |                    |        |       |      |      |
|-------------|-----------|--------------------|--------|-------|------|------|
| 202376_at   | SERPINA3  | serpin peptidase   | 66.07  | 6.05  | 0.00 | 0.00 |
| 212268_at   | SERPINB1  | serpin peptidase   | 10.29  | 3.36  | 0.00 | 0.00 |
| 213572_s_at | SERPINB1  | serpin peptidase   | 8.08   | 3.02  | 0.00 | 0.00 |
| 209719_x_at | SERPINB3  | serpin peptidase   | 51.63  | 5.69  | 0.00 | 0.00 |
| 209720_s_at | SERPINB3  | serpin peptidase   | 32.54  | 5.02  | 0.00 | 0.00 |
| 211906_s_at | SERPINB4  | serpin peptidase   | 107.54 | 6.75  | 0.00 | 0.00 |
| 209723_at   | SERPINB9  | serpin peptidase   | 5.39   | 2.43  | 0.00 | 0.00 |
| 202628_s_at | SERPINE1  | serpin peptidase   | 10.42  | 3.38  | 0.00 | 0.00 |
| 202627_s_at | SERPINE1  | serpin peptidase   | 6.45   | 2.69  | 0.00 | 0.00 |
| 212190_at   | SERPINE2  | serpin peptidase   | 25.61  | 4.68  | 0.00 | 0.00 |
| 200986_at   | SERPING1  | serpin peptidase   | 5.35   | 2.42  | 0.00 | 0.00 |
| 207714_s_at | SERPINH1  | serpin peptidase   | 5.10   | 2.35  | 0.00 | 0.00 |
| 218346_s_at | SESN1     | sestrin 1          | 0.26   | -1.94 | 0.00 | 0.00 |
| 220946_s_at | SETD2     | SET domain con     | 0.28   | -1.83 | 0.00 | 0.00 |
| 215038_s_at | SETD2     | SET domain con     | 0.23   | -2.14 | 0.00 | 0.00 |
| 221806_s_at | SETD5     | SET domain con     | 0.32   | -1.66 | 0.00 | 0.00 |
| 219751_at   | SETD6     | SET domain con     | 0.33   | -1.62 | 0.00 | 0.00 |
| 216047_x_at | SEZ6L     | seizure related 6  | 3.52   | 1.82  | 0.00 | 0.00 |
| 210172_at   | SF1       | splicing factor 1  | 0.23   | -2.10 | 0.00 | 0.00 |
| 221768_at   | SFPQ      | splicing factor pr | 0.27   | -1.88 | 0.00 | 0.00 |
| 214016_s_at | SFPQ      | splicing factor pr | 0.27   | -1.91 | 0.00 | 0.00 |
| 202037_s_at | SFRP1     | secreted frizzled  | 5.07   | 2.34  | 0.00 | 0.00 |
| 202036_s_at | SFRP1     | secreted frizzled  | 4.67   | 2.22  | 0.00 | 0.00 |
| 207468_s_at | SFRP5     | secreted frizzled  | 3.68   | 1.88  | 0.00 | 0.00 |
| 208863_s_at | SFRS1     | splicing factor, a | 0.26   | -1.96 | 0.00 | 0.00 |
| 213742_at   | SFRS11    | splicing factor, a | 0.23   | -2.12 | 0.00 | 0.00 |
| 217608_at   | SFRS12IP1 | SFRS12-interact    | 0.13   | -2.91 | 0.00 | 0.00 |
| 222311_s_at | SFRS15    | splicing factor, a | 0.27   | -1.89 | 0.00 | 0.00 |
| 222310_at   | SFRS15    | splicing factor, a | 0.13   | -2.99 | 0.00 | 0.00 |
| 212179_at   | SFRS18    | splicing factor, a | 0.24   | -2.08 | 0.00 | 0.00 |
| 202774_s_at | SFRS8     | splicing factor, a | 0.27   | -1.90 | 0.00 | 0.00 |
| 214838_at   | SFT2D2    | SFT2 domain co     | 3.69   | 1.89  | 0.00 | 0.00 |
| 211735_x_at | SFTPC     | surfactant protei  | 3.17   | 1.66  | 0.00 | 0.00 |
| 214199_at   | SFTPD     | surfactant protei  | 0.21   | -2.24 | 0.00 | 0.00 |
| 207302_at   | SGCG      | sarcoglycan, gar   | 0.30   | -1.74 | 0.00 | 0.00 |
| 217538_at   | SGSM2     | small G protein ε  | 0.26   | -1.96 | 0.00 | 0.00 |
| 207351_s_at | SH2D2A    | SH2 domain pro     | 5.12   | 2.36  | 0.00 | 0.00 |
| 221269_s_at | SH3BGRL3  | SH3 domain bin     | 4.94   | 2.30  | 0.00 | 0.00 |
| 217257_at   | SH3BP2    | SH3-domain bin     | 0.11   | -3.14 | 0.00 | 0.00 |
| 205637_s_at | SH3GL3    | SH3-domain GR      | 7.95   | 2.99  | 0.00 | 0.00 |
| 219256_s_at | SH3TC1    | SH3 domain anc     | 4.38   | 2.13  | 0.00 | 0.00 |
| 204019_s_at | SH3YL1    | SH3 domain con     | 0.24   | -2.08 | 0.00 | 0.00 |
| 204657_s_at | SHB       | Src homology 2     | 4.29   | 2.10  | 0.00 | 0.00 |
| 204967_at   | SHROOM2   | shroom family m    | 4.09   | 2.03  | 0.00 | 0.00 |
| 216537_s_at | SIGLEC7   | sialic acid bindin | 4.27   | 2.09  | 0.00 | 0.00 |
| 213221_s_at | SIK2      | salt-inducible kin | 0.25   | -1.99 | 0.00 | 0.00 |
| 221705_s_at | SIKE1     | suppressor of IK   | 0.18   | -2.47 | 0.00 | 0.00 |
| 205063_at   | SIP1      | survival of motor  | 0.19   | -2.43 | 0.00 | 0.00 |

|             |          |                    |       |       |      |      |
|-------------|----------|--------------------|-------|-------|------|------|
| 202254_at   | SIPA1L1  | signal-induced p   | 0.32  | -1.64 | 0.00 | 0.00 |
| 37831_at    | SIPA1L3  | signal-induced p   | 5.06  | 2.34  | 0.00 | 0.00 |
| 202897_at   | SIRPA    | signal-regulatory  | 4.20  | 2.07  | 0.00 | 0.00 |
| 202896_s_at | SIRPA    | signal-regulatory  | 3.23  | 1.69  | 0.00 | 0.00 |
| 218878_s_at | SIRT1    | sirtuin (silent ma | 0.23  | -2.15 | 0.00 | 0.00 |
| 49327_at    | SIRT3    | sirtuin (silent ma | 6.52  | 2.71  | 0.00 | 0.00 |
| 220047_at   | SIRT4    | sirtuin (silent ma | 0.25  | -2.03 | 0.00 | 0.00 |
| 219613_s_at | SIRT6    | sirtuin (silent ma | 4.17  | 2.06  | 0.00 | 0.00 |
| 219874_at   | SLC12A8  | solute carrier fan | 10.07 | 3.33  | 0.00 | 0.00 |
| 205243_at   | SLC13A3  | solute carrier fan | 6.38  | 2.67  | 0.00 | 0.00 |
| 202234_s_at | SLC16A1  | solute carrier fan | 7.74  | 2.95  | 0.00 | 0.00 |
| 209900_s_at | SLC16A1  | solute carrier fan | 6.36  | 2.67  | 0.00 | 0.00 |
| 202235_at   | SLC16A1  | solute carrier fan | 5.21  | 2.38  | 0.00 | 0.00 |
| 202236_s_at | SLC16A1  | solute carrier fan | 3.51  | 1.81  | 0.00 | 0.00 |
| 219915_s_at | SLC16A10 | solute carrier fan | 0.09  | -3.45 | 0.00 | 0.00 |
| 210807_s_at | SLC16A7  | solute carrier fan | 0.23  | -2.12 | 0.00 | 0.00 |
| 207057_at   | SLC16A7  | solute carrier fan | 0.03  | -5.20 | 0.00 | 0.00 |
| 209681_at   | SLC19A2  | solute carrier fan | 0.23  | -2.15 | 0.00 | 0.00 |
| 205421_at   | SLC22A3  | solute carrier fan | 0.32  | -1.63 | 0.00 | 0.00 |
| 205896_at   | SLC22A4  | solute carrier fan | 3.43  | 1.78  | 0.00 | 0.00 |
| 209237_s_at | SLC23A2  | solute carrier fan | 3.84  | 1.94  | 0.00 | 0.00 |
| 201918_at   | SLC25A36 | solute carrier fan | 0.26  | -1.97 | 0.00 | 0.00 |
| 212683_at   | SLC25A44 | solute carrier fan | 0.29  | -1.81 | 0.00 | 0.00 |
| 219344_at   | SLC29A3  | solute carrier fan | 5.83  | 2.54  | 0.00 | 0.00 |
| 201249_at   | SLC2A1   | solute carrier fan | 10.12 | 3.34  | 0.00 | 0.00 |
| 221751_at   | SLC2A3P1 | solute carrier fan | 0.22  | -2.16 | 0.00 | 0.00 |
| 218985_at   | SLC2A8   | solute carrier fan | 3.35  | 1.74  | 0.00 | 0.00 |
| 219991_at   | SLC2A9   | solute carrier fan | 12.67 | 3.66  | 0.00 | 0.00 |
| 207035_at   | SLC30A3  | solute carrier fan | 6.61  | 2.72  | 0.00 | 0.00 |
| 206770_s_at | SLC35A3  | solute carrier fan | 0.31  | -1.69 | 0.00 | 0.00 |
| 209865_at   | SLC35A3  | solute carrier fan | 0.24  | -2.07 | 0.00 | 0.00 |
| 218485_s_at | SLC35C1  | solute carrier fan | 3.87  | 1.95  | 0.00 | 0.00 |
| 213083_at   | SLC35D2  | solute carrier fan | 3.24  | 1.69  | 0.00 | 0.00 |
| 218928_s_at | SLC37A1  | solute carrier fan | 0.26  | -1.96 | 0.00 | 0.00 |
| 212110_at   | SLC39A14 | solute carrier fan | 3.23  | 1.69  | 0.00 | 0.00 |
| 219175_s_at | SLC41A3  | solute carrier fan | 4.46  | 2.16  | 0.00 | 0.00 |
| 204394_at   | SLC43A1  | solute carrier fan | 0.33  | -1.61 | 0.00 | 0.00 |
| 222364_at   | SLC44A1  | solute carrier fan | 0.15  | -2.79 | 0.00 | 0.00 |
| 219525_at   | SLC47A1  | solute carrier fan | 0.04  | -4.53 | 0.00 | 0.00 |
| 207771_at   | SLC5A2   | solute carrier fan | 3.37  | 1.75  | 0.00 | 0.00 |
| 213164_at   | SLC5A3   | solute carrier fan | 0.29  | -1.76 | 0.00 | 0.00 |
| 211123_at   | SLC5A5   | solute carrier fan | 4.50  | 2.17  | 0.00 | 0.00 |
| 204087_s_at | SLC5A6   | solute carrier fan | 3.59  | 1.84  | 0.00 | 0.00 |
| 201195_s_at | SLC7A5   | solute carrier fan | 3.09  | 1.63  | 0.00 | 0.00 |
| 216604_s_at | SLC7A8   | solute carrier fan | 4.31  | 2.11  | 0.00 | 0.00 |
| 202752_x_at | SLC7A8   | solute carrier fan | 3.69  | 1.88  | 0.00 | 0.00 |
| 208015_at   | SMAD1    | SMAD family me     | 0.13  | -2.98 | 0.00 | 0.00 |
| 205398_s_at | SMAD3    | SMAD family me     | 4.48  | 2.16  | 0.00 | 0.00 |

|             |          |                     |       |       |      |      |
|-------------|----------|---------------------|-------|-------|------|------|
| 202527_s_at | SMAD4    | SMAD family me      | 0.24  | -2.04 | 0.00 | 0.00 |
| 205187_at   | SMAD5    | SMAD family me      | 0.05  | -4.21 | 0.00 | 0.00 |
| 206544_x_at | SMARCA2  | SWI/SNF relatec     | 0.33  | -1.60 | 0.00 | 0.00 |
| 206542_s_at | SMARCA2  | SWI/SNF relatec     | 0.12  | -3.05 | 0.00 | 0.00 |
| 208793_x_at | SMARCA4  | SWI/SNF relatec     | 3.76  | 1.91  | 0.00 | 0.00 |
| 201321_s_at | SMARCC2  | SWI/SNF relatec     | 0.32  | -1.63 | 0.00 | 0.00 |
| 209257_s_at | SMC3     | structural mainte   | 0.30  | -1.76 | 0.00 | 0.00 |
| 212569_at   | SMCHD1   | structural mainte   | 0.32  | -1.65 | 0.00 | 0.00 |
| 212579_at   | SMCHD1   | structural mainte   | 0.16  | -2.66 | 0.00 | 0.00 |
| 220368_s_at | SMEK1    | SMEK homolog        | 0.14  | -2.85 | 0.00 | 0.00 |
| 222270_at   | SMEK2    | SMEK homolog        | 0.13  | -3.00 | 0.00 | 0.00 |
| 210057_at   | SMG1     | SMG1 homolog,       | 0.07  | -3.77 | 0.00 | 0.00 |
| 219695_at   | SMPD3    | sphingomyelin p     | 4.22  | 2.08  | 0.00 | 0.00 |
| 213624_at   | SMPDL3A  | sphingomyelin p     | 0.16  | -2.68 | 0.00 | 0.00 |
| 212921_at   | SMYD2    | SET and MYND        | 0.21  | -2.25 | 0.00 | 0.00 |
| 204104_at   | SNAPC2   | small nuclear RN    | 3.82  | 1.93  | 0.00 | 0.00 |
| 222286_at   | SNAPC3   | small nuclear RN    | 0.15  | -2.73 | 0.00 | 0.00 |
| 209481_at   | SNRK     | SNF related kina    | 0.19  | -2.43 | 0.00 | 0.00 |
| 207474_at   | SNRK     | SNF related kina    | 0.16  | -2.64 | 0.00 | 0.00 |
| 218404_at   | SNX10    | sorting nexin 10    | 3.13  | 1.65  | 0.01 | 0.02 |
| 53912_at    | SNX11    | sorting nexin 11    | 4.33  | 2.11  | 0.00 | 0.00 |
| 220140_s_at | SNX11    | sorting nexin 11    | 3.68  | 1.88  | 0.00 | 0.00 |
| 219793_at   | SNX16    | sorting nexin 16    | 0.17  | -2.55 | 0.00 | 0.00 |
| 221498_at   | SNX27    | sorting nexin fan   | 0.25  | -2.03 | 0.00 | 0.00 |
| 203373_at   | SOCS2    | suppressor of cy    | 5.04  | 2.33  | 0.00 | 0.00 |
| 215223_s_at | SOD2     | superoxide dism     | 3.21  | 1.68  | 0.00 | 0.00 |
| 204275_at   | SOLH     | small optic lobes   | 0.30  | -1.72 | 0.00 | 0.00 |
| 218087_s_at | SORBS1   | sorbin and SH3 r    | 0.05  | -4.31 | 0.00 | 0.00 |
| 212560_at   | SORL1    | sortilin-related re | 3.19  | 1.67  | 0.00 | 0.00 |
| 212807_s_at | SORT1    | sortilin 1          | 3.41  | 1.77  | 0.00 | 0.00 |
| 209843_s_at | SOX10    | SRY (sex determ     | 3.31  | 1.73  | 0.00 | 0.00 |
| 201416_at   | SOX4     | SRY (sex determ     | 3.33  | 1.74  | 0.00 | 0.00 |
| 202936_s_at | SOX9     | SRY (sex determ     | 10.33 | 3.37  | 0.00 | 0.00 |
| 202935_s_at | SOX9     | SRY (sex determ     | 4.30  | 2.11  | 0.00 | 0.00 |
| 208012_x_at | SP110    | SP110 nuclear b     | 4.72  | 2.24  | 0.00 | 0.00 |
| 214791_at   | SP140L   | SP140 nuclear b     | 4.80  | 2.26  | 0.00 | 0.00 |
| 213168_at   | SP3      | Sp3 transcription   | 0.27  | -1.90 | 0.00 | 0.00 |
| 210117_at   | SPAG1    | sperm associate     | 0.31  | -1.68 | 0.01 | 0.01 |
| 219109_at   | SPAG16   | sperm associate     | 0.29  | -1.80 | 0.00 | 0.00 |
| 200665_s_at | SPARC    | secreted protein,   | 5.74  | 2.52  | 0.00 | 0.00 |
| 204433_s_at | SPATA2   | spermatogenesis:    | 3.67  | 1.88  | 0.00 | 0.00 |
| 215694_at   | SPATA5L1 | spermatogenesis:    | 0.28  | -1.85 | 0.00 | 0.00 |
| 220298_s_at | SPATA6   | spermatogenesis:    | 0.19  | -2.40 | 0.00 | 0.00 |
| 219583_s_at | SPATA7   | spermatogenesis:    | 0.15  | -2.70 | 0.00 | 0.00 |
| 213442_x_at | SPDEF    | SAM pointed dor     | 7.40  | 2.89  | 0.00 | 0.00 |
| 213441_x_at | SPDEF    | SAM pointed dor     | 6.49  | 2.70  | 0.00 | 0.00 |
| 220192_x_at | SPDEF    | SAM pointed dor     | 5.50  | 2.46  | 0.00 | 0.00 |
| 214404_x_at | SPDEF    | SAM pointed dor     | 4.44  | 2.15  | 0.00 | 0.00 |



|             |         |                    |       |       |      |      |
|-------------|---------|--------------------|-------|-------|------|------|
| 212526_at   | SPG20   | spastic parapleg   | 0.18  | -2.48 | 0.00 | 0.00 |
| 209857_s_at | SPHK2   | sphingosine kina   | 3.35  | 1.74  | 0.00 | 0.00 |
| 217813_s_at | SPIN1   | spindlin 1         | 0.21  | -2.25 | 0.00 | 0.00 |
| 206239_s_at | SPINK1  | serine peptidase   | 0.18  | -2.51 | 0.00 | 0.00 |
| 206057_x_at | SPN     | sialophorin        | 3.75  | 1.91  | 0.00 | 0.00 |
| 202523_s_at | SPOCK2  | sparc/osteonecti   | 4.89  | 2.29  | 0.00 | 0.00 |
| 208927_at   | SPOP    | speckle-type PO    | 0.32  | -1.65 | 0.00 | 0.00 |
| 209875_s_at | SPP1    | secreted phosph    | 8.76  | 3.13  | 0.00 | 0.00 |
| 203458_at   | SPR     | sepiapterin redu   | 7.82  | 2.97  | 0.00 | 0.00 |
| 214549_x_at | SPRR1A  | small proline-ric  | 31.23 | 4.97  | 0.00 | 0.00 |
| 213796_at   | SPRR1A  | small proline-ric  | 18.08 | 4.18  | 0.00 | 0.00 |
| 220664_at   | SPRR2C  | small proline-ric  | 9.43  | 3.24  | 0.00 | 0.00 |
| 218990_s_at | SPRR3   | small proline-ric  | 9.21  | 3.20  | 0.00 | 0.00 |
| 212558_at   | SPRY1   | sprouty homolog    | 0.21  | -2.27 | 0.00 | 0.00 |
| 221489_s_at | SPRY4   | sprouty homolog    | 5.99  | 2.58  | 0.00 | 0.00 |
| 214925_s_at | SPTAN1  | spectrin, alpha, r | 0.13  | -3.00 | 0.00 | 0.00 |
| 214145_s_at | SPTB    | spectrin, beta, er | 3.18  | 1.67  | 0.00 | 0.00 |
| 220185_at   | SPTBN4  | spectrin, beta, nr | 4.89  | 2.29  | 0.00 | 0.00 |
| 220456_at   | SPTLC3  | serine palmitoylt  | 0.11  | -3.17 | 0.00 | 0.00 |
| 217995_at   | SQRDL   | sulfide quinone r  | 3.60  | 1.85  | 0.00 | 0.00 |
| 212061_at   | SR140   | U2-associated S    | 0.25  | -2.00 | 0.00 | 0.00 |
| 38766_at    | SRCAP   | Snf2-related CRI   | 4.09  | 2.03  | 0.00 | 0.00 |
| 210959_s_at | SRD5A1  | steroid-5-alpha-r  | 3.26  | 1.71  | 0.00 | 0.00 |
| 218800_at   | SRD5A3  | steroid 5 alpha-r  | 0.26  | -1.96 | 0.00 | 0.00 |
| 201248_s_at | SREBF2  | sterol regulatory  | 3.02  | 1.59  | 0.00 | 0.00 |
| 213329_at   | SRGAP2  | SLIT-ROBO Rho      | 0.12  | -3.03 | 0.00 | 0.00 |
| 201859_at   | SRGN    | serglycin          | 12.12 | 3.60  | 0.00 | 0.00 |
| 208921_s_at | SRI     | sorcini            | 3.46  | 1.79  | 0.00 | 0.00 |
| 219205_at   | SRR     | serine racemase    | 3.11  | 1.64  | 0.00 | 0.00 |
| 202817_s_at | SS18    | synovial sarcoma   | 0.21  | -2.27 | 0.00 | 0.00 |
| 201138_s_at | SSB     | Sjogren syndrom    | 0.33  | -1.60 | 0.00 | 0.00 |
| 202506_at   | SSFA2   | sperm specific a   | 0.32  | -1.63 | 0.00 | 0.00 |
| 219241_x_at | SSH3    | slingshot homolo   | 3.55  | 1.83  | 0.00 | 0.00 |
| 203114_at   | SSSCA1  | Sjogren syndrom    | 5.03  | 2.33  | 0.00 | 0.00 |
| 217650_x_at | ST3GAL2 | ST3 beta-galact    | 0.30  | -1.75 | 0.00 | 0.00 |
| 202440_s_at | ST5     | suppression of t   | 5.13  | 2.36  | 0.00 | 0.00 |
| 38487_at    | STAB1   | stabilin 1         | 3.05  | 1.61  | 0.00 | 0.00 |
| 209023_s_at | STAG2   | stromal antigen ;  | 0.17  | -2.60 | 0.00 | 0.00 |
| 221191_at   | STAG3L1 | stromal antigen ;  | 0.25  | -2.02 | 0.00 | 0.00 |
| 204548_at   | STAR    | steroidogenic ac   | 0.23  | -2.11 | 0.00 | 0.00 |
| 200887_s_at | STAT1   | signal transduce   | 3.84  | 1.94  | 0.00 | 0.00 |
| 208992_s_at | STAT3   | signal transduce   | 5.98  | 2.58  | 0.00 | 0.00 |
| 208991_at   | STAT3   | signal transduce   | 3.45  | 1.79  | 0.00 | 0.00 |
| 218424_s_at | STEAP3  | STEAP family m     | 4.10  | 2.04  | 0.00 | 0.00 |
| 41657_at    | STK11   | serine/threonine   | 6.33  | 2.66  | 0.00 | 0.00 |
| 202693_s_at | STK17A  | serine/threonine   | 3.20  | 1.68  | 0.00 | 0.00 |
| 211085_s_at | STK4    | serine/threonine   | 0.27  | -1.87 | 0.00 | 0.00 |
| 204701_s_at | STOML1  | stomatin (EPB72    | 3.59  | 1.84  | 0.00 | 0.00 |

|             |         |                    |       |       |      |      |
|-------------|---------|--------------------|-------|-------|------|------|
| 33736_at    | STOML1  | stomatin (EPB72    | 3.24  | 1.70  | 0.00 | 0.00 |
| 221701_s_at | STRA6   | stimulated by ret  | 4.20  | 2.07  | 0.00 | 0.00 |
| 221500_s_at | STX16   | syntaxin 16        | 0.28  | -1.82 | 0.00 | 0.00 |
| 203457_at   | STX7    | syntaxin 7         | 0.29  | -1.77 | 0.00 | 0.00 |
| 203310_at   | STXBP3  | syntaxin binding   | 0.30  | -1.74 | 0.00 | 0.00 |
| 220994_s_at | STXBP6  | syntaxin binding   | 0.15  | -2.74 | 0.00 | 0.00 |
| 219425_at   | SULT4A1 | sulfotransferase   | 4.05  | 2.02  | 0.00 | 0.00 |
| 206506_s_at | SUPT3H  | suppressor of Ty   | 3.33  | 1.74  | 0.00 | 0.00 |
| 201483_s_at | SUPT4H1 | suppressor of Ty   | 3.34  | 1.74  | 0.00 | 0.00 |
| 219389_at   | SUSD4   | sushi domain co    | 7.31  | 2.87  | 0.00 | 0.00 |
| 217704_x_at | SUZ12P  | suppressor of ze   | 0.33  | -1.60 | 0.00 | 0.00 |
| 209306_s_at | SWAP70  | SWAP switching     | 0.30  | -1.76 | 0.00 | 0.00 |
| 216272_x_at | SYDE1   | synapse defectiv   | 4.15  | 2.05  | 0.00 | 0.00 |
| 44702_at    | SYDE1   | synapse defectiv   | 3.49  | 1.80  | 0.00 | 0.00 |
| 209025_s_at | SYNCRIP | synaptotagmin b    | 3.23  | 1.69  | 0.00 | 0.00 |
| 209447_at   | SYNE1   | spectrin repeat c  | 0.06  | -4.05 | 0.00 | 0.00 |
| 202761_s_at | SYNE2   | spectrin repeat c  | 0.15  | -2.77 | 0.00 | 0.00 |
| 204287_at   | SYNGR1  | synaptogyrin 1     | 0.31  | -1.68 | 0.00 | 0.00 |
| 202796_at   | SYNPO   | synaptopodin       | 5.71  | 2.51  | 0.00 | 0.00 |
| 215865_at   | SYT12   | synaptotagmin X    | 6.51  | 2.70  | 0.00 | 0.00 |
| 205613_at   | SYT17   | synaptotagmin X    | 0.24  | -2.04 | 0.00 | 0.00 |
| 206552_s_at | TAC1    | tachykinin, precu  | 0.17  | -2.54 | 0.00 | 0.00 |
| 211382_s_at | TACC2   | transforming, aci  | 0.33  | -1.59 | 0.00 | 0.00 |
| 202289_s_at | TACC2   | transforming, aci  | 0.26  | -1.93 | 0.00 | 0.00 |
| 214690_at   | TAF1B   | TATA box bindin    | 0.24  | -2.07 | 0.00 | 0.00 |
| 221617_at   | TAF9B   | TAF9B RNA pol      | 0.18  | -2.51 | 0.00 | 0.00 |
| 210978_s_at | TAGLN2  | transgelin 2       | 3.70  | 1.89  | 0.00 | 0.00 |
| 204769_s_at | TAP2    | transporter 2, AT  | 6.68  | 2.74  | 0.00 | 0.00 |
| 221264_s_at | TARDBP  | TAR DNA bindin     | 0.14  | -2.89 | 0.00 | 0.00 |
| 213786_at   | TAX1BP1 | Tax1 (human T-c    | 0.31  | -1.70 | 0.00 | 0.00 |
| 212350_at   | TBC1D1  | TBC1 (tre-2/USF    | 4.54  | 2.18  | 0.00 | 0.00 |
| 203386_at   | TBC1D4  | TBC1 domain fa     | 0.20  | -2.32 | 0.00 | 0.00 |
| 204526_s_at | TBC1D8  | TBC1 domain fa     | 0.20  | -2.32 | 0.00 | 0.00 |
| 220789_s_at | TBRG4   | transforming gro   | 3.29  | 1.72  | 0.00 | 0.00 |
| 219682_s_at | TBX3    | T-box 3            | 0.27  | -1.88 | 0.00 | 0.00 |
| 212382_at   | TCF4    | transcription fact | 0.31  | -1.71 | 0.00 | 0.00 |
| 203753_at   | TCF4    | transcription fact | 0.29  | -1.77 | 0.00 | 0.00 |
| 222146_s_at | TCF4    | transcription fact | 0.27  | -1.88 | 0.00 | 0.00 |
| 212762_s_at | TCF7L2  | transcription fact | 0.17  | -2.53 | 0.00 | 0.00 |
| 204849_at   | TCFL5   | transcription fact | 0.30  | -1.73 | 0.00 | 0.00 |
| 213780_at   | TCHH    | trichohyalin       | 6.73  | 2.75  | 0.00 | 0.00 |
| 204158_s_at | TCIRG1  | T-cell, immune ri  | 5.56  | 2.48  | 0.00 | 0.00 |
| 205513_at   | TCN1    | transcobalamin I   | 30.82 | 4.95  | 0.00 | 0.00 |
| 204043_at   | TCN2    | transcobalamin I   | 3.20  | 1.68  | 0.00 | 0.00 |
| 205797_s_at | TCP11L1 | t-complex 11 (mi   | 3.80  | 1.93  | 0.00 | 0.00 |
| 205796_at   | TCP11L1 | t-complex 11 (mi   | 3.24  | 1.70  | 0.00 | 0.00 |
| 218584_at   | TCTN1   | tectonic family m  | 3.17  | 1.66  | 0.00 | 0.00 |
| 205943_at   | TDO2    | tryptophan 2,3-d   | 4.04  | 2.02  | 0.01 | 0.01 |

|             |           |                    |       |       |      |      |
|-------------|-----------|--------------------|-------|-------|------|------|
| 219715_s_at | TDP1      | tyrosyl-DNA pho    | 3.74  | 1.90  | 0.00 | 0.00 |
| 208089_s_at | TDRD3     | tudor domain coi   | 0.19  | -2.40 | 0.00 | 0.00 |
| 212084_at   | TEX261    | testis expressed   | 4.15  | 2.05  | 0.00 | 0.00 |
| 212083_at   | TEX261    | testis expressed   | 3.23  | 1.69  | 0.00 | 0.00 |
| 204654_s_at | TFAP2A    | transcription fact | 0.13  | -2.95 | 0.00 | 0.00 |
| 214451_at   | TFAP2B    | transcription fact | 0.07  | -3.80 | 0.00 | 0.00 |
| 205688_at   | TFAP4     | transcription fact | 3.06  | 1.61  | 0.00 | 0.00 |
| 219735_s_at | TFCP2L1   | transcription fact | 3.67  | 1.88  | 0.00 | 0.00 |
| 204731_at   | TGFBR3    | transforming gro   | 0.15  | -2.74 | 0.00 | 0.00 |
| 206008_at   | TGM1      | transglutaminase   | 6.25  | 2.64  | 0.00 | 0.00 |
| 206004_at   | TGM3      | transglutaminase   | 0.21  | -2.24 | 0.00 | 0.00 |
| 222122_s_at | THOC2     | THO complex 2      | 0.32  | -1.63 | 0.00 | 0.00 |
| 1316_at     | THRA      | thyroid hormone    | 0.28  | -1.85 | 0.00 | 0.00 |
| 206555_s_at | THUMPD1   | THUMP domain       | 0.31  | -1.68 | 0.00 | 0.00 |
| 218408_at   | TIMM10    | translocase of in  | 3.40  | 1.76  | 0.00 | 0.00 |
| 201666_at   | TIMP1     | TIMP metallopro    | 4.02  | 2.01  | 0.00 | 0.00 |
| 201148_s_at | TIMP3     | TIMP metallopro    | 12.32 | 3.62  | 0.00 | 0.00 |
| 203222_s_at | TLE1      | transducin-like e  | 0.19  | -2.43 | 0.00 | 0.00 |
| 40837_at    | TLE2      | transducin-like e  | 0.33  | -1.59 | 0.01 | 0.01 |
| 216997_x_at | TLE4      | transducin-like e  | 0.30  | -1.72 | 0.00 | 0.00 |
| 204924_at   | TLR2      | toll-like receptor | 4.37  | 2.13  | 0.00 | 0.00 |
| 206271_at   | TLR3      | toll-like receptor | 0.33  | -1.60 | 0.00 | 0.00 |
| 213882_at   | TM2D1     | TM2 domain con     | 0.17  | -2.57 | 0.00 | 0.00 |
| 209387_s_at | TM4SF1    | transmembrane      | 23.17 | 4.53  | 0.00 | 0.00 |
| 215034_s_at | TM4SF1    | transmembrane      | 18.49 | 4.21  | 0.00 | 0.00 |
| 209386_at   | TM4SF1    | transmembrane      | 10.58 | 3.40  | 0.00 | 0.00 |
| 219892_at   | TM6SF1    | transmembrane      | 0.32  | -1.65 | 0.00 | 0.00 |
| 217974_at   | TM7SF3    | transmembrane      | 0.21  | -2.23 | 0.00 | 0.00 |
| 200803_s_at | TMBIM6    | transmembrane      | 3.94  | 1.98  | 0.00 | 0.00 |
| 219580_s_at | TMC5      | transmembrane      | 0.25  | -2.01 | 0.00 | 0.00 |
| 203679_at   | TMED1     | transmembrane      | 3.11  | 1.64  | 0.00 | 0.00 |
| 200929_at   | TMED10    | transmembrane      | 5.02  | 2.33  | 0.00 | 0.00 |
| 220097_s_at | TMEM104   | transmembrane      | 3.01  | 1.59  | 0.00 | 0.00 |
| 218930_s_at | TMEM106B  | transmembrane      | 0.32  | -1.63 | 0.00 | 0.00 |
| 215250_at   | TMEM111   | transmembrane      | 0.31  | -1.69 | 0.00 | 0.00 |
| 218834_s_at | TMEM132A  | transmembrane      | 13.59 | 3.77  | 0.00 | 0.00 |
| 218477_at   | TMEM14A   | transmembrane      | 3.32  | 1.73  | 0.00 | 0.00 |
| 213272_s_at | TMEM159   | transmembrane      | 0.23  | -2.10 | 0.00 | 0.00 |
| 218745_x_at | TMEM161A  | transmembrane      | 8.61  | 3.11  | 0.00 | 0.00 |
| 219253_at   | TMEM185B  | transmembrane      | 3.10  | 1.63  | 0.00 | 0.00 |
| 217016_x_at | TMEM212   | transmembrane      | 0.31  | -1.69 | 0.00 | 0.00 |
| 221512_at   | TMEM222   | transmembrane      | 4.11  | 2.04  | 0.00 | 0.00 |
| 52078_at    | TMEM222   | transmembrane      | 3.22  | 1.69  | 0.00 | 0.00 |
| 209656_s_at | TMEM47    | transmembrane      | 0.30  | -1.73 | 0.00 | 0.00 |
| 219462_at   | TMEM53    | transmembrane      | 3.48  | 1.80  | 0.00 | 0.00 |
| 221255_s_at | TMEM93    | transmembrane      | 3.32  | 1.73  | 0.00 | 0.00 |
| 213024_at   | TMF1      | TATA element rr    | 0.20  | -2.30 | 0.00 | 0.00 |
| 207602_at   | TMPRSS11D | transmembrane      | 19.38 | 4.28  | 0.00 | 0.00 |

|             |           |                        |       |       |      |      |
|-------------|-----------|------------------------|-------|-------|------|------|
| 218960_at   | TMPRSS4   | transmembrane          | 7.40  | 2.89  | 0.00 | 0.00 |
| 221032_s_at | TMPRSS5   | transmembrane          | 5.37  | 2.43  | 0.00 | 0.00 |
| 214955_at   | TMPRSS6   | transmembrane          | 3.41  | 1.77  | 0.00 | 0.00 |
| 217733_s_at | TMSB10    | thymosin beta 10       | 4.77  | 2.26  | 0.00 | 0.00 |
| 201645_at   | TNC       | tenascin C             | 15.70 | 3.97  | 0.00 | 0.00 |
| 201207_at   | TNFAIP1   | tumor necrosis factor  | 3.14  | 1.65  | 0.00 | 0.00 |
| 201208_s_at | TNFAIP1   | tumor necrosis factor  | 3.12  | 1.64  | 0.00 | 0.00 |
| 209295_at   | TNFRSF10B | tumor necrosis factor  | 3.17  | 1.66  | 0.00 | 0.00 |
| 218368_s_at | TNFRSF12A | tumor necrosis factor  | 9.24  | 3.21  | 0.00 | 0.00 |
| 203508_at   | TNFRSF1B  | tumor necrosis factor  | 4.44  | 2.15  | 0.00 | 0.00 |
| 218856_at   | TNFRSF21  | tumor necrosis factor  | 39.73 | 5.31  | 0.00 | 0.00 |
| 214581_x_at | TNFRSF21  | tumor necrosis factor  | 3.38  | 1.76  | 0.00 | 0.00 |
| 219423_x_at | TNFRSF25  | tumor necrosis factor  | 0.31  | -1.70 | 0.00 | 0.00 |
| 211841_s_at | TNFRSF25  | tumor necrosis factor  | 0.25  | -2.03 | 0.00 | 0.00 |
| 202688_at   | TNFSF10   | tumor necrosis factor  | 3.92  | 1.97  | 0.00 | 0.00 |
| 202687_s_at | TNFSF10   | tumor necrosis factor  | 3.11  | 1.64  | 0.00 | 0.00 |
| 218335_x_at | TNIP2     | TNFAIP3 interacting    | 3.17  | 1.67  | 0.00 | 0.00 |
| 218228_s_at | TNKS2     | tankyrase, TRF1        | 0.32  | -1.65 | 0.00 | 0.00 |
| 206393_at   | TNNI2     | troponin I type 2      | 0.11  | -3.19 | 0.00 | 0.00 |
| 213201_s_at | TNNT1     | troponin T type 1      | 0.30  | -1.72 | 0.00 | 0.00 |
| 215389_s_at | TNNT2     | troponin T type 2      | 0.12  | -3.06 | 0.00 | 0.00 |
| 206817_x_at | TNRC4     | trinucleotide repeat   | 5.27  | 2.40  | 0.00 | 0.00 |
| 217853_at   | TNS3      | tensin 3               | 4.08  | 2.03  | 0.00 | 0.00 |
| 217413_s_at | TNXB      | tenascin XB            | 3.17  | 1.67  | 0.00 | 0.00 |
| 208609_s_at | TNXB      | tenascin XB            | 0.27  | -1.90 | 0.00 | 0.00 |
| 221496_s_at | TOB2      | transducer of ER       | 0.30  | -1.73 | 0.00 | 0.00 |
| 202807_s_at | TOM1      | target of myb1 (c      | 3.74  | 1.90  | 0.00 | 0.00 |
| 214840_at   | TOM1L2    | target of myb1-lil     | 4.64  | 2.21  | 0.00 | 0.00 |
| 217960_s_at | TOMM22    | translocase of outer   | 4.37  | 2.13  | 0.00 | 0.00 |
| 201512_s_at | TOMM70A   | translocase of outer   | 3.32  | 1.73  | 0.00 | 0.00 |
| 204071_s_at | TOPORS    | topoisomerase I        | 0.30  | -1.74 | 0.00 | 0.00 |
| 210609_s_at | TP53I3    | tumor protein p53      | 5.58  | 2.48  | 0.00 | 0.00 |
| 201689_s_at | TPD52     | tumor protein D52      | 0.27  | -1.92 | 0.00 | 0.00 |
| 201691_s_at | TPD52     | tumor protein D52      | 0.09  | -3.54 | 0.00 | 0.00 |
| 210372_s_at | TPD52L1   | tumor protein D52L1    | 4.46  | 2.16  | 0.00 | 0.00 |
| 210987_x_at | TPM1      | tropomyosin 1 (alpha   | 7.69  | 2.94  | 0.00 | 0.00 |
| 210986_s_at | TPM1      | tropomyosin 1 (alpha   | 5.65  | 2.50  | 0.00 | 0.00 |
| 206116_s_at | TPM1      | tropomyosin 1 (alpha   | 3.42  | 1.77  | 0.00 | 0.01 |
| 209344_at   | TPM4      | tropomyosin 4          | 5.48  | 2.46  | 0.00 | 0.00 |
| 203375_s_at | TPP2      | tripeptidyl peptidase  | 0.19  | -2.37 | 0.00 | 0.00 |
| 218876_at   | TPPP3     | tubulin polymerization | 0.07  | -3.89 | 0.00 | 0.00 |
| 215220_s_at | TPR       | translocated protein   | 0.07  | -3.87 | 0.00 | 0.00 |
| 215382_x_at | TPSAB1    | tryptase alpha/beta    | 3.01  | 1.59  | 0.01 | 0.02 |
| 204079_at   | TPST2     | tyrosylprotein sulf    | 3.21  | 1.68  | 0.00 | 0.00 |
| 210052_s_at | TPX2      | TPX2, microtubule      | 3.31  | 1.73  | 0.00 | 0.00 |
| 213593_s_at | TRA2A     | transformer 2 alpha    | 0.12  | -3.11 | 0.00 | 0.00 |
| 210180_s_at | TRA2B     | transformer 2 beta     | 0.28  | -1.82 | 0.00 | 0.00 |
| 221807_s_at | TRABD     | TraB domain containing | 4.04  | 2.02  | 0.00 | 0.00 |

|             |          |                     |       |       |      |      |
|-------------|----------|---------------------|-------|-------|------|------|
| 213888_s_at | TRAF3IP3 | TRAF3 interactir    | 3.39  | 1.76  | 0.01 | 0.02 |
| 209412_at   | TRAPPC10 | trafficking proteir | 0.33  | -1.59 | 0.00 | 0.00 |
| 215269_at   | TRAPPC10 | trafficking proteir | 0.13  | -2.98 | 0.00 | 0.00 |
| 203511_s_at | TRAPPC3  | trafficking proteir | 3.81  | 1.93  | 0.00 | 0.00 |
| 56829_at    | TRAPPC9  | trafficking proteir | 6.34  | 2.67  | 0.00 | 0.00 |
| 221672_s_at | TRAPPC9  | trafficking proteir | 3.30  | 1.72  | 0.00 | 0.00 |
| 219725_at   | TREM2    | triggering recept   | 4.64  | 2.21  | 0.00 | 0.00 |
| 213293_s_at | TRIM22   | tripartite motif-cc | 5.25  | 2.39  | 0.00 | 0.00 |
| 204732_s_at | TRIM23   | tripartite motif-cc | 0.20  | -2.32 | 0.00 | 0.00 |
| 206911_at   | TRIM25   | tripartite motif-cc | 3.80  | 1.93  | 0.00 | 0.00 |
| 212116_at   | TRIM27   | tripartite motif-cc | 4.60  | 2.20  | 0.00 | 0.00 |
| 213885_at   | TRIM3    | tripartite motif-cc | 0.30  | -1.75 | 0.00 | 0.00 |
| 214815_at   | TRIM33   | tripartite motif-cc | 0.29  | -1.81 | 0.00 | 0.00 |
| 212435_at   | TRIM33   | tripartite motif-cc | 0.13  | -2.93 | 0.00 | 0.00 |
| 203610_s_at | TRIM38   | tripartite motif-cc | 7.07  | 2.82  | 0.00 | 0.00 |
| 221897_at   | TRIM52   | tripartite motif-cc | 0.20  | -2.33 | 0.00 | 0.00 |
| 210760_x_at | TRIP11   | thyroid hormone     | 4.54  | 2.18  | 0.00 | 0.00 |
| 218877_s_at | TRMT11   | tRNA methyltran     | 0.22  | -2.16 | 0.00 | 0.00 |
| 205802_at   | TRPC1    | transient receptc   | 0.25  | -1.99 | 0.00 | 0.00 |
| 205803_s_at | TRPC1    | transient receptc   | 0.20  | -2.32 | 0.00 | 0.00 |
| 206528_at   | TRPC6    | transient receptc   | 0.23  | -2.12 | 0.00 | 0.00 |
| 206479_at   | TRPM1    | transient receptc   | 0.31  | -1.69 | 0.01 | 0.01 |
| 205708_s_at | TRPM2    | transient receptc   | 3.21  | 1.68  | 0.00 | 0.00 |
| 209390_at   | TSC1     | tuberous scleros    | 0.30  | -1.75 | 0.00 | 0.00 |
| 203824_at   | TSPAN8   | tetraspanin 8       | 0.32  | -1.64 | 0.00 | 0.00 |
| 217162_at   | TSPY1    | testis specific pr  | 3.95  | 1.98  | 0.00 | 0.00 |
| 212928_at   | TSPYL4   | TSPY-like 4         | 0.29  | -1.79 | 0.00 | 0.00 |
| 213922_at   | TTBK2    | tau tubulin kinas   | 0.11  | -3.15 | 0.00 | 0.00 |
| 219758_at   | TTC26    | tetratricopeptide   | 3.04  | 1.61  | 0.00 | 0.00 |
| 208663_s_at | TTC3     | tetratricopeptide   | 0.31  | -1.70 | 0.00 | 0.00 |
| 219421_at   | TTC33    | tetratricopeptide   | 0.21  | -2.28 | 0.00 | 0.00 |
| 203048_s_at | TTC37    | tetratricopeptide   | 0.33  | -1.61 | 0.00 | 0.00 |
| 203049_s_at | TTC37    | tetratricopeptide   | 0.32  | -1.64 | 0.00 | 0.00 |
| 215898_at   | TTLL5    | tubulin tyrosine l  | 0.33  | -1.62 | 0.00 | 0.00 |
| 201090_x_at | TUBA1B   | tubulin, alpha 1b   | 3.62  | 1.86  | 0.00 | 0.00 |
| 213646_x_at | TUBA1B   | tubulin, alpha 1b   | 3.36  | 1.75  | 0.00 | 0.00 |
| 216323_x_at | TUBA3D   | tubulin, alpha 3d   | 3.32  | 1.73  | 0.00 | 0.00 |
| 211714_x_at | TUBB     | tubulin, beta       | 3.95  | 1.98  | 0.00 | 0.00 |
| 209191_at   | TUBB6    | tubulin, beta 6     | 3.58  | 1.84  | 0.00 | 0.00 |
| 214876_s_at | TUBGCP5  | tubulin, gamma c    | 0.14  | -2.81 | 0.00 | 0.00 |
| 218184_at   | TULP4    | tubby like proteir  | 0.23  | -2.10 | 0.00 | 0.00 |
| 203272_s_at | TUSC2    | tumor suppressc     | 4.28  | 2.10  | 0.00 | 0.00 |
| 213943_at   | TWIST1   | twist homolog 1     | 0.31  | -1.67 | 0.00 | 0.00 |
| 216609_at   | TXN      | thioredoxin         | 0.23  | -2.10 | 0.00 | 0.00 |
| 209078_s_at | TXN2     | thioredoxin 2       | 3.98  | 1.99  | 0.00 | 0.00 |
| 221253_s_at | TXNDC5   | thioredoxin domi    | 4.50  | 2.17  | 0.00 | 0.00 |
| 59631_at    | TXNRD3   | thioredoxin redu    | 5.28  | 2.40  | 0.00 | 0.00 |
| 204858_s_at | TYMP     | thymidine phosp     | 36.21 | 5.18  | 0.00 | 0.00 |

|             |        |                    |       |       |      |      |
|-------------|--------|--------------------|-------|-------|------|------|
| 217497_at   | TYMP   | thymidine phosp    | 3.66  | 1.87  | 0.00 | 0.00 |
| 205694_at   | TYRP1  | tyrosinase-relate  | 0.03  | -5.04 | 0.00 | 0.00 |
| 218382_s_at | U2AF2  | U2 small nuclear   | 4.59  | 2.20  | 0.00 | 0.00 |
| 218837_s_at | UBE2D4 | ubiquitin-conjuga  | 6.07  | 2.60  | 0.00 | 0.00 |
| 209041_s_at | UBE2G2 | ubiquitin-conjuga  | 3.20  | 1.68  | 0.00 | 0.00 |
| 217799_x_at | UBE2H  | ubiquitin-conjuga  | 3.80  | 1.93  | 0.00 | 0.00 |
| 211008_s_at | UBE2I  | ubiquitin-conjuga  | 3.42  | 1.77  | 0.00 | 0.00 |
| 203109_at   | UBE2M  | ubiquitin-conjuga  | 3.87  | 1.95  | 0.00 | 0.00 |
| 210685_s_at | UBE4B  | ubiquitination fac | 0.26  | -1.95 | 0.00 | 0.00 |
| 201534_s_at | UBL3   | ubiquitin-like 3   | 0.21  | -2.24 | 0.00 | 0.00 |
| 207253_s_at | UBN1   | ubuclein 1         | 4.67  | 2.22  | 0.00 | 0.00 |
| 204598_at   | UBOX5  | U-box domain cc    | 3.67  | 1.88  | 0.00 | 0.00 |
| 208883_at   | UBR5   | ubiquitin protein  | 0.30  | -1.74 | 0.00 | 0.00 |
| 212074_at   | UNC84A | unc-84 homolog     | 0.30  | -1.74 | 0.00 | 0.00 |
| 206487_at   | UNC84A | unc-84 homolog     | 0.22  | -2.17 | 0.00 | 0.00 |
| 214382_at   | UNC93A | unc-93 homolog     | 0.26  | -1.96 | 0.00 | 0.00 |
| 202330_s_at | UNG    | uracil-DNA glycc   | 0.19  | -2.43 | 0.00 | 0.00 |
| 214624_at   | UPK1A  | uroplakin 1A       | 0.21  | -2.29 | 0.00 | 0.00 |
| 203234_at   | UPP1   | uridine phosphor   | 15.58 | 3.96  | 0.00 | 0.00 |
| 215886_x_at | USP12  | ubiquitin specific | 0.23  | -2.11 | 0.00 | 0.00 |
| 212513_s_at | USP33  | ubiquitin specific | 0.31  | -1.70 | 0.00 | 0.00 |
| 212980_at   | USP34  | ubiquitin specific | 0.31  | -1.68 | 0.00 | 0.00 |
| 215013_s_at | USP34  | ubiquitin specific | 0.26  | -1.96 | 0.00 | 0.00 |
| 212065_s_at | USP34  | ubiquitin specific | 0.14  | -2.84 | 0.00 | 0.00 |
| 222032_s_at | USP7   | ubiquitin specific | 0.33  | -1.60 | 0.00 | 0.00 |
| 202745_at   | USP8   | ubiquitin specific | 0.29  | -1.81 | 0.00 | 0.00 |
| 205139_s_at | UST    | uronyl-2-sulfotra  | 0.16  | -2.69 | 0.00 | 0.00 |
| 213326_at   | VAMP1  | vesicle-associat   | 0.23  | -2.10 | 0.00 | 0.00 |
| 218807_at   | VAV3   | vav 3 guanine nu   | 0.24  | -2.08 | 0.00 | 0.00 |
| 221731_x_at | VCAN   | versican           | 4.47  | 2.16  | 0.01 | 0.01 |
| 209946_at   | VEGFC  | vascular endothe   | 6.01  | 2.59  | 0.00 | 0.00 |
| 205586_x_at | VGFB   | VEGF nerve grow    | 3.02  | 1.60  | 0.00 | 0.00 |
| 205946_at   | VIPR2  | vasoactive intest  | 7.87  | 2.98  | 0.00 | 0.00 |
| 217949_s_at | VKORC1 | vitamin K epoxid   | 4.14  | 2.05  | 0.00 | 0.00 |
| 205844_at   | VNN1   | vanin 1            | 3.91  | 1.97  | 0.01 | 0.01 |
| 220528_at   | VNN3   | vanin 3            | 5.32  | 2.41  | 0.00 | 0.00 |
| 204376_at   | VPRBP  | Vpr (HIV-1) bind   | 0.27  | -1.92 | 0.00 | 0.00 |
| 204377_s_at | VPRBP  | Vpr (HIV-1) bind   | 0.13  | -2.92 | 0.00 | 0.00 |
| 214785_at   | VPS13A | vacuolar protein   | 0.17  | -2.58 | 0.00 | 0.00 |
| 218396_at   | VPS13C | vacuolar protein   | 0.20  | -2.32 | 0.00 | 0.00 |
| 220221_at   | VPS13D | vacuolar protein   | 0.16  | -2.69 | 0.00 | 0.00 |
| 203797_at   | VSNL1  | visinin-like 1     | 4.91  | 2.30  | 0.00 | 0.00 |
| 202112_at   | VWF    | von Willebrand fi  | 3.12  | 1.64  | 0.00 | 0.00 |
| 212267_at   | WAPAL  | wings apart-like   | 0.33  | -1.59 | 0.00 | 0.00 |
| 200628_s_at | WARS   | tryptophanyl-tRN   | 9.30  | 3.22  | 0.00 | 0.00 |
| 200629_at   | WARS   | tryptophanyl-tRN   | 6.34  | 2.67  | 0.00 | 0.00 |
| 205810_s_at | WASL   | Wiskott-Aldrich s  | 3.00  | 1.59  | 0.00 | 0.00 |
| 218505_at   | WDR59  | WD repeat dom      | 0.33  | -1.62 | 0.00 | 0.00 |

|             |         |                    |      |       |      |      |
|-------------|---------|--------------------|------|-------|------|------|
| 201420_s_at | WDR77   | WD repeat dom      | 3.38 | 1.76  | 0.00 | 0.00 |
| 212533_at   | WEE1    | WEE1 homolog       | 0.23 | -2.11 | 0.00 | 0.00 |
| 210861_s_at | WISP3   | WNT1 inducible     | 4.80 | 2.26  | 0.00 | 0.00 |
| 221783_at   | WIZ     | widely interspac   | 3.36 | 1.75  | 0.00 | 0.00 |
| 39313_at    | WNK1    | WNK lysine defic   | 0.09 | -3.48 | 0.00 | 0.00 |
| 205648_at   | WNT2    | wingless-type MI   | 0.27 | -1.87 | 0.00 | 0.00 |
| 205990_s_at | WNT5A   | wingless-type MI   | 3.87 | 1.95  | 0.01 | 0.01 |
| 213155_at   | WSCD1   | WSC domain co      | 0.33 | -1.61 | 0.00 | 0.00 |
| 212637_s_at | WWP1    | WW domain con      | 0.18 | -2.47 | 0.00 | 0.00 |
| 206698_at   | XK      | X-linked Kx bloo   | 0.29 | -1.78 | 0.00 | 0.00 |
| 209375_at   | XPC     | xeroderma pigm     | 0.32 | -1.63 | 0.00 | 0.00 |
| 207598_x_at | XRCC2   | X-ray repair com   | 0.27 | -1.89 | 0.00 | 0.00 |
| 205071_x_at | XRCC4   | X-ray repair com   | 3.59 | 1.84  | 0.00 | 0.00 |
| 218911_at   | YEATS4  | YEATS domain c     | 0.14 | -2.82 | 0.00 | 0.00 |
| 202418_at   | YIF1A   | Yip1 interacting i | 3.69 | 1.88  | 0.00 | 0.00 |
| 220207_at   | YIF1B   | Yip1 interacting i | 3.17 | 1.67  | 0.00 | 0.00 |
| 65086_at    | YIPF2   | Yip1 domain farr   | 3.06 | 1.61  | 0.00 | 0.00 |
| 212343_at   | YIPF6   | Yip1 domain farr   | 0.27 | -1.87 | 0.00 | 0.00 |
| 214659_x_at | YLPM1   | YLP motif contai   | 0.32 | -1.64 | 0.00 | 0.00 |
| 214814_at   | YTHDC1  | YTH domain con     | 0.11 | -3.23 | 0.00 | 0.00 |
| 213077_at   | YTHDC2  | YTH domain con     | 0.29 | -1.80 | 0.00 | 0.00 |
| 219836_at   | ZBED2   | zinc finger, BED   | 4.71 | 2.24  | 0.01 | 0.01 |
| 213376_at   | ZBTB1   | zinc finger and B  | 0.26 | -1.93 | 0.00 | 0.00 |
| 205092_x_at | ZBTB1   | zinc finger and B  | 0.21 | -2.23 | 0.00 | 0.00 |
| 205883_at   | ZBTB16  | zinc finger and B  | 0.07 | -3.78 | 0.00 | 0.00 |
| 222357_at   | ZBTB20  | zinc finger and B  | 0.23 | -2.14 | 0.00 | 0.00 |
| 220391_at   | ZBTB3   | zinc finger and B  | 0.14 | -2.80 | 0.00 | 0.00 |
| 218810_at   | ZC3H12A | zinc finger CCH    | 9.68 | 3.27  | 0.00 | 0.00 |
| 219062_s_at | ZCCHC2  | zinc finger, CCH   | 0.28 | -1.84 | 0.00 | 0.00 |
| 212419_at   | ZCCHC24 | zinc finger, CCH   | 4.53 | 2.18  | 0.00 | 0.00 |
| 221646_s_at | ZDHHC11 | zinc finger, DHH   | 0.03 | -5.21 | 0.00 | 0.00 |
| 219296_at   | ZDHHC13 | zinc finger, DHH   | 0.23 | -2.12 | 0.00 | 0.00 |
| 217741_s_at | ZFAND5  | zinc finger, AN1-  | 3.35 | 1.74  | 0.00 | 0.00 |
| 222186_at   | ZFAND6  | zinc finger, AN1-  | 0.20 | -2.30 | 0.00 | 0.00 |
| 201369_s_at | ZFP36L2 | zinc finger protei | 0.31 | -1.69 | 0.01 | 0.01 |
| 214678_x_at | ZFX     | zinc finger protei | 0.20 | -2.29 | 0.00 | 0.00 |
| 219929_s_at | ZFYVE21 | zinc finger, FYVE  | 0.31 | -1.68 | 0.00 | 0.00 |
| 214900_at   | ZKSCAN1 | zinc finger with k | 0.22 | -2.21 | 0.00 | 0.00 |
| 218752_at   | ZMAT5   | zinc finger, matri | 7.33 | 2.87  | 0.00 | 0.00 |
| 210281_s_at | ZMYM2   | zinc finger, MYM   | 0.29 | -1.79 | 0.00 | 0.00 |
| 210282_at   | ZMYM2   | zinc finger, MYM   | 0.29 | -1.80 | 0.00 | 0.00 |
| 206652_at   | ZMYM5   | zinc finger, MYM   | 0.16 | -2.66 | 0.00 | 0.00 |
| 219925_at   | ZMYM6   | zinc finger, MYM   | 0.17 | -2.58 | 0.00 | 0.00 |
| 202137_s_at | ZMYND11 | zinc finger, MYN   | 0.23 | -2.14 | 0.00 | 0.00 |
| 209049_s_at | ZMYND8  | zinc finger, MYN   | 0.18 | -2.45 | 0.00 | 0.00 |
| 205739_x_at | ZNF107  | zinc finger protei | 0.27 | -1.89 | 0.00 | 0.00 |
| 219571_s_at | ZNF12   | zinc finger protei | 0.11 | -3.25 | 0.00 | 0.00 |
| 204234_s_at | ZNF195  | zinc finger protei | 0.26 | -1.92 | 0.00 | 0.00 |

|             |         |                    |        |       |      |      |
|-------------|---------|--------------------|--------|-------|------|------|
| 214823_at   | ZNF204  | zinc finger protei | 0.08   | -3.70 | 0.00 | 0.00 |
| 207128_s_at | ZNF223  | zinc finger protei | 0.25   | -2.02 | 0.00 | 0.00 |
| 216983_s_at | ZNF224  | zinc finger protei | 0.12   | -3.01 | 0.00 | 0.00 |
| 205791_x_at | ZNF230  | zinc finger protei | 0.27   | -1.89 | 0.00 | 0.00 |
| 219171_s_at | ZNF236  | zinc finger protei | 0.17   | -2.60 | 0.00 | 0.00 |
| 212774_at   | ZNF238  | zinc finger protei | 0.18   | -2.52 | 0.00 | 0.00 |
| 213269_at   | ZNF248  | zinc finger protei | 0.23   | -2.10 | 0.00 | 0.00 |
| 205917_at   | ZNF264  | zinc finger protei | 0.28   | -1.83 | 0.00 | 0.00 |
| 209989_at   | ZNF268  | zinc finger protei | 0.30   | -1.72 | 0.00 | 0.00 |
| 215239_x_at | ZNF273  | zinc finger protei | 0.10   | -3.35 | 0.00 | 0.00 |
| 221213_s_at | ZNF280D | zinc finger protei | 0.14   | -2.84 | 0.00 | 0.00 |
| 212366_at   | ZNF292  | zinc finger protei | 0.25   | -2.02 | 0.00 | 0.00 |
| 212368_at   | ZNF292  | zinc finger protei | 0.14   | -2.85 | 0.00 | 0.00 |
| 222016_s_at | ZNF323  | zinc finger protei | 4.64   | 2.21  | 0.00 | 0.00 |
| 213760_s_at | ZNF330  | zinc finger protei | 3.20   | 1.68  | 0.00 | 0.00 |
| 206448_at   | ZNF365  | zinc finger protei | 10.38  | 3.38  | 0.00 | 0.00 |
| 215358_x_at | ZNF37B  | zinc finger protei | 0.14   | -2.87 | 0.00 | 0.00 |
| 215429_s_at | ZNF428  | zinc finger protei | 5.43   | 2.44  | 0.00 | 0.00 |
| 222136_x_at | ZNF43   | zinc finger protei | 0.24   | -2.07 | 0.00 | 0.00 |
| 215892_at   | ZNF440  | zinc finger protei | 0.18   | -2.45 | 0.00 | 0.00 |
| 212557_at   | ZNF451  | zinc finger protei | 0.31   | -1.69 | 0.00 | 0.00 |
| 213124_at   | ZNF473  | zinc finger protei | 4.37   | 2.13  | 0.00 | 0.00 |
| 55872_at    | ZNF512B | zinc finger protei | 0.26   | -1.95 | 0.00 | 0.00 |
| 204291_at   | ZNF518A | zinc finger protei | 0.22   | -2.17 | 0.00 | 0.00 |
| 215019_x_at | ZNF528  | zinc finger protei | 3.17   | 1.66  | 0.00 | 0.00 |
| 211721_s_at | ZNF551  | zinc finger protei | 0.10   | -3.31 | 0.00 | 0.00 |
| 206648_at   | ZNF571  | zinc finger protei | 0.28   | -1.85 | 0.00 | 0.00 |
| 217627_at   | ZNF573  | zinc finger protei | 0.16   | -2.65 | 0.00 | 0.00 |
| 204175_at   | ZNF593  | zinc finger protei | 4.11   | 2.04  | 0.00 | 0.00 |
| 205594_at   | ZNF652  | zinc finger protei | 0.05   | -4.38 | 0.00 | 0.00 |
| 219239_s_at | ZNF654  | zinc finger protei | 0.24   | -2.08 | 0.00 | 0.00 |
| 220760_x_at | ZNF665  | zinc finger protei | 0.31   | -1.69 | 0.00 | 0.00 |
| 206180_x_at | ZNF747  | zinc finger protei | 5.84   | 2.55  | 0.00 | 0.00 |
| 219995_s_at | ZNF750  | zinc finger protei | 0.28   | -1.83 | 0.02 | 0.02 |
| 219627_at   | ZNF767  | zinc finger family | 0.27   | -1.87 | 0.00 | 0.00 |
| 219781_s_at | ZNF771  | zinc finger protei | 7.59   | 2.92  | 0.00 | 0.00 |
| 214138_at   | ZNF79   | zinc finger protei | 4.30   | 2.10  | 0.00 | 0.00 |
| 60794_f_at  | ZNF814  | zinc finger protei | 0.22   | -2.16 | 0.00 | 0.00 |
| 219676_at   | ZSCAN16 | zinc finger and S  | 0.28   | -1.86 | 0.00 | 0.00 |
| 218312_s_at | ZSCAN18 | zinc finger and S  | 0.12   | -3.07 | 0.00 | 0.00 |
| 217593_at   | ZSCAN18 | zinc finger and S  | 0.12   | -3.09 | 0.00 | 0.00 |
| 214580_x_at |         |                    | 530.47 | 9.05  | 0.00 | 0.00 |
| 210413_x_at |         |                    | 59.98  | 5.91  | 0.00 | 0.00 |
| 208539_x_at |         |                    | 53.48  | 5.74  | 0.00 | 0.00 |
| 215504_x_at |         |                    | 10.00  | 3.32  | 0.00 | 0.00 |
| 218822_s_at |         |                    | 9.35   | 3.23  | 0.00 | 0.00 |
| 216745_x_at |         |                    | 7.95   | 2.99  | 0.00 | 0.00 |
| 221059_s_at |         |                    | 7.63   | 2.93  | 0.00 | 0.00 |



|             |      |      |      |      |
|-------------|------|------|------|------|
| 217619_x_at | 7.30 | 2.87 | 0.00 | 0.00 |
| 204438_at   | 7.28 | 2.87 | 0.00 | 0.00 |
| 219489_s_at | 6.72 | 2.75 | 0.00 | 0.00 |
| 214463_x_at | 6.33 | 2.66 | 0.00 | 0.00 |
| 222114_x_at | 6.05 | 2.60 | 0.00 | 0.00 |
| 216499_at   | 5.35 | 2.42 | 0.00 | 0.00 |
| 205114_s_at | 5.01 | 2.33 | 0.00 | 0.00 |
| 216554_s_at | 4.91 | 2.30 | 0.00 | 0.00 |
| 214290_s_at | 4.90 | 2.29 | 0.00 | 0.00 |
| 211691_x_at | 4.88 | 2.29 | 0.00 | 0.00 |
| 216474_x_at | 4.86 | 2.28 | 0.00 | 0.00 |
| 202632_at   | 4.72 | 2.24 | 0.00 | 0.00 |
| 217516_x_at | 4.67 | 2.22 | 0.00 | 0.00 |
| 216535_at   | 4.66 | 2.22 | 0.00 | 0.00 |
| 210387_at   | 4.56 | 2.19 | 0.00 | 0.00 |
| 216565_x_at | 4.54 | 2.18 | 0.00 | 0.00 |
| 216694_at   | 4.20 | 2.07 | 0.00 | 0.00 |
| 217055_x_at | 4.16 | 2.06 | 0.00 | 0.00 |
| 215489_x_at | 4.08 | 2.03 | 0.00 | 0.00 |
| 205980_s_at | 4.03 | 2.01 | 0.00 | 0.00 |
| 210915_x_at | 4.03 | 2.01 | 0.00 | 0.00 |
| 208580_x_at | 4.00 | 2.00 | 0.00 | 0.00 |
| 57540_at    | 3.96 | 1.99 | 0.00 | 0.00 |
| 206302_s_at | 3.95 | 1.98 | 0.00 | 0.00 |
| 209372_x_at | 3.85 | 1.94 | 0.00 | 0.00 |
| 200885_at   | 3.82 | 1.93 | 0.00 | 0.00 |
| 213690_s_at | 3.75 | 1.91 | 0.00 | 0.00 |
| 206063_x_at | 3.57 | 1.84 | 0.00 | 0.00 |
| 216371_at   | 3.51 | 1.81 | 0.00 | 0.00 |
| 220445_s_at | 3.49 | 1.80 | 0.00 | 0.00 |
| 216138_at   | 3.47 | 1.80 | 0.00 | 0.00 |
| 218280_x_at | 3.46 | 1.79 | 0.00 | 0.00 |
| 212444_at   | 3.42 | 1.78 | 0.00 | 0.00 |
| 216542_x_at | 3.38 | 1.76 | 0.00 | 0.00 |
| 208540_x_at | 3.37 | 1.75 | 0.00 | 0.00 |
| 215353_at   | 3.36 | 1.75 | 0.00 | 0.00 |
| 221969_at   | 3.34 | 1.74 | 0.01 | 0.01 |
| 205717_x_at | 3.31 | 1.73 | 0.00 | 0.00 |
| 215949_x_at | 3.26 | 1.70 | 0.00 | 0.00 |
| 205890_s_at | 3.25 | 1.70 | 0.02 | 0.03 |
| 216806_at   | 3.23 | 1.69 | 0.00 | 0.00 |
| 217998_at   | 3.18 | 1.67 | 0.00 | 0.00 |
| 210474_s_at | 3.17 | 1.66 | 0.00 | 0.00 |
| 215261_at   | 3.17 | 1.66 | 0.00 | 0.00 |
| 216668_at   | 3.13 | 1.65 | 0.00 | 0.00 |
| 216562_at   | 3.08 | 1.63 | 0.00 | 0.00 |
| 205272_s_at | 3.08 | 1.62 | 0.00 | 0.00 |
| 216043_x_at | 3.03 | 1.60 | 0.00 | 0.00 |

|             |      |       |      |      |
|-------------|------|-------|------|------|
| 205955_at   | 0.33 | -1.59 | 0.00 | 0.00 |
| 213212_x_at | 0.33 | -1.59 | 0.00 | 0.00 |
| 216628_at   | 0.33 | -1.59 | 0.00 | 0.00 |
| 210491_at   | 0.33 | -1.60 | 0.00 | 0.00 |
| 31799_at    | 0.32 | -1.63 | 0.00 | 0.00 |
| 200856_x_at | 0.32 | -1.64 | 0.00 | 0.00 |
| 213739_at   | 0.32 | -1.63 | 0.00 | 0.00 |
| 215928_at   | 0.32 | -1.64 | 0.00 | 0.00 |
| 222375_at   | 0.32 | -1.65 | 0.00 | 0.00 |
| 215802_at   | 0.32 | -1.65 | 0.00 | 0.00 |
| 215612_at   | 0.32 | -1.66 | 0.00 | 0.00 |
| 222371_at   | 0.32 | -1.66 | 0.00 | 0.00 |
| 206848_at   | 0.32 | -1.66 | 0.00 | 0.00 |
| 217604_at   | 0.32 | -1.66 | 0.00 | 0.00 |
| 214808_at   | 0.31 | -1.70 | 0.00 | 0.00 |
| 217659_at   | 0.31 | -1.70 | 0.00 | 0.00 |
| 222319_at   | 0.31 | -1.70 | 0.00 | 0.00 |
| 215304_at   | 0.31 | -1.71 | 0.00 | 0.00 |
| 217554_at   | 0.31 | -1.71 | 0.00 | 0.00 |
| 216211_at   | 0.31 | -1.71 | 0.00 | 0.00 |
| 222335_at   | 0.31 | -1.71 | 0.00 | 0.00 |
| 215578_at   | 0.30 | -1.72 | 0.00 | 0.00 |
| 216783_at   | 0.30 | -1.72 | 0.00 | 0.00 |
| 219151_s_at | 0.30 | -1.72 | 0.00 | 0.00 |
| 220809_at   | 0.30 | -1.72 | 0.00 | 0.00 |
| 210598_at   | 0.30 | -1.72 | 0.00 | 0.00 |
| 215140_at   | 0.30 | -1.73 | 0.00 | 0.00 |
| 216769_x_at | 0.30 | -1.73 | 0.00 | 0.00 |
| 212920_at   | 0.30 | -1.74 | 0.00 | 0.00 |
| 215164_at   | 0.30 | -1.74 | 0.00 | 0.00 |
| 222159_at   | 0.30 | -1.75 | 0.00 | 0.00 |
| 204060_s_at | 0.30 | -1.75 | 0.00 | 0.00 |
| 213971_s_at | 0.30 | -1.75 | 0.00 | 0.00 |
| 213648_at   | 0.30 | -1.76 | 0.00 | 0.00 |
| 215147_at   | 0.29 | -1.77 | 0.00 | 0.00 |
| 217610_at   | 0.29 | -1.77 | 0.00 | 0.00 |
| 220175_s_at | 0.29 | -1.77 | 0.00 | 0.00 |
| 217713_x_at | 0.29 | -1.78 | 0.00 | 0.00 |
| 215059_at   | 0.29 | -1.79 | 0.00 | 0.00 |
| 216000_at   | 0.29 | -1.79 | 0.00 | 0.00 |
| 208078_s_at | 0.29 | -1.80 | 0.00 | 0.00 |
| 217653_x_at | 0.29 | -1.79 | 0.00 | 0.00 |
| 217519_at   | 0.28 | -1.82 | 0.00 | 0.00 |
| 215597_x_at | 0.28 | -1.84 | 0.00 | 0.00 |
| 217679_x_at | 0.28 | -1.83 | 0.00 | 0.00 |
| 216142_at   | 0.28 | -1.84 | 0.00 | 0.00 |
| 215370_at   | 0.28 | -1.85 | 0.00 | 0.00 |
| 222344_at   | 0.28 | -1.85 | 0.00 | 0.00 |

|             |      |       |      |      |
|-------------|------|-------|------|------|
| 212182_at   | 0.28 | -1.85 | 0.00 | 0.00 |
| 222372_at   | 0.27 | -1.87 | 0.00 | 0.00 |
| 217586_x_at | 0.27 | -1.88 | 0.00 | 0.00 |
| 220033_at   | 0.27 | -1.88 | 0.00 | 0.00 |
| 214945_at   | 0.27 | -1.90 | 0.01 | 0.02 |
| 212842_x_at | 0.27 | -1.90 | 0.00 | 0.00 |
| 215956_at   | 0.27 | -1.92 | 0.00 | 0.00 |
| 222326_at   | 0.26 | -1.93 | 0.00 | 0.00 |
| 215029_at   | 0.26 | -1.94 | 0.00 | 0.00 |
| 220912_at   | 0.26 | -1.93 | 0.00 | 0.00 |
| 216411_s_at | 0.26 | -1.94 | 0.00 | 0.00 |
| 216214_at   | 0.26 | -1.95 | 0.00 | 0.00 |
| 216094_at   | 0.26 | -1.95 | 0.00 | 0.00 |
| 216069_at   | 0.26 | -1.97 | 0.00 | 0.00 |
| 214857_at   | 0.25 | -1.98 | 0.00 | 0.00 |
| 212867_at   | 0.25 | -2.00 | 0.00 | 0.00 |
| 216497_at   | 0.25 | -2.01 | 0.00 | 0.00 |
| 220905_at   | 0.25 | -2.01 | 0.00 | 0.00 |
| 222149_x_at | 0.25 | -2.02 | 0.00 | 0.00 |
| 210410_s_at | 0.25 | -2.02 | 0.00 | 0.00 |
| 217588_at   | 0.25 | -2.03 | 0.00 | 0.00 |
| 220696_at   | 0.24 | -2.04 | 0.00 | 0.00 |
| 215545_at   | 0.24 | -2.04 | 0.00 | 0.00 |
| 203852_s_at | 0.24 | -2.08 | 0.00 | 0.00 |
| 203240_at   | 0.24 | -2.08 | 0.00 | 0.00 |
| 215390_at   | 0.23 | -2.10 | 0.00 | 0.00 |
| 217152_at   | 0.23 | -2.10 | 0.00 | 0.00 |
| 215172_at   | 0.23 | -2.14 | 0.00 | 0.00 |
| 215629_s_at | 0.23 | -2.14 | 0.00 | 0.00 |
| 222341_x_at | 0.23 | -2.14 | 0.00 | 0.00 |
| 215576_at   | 0.22 | -2.16 | 0.00 | 0.00 |
| 213931_at   | 0.22 | -2.18 | 0.00 | 0.00 |
| 217690_at   | 0.22 | -2.18 | 0.00 | 0.00 |
| 222111_at   | 0.22 | -2.18 | 0.00 | 0.00 |
| 206088_at   | 0.22 | -2.18 | 0.00 | 0.00 |
| 220612_at   | 0.22 | -2.19 | 0.00 | 0.00 |
| 214375_at   | 0.22 | -2.20 | 0.00 | 0.00 |
| 217137_x_at | 0.22 | -2.21 | 0.00 | 0.00 |
| 222277_at   | 0.21 | -2.23 | 0.00 | 0.00 |
| 216022_at   | 0.21 | -2.25 | 0.00 | 0.00 |
| 222358_x_at | 0.21 | -2.25 | 0.00 | 0.00 |
| 217019_at   | 0.20 | -2.36 | 0.00 | 0.00 |
| 215786_at   | 0.19 | -2.37 | 0.00 | 0.00 |
| 221079_s_at | 0.19 | -2.39 | 0.00 | 0.00 |
| 214871_x_at | 0.19 | -2.39 | 0.00 | 0.00 |
| 215133_s_at | 0.19 | -2.42 | 0.00 | 0.00 |
| 213686_at   | 0.18 | -2.44 | 0.00 | 0.00 |
| 216173_at   | 0.18 | -2.48 | 0.00 | 0.00 |

|             |      |       |      |      |
|-------------|------|-------|------|------|
| 215212_at   | 0.18 | -2.49 | 0.00 | 0.00 |
| 215378_at   | 0.18 | -2.50 | 0.00 | 0.00 |
| 214807_at   | 0.18 | -2.51 | 0.00 | 0.00 |
| 221833_at   | 0.18 | -2.51 | 0.00 | 0.00 |
| 217164_at   | 0.17 | -2.52 | 0.00 | 0.00 |
| 215626_at   | 0.17 | -2.53 | 0.00 | 0.00 |
| 208154_at   | 0.17 | -2.56 | 0.00 | 0.00 |
| 215344_at   | 0.17 | -2.58 | 0.00 | 0.00 |
| 213156_at   | 0.16 | -2.63 | 0.00 | 0.00 |
| 217671_at   | 0.16 | -2.63 | 0.00 | 0.00 |
| 215287_at   | 0.16 | -2.65 | 0.00 | 0.00 |
| 220969_s_at | 0.16 | -2.66 | 0.00 | 0.00 |
| 213930_at   | 0.16 | -2.67 | 0.00 | 0.00 |
| 215191_at   | 0.16 | -2.68 | 0.00 | 0.00 |
| 217014_s_at | 0.16 | -2.69 | 0.00 | 0.00 |
| 222290_at   | 0.15 | -2.70 | 0.00 | 0.00 |
| 221834_at   | 0.15 | -2.71 | 0.00 | 0.00 |
| 222214_at   | 0.15 | -2.74 | 0.00 | 0.00 |
| 216756_at   | 0.15 | -2.77 | 0.00 | 0.00 |
| 220728_at   | 0.14 | -2.80 | 0.00 | 0.00 |
| 216278_at   | 0.14 | -2.83 | 0.00 | 0.00 |
| 217336_at   | 0.14 | -2.83 | 0.00 | 0.00 |
| 214235_at   | 0.14 | -2.86 | 0.00 | 0.00 |
| 217353_at   | 0.14 | -2.85 | 0.00 | 0.00 |
| 217643_x_at | 0.14 | -2.86 | 0.00 | 0.00 |
| 214234_s_at | 0.14 | -2.88 | 0.00 | 0.00 |
| 222313_at   | 0.14 | -2.88 | 0.00 | 0.00 |
| 222282_at   | 0.13 | -2.93 | 0.00 | 0.00 |
| 205728_at   | 0.13 | -2.95 | 0.00 | 0.00 |
| 215385_at   | 0.13 | -2.95 | 0.00 | 0.00 |
| 215555_at   | 0.13 | -3.00 | 0.00 | 0.00 |
| 222366_at   | 0.12 | -3.01 | 0.00 | 0.00 |
| 215083_at   | 0.12 | -3.03 | 0.00 | 0.00 |
| 215123_at   | 0.12 | -3.06 | 0.00 | 0.00 |
| 215204_at   | 0.12 | -3.07 | 0.00 | 0.00 |
| 217536_x_at | 0.12 | -3.07 | 0.00 | 0.00 |
| 205871_at   | 0.12 | -3.09 | 0.00 | 0.00 |
| 220855_at   | 0.12 | -3.09 | 0.00 | 0.00 |
| 222316_at   | 0.11 | -3.18 | 0.00 | 0.00 |
| 213158_at   | 0.11 | -3.22 | 0.00 | 0.00 |
| 220711_at   | 0.11 | -3.23 | 0.00 | 0.00 |
| 216006_at   | 0.10 | -3.26 | 0.00 | 0.00 |
| 215599_at   | 0.10 | -3.28 | 0.00 | 0.00 |
| 213397_x_at | 0.10 | -3.29 | 0.00 | 0.00 |
| 222308_x_at | 0.10 | -3.38 | 0.00 | 0.00 |
| 216527_at   | 0.09 | -3.40 | 0.00 | 0.00 |
| 215635_at   | 0.09 | -3.44 | 0.00 | 0.00 |
| 215392_at   | 0.09 | -3.45 | 0.00 | 0.00 |

|             |      |       |      |      |
|-------------|------|-------|------|------|
| 216614_at   | 0.08 | -3.64 | 0.00 | 0.00 |
| 206655_s_at | 0.08 | -3.66 | 0.00 | 0.00 |
| 214415_at   | 0.07 | -3.85 | 0.00 | 0.00 |
| 212913_at   | 0.07 | -3.91 | 0.00 | 0.00 |
| 208498_s_at | 0.06 | -4.01 | 0.00 | 0.00 |
| 215322_at   | 0.06 | -4.02 | 0.00 | 0.00 |
| 222368_at   | 0.06 | -4.03 | 0.00 | 0.00 |
| 220038_at   | 0.05 | -4.41 | 0.00 | 0.00 |
| 215768_at   | 0.04 | -4.53 | 0.00 | 0.00 |
